# Supplementary material for: Characterisation of MRSA strains isolated from patients in a hospital in Riyadh, Kingdom of Saudi Arabia
Source: PubMed Central journal article supplement (PMC3464608; doi:10.1186/1471-2180-12-146), 2012-07-23
Supplement: 1471-2180-12-146-S1.pdf [file 1471-2180-12-146-S1.pdf]

|                                                          | METHICILLIN RESISTANCE AND SCCmec TYPING              |                                           |                                                                 |                                             |        |                                   |                                           |        |                                             |                   |                                            |                                           |                         |
|----------------------------------------------------------|-------------------------------------------------------|-------------------------------------------|-----------------------------------------------------------------|---------------------------------------------|--------|-----------------------------------|-------------------------------------------|--------|---------------------------------------------|-------------------|--------------------------------------------|-------------------------------------------|-------------------------|
|                                                          | meCA                                                  | delta_mecR                                | ugpQ                                                            | ccrA-1                                      | ccrB-1 | plSCC (COL)                       | Q9XB68-dcs                                | ccrA-2 | ccrB-2                                      | kdpA/B/C/D /E-SCC | mecI                                       | mecR                                      | xylR                    |
|                                                          | alternate penicillin binding protein 2, defining MRSA | truncated signal transducer protein MecR1 | glycophosphoryl diester phosphodiesterase, associated with meCA | cassette chromosome recombinase genes A/B-1 |        | plasmid sensitive surface protein | hypothetical protein from SCCmec elements |        | cassette chromosome recombinase genes A/B-2 |                   | potassium transporter locus from SCCmec II | methicillin-resistance regulatory protein | signal transducer MecR1 |
| <b>CC1-MRSA-IV&amp;SCCfus, WA MRSA-1/45</b>              |                                                       |                                           |                                                                 |                                             |        |                                   |                                           |        |                                             |                   |                                            |                                           |                         |
| Riyadh-3108609                                           | POS                                                   | POS                                       | POS                                                             | POS                                         | POS    | NEG                               | NEG                                       | POS    | POS                                         | NEG               | NEG                                        | NEG                                       | NEG                     |
| Riyadh-2913235                                           | POS                                                   | POS                                       | POS                                                             | POS                                         | POS    | NEG                               | NEG                                       | POS    | POS                                         | NEG               | NEG                                        | NEG                                       | NEG                     |
| <b>CC1/ST772-MRSA-V [PVL+], "Bengal Bay Clone/WA I"</b>  |                                                       |                                           |                                                                 |                                             |        |                                   |                                           |        |                                             |                   |                                            |                                           |                         |
| Riyadh-2819026                                           | POS                                                   | NEG                                       | POS                                                             | NEG                                         | NEG    | NEG                               | NEG                                       | NEG    | NEG                                         | NEG               | NEG                                        | NEG                                       | AMB                     |
| <b>CC5-MRSA-IV, Paediatric clone</b>                     |                                                       |                                           |                                                                 |                                             |        |                                   |                                           |        |                                             |                   |                                            |                                           |                         |
| Riyadh-2915327-1                                         | POS                                                   | POS                                       | POS                                                             | NEG                                         | NEG    | NEG                               | POS                                       | POS    | POS                                         | NEG               | NEG                                        | NEG                                       | NEG                     |
| Riyadh-2915327-2                                         | POS                                                   | POS                                       | POS                                                             | NEG                                         | NEG    | NEG                               | POS                                       | POS    | POS                                         | NEG               | NEG                                        | NEG                                       | NEG                     |
| Riyadh-2                                                 | POS                                                   | POS                                       | POS                                                             | NEG                                         | NEG    | NEG                               | POS                                       | POS    | POS                                         | NEG               | NEG                                        | NEG                                       | NEG                     |
| <b>CC5-MRSA-IV [PVL+], Paediatric clone</b>              |                                                       |                                           |                                                                 |                                             |        |                                   |                                           |        |                                             |                   |                                            |                                           |                         |
| Riyadh-2986666                                           | POS                                                   | POS                                       | POS                                                             | NEG                                         | NEG    | NEG                               | POS                                       | POS    | POS                                         | NEG               | NEG                                        | NEG                                       | NEG                     |
| Riyadh-2913235                                           | POS                                                   | POS                                       | POS                                                             | NEG                                         | NEG    | NEG                               | POS                                       | POS    | POS                                         | NEG               | NEG                                        | NEG                                       | NEG                     |
| <b>CC5-MRSA-IVvar, "Maltese Clone"</b>                   |                                                       |                                           |                                                                 |                                             |        |                                   |                                           |        |                                             |                   |                                            |                                           |                         |
| Riyadh-2983654                                           | POS                                                   | POS                                       | POS                                                             | AMB                                         | AMB    | NEG                               | POS                                       | POS    | POS                                         | NEG               | NEG                                        | NEG                                       | NEG                     |
| Riyadh-4                                                 | POS                                                   | POS                                       | POS                                                             | NEG                                         | NEG    | NEG                               | POS                                       | POS    | POS                                         | NEG               | NEG                                        | NEG                                       | NEG                     |
| Riyadh-2790233                                           | POS                                                   | POS                                       | POS                                                             | NEG                                         | AMB    | NEG                               | POS                                       | POS    | POS                                         | NEG               | NEG                                        | NEG                                       | NEG                     |
| <b>CC5-MRSA-V</b>                                        |                                                       |                                           |                                                                 |                                             |        |                                   |                                           |        |                                             |                   |                                            |                                           |                         |
| Riyadh-2568944                                           | POS                                                   | NEG                                       | POS                                                             | NEG                                         | NEG    | NEG                               | NEG                                       | NEG    | NEG                                         | NEG               | NEG                                        | NEG                                       | NEG                     |
| <b>CC6-MRSA-IV, WA MRSA-51/66</b>                        |                                                       |                                           |                                                                 |                                             |        |                                   |                                           |        |                                             |                   |                                            |                                           |                         |
| Riyadh-2566168                                           | POS                                                   | POS                                       | POS                                                             | NEG                                         | NEG    | NEG                               | POS                                       | POS    | POS                                         | NEG               | NEG                                        | NEG                                       | NEG                     |
| Riyadh-2824507                                           | POS                                                   | POS                                       | POS                                                             | NEG                                         | NEG    | NEG                               | POS                                       | POS    | POS                                         | NEG               | NEG                                        | NEG                                       | NEG                     |
| Riyadh-2990831                                           | POS                                                   | POS                                       | POS                                                             | NEG                                         | NEG    | NEG                               | POS                                       | POS    | POS                                         | NEG               | NEG                                        | NEG                                       | NEG                     |
| <b>CC9/ST239-MRSA-III, Vienna/Hungarian/Brazilian Cl</b> |                                                       |                                           |                                                                 |                                             |        |                                   |                                           |        |                                             |                   |                                            |                                           |                         |
| Riyadh-9                                                 | POS                                                   | POS                                       | POS                                                             | NEG                                         | POS    | NEG                               | NEG                                       | NEG    | NEG                                         | NEG               | POS                                        | POS                                       | POS                     |
| Riyadh-3028763                                           | POS                                                   | POS                                       | POS                                                             | NEG                                         | POS    | NEG                               | NEG                                       | NEG    | NEG                                         | NEG               | POS                                        | POS                                       | POS                     |
| Riyadh-2817437                                           | POS                                                   | POS                                       | POS                                                             | NEG                                         | POS    | NEG                               | NEG                                       | NEG    | NEG                                         | NEG               | POS                                        | POS                                       | POS                     |
| Riyadh-2793706                                           | POS                                                   | POS                                       | POS                                                             | NEG                                         | POS    | NEG                               | NEG                                       | NEG    | NEG                                         | NEG               | POS                                        | POS                                       | POS                     |
| Riyadh-2818797                                           | POS                                                   | POS                                       | POS                                                             | NEG                                         | POS    | NEG                               | NEG                                       | NEG    | NEG                                         | NEG               | POS                                        | POS                                       | POS                     |
| Riyadh-2822825                                           | POS                                                   | POS                                       | POS                                                             | NEG                                         | POS    | NEG                               | NEG                                       | NEG    | NEG                                         | NEG               | POS                                        | POS                                       | POS                     |
| Riyadh-2888905                                           | POS                                                   | POS                                       | POS                                                             | NEG                                         | POS    | NEG                               | NEG                                       | NEG    | NEG                                         | NEG               | POS                                        | POS                                       | POS                     |
| Riyadh-2888915                                           | POS                                                   | POS                                       | POS                                                             | NEG                                         | POS    | NEG                               | NEG                                       | NEG    | NEG                                         | NEG               | POS                                        | POS                                       | POS                     |
| Riyadh-2567782                                           | POS                                                   | POS                                       | POS                                                             | NEG                                         | AMB    | NEG                               | NEG                                       | NEG    | NEG                                         | NEG               | POS                                        | POS                                       | POS                     |
| Riyadh-2891670                                           | POS                                                   | POS                                       | POS                                                             | NEG                                         | POS    | NEG                               | NEG                                       | NEG    | NEG                                         | NEG               | POS                                        | POS                                       | POS                     |
| Riyadh-3006920                                           | POS                                                   | POS                                       | POS                                                             | NEG                                         | AMB    | NEG                               | NEG                                       | NEG    | NEG                                         | NEG               | POS                                        | POS                                       | POS                     |
| Riyadh-2817276-1                                         | POS                                                   | POS                                       | POS                                                             | NEG                                         | AMB    | NEG                               | NEG                                       | NEG    | NEG                                         | NEG               | POS                                        | POS                                       | POS                     |
| Riyadh-0295102                                           | POS                                                   | POS                                       | POS                                                             | NEG                                         | AMB    | NEG                               | NEG                                       | NEG    | NEG                                         | NEG               | POS                                        | POS                                       | POS                     |
| Riyadh-2820597                                           | POS                                                   | POS                                       | POS                                                             | NEG                                         | POS    | NEG                               | NEG                                       | NEG    | NEG                                         | NEG               | POS                                        | POS                                       | POS                     |
| Riyadh-2822088                                           | POS                                                   | POS                                       | POS                                                             | NEG                                         | POS    | NEG                               | NEG                                       | NEG    | NEG                                         | NEG               | POS                                        | POS                                       | POS                     |
| Riyadh-3010092                                           | POS                                                   | POS                                       | POS                                                             | NEG                                         | AMB    | NEG                               | NEG                                       | NEG    | NEG                                         | NEG               | POS                                        | POS                                       | POS                     |
| Riyadh-3022844                                           | POS                                                   | POS                                       | POS                                                             | NEG                                         | AMB    | NEG                               | NEG                                       | NEG    | NEG                                         | NEG               | POS                                        | POS                                       | POS                     |
| Riyadh-3108214-2                                         | POS                                                   | POS                                       | POS                                                             | NEG                                         | NEG    | NEG                               | NEG                                       | NEG    | NEG                                         | NEG               | POS                                        | POS                                       | POS                     |
| Riyadh-2823926                                           | POS                                                   | POS                                       | POS                                                             | NEG                                         | POS    | NEG                               | NEG                                       | NEG    | NEG                                         | NEG               | POS                                        | POS                                       | POS                     |
| Riyadh-1                                                 | POS                                                   | POS                                       | POS                                                             | NEG                                         | POS    | NEG                               | NEG                                       | NEG    | NEG                                         | NEG               | POS                                        | POS                                       | POS                     |
| Riyadh-2818388                                           | POS                                                   | POS                                       | POS                                                             | NEG                                         | POS    | NEG                               | NEG                                       | NEG    | NEG                                         | NEG               | POS                                        | POS                                       | POS                     |
| Riyadh-3112315                                           | POS                                                   | POS                                       | POS                                                             | NEG                                         | POS    | NEG                               | NEG                                       | NEG    | NEG                                         | NEG               | POS                                        | POS                                       | POS                     |
| <b>CC9/ST834-MRSA-(atypical SCCmec)</b>                  |                                                       |                                           |                                                                 |                                             |        |                                   |                                           |        |                                             |                   |                                            |                                           |                         |
| Riyadh-3103521                                           | POS                                                   | POS                                       | POS                                                             | NEG                                         | NEG    | NEG                               | POS                                       | NEG    | NEG                                         | NEG               | NEG                                        | NEG                                       | NEG                     |
| <b>CC22-MRSA-IV, Barnim/UK-EMRSA-15</b>                  |                                                       |                                           |                                                                 |                                             |        |                                   |                                           |        |                                             |                   |                                            |                                           |                         |
| Riyadh-2553359                                           | POS                                                   | POS                                       | POS                                                             | NEG                                         | NEG    | NEG                               | NEG                                       | POS    | POS                                         | NEG               | NEG                                        | NEG                                       | NEG                     |
| Riyadh-2571758                                           | POS                                                   | POS                                       | POS                                                             | NEG                                         | NEG    | NEG                               | NEG                                       | POS    | POS                                         | NEG               | NEG                                        | NEG                                       | NEG                     |
| Riyadh-3029203                                           | POS                                                   | POS                                       | POS                                                             | NEG                                         | NEG    | NEG                               | NEG                                       | POS    | POS                                         | NEG               | NEG                                        | NEG                                       | NEG                     |
| Riyadh-3039785                                           | POS                                                   | POS                                       | POS                                                             | NEG                                         | NEG    | NEG                               | NEG                                       | POS    | POS                                         | NEG               | NEG                                        | NEG                                       | NEG                     |
| Riyadh-3105594                                           | POS                                                   | POS                                       | POS                                                             | NEG                                         | NEG    | NEG                               | NEG                                       | POS    | POS                                         | NEG               | NEG                                        | NEG                                       | NEG                     |
| Riyadh_IC_204-2                                          | POS                                                   | POS                                       | POS                                                             | NEG                                         | NEG    | NEG                               | NEG                                       | POS    | POS                                         | NEG               | NEG                                        | NEG                                       | NEG                     |
| Riyadh-3003974                                           | POS                                                   | POS                                       | POS                                                             | NEG                                         | NEG    | NEG                               | NEG                                       | POS    | POS                                         | NEG               | NEG                                        | NEG                                       | NEG                     |
| Riyadh_IC_067                                            | POS                                                   | POS                                       | POS                                                             | NEG                                         | NEG    | NEG                               | NEG                                       | POS    | POS                                         | NEG               | NEG                                        | NEG                                       | NEG                     |
| Riyadh-2988627                                           | POS                                                   | POS                                       | POS                                                             | NEG                                         | NEG    | NEG                               | NEG                                       | POS    | POS                                         | NEG               | NEG                                        | NEG                                       | NEG                     |
| Riyadh-3112581                                           | POS                                                   | POS                                       | POS                                                             | NEG                                         | NEG    | NEG                               | NEG                                       | POS    | POS                                         | NEG               | NEG                                        | NEG                                       | NEG                     |
| <b>CC22-MRSA-IV [PVL+]</b>                               |                                                       |                                           |                                                                 |                                             |        |                                   |                                           |        |                                             |                   |                                            |                                           |                         |
| Riyadh-2781995-1                                         | POS                                                   | POS                                       | POS                                                             | NEG                                         | NEG    | NEG                               | POS                                       | POS    | POS                                         | NEG               | NEG                                        | NEG                                       | NEG                     |
| Riyadh-3103432                                           | POS                                                   | POS                                       | POS                                                             | NEG                                         | NEG    | NEG                               | POS                                       | POS    | POS                                         | NEG               | NEG                                        | NEG                                       | NEG                     |
| Riyadh-3026502                                           | POS                                                   | POS                                       | POS                                                             | NEG                                         | NEG    | NEG                               | AMB                                       | POS    | POS                                         | NEG               | NEG                                        | NEG                                       | NEG                     |
| Riyadh-3081378-2                                         | POS                                                   | POS                                       | POS                                                             | NEG                                         | NEG    | NEG                               | AMB                                       | POS    | POS                                         | NEG               | NEG                                        | NEG                                       | NEG                     |
| Riyadh_IC_185                                            | POS                                                   | POS                                       | POS                                                             | NEG                                         | NEG    | NEG                               | POS                                       | POS    | POS                                         | NEG               | NEG                                        | NEG                                       | NEG                     |
| Riyadh_IC_204-1                                          | POS                                                   | POS                                       | POS                                                             | NEG                                         | NEG    | NEG                               | POS                                       | POS    | POS                                         | NEG               | NEG                                        | NEG                                       | NEG                     |
| Riyadh-1559371                                           | POS                                                   | POS                                       | POS                                                             | NEG                                         | NEG    | NEG                               | POS                                       | POS    | POS                                         | NEG               | NEG                                        | NEG                                       | NEG                     |
| Riyadh-2753975                                           | POS                                                   | POS                                       | POS                                                             | NEG                                         | NEG    | NEG                               | POS                                       | POS    | POS                                         | NEG               | NEG                                        | NEG                                       | NEG                     |
| Riyadh-2775605                                           | POS                                                   | POS                                       | POS                                                             | NEG                                         | NEG    | NEG                               | POS                                       | POS    | POS                                         | NEG               | NEG                                        | NEG                                       | NEG                     |
| Riyadh-2781996-2                                         | POS                                                   | POS                                       | POS                                                             | NEG                                         | NEG    | NEG                               | POS                                       | POS    | POS                                         | NEG               | NEG                                        | NEG                                       | NEG                     |
| Riyadh-2822783-2                                         | POS                                                   | POS                                       | POS                                                             | NEG                                         | NEG    | NEG                               | POS                                       | POS    | POS                                         | NEG               | NEG                                        | NEG                                       | NEG                     |
| Riyadh-2765601                                           | POS                                                   | POS                                       | POS                                                             | NEG                                         | NEG    | NEG                               | POS                                       | POS    | POS                                         | NEG               | NEG                                        | NEG                                       | NEG                     |
| Riyadh-3036074                                           | POS                                                   | POS                                       | POS                                                             | NEG                                         | NEG    | NEG                               | POS                                       | POS    | POS                                         | NEG               | NEG                                        | NEG                                       | NEG                     |
| Riyadh-3053099                                           | POS                                                   | POS                                       | POS                                                             | NEG                                         | NEG    | NEG                               | POS                                       | POS    | POS                                         | NEG               | NEG                                        | NEG                                       | NEG                     |
| Riyadh-3055366                                           | POS                                                   | POS                                       | POS                                                             | NEG                                         | NEG    | NEG                               | POS                                       | POS    | POS                                         | NEG               | NEG                                        | NEG                                       | NEG                     |
| Riyadh-3082712                                           | POS                                                   | POS                                       | POS                                                             | NEG                                         | NEG    | NEG                               | POS                                       | POS    | POS                                         | NEG               | NEG                                        | NEG                                       | NEG                     |
| Riyadh-3087502                                           | POS                                                   | POS                                       | POS                                                             | NEG                                         | NEG    | NEG                               | POS                                       | POS    | POS                                         | NEG               | NEG                                        | NEG                                       | NEG                     |
| Riyadh-6                                                 | POS                                                   | POS                                       | POS                                                             | NEG                                         | NEG    | NEG                               | POS                                       | POS    | POS                                         | NEG               | NEG                                        | NEG                                       | NEG                     |
| Riyadh-7                                                 | POS                                                   | POS                                       | POS                                                             | NEG                                         | NEG    | NEG                               | POS                                       | POS    | POS                                         | NEG               | NEG                                        | NEG                                       | NEG                     |
| Riyadh-8                                                 | POS                                                   | POS                                       | POS                                                             | NEG                                         | NEG    | NEG                               | POS                                       | POS    | POS                                         | NEG               | NEG                                        | NEG                                       | NEG                     |
| <b>CC30-MRSA-IV [PVL+], Southwest Pacific Clone</b>      |                                                       |                                           |                                                                 |                                             |        |                                   |                                           |        |                                             |                   |                                            |                                           |                         |
| Riyadh-10                                                | POS                                                   | POS                                       | POS                                                             | NEG                                         | NEG    | NEG                               | POS                                       | POS    | POS                                         | NEG               | NEG                                        | NEG                                       | NEG                     |
| Riyadh_IC_123                                            | POS                                                   | POS                                       | POS                                                             | NEG                                         | NEG    | NEG                               | POS                                       | POS    | POS                                         | NEG               | NEG                                        | NEG                                       | NEG                     |
| Riyadh-3080713                                           | POS                                                   | POS                                       | POS                                                             | NEG                                         | NEG    | NEG                               | POS                                       | POS    | POS                                         | NEG               | NEG                                        | NEG                                       | NEG                     |
| Riyadh-2803856                                           | POS                                                   | POS                                       | POS                                                             | NEG                                         | NEG    | NEG                               | POS                                       | POS    | POS                                         | NEG               | NEG                                        | NEG                                       | NEG                     |
| Riyadh-2817276-1                                         | POS                                                   | POS                                       | POS                                                             | NEG                                         | NEG    | NEG                               | POS                                       | POS    | POS                                         | NEG               | NEG                                        | NEG                                       | AMB                     |
| Riyadh-2817571-2                                         | POS                                                   | POS                                       | POS                                                             | NEG                                         | NEG    | NEG                               | POS                                       | POS    | POS                                         | NEG               | NEG                                        | NEG                                       | NEG                     |
| Riyadh-3033868                                           | POS                                                   | POS                                       | POS                                                             | NEG                                         | NEG    | NEG                               | POS                                       | POS    | POS                                         | NEG               | NEG                                        | NEG                                       | NEG                     |
| Riyadh-2550106                                           | POS                                                   | POS                                       | POS                                                             | NEG                                         | NEG    | NEG                               | POS                                       | POS    | POS                                         | NEG               | NEG                                        | NEG                                       | NEG                     |
| Riyadh-3095056-2                                         | POS                                                   | POS                                       | POS                                                             | NEG                                         | NEG    | NEG                               | POS                                       | POS    | POS                                         | NEG               | NEG                                        | NEG                                       | NEG                     |
| Riyadh-2819899                                           | POS                                                   | POS                                       | POS                                                             | NEG                                         | NEG    | NEG                               | POS                                       | POS    | POS                                         | NEG               | NEG                                        | NEG                                       | NEG                     |
| Riyadh-2821805                                           | POS                                                   | POS                                       | POS                                                             | NEG                                         | NEG    | NEG                               | POS                                       | POS    | POS                                         | NEG               | NEG                                        | NEG                                       | NEG                     |
| Riyadh-3013928                                           | POS                                                   | POS                                       | POS                                                             | NEG                                         | NEG    | NEG                               | POS                                       | POS    | POS                                         | NEG               | NEG                                        | NEG                                       | NEG                     |
| Riyadh-3029402                                           | POS                                                   | POS                                       | POS                                                             | NEG                                         | NEG    | NEG                               | POS                                       | POS    | POS                                         | NEG               | NEG                                        | NEG                                       | NEG                     |
| <b>CC45/agr IV-MRSA-IV, WA MRSA-23</b>                   |                                                       |                                           |                                                                 |                                             |        |                                   |                                           |        |                                             |                   |                                            |                                           |                         |
| Riyadh-3081378-1                                         | POS                                                   | POS                                       | POS                                                             | NEG                                         | NEG    | NEG                               | AMB                                       | POS    | POS                                         | NEG               | NEG                                        | NEG                                       | NEG                     |
| <b>CC80-MRSA-IV</b>                                      |                                                       |                                           |                                                                 |                                             |        |                                   |                                           |        |                                             |                   |                                            |                                           |                         |
| Riyadh-3107635                                           | POS                                                   | POS                                       | POS                                                             | NEG                                         | NEG    | NEG                               | POS                                       | POS    | POS                                         | NEG               | NEG                                        | NEG                                       | NEG                     |
| Riyadh-2987458                                           | POS                                                   | POS                                       | POS                                                             | NEG                                         | NEG    | NEG                               | POS                                       | POS    | POS                                         | NEG               | NEG                                        | NEG                                       | NEG                     |
| <b>CC80-MRSA-IV [PVL+], European caMRSA Clone</b>        |                                                       |                                           |                                                                 |                                             |        |                                   |                                           |        |                                             |                   |                                            |                                           |                         |
| Riyadh-2988048                                           | POS                                                   | POS                                       | POS                                                             | NEG                                         | NEG    | NEG                               | POS                                       | POS    | POS                                         | NEG               | NEG                                        | NEG                                       | NEG                     |
| Riyadh-2990585-2                                         | POS                                                   | POS                                       | POS                                                             | NEG                                         | NEG    | NEG                               | POS                                       | POS    | POS                                         | NEG               | NEG                                        | NEG                                       | NEG                     |
| Riyadh-2990585-1                                         | POS                                                   | POS                                       | POS                                                             | NEG                                         | NEG    | NEG                               | POS                                       | POS    | POS                                         | NEG               | NEG                                        | NEG                                       | NEG                     |
| Riyadh-2826033                                           | POS                                                   | POS                                       | POS                                                             | NEG                                         | NEG    | NEG                               | POS                                       | POS    | POS                                         | NEG               | NEG                                        | NEG                                       | NEG                     |
| Riyadh-1601562                                           | POS                                                   | POS                                       | POS                                                             | NEG                                         | NEG    | NEG                               | POS                                       | POS    | POS                                         | NEG               | NEG                                        | NEG                                       | NEG                     |
| Riyadh-2569940                                           | POS                                                   | POS                                       | POS                                                             | NEG                                         | NEG    | NEG                               | POS                                       | POS    | POS                                         | NEG               | NEG                                        | NEG                                       | NEG                     |
| Riyadh-2571692                                           | POS                                                   | POS                                       | POS                                                             | NEG                                         | NEG    | NEG                               | POS                                       | POS    | POS                                         | NEG               | NEG                                        | NEG                                       | NEG                     |
| Riyadh-2763029                                           | POS                                                   | POS                                       | POS                                                             | NEG                                         | NEG    | NEG                               | POS                                       | POS    | POS                                         | NEG               | NEG                                        | NEG                                       | NEG                     |
| Riyadh-2767096                                           | POS                                                   | POS                                       | POS                                                             | NEG                                         | NEG    | NEG                               | POS                                       | POS    | POS                                         | NEG               | NEG                                        | NEG                                       | NEG                     |
| Riyadh-2775130                                           | POS                                                   | POS                                       | POS                                                             | NEG                                         | NEG    | NEG                               | POS                                       | POS    | POS                                         | NEG               | NEG                                        | NEG                                       | NEG                     |
| Riyadh-2778256                                           | POS                                                   | POS                                       | POS                                                             | NEG                                         | NEG    | NEG                               | POS                                       | POS    | POS                                         | NEG               | NEG                                        | NEG                                       | NEG                     |
| Riyadh-2817505                                           | POS                                                   | POS                                       | POS                                                             | NEG                                         | NEG    | NEG                               | POS                                       | POS    | POS                                         | NEG               | NEG                                        | NEG                                       | NEG                     |
| Riyadh-3024912                                           | POS                                                   | POS                                       | POS                                                             | NEG                                         | NEG    | NEG                               | POS                                       | POS    | POS                                         | NEG               | NEG                                        | NEG                                       | NEG                     |
| Riyadh-2786590                                           | POS                                                   | POS                                       | POS                                                             | NEG                                         | NEG    | NEG                               | POS                                       | POS    | POS                                         | NEG               | NEG                                        | NEG                                       | NEG                     |
| Riyadh-3292034                                           | POS                                                   | POS                                       | POS                                                             | NEG                                         | NEG    | NEG                               | POS                                       | POS    | POS                                         | NEG               | NEG                                        | NEG                                       | NEG                     |
| Riyadh-3                                                 | POS                                                   | POS                                       | POS                                                             | NEG                                         | NEG    | NEG                               | POS                                       | POS    | POS                                         | NEG               | NEG                                        | NEG                                       | NEG                     |
| Riyadh-5                                                 | POS                                                   | POS                                       | POS                                                             | NEG                                         | NEG    | NEG                               | POS                                       | POS    | POS                                         | NEG               | NEG                                        | NEG                                       | NEG                     |
| Riyadh-2553167                                           | POS                                                   | POS                                       | POS                                                             | NEG                                         | NEG    | NEG                               | POS                                       | POS    | POS                                         | NEG               | NEG                                        | NEG                                       | NEG                     |
| Riyadh-3002592                                           | POS                                                   | POS                                       | POS                                                             | NEG                                         | NEG    | NEG                               | POS                                       | POS    | POS                                         | NEG               | NEG                                        | NEG                                       | NEG                     |
| <b>CC88-MRSA-IV [PVL+]</b>                               |                                                       |                                           |                                                                 |                                             |        |                                   |                                           |        |                                             |                   |                                            |                                           |                         |
| Riyadh-2736996                                           | POS                                                   | POS                                       | POS                                                             | NEG                                         | NEG    | NEG                               | POS                                       | POS    | POS                                         | NEG               | NEG                                        | NEG                                       | NEG                     |
| Riyadh-2942396                                           | POS                                                   | POS                                       | POS                                                             | NEG                                         |        |                                   |                                           |        |                                             |                   |                                            |                                           |                         |

|                                                          | METHICILLIN RESISTANCE AND SCCmec TYPING     |        |      |                           |                                 |                                                                        |                      |        |                                              | RESISTANCE : PENICILLINASE |                    |                                               |
|----------------------------------------------------------|----------------------------------------------|--------|------|---------------------------|---------------------------------|------------------------------------------------------------------------|----------------------|--------|----------------------------------------------|----------------------------|--------------------|-----------------------------------------------|
|                                                          | ccrA-3                                       | ccrB-3 | merA | merB                      | ccrAA<br>(MRSZA247)_pr<br>obe 1 | ccrAA<br>(MRSZA247)_pr<br>obe 2                                        | ccrC<br>(85<br>2082) | ccrA-4 | ccrB-4                                       | blaZ                       | blaI               | blaR                                          |
|                                                          | cassette chromosome<br>recombine genes A/B-3 |        |      | mercury resistance operon |                                 | cassette chromosome recombine genes<br>"ccrAA" (hypothetical) and ccrC |                      |        | cassette chromosome<br>recombine genes A/B-4 |                            | beta-<br>lactamase | beta<br>lactamase<br>repressor<br>(inhibitor) |
| <b>CC1-MRSA-IV&amp;SCCfus, WA MRSA-1/45</b>              |                                              |        |      |                           |                                 |                                                                        |                      |        |                                              |                            |                    |                                               |
| Riyadh-3108609                                           | NEG                                          | AMB    | NEG  | NEG                       | NEG                             | NEG                                                                    | NEG                  | NEG    | NEG                                          | POS                        | POS                | POS                                           |
| Riyadh-2913235                                           | NEG                                          | NEG    | NEG  | NEG                       | NEG                             | NEG                                                                    | NEG                  | NEG    | NEG                                          | POS                        | POS                | POS                                           |
| <b>CC1/ST772-MRSA-V [PVL+], "Bengal Bay Clone/WA I"</b>  |                                              |        |      |                           |                                 |                                                                        |                      |        |                                              |                            |                    |                                               |
| Riyadh-2819026                                           | NEG                                          | NEG    | NEG  | NEG                       | POS                             | POS                                                                    | POS                  | NEG    | NEG                                          | POS                        | POS                | POS                                           |
| <b>CC5-MRSA-IV, Paediatric clone</b>                     |                                              |        |      |                           |                                 |                                                                        |                      |        |                                              |                            |                    |                                               |
| Riyadh-2915327-1                                         | NEG                                          | NEG    | NEG  | NEG                       | NEG                             | NEG                                                                    | NEG                  | NEG    | NEG                                          | POS                        | POS                | POS                                           |
| Riyadh-2915327-2                                         | NEG                                          | NEG    | NEG  | NEG                       | NEG                             | NEG                                                                    | NEG                  | NEG    | NEG                                          | POS                        | POS                | POS                                           |
| Riyadh-2                                                 | NEG                                          | NEG    | NEG  | NEG                       | NEG                             | NEG                                                                    | NEG                  | NEG    | NEG                                          | POS                        | POS                | POS                                           |
| <b>CC5-MRSA-IV [PVL+], Paediatric clone</b>              |                                              |        |      |                           |                                 |                                                                        |                      |        |                                              |                            |                    |                                               |
| Riyadh-2986666                                           | NEG                                          | NEG    | NEG  | NEG                       | NEG                             | NEG                                                                    | NEG                  | NEG    | NEG                                          | POS                        | POS                | POS                                           |
| Riyadh-2913235                                           | NEG                                          | NEG    | NEG  | NEG                       | NEG                             | NEG                                                                    | NEG                  | NEG    | NEG                                          | POS                        | POS                | POS                                           |
| <b>CC5-MRSA-IVvar, "Maltese Clone"</b>                   |                                              |        |      |                           |                                 |                                                                        |                      |        |                                              |                            |                    |                                               |
| Riyadh-2983654                                           | POS                                          | NEG    | NEG  | NEG                       | NEG                             | NEG                                                                    | NEG                  | NEG    | NEG                                          | POS                        | POS                | POS                                           |
| Riyadh-4                                                 | POS                                          | NEG    | NEG  | NEG                       | NEG                             | NEG                                                                    | NEG                  | NEG    | NEG                                          | POS                        | POS                | POS                                           |
| Riyadh-2790233                                           | POS                                          | NEG    | NEG  | NEG                       | NEG                             | NEG                                                                    | NEG                  | NEG    | NEG                                          | NEG                        | NEG                | NEG                                           |
| <b>CC5-MRSA-V</b>                                        |                                              |        |      |                           |                                 |                                                                        |                      |        |                                              |                            |                    |                                               |
| Riyadh-2568944                                           | NEG                                          | NEG    | NEG  | NEG                       | POS                             | POS                                                                    | POS                  | NEG    | NEG                                          | NEG                        | NEG                | NEG                                           |
| <b>CC6-MRSA-IV, WA MRSA-51/66</b>                        |                                              |        |      |                           |                                 |                                                                        |                      |        |                                              |                            |                    |                                               |
| Riyadh-2556168                                           | NEG                                          | NEG    | NEG  | NEG                       | NEG                             | NEG                                                                    | NEG                  | NEG    | NEG                                          | POS                        | POS                | POS                                           |
| Riyadh-2824507                                           | NEG                                          | NEG    | NEG  | NEG                       | NEG                             | NEG                                                                    | NEG                  | NEG    | NEG                                          | POS                        | POS                | POS                                           |
| Riyadh-2990831                                           | NEG                                          | NEG    | NEG  | NEG                       | NEG                             | NEG                                                                    | NEG                  | NEG    | NEG                                          | POS                        | POS                | POS                                           |
| <b>CC9/ST239-MRSA-III, Vienna/Hungarian/Brazilian Cl</b> |                                              |        |      |                           |                                 |                                                                        |                      |        |                                              |                            |                    |                                               |
| Riyadh-9                                                 | POS                                          | POS    | NEG  | NEG                       | NEG                             | POS                                                                    | POS                  | NEG    | NEG                                          | POS                        | POS                | POS                                           |
| Riyadh-3028763                                           | POS                                          | POS    | NEG  | NEG                       | NEG                             | POS                                                                    | POS                  | NEG    | NEG                                          | POS                        | POS                | POS                                           |
| Riyadh-2817437                                           | POS                                          | POS    | NEG  | NEG                       | NEG                             | POS                                                                    | POS                  | AMB    | POS                                          | NEG                        | NEG                | POS                                           |
| Riyadh-2793706                                           | POS                                          | POS    | NEG  | NEG                       | NEG                             | POS                                                                    | POS                  | NEG    | NEG                                          | POS                        | POS                | POS                                           |
| Riyadh-2818797                                           | POS                                          | POS    | NEG  | NEG                       | NEG                             | POS                                                                    | POS                  | AMB    | POS                                          | NEG                        | NEG                | POS                                           |
| Riyadh-2822825                                           | POS                                          | POS    | NEG  | NEG                       | NEG                             | POS                                                                    | POS                  | AMB    | POS                                          | NEG                        | NEG                | POS                                           |
| Riyadh-2888905                                           | POS                                          | POS    | NEG  | NEG                       | NEG                             | POS                                                                    | POS                  | AMB    | POS                                          | NEG                        | NEG                | POS                                           |
| Riyadh-2888915                                           | POS                                          | POS    | NEG  | NEG                       | NEG                             | POS                                                                    | POS                  | AMB    | POS                                          | NEG                        | NEG                | POS                                           |
| Riyadh-2567782                                           | POS                                          | POS    | POS  | POS                       | NEG                             | NEG                                                                    | POS                  | NEG    | NEG                                          | POS                        | POS                | POS                                           |
| Riyadh-2891670                                           | POS                                          | POS    | POS  | POS                       | NEG                             | NEG                                                                    | POS                  | AMB    | POS                                          | NEG                        | NEG                | POS                                           |
| Riyadh-3006920                                           | POS                                          | POS    | POS  | POS                       | NEG                             | NEG                                                                    | POS                  | AMB    | POS                                          | NEG                        | NEG                | POS                                           |
| Riyadh-2817276-1                                         | POS                                          | POS    | POS  | POS                       | NEG                             | NEG                                                                    | POS                  | AMB    | POS                                          | NEG                        | NEG                | POS                                           |
| Riyadh-0295102                                           | POS                                          | POS    | POS  | POS                       | NEG                             | NEG                                                                    | POS                  | NEG    | NEG                                          | POS                        | POS                | POS                                           |
| Riyadh-2820597                                           | POS                                          | POS    | POS  | POS                       | NEG                             | AMB                                                                    | POS                  | NEG    | NEG                                          | POS                        | POS                | POS                                           |
| Riyadh-2822088                                           | POS                                          | POS    | POS  | POS                       | NEG                             | AMB                                                                    | POS                  | NEG    | NEG                                          | POS                        | POS                | POS                                           |
| Riyadh-3010092                                           | POS                                          | POS    | POS  | POS                       | NEG                             | NEG                                                                    | POS                  | NEG    | NEG                                          | POS                        | POS                | POS                                           |
| Riyadh-3022844                                           | POS                                          | POS    | POS  | POS                       | NEG                             | NEG                                                                    | POS                  | NEG    | NEG                                          | POS                        | POS                | POS                                           |
| Riyadh-3108214-2                                         | POS                                          | POS    | POS  | POS                       | NEG                             | NEG                                                                    | POS                  | NEG    | NEG                                          | POS                        | POS                | POS                                           |
| Riyadh-2823926                                           | POS                                          | POS    | POS  | POS                       | NEG                             | AMB                                                                    | POS                  | NEG    | NEG                                          | POS                        | POS                | POS                                           |
| Riyadh-1                                                 | POS                                          | POS    | POS  | POS                       | NEG                             | AMB                                                                    | POS                  | NEG    | NEG                                          | POS                        | POS                | POS                                           |
| Riyadh-2818388                                           | POS                                          | POS    | POS  | POS                       | NEG                             | AMB                                                                    | POS                  | NEG    | NEG                                          | POS                        | POS                | POS                                           |
| Riyadh-3112315                                           | POS                                          | POS    | POS  | POS                       | NEG                             | AMB                                                                    | POS                  | NEG    | NEG                                          | POS                        | POS                | POS                                           |
| <b>CC9/ST834-MRSA-(atypical SCCmec )</b>                 |                                              |        |      |                           |                                 |                                                                        |                      |        |                                              |                            |                    |                                               |
| Riyadh-3103521                                           | NEG                                          | NEG    | NEG  | NEG                       | NEG                             | NEG                                                                    | NEG                  | NEG    | NEG                                          | POS                        | POS                | POS                                           |
| <b>CC22-MRSA-IV, Barnim/UK-EMRSA-15</b>                  |                                              |        |      |                           |                                 |                                                                        |                      |        |                                              |                            |                    |                                               |
| Riyadh-2553350                                           | NEG                                          | NEG    | NEG  | NEG                       | NEG                             | NEG                                                                    | NEG                  | NEG    | NEG                                          | POS                        | POS                | POS                                           |
| Riyadh-2571758                                           | NEG                                          | NEG    | NEG  | NEG                       | NEG                             | NEG                                                                    | NEG                  | NEG    | NEG                                          | POS                        | POS                | POS                                           |
| Riyadh-3029203                                           | NEG                                          | NEG    | NEG  | NEG                       | NEG                             | NEG                                                                    | NEG                  | NEG    | NEG                                          | POS                        | POS                | POS                                           |
| Riyadh-3039785                                           | NEG                                          | NEG    | NEG  | NEG                       | NEG                             | NEG                                                                    | NEG                  | NEG    | NEG                                          | POS                        | POS                | POS                                           |
| Riyadh-3105594                                           | NEG                                          | NEG    | NEG  | NEG                       | NEG                             | NEG                                                                    | NEG                  | NEG    | NEG                                          | POS                        | POS                | POS                                           |
| Riyadh_IC_204-2                                          | NEG                                          | NEG    | NEG  | NEG                       | NEG                             | NEG                                                                    | NEG                  | NEG    | NEG                                          | POS                        | POS                | POS                                           |
| Riyadh-3003974                                           | NEG                                          | NEG    | NEG  | NEG                       | NEG                             | NEG                                                                    | NEG                  | NEG    | NEG                                          | POS                        | POS                | POS                                           |
| Riyadh_IC_067                                            | NEG                                          | NEG    | NEG  | NEG                       | NEG                             | NEG                                                                    | NEG                  | NEG    | NEG                                          | POS                        | POS                | POS                                           |
| Riyadh-2988627                                           | NEG                                          | NEG    | NEG  | NEG                       | NEG                             | NEG                                                                    | NEG                  | NEG    | NEG                                          | POS                        | POS                | POS                                           |
| Riyadh-3112581                                           | NEG                                          | NEG    | NEG  | NEG                       | NEG                             | NEG                                                                    | NEG                  | NEG    | NEG                                          | POS                        | POS                | POS                                           |
| <b>CC22-MRSA-IV [PVL+]</b>                               |                                              |        |      |                           |                                 |                                                                        |                      |        |                                              |                            |                    |                                               |
| Riyadh-2781996-1                                         | NEG                                          | NEG    | NEG  | NEG                       | NEG                             | NEG                                                                    | NEG                  | NEG    | NEG                                          | POS                        | POS                | AMB                                           |
| Riyadh-3103432                                           | NEG                                          | NEG    | NEG  | NEG                       | NEG                             | NEG                                                                    | NEG                  | NEG    | NEG                                          | POS                        | POS                | AMB                                           |
| Riyadh-3026502                                           | NEG                                          | NEG    | NEG  | NEG                       | NEG                             | NEG                                                                    | NEG                  | NEG    | NEG                                          | POS                        | POS                | AMB                                           |
| Riyadh-3081378-2                                         | NEG                                          | NEG    | NEG  | NEG                       | NEG                             | NEG                                                                    | NEG                  | NEG    | NEG                                          | POS                        | POS                | AMB                                           |
| Riyadh_IC_185                                            | NEG                                          | NEG    | NEG  | NEG                       | NEG                             | NEG                                                                    | NEG                  | NEG    | NEG                                          | POS                        | POS                | POS                                           |
| Riyadh_IC_204-1                                          | NEG                                          | NEG    | NEG  | NEG                       | NEG                             | NEG                                                                    | NEG                  | NEG    | NEG                                          | POS                        | POS                | POS                                           |
| Riyadh-3159371                                           | NEG                                          | NEG    | NEG  | NEG                       | NEG                             | NEG                                                                    | NEG                  | NEG    | NEG                                          | POS                        | POS                | POS                                           |
| Riyadh-2753975                                           | NEG                                          | NEG    | NEG  | NEG                       | NEG                             | NEG                                                                    | NEG                  | NEG    | NEG                                          | POS                        | POS                | POS                                           |
| Riyadh-2775605                                           | NEG                                          | NEG    | NEG  | NEG                       | NEG                             | NEG                                                                    | NEG                  | NEG    | NEG                                          | POS                        | POS                | AMB                                           |
| Riyadh-2781996-2                                         | NEG                                          | NEG    | NEG  | NEG                       | NEG                             | NEG                                                                    | NEG                  | NEG    | NEG                                          | POS                        | POS                | AMB                                           |
| Riyadh-2823783-2                                         | NEG                                          | NEG    | NEG  | NEG                       | NEG                             | NEG                                                                    | NEG                  | NEG    | NEG                                          | POS                        | POS                | POS                                           |
| Riyadh-2876601                                           | NEG                                          | NEG    | NEG  | NEG                       | NEG                             | NEG                                                                    | NEG                  | NEG    | NEG                                          | POS                        | POS                | POS                                           |
| Riyadh-3036074                                           | NEG                                          | NEG    | NEG  | NEG                       | NEG                             | NEG                                                                    | NEG                  | NEG    | NEG                                          | POS                        | POS                | POS                                           |
| Riyadh-3053099                                           | NEG                                          | NEG    | NEG  | NEG                       | NEG                             | NEG                                                                    | NEG                  | NEG    | NEG                                          | POS                        | POS                | POS                                           |
| Riyadh-3055366                                           | NEG                                          | NEG    | NEG  | NEG                       | NEG                             | NEG                                                                    | NEG                  | NEG    | NEG                                          | POS                        | POS                | POS                                           |
| Riyadh-3082712                                           | NEG                                          | NEG    | NEG  | NEG                       | NEG                             | NEG                                                                    | NEG                  | NEG    | NEG                                          | POS                        | POS                | POS                                           |
| Riyadh-3087502                                           | NEG                                          | NEG    | NEG  | NEG                       | NEG                             | NEG                                                                    | NEG                  | NEG    | NEG                                          | POS                        | POS                | AMB                                           |
| Riyadh-6                                                 | NEG                                          | NEG    | NEG  | NEG                       | NEG                             | NEG                                                                    | NEG                  | NEG    | NEG                                          | POS                        | POS                | POS                                           |
| Riyadh-7                                                 | NEG                                          | NEG    | NEG  | NEG                       | NEG                             | NEG                                                                    | NEG                  | NEG    | NEG                                          | POS                        | POS                | POS                                           |
| Riyadh-8                                                 | NEG                                          | NEG    | NEG  | NEG                       | NEG                             | NEG                                                                    | NEG                  | NEG    | NEG                                          | POS                        | POS                | POS                                           |
| <b>CC30-MRSA-IV [PVL+], Southwest Pacific Clone</b>      |                                              |        |      |                           |                                 |                                                                        |                      |        |                                              |                            |                    |                                               |
| Riyadh-10                                                | NEG                                          | NEG    | NEG  | NEG                       | NEG                             | NEG                                                                    | NEG                  | NEG    | NEG                                          | NEG                        | NEG                | NEG                                           |
| Riyadh_IC_123                                            | NEG                                          | NEG    | NEG  | NEG                       | NEG                             | NEG                                                                    | NEG                  | NEG    | NEG                                          | POS                        | POS                | POS                                           |
| Riyadh-3080713                                           | NEG                                          | NEG    | NEG  | NEG                       | NEG                             | NEG                                                                    | NEG                  | NEG    | NEG                                          | POS                        | POS                | POS                                           |
| Riyadh-2803856                                           | NEG                                          | NEG    | NEG  | NEG                       | NEG                             | NEG                                                                    | NEG                  | NEG    | NEG                                          | POS                        | POS                | POS                                           |
| Riyadh-2817276-1                                         | AMB                                          | NEG    | NEG  | NEG                       | NEG                             | NEG                                                                    | NEG                  | NEG    | NEG                                          | POS                        | POS                | POS                                           |
| Riyadh-2817571-2                                         | NEG                                          | NEG    | NEG  | NEG                       | NEG                             | NEG                                                                    | NEG                  | NEG    | NEG                                          | POS                        | POS                | POS                                           |
| Riyadh-3033868                                           | NEG                                          | NEG    | NEG  | NEG                       | NEG                             | NEG                                                                    | NEG                  | NEG    | NEG                                          | POS                        | POS                | POS                                           |
| Riyadh-2550106                                           | NEG                                          | NEG    | NEG  | NEG                       | NEG                             | NEG                                                                    | NEG                  | NEG    | NEG                                          | POS                        | POS                | POS                                           |
| Riyadh-3095056-2                                         | NEG                                          | NEG    | NEG  | NEG                       | NEG                             | NEG                                                                    | NEG                  | NEG    | NEG                                          | POS                        | POS                | POS                                           |
| Riyadh-2819899                                           | NEG                                          | NEG    | NEG  | NEG                       | NEG                             | NEG                                                                    | NEG                  | NEG    | NEG                                          | POS                        | POS                | POS                                           |
| Riyadh-2821805                                           | NEG                                          | NEG    | NEG  | NEG                       | NEG                             | NEG                                                                    | NEG                  | NEG    | NEG                                          | POS                        | POS                | POS                                           |
| Riyadh-3013928                                           | NEG                                          | NEG    | NEG  | NEG                       | NEG                             | NEG                                                                    | NEG                  | NEG    | NEG                                          | POS                        | POS                | POS                                           |
| Riyadh-3029402                                           | NEG                                          | NEG    | NEG  | NEG                       | NEG                             | NEG                                                                    | NEG                  | NEG    | NEG                                          | POS                        | POS                | POS                                           |
| <b>CC45/agr IV-MRSA-IV, WA MRSA-23</b>                   |                                              |        |      |                           |                                 |                                                                        |                      |        |                                              |                            |                    |                                               |
| Riyadh-3081378-1                                         | NEG                                          | NEG    | NEG  | NEG                       | NEG                             | NEG                                                                    | NEG                  | NEG    | NEG                                          | POS                        | POS                | POS                                           |
| <b>CC80-MRSA-IV</b>                                      |                                              |        |      |                           |                                 |                                                                        |                      |        |                                              |                            |                    |                                               |
| Riyadh-3107635                                           | NEG                                          | NEG    | NEG  | NEG                       | NEG                             | NEG                                                                    | NEG                  | NEG    | NEG                                          | POS                        | POS                | POS                                           |
| Riyadh-2987458                                           | NEG                                          | NEG    | NEG  | NEG                       | NEG                             | NEG                                                                    | NEG                  | NEG    | NEG                                          | POS                        | POS                | POS                                           |
| <b>CC80-MRSA-IV [PVL+], European caMRSA Clone</b>        |                                              |        |      |                           |                                 |                                                                        |                      |        |                                              |                            |                    |                                               |
| Riyadh-2988048                                           | NEG                                          | NEG    | NEG  | NEG                       | NEG                             | NEG                                                                    | NEG                  | NEG    | NEG                                          | NEG                        | NEG                | NEG                                           |
| Riyadh-2990585-2                                         | NEG                                          | NEG    | NEG  | NEG                       | NEG                             | NEG                                                                    | NEG                  | NEG    | NEG                                          | NEG                        | NEG                | NEG                                           |
| Riyadh-2990585-1                                         | NEG                                          | NEG    | NEG  | NEG                       | NEG                             | NEG                                                                    | NEG                  | NEG    | NEG                                          | POS                        | POS                | POS                                           |
| Riyadh-2826033                                           | NEG                                          | NEG    | NEG  | NEG                       | NEG                             | NEG                                                                    | NEG                  | NEG    | NEG                                          | NEG                        | NEG                | NEG                                           |
| Riyadh-1601562                                           | NEG                                          | NEG    | NEG  | NEG                       | NEG                             | NEG                                                                    | NEG                  | NEG    | NEG                                          | POS                        | POS                | POS                                           |
| Riyadh-2569940                                           | NEG                                          | NEG    | NEG  | NEG                       | NEG                             | NEG                                                                    | NEG                  | NEG    | NEG                                          | POS                        | POS                | POS                                           |
| Riyadh-2571692                                           | NEG                                          | NEG    | NEG  | NEG                       | NEG                             | NEG                                                                    | NEG                  | NEG    | NEG                                          | POS                        | POS                | POS                                           |
| Riyadh-2763029                                           | NEG                                          | NEG    | NEG  | NEG                       | NEG                             | NEG                                                                    | NEG                  | NEG    | NEG                                          | POS                        | POS                | POS                                           |
| Riyadh-2767096                                           | NEG                                          | NEG    | NEG  | NEG                       | NEG                             | NEG                                                                    | NEG                  | NEG    | NEG                                          | POS                        | POS                | POS                                           |
| Riyadh-2775130                                           | NEG                                          | NEG    | NEG  | NEG                       | NEG                             | NEG                                                                    | NEG                  | NEG    | NEG                                          | POS                        | POS                | POS                                           |
| Riyadh-2778256                                           | NEG                                          | NEG    | NEG  | NEG                       | NEG                             | NEG                                                                    | NEG                  | NEG    | NEG                                          | POS                        | POS                | POS                                           |
| Riyadh-2817505                                           | NEG                                          | NEG    | NEG  | NEG                       | NEG                             | NEG                                                                    | NEG                  | NEG    | NEG                                          | POS                        | POS                | POS                                           |
| Riyadh-3024912                                           | NEG                                          | NEG    | NEG  | NEG                       | NEG                             | NEG                                                                    | NEG                  | NEG    | NEG                                          | POS                        | POS                | POS                                           |
| Riyadh-2786690                                           | NEG                                          | NEG    | NEG  | NEG                       | NEG                             | NEG                                                                    | NEG                  | NEG    | NEG                                          | POS                        | POS                | POS                                           |
| Riyadh-3292034                                           | NEG                                          | NEG    | NEG  | NEG                       | NEG                             | NEG                                                                    | NEG                  | NEG    | NEG                                          | POS                        | POS                | POS                                           |
| Riyadh-3                                                 | NEG                                          | NEG    | NEG  | NEG                       | NEG                             | NEG                                                                    | NEG                  | NEG    | NEG                                          | POS                        | POS                | POS                                           |
| Riyadh-5                                                 | NEG                                          | NEG    | NEG  | NEG                       | NEG                             | NEG                                                                    | NEG                  | NEG    | NEG                                          | POS                        | POS                | POS                                           |
| Riyadh-2553167                                           | NEG                                          | NEG    | NEG  | NEG                       | NEG                             | NEG                                                                    | NEG                  | NEG    | NEG                                          | POS                        | POS                | POS                                           |
| Riyadh-3002592                                           | NEG                                          | NEG    | NEG  | NEG                       | NEG                             | NEG                                                                    | NEG                  | NEG    | NEG                                          | POS                        | POS                | POS                                           |
| <b>CC88-MRSA-IV [PVL+]</b>                               |                                              |        |      |                           |                                 |                                                                        |                      |        |                                              |                            |                    |                                               |
| Riyadh-2736996                                           | NEG                                          | NEG    | NEG  | NEG                       | NEG                             | NEG                                                                    | NEG                  | NEG    | NEG                                          | POS                        | POS                | POS                                           |
| Riyadh-2942396                                           | NEG                                          | NEG    | NEG  | NEG                       | NEG                             | NEG                                                                    | NEG                  | NEG    | NEG                                          | POS                        | POS                | POS                                           |
| Riyadh-3105391                                           | NEG                                          | NEG    | NEG  | NEG                       | NEG                             | NEG                                                                    | NEG                  | NEG    | NEG                                          | POS                        | POS                | POS                                           |
| <b>CC97-MRSA-V</b>                                       |                                              |        |      |                           |                                 |                                                                        |                      |        |                                              |                            |                    |                                               |
| Riyadh-0297622                                           | NEG                                          | NEG    | NEG  | NEG                       | NEG                             | POS                                                                    | POS                  | NEG    | NEG                                          | POS                        | POS                | POS                                           |
| Riyadh-3025471                                           | NEG                                          | NEG    | NEG  | NEG                       | POS                             | POS                                                                    | POS                  | NEG    | NEG                                          | POS                        | POS                | POS                                           |





|                                                          | RESISTANCE : MISCELLANEOUS GENES |                                     |                          |              | RESISTANCE : EFFLUX SYSTEMS                       |                                                   |             |               |                        | RESISTANCE : GLYCOPEPTIDES |                            |                                                             |                                             |
|----------------------------------------------------------|----------------------------------|-------------------------------------|--------------------------|--------------|---------------------------------------------------|---------------------------------------------------|-------------|---------------|------------------------|----------------------------|----------------------------|-------------------------------------------------------------|---------------------------------------------|
|                                                          | cfr                              | foxA                                | fosB                     | fosB-plasmid | qacA                                              | qacC (total)                                      | qacC (cons) | qacC (equine) | qacC (SA5, Ssap, ST94) | tetEfflux                  | vanA                       | vanB                                                        | vanZ                                        |
|                                                          | 23S rRNA methyltransferase       | chloramphenicol/lorfenicol exporter | metallothiol transferase |              | quaternary ammonium compound resistance protein A | quaternary ammonium compound resistance protein C |             |               |                        | Transport-/Efflux protein  | vancomycin resistance gene | vancomycin resistance gene from enterococci and Clostridium | teloplanin resistance gene from enterococci |
| <b>CC1-MRSA-IV&amp;SCCFus, WA MRSA-1/45</b>              |                                  |                                     |                          |              |                                                   |                                                   |             |               |                        | POS                        |                            |                                                             |                                             |
| Riyadh-3108609                                           | NEG                              | NEG                                 | NEG                      | NEG          | NEG                                               | NEG                                               | NEG         | NEG           | NEG                    | POS                        | NEG                        | NEG                                                         | NEG                                         |
| Riyadh-2913235                                           | NEG                              | NEG                                 | NEG                      | NEG          | NEG                                               | NEG                                               | NEG         | NEG           | NEG                    | POS                        | NEG                        | NEG                                                         | NEG                                         |
| <b>CC1/ST772-MRSA-V [PVL+], "Bengal Bay Clone/WA I"</b>  |                                  |                                     | POS                      | AMB          | NEG                                               | NEG                                               | NEG         | NEG           | NEG                    | POS                        | NEG                        | NEG                                                         | NEG                                         |
| Riyadh-2819026                                           | NEG                              | NEG                                 | POS                      | AMB          | NEG                                               | NEG                                               | NEG         | NEG           | NEG                    | POS                        | NEG                        | NEG                                                         | NEG                                         |
| <b>CC5-MRSA-IV, Paediatric clone</b>                     |                                  |                                     | POS                      | NEG          | NEG                                               | NEG                                               | NEG         | NEG           | NEG                    | POS                        | NEG                        | NEG                                                         | NEG                                         |
| Riyadh-2915327-1                                         | NEG                              | NEG                                 | POS                      | NEG          | NEG                                               | NEG                                               | NEG         | NEG           | NEG                    | POS                        | NEG                        | NEG                                                         | NEG                                         |
| Riyadh-2915327-2                                         | NEG                              | NEG                                 | POS                      | NEG          | NEG                                               | NEG                                               | NEG         | NEG           | NEG                    | POS                        | NEG                        | NEG                                                         | NEG                                         |
| Riyadh-2                                                 | NEG                              | NEG                                 | POS                      | NEG          | NEG                                               | NEG                                               | NEG         | NEG           | NEG                    | POS                        | NEG                        | NEG                                                         | NEG                                         |
| <b>CC5-MRSA-IV [PVL+], Paediatric clone</b>              |                                  |                                     | POS                      | AMB          | NEG                                               | NEG                                               | NEG         | NEG           | NEG                    | POS                        | NEG                        | NEG                                                         | NEG                                         |
| Riyadh-2986666                                           | NEG                              | NEG                                 | POS                      | AMB          | NEG                                               | NEG                                               | NEG         | NEG           | NEG                    | POS                        | NEG                        | NEG                                                         | NEG                                         |
| Riyadh-2913235                                           | NEG                              | NEG                                 | POS                      | AMB          | NEG                                               | NEG                                               | NEG         | NEG           | NEG                    | POS                        | NEG                        | NEG                                                         | NEG                                         |
| <b>CC5-MRSA-IVvar, "Maltese Clone"</b>                   |                                  |                                     | POS                      | NEG          | NEG                                               | NEG                                               | NEG         | NEG           | NEG                    | POS                        | NEG                        | NEG                                                         | NEG                                         |
| Riyadh-2983654                                           | NEG                              | NEG                                 | POS                      | NEG          | NEG                                               | NEG                                               | NEG         | NEG           | NEG                    | POS                        | NEG                        | NEG                                                         | NEG                                         |
| Riyadh-4                                                 | NEG                              | NEG                                 | POS                      | NEG          | NEG                                               | NEG                                               | NEG         | NEG           | NEG                    | POS                        | NEG                        | NEG                                                         | NEG                                         |
| Riyadh-2790233                                           | NEG                              | NEG                                 | POS                      | NEG          | NEG                                               | NEG                                               | NEG         | NEG           | NEG                    | POS                        | NEG                        | NEG                                                         | NEG                                         |
| <b>CC5-MRSA-V</b>                                        |                                  |                                     | POS                      | NEG          | NEG                                               | NEG                                               | NEG         | NEG           | NEG                    | POS                        | NEG                        | NEG                                                         | NEG                                         |
| Riyadh-2568944                                           | NEG                              | NEG                                 | POS                      | NEG          | NEG                                               | NEG                                               | NEG         | NEG           | NEG                    | POS                        | NEG                        | NEG                                                         | NEG                                         |
| <b>CC6-MRSA-IV, WA MRSA-51/66</b>                        |                                  |                                     | POS                      | NEG          | NEG                                               | NEG                                               | NEG         | NEG           | NEG                    | POS                        | NEG                        | NEG                                                         | NEG                                         |
| Riyadh-2556168                                           | NEG                              | NEG                                 | POS                      | NEG          | NEG                                               | NEG                                               | NEG         | NEG           | NEG                    | POS                        | NEG                        | NEG                                                         | NEG                                         |
| Riyadh-2824507                                           | NEG                              | NEG                                 | POS                      | NEG          | NEG                                               | NEG                                               | NEG         | NEG           | NEG                    | POS                        | NEG                        | NEG                                                         | NEG                                         |
| Riyadh-3990831                                           | NEG                              | NEG                                 | POS                      | NEG          | NEG                                               | NEG                                               | NEG         | NEG           | NEG                    | POS                        | NEG                        | NEG                                                         | NEG                                         |
| <b>CC9/ST239-MRSA-III, Vienna/Hungarian/Brazilian Cl</b> |                                  |                                     | POS                      | AMB          | NEG                                               | NEG                                               | NEG         | NEG           | NEG                    | POS                        | NEG                        | NEG                                                         | NEG                                         |
| Riyadh-5                                                 | NEG                              | NEG                                 | POS                      | AMB          | NEG                                               | NEG                                               | NEG         | NEG           | NEG                    | POS                        | NEG                        | NEG                                                         | NEG                                         |
| Riyadh-3028763                                           | NEG                              | NEG                                 | POS                      | AMB          | NEG                                               | NEG                                               | NEG         | NEG           | NEG                    | POS                        | NEG                        | NEG                                                         | NEG                                         |
| Riyadh-2817437                                           | NEG                              | NEG                                 | POS                      | AMB          | NEG                                               | NEG                                               | NEG         | NEG           | NEG                    | POS                        | NEG                        | NEG                                                         | NEG                                         |
| Riyadh-2793706                                           | NEG                              | NEG                                 | POS                      | AMB          | NEG                                               | NEG                                               | NEG         | NEG           | NEG                    | POS                        | NEG                        | NEG                                                         | NEG                                         |
| Riyadh-2818797                                           | NEG                              | NEG                                 | POS                      | AMB          | NEG                                               | NEG                                               | NEG         | NEG           | NEG                    | POS                        | NEG                        | NEG                                                         | NEG                                         |
| Riyadh-2822825                                           | NEG                              | NEG                                 | POS                      | AMB          | NEG                                               | NEG                                               | NEG         | NEG           | NEG                    | POS                        | NEG                        | NEG                                                         | NEG                                         |
| Riyadh-2888905                                           | NEG                              | NEG                                 | POS                      | AMB          | NEG                                               | NEG                                               | NEG         | NEG           | NEG                    | POS                        | NEG                        | NEG                                                         | NEG                                         |
| Riyadh-2888915                                           | NEG                              | NEG                                 | POS                      | AMB          | NEG                                               | NEG                                               | NEG         | NEG           | NEG                    | POS                        | NEG                        | NEG                                                         | NEG                                         |
| Riyadh-2567782                                           | NEG                              | NEG                                 | POS                      | AMB          | NEG                                               | NEG                                               | NEG         | NEG           | NEG                    | POS                        | NEG                        | NEG                                                         | NEG                                         |
| Riyadh-2891670                                           | NEG                              | NEG                                 | POS                      | AMB          | NEG                                               | NEG                                               | NEG         | NEG           | NEG                    | POS                        | NEG                        | NEG                                                         | NEG                                         |
| Riyadh-3006920                                           | NEG                              | NEG                                 | POS                      | AMB          | NEG                                               | NEG                                               | NEG         | NEG           | NEG                    | POS                        | NEG                        | NEG                                                         | NEG                                         |
| Riyadh-2817276-1                                         | NEG                              | NEG                                 | POS                      | AMB          | NEG                                               | NEG                                               | NEG         | NEG           | NEG                    | POS                        | NEG                        | NEG                                                         | NEG                                         |
| Riyadh-0295102                                           | NEG                              | NEG                                 | POS                      | AMB          | NEG                                               | NEG                                               | NEG         | NEG           | NEG                    | POS                        | NEG                        | NEG                                                         | NEG                                         |
| Riyadh-2820597                                           | NEG                              | NEG                                 | POS                      | AMB          | NEG                                               | NEG                                               | NEG         | NEG           | NEG                    | POS                        | NEG                        | NEG                                                         | NEG                                         |
| Riyadh-2822088                                           | NEG                              | NEG                                 | POS                      | AMB          | NEG                                               | NEG                                               | NEG         | NEG           | NEG                    | POS                        | NEG                        | NEG                                                         | NEG                                         |
| Riyadh-3010092                                           | NEG                              | NEG                                 | POS                      | AMB          | NEG                                               | NEG                                               | NEG         | NEG           | NEG                    | POS                        | NEG                        | NEG                                                         | NEG                                         |
| Riyadh-3022844                                           | NEG                              | NEG                                 | POS                      | AMB          | NEG                                               | NEG                                               | NEG         | NEG           | NEG                    | POS                        | NEG                        | NEG                                                         | NEG                                         |
| Riyadh-3108214-2                                         | NEG                              | NEG                                 | POS                      | AMB          | NEG                                               | NEG                                               | NEG         | NEG           | NEG                    | POS                        | NEG                        | NEG                                                         | NEG                                         |
| Riyadh-2823926                                           | NEG                              | NEG                                 | POS                      | AMB          | NEG                                               | NEG                                               | NEG         | NEG           | NEG                    | POS                        | NEG                        | NEG                                                         | NEG                                         |
| Riyadh-1                                                 | NEG                              | NEG                                 | POS                      | AMB          | NEG                                               | NEG                                               | NEG         | NEG           | NEG                    | POS                        | NEG                        | NEG                                                         | NEG                                         |
| Riyadh-2818388                                           | NEG                              | NEG                                 | POS                      | AMB          | NEG                                               | NEG                                               | NEG         | NEG           | NEG                    | POS                        | NEG                        | NEG                                                         | NEG                                         |
| Riyadh-3112315                                           | NEG                              | NEG                                 | POS                      | AMB          | NEG                                               | NEG                                               | NEG         | NEG           | NEG                    | POS                        | NEG                        | NEG                                                         | NEG                                         |
| <b>CC9/ST834-MRSA-(atypical SCCmec)</b>                  |                                  |                                     | POS                      | NEG          | NEG                                               | NEG                                               | NEG         | NEG           | NEG                    | POS                        | NEG                        | NEG                                                         | NEG                                         |
| Riyadh-3103521                                           | NEG                              | NEG                                 | POS                      | NEG          | NEG                                               | NEG                                               | NEG         | NEG           | NEG                    | POS                        | NEG                        | NEG                                                         | NEG                                         |
| <b>CC22-MRSA-IV, Barnim/UK-EMRSA-15</b>                  |                                  |                                     | POS                      | NEG          | NEG                                               | NEG                                               | NEG         | NEG           | NEG                    | POS                        | NEG                        | NEG                                                         | NEG                                         |
| Riyadh-2553350                                           | NEG                              | NEG                                 | POS                      | NEG          | NEG                                               | NEG                                               | NEG         | NEG           | NEG                    | POS                        | NEG                        | NEG                                                         | NEG                                         |
| Riyadh-2571758                                           | NEG                              | NEG                                 | POS                      | NEG          | NEG                                               | NEG                                               | NEG         | NEG           | NEG                    | POS                        | NEG                        | NEG                                                         | NEG                                         |
| Riyadh-3029203                                           | NEG                              | NEG                                 | POS                      | NEG          | NEG                                               | NEG                                               | NEG         | NEG           | NEG                    | POS                        | NEG                        | NEG                                                         | NEG                                         |
| Riyadh-3039785                                           | NEG                              | NEG                                 | POS                      | NEG          | NEG                                               | NEG                                               | NEG         | NEG           | NEG                    | POS                        | NEG                        | NEG                                                         | NEG                                         |
| Riyadh-3105594                                           | NEG                              | NEG                                 | POS                      | NEG          | NEG                                               | NEG                                               | NEG         | NEG           | NEG                    | POS                        | NEG                        | NEG                                                         | NEG                                         |
| Riyadh_IC_204-2                                          | NEG                              | NEG                                 | POS                      | NEG          | NEG                                               | NEG                                               | NEG         | NEG           | NEG                    | POS                        | NEG                        | NEG                                                         | NEG                                         |
| Riyadh-3003974                                           | NEG                              | NEG                                 | POS                      | NEG          | NEG                                               | NEG                                               | NEG         | NEG           | NEG                    | POS                        | NEG                        | NEG                                                         | NEG                                         |
| Riyadh_IC_067                                            | NEG                              | NEG                                 | POS                      | NEG          | NEG                                               | NEG                                               | NEG         | NEG           | NEG                    | POS                        | NEG                        | NEG                                                         | NEG                                         |
| Riyadh-2988627                                           | NEG                              | NEG                                 | POS                      | NEG          | NEG                                               | NEG                                               | NEG         | NEG           | NEG                    | POS                        | NEG                        | NEG                                                         | NEG                                         |
| Riyadh-3112581                                           | NEG                              | NEG                                 | POS                      | NEG          | NEG                                               | NEG                                               | NEG         | NEG           | NEG                    | POS                        | NEG                        | NEG                                                         | NEG                                         |
| <b>CC22-MRSA-IV [PVL+]</b>                               |                                  |                                     | POS                      | NEG          | NEG                                               | NEG                                               | NEG         | NEG           | NEG                    | POS                        | NEG                        | NEG                                                         | NEG                                         |
| Riyadh-2781995-1                                         | NEG                              | NEG                                 | POS                      | NEG          | NEG                                               | NEG                                               | NEG         | NEG           | NEG                    | POS                        | NEG                        | NEG                                                         | NEG                                         |
| Riyadh-3103432                                           | NEG                              | NEG                                 | POS                      | NEG          | NEG                                               | NEG                                               | NEG         | NEG           | NEG                    | POS                        | NEG                        | NEG                                                         | NEG                                         |
| Riyadh-3026502                                           | NEG                              | NEG                                 | POS                      | NEG          | NEG                                               | NEG                                               | NEG         | NEG           | NEG                    | POS                        | NEG                        | NEG                                                         | NEG                                         |
| Riyadh-3081378-2                                         | NEG                              | NEG                                 | POS                      | NEG          | NEG                                               | NEG                                               | NEG         | NEG           | NEG                    | POS                        | NEG                        | NEG                                                         | NEG                                         |
| Riyadh_IC_185                                            | NEG                              | NEG                                 | POS                      | NEG          | NEG                                               | NEG                                               | NEG         | NEG           | NEG                    | POS                        | NEG                        | NEG                                                         | NEG                                         |
| Riyadh_IC_204-1                                          | NEG                              | NEG                                 | POS                      | NEG          | NEG                                               | NEG                                               | NEG         | NEG           | NEG                    | POS                        | NEG                        | NEG                                                         | NEG                                         |
| Riyadh-1559371                                           | NEG                              | NEG                                 | POS                      | NEG          | NEG                                               | NEG                                               | NEG         | NEG           | NEG                    | POS                        | NEG                        | NEG                                                         | NEG                                         |
| Riyadh-2753975                                           | NEG                              | NEG                                 | POS                      | NEG          | NEG                                               | NEG                                               | NEG         | NEG           | NEG                    | POS                        | NEG                        | NEG                                                         | NEG                                         |
| Riyadh-2775605                                           | NEG                              | NEG                                 | POS                      | NEG          | NEG                                               | NEG                                               | NEG         | NEG           | NEG                    | POS                        | NEG                        | NEG                                                         | NEG                                         |
| Riyadh-2781996-2                                         | NEG                              | NEG                                 | POS                      | NEG          | NEG                                               | NEG                                               | NEG         | NEG           | NEG                    | POS                        | NEG                        | NEG                                                         | NEG                                         |
| Riyadh-2827893-2                                         | NEG                              | NEG                                 | POS                      | NEG          | NEG                                               | NEG                                               | NEG         | NEG           | NEG                    | POS                        | NEG                        | NEG                                                         | NEG                                         |
| Riyadh-2876601                                           | NEG                              | NEG                                 | POS                      | NEG          | NEG                                               | NEG                                               | NEG         | NEG           | NEG                    | POS                        | NEG                        | NEG                                                         | NEG                                         |
| Riyadh-3036074                                           | NEG                              | NEG                                 | POS                      | NEG          | NEG                                               | NEG                                               | NEG         | NEG           | NEG                    | POS                        | NEG                        | NEG                                                         | NEG                                         |
| Riyadh-3053099                                           | NEG                              | NEG                                 | POS                      | NEG          | NEG                                               | NEG                                               | NEG         | NEG           | NEG                    | POS                        | NEG                        | NEG                                                         | NEG                                         |
| Riyadh-3055366                                           | NEG                              | NEG                                 | POS                      | NEG          | NEG                                               | NEG                                               | NEG         | NEG           | NEG                    | POS                        | NEG                        | NEG                                                         | NEG                                         |
| Riyadh-3082712                                           | NEG                              | NEG                                 | POS                      | NEG          | NEG                                               | NEG                                               | NEG         | NEG           | NEG                    | POS                        | NEG                        | NEG                                                         | NEG                                         |
| Riyadh-3087502                                           | NEG                              | NEG                                 | POS                      | NEG          | NEG                                               | NEG                                               | NEG         | NEG           | NEG                    | POS                        | NEG                        | NEG                                                         | NEG                                         |
| Riyadh-6                                                 | NEG                              | NEG                                 | POS                      | NEG          | NEG                                               | NEG                                               | NEG         | NEG           | NEG                    | POS                        | NEG                        | NEG                                                         | NEG                                         |
| Riyadh-7                                                 | NEG                              | NEG                                 | POS                      | NEG          | NEG                                               | NEG                                               | NEG         | NEG           | NEG                    | POS                        | NEG                        | NEG                                                         | NEG                                         |
| Riyadh-8                                                 | NEG                              | NEG                                 | POS                      | NEG          | NEG                                               | NEG                                               | NEG         | NEG           | NEG                    | POS                        | NEG                        | NEG                                                         | NEG                                         |
| <b>CC30-MRSA-IV [PVL+], Southwest Pacific Clone</b>      |                                  |                                     | POS                      | NEG          | NEG                                               | NEG                                               | NEG         | NEG           | NEG                    | POS                        | NEG                        | NEG                                                         | NEG                                         |
| Riyadh-10                                                | NEG                              | NEG                                 | POS                      | NEG          | NEG                                               | NEG                                               | NEG         | NEG           | NEG                    | POS                        | NEG                        | NEG                                                         | NEG                                         |
| Riyadh_IC_123                                            | NEG                              | NEG                                 | POS                      | NEG          | NEG                                               | NEG                                               | NEG         | NEG           | NEG                    | POS                        | NEG                        | NEG                                                         | NEG                                         |
| Riyadh-3080713                                           | NEG                              | NEG                                 | POS                      | NEG          | NEG                                               | NEG                                               | NEG         | NEG           | NEG                    | POS                        | NEG                        | NEG                                                         | NEG                                         |
| Riyadh-2803856                                           | NEG                              | NEG                                 | POS                      | NEG          | NEG                                               | NEG                                               | NEG         | NEG           | NEG                    | POS                        | NEG                        | NEG                                                         | NEG                                         |
| Riyadh-2817276-1                                         | NEG                              | NEG                                 | POS                      | AMB          | AMB                                               | NEG                                               | NEG         | NEG           | NEG                    | POS                        | NEG                        | NEG                                                         | NEG                                         |
| Riyadh-2817571-2                                         | NEG                              | NEG                                 | POS                      | NEG          | NEG                                               | NEG                                               | NEG         | NEG           | NEG                    | POS                        | NEG                        | NEG                                                         | NEG                                         |
| Riyadh-3033868                                           | NEG                              | NEG                                 | POS                      | NEG          | NEG                                               | NEG                                               | NEG         | NEG           | NEG                    | POS                        | NEG                        | NEG                                                         | NEG                                         |
| Riyadh-2550100                                           | NEG                              | NEG                                 | POS                      | NEG          | NEG                                               | NEG                                               | NEG         | NEG           | NEG                    | POS                        | NEG                        | NEG                                                         | NEG                                         |
| Riyadh-3095056-2                                         | NEG                              | NEG                                 | POS                      | NEG          | NEG                                               | NEG                                               | NEG         | NEG           | NEG                    | POS                        | NEG                        | NEG                                                         | NEG                                         |
| Riyadh-2819899                                           | NEG                              | NEG                                 | POS                      | NEG          | NEG                                               | NEG                                               | NEG         | NEG           | NEG                    | POS                        | NEG                        | NEG                                                         | NEG                                         |
| Riyadh-2821805                                           | NEG                              | NEG                                 | POS                      | NEG          | NEG                                               | NEG                                               | NEG         | NEG           | NEG                    | POS                        | NEG                        | NEG                                                         | NEG                                         |
| Riyadh-3013928                                           | NEG                              | NEG                                 | POS                      | NEG          | NEG                                               | NEG                                               | NEG         | NEG           | NEG                    | POS                        | NEG                        | NEG                                                         | NEG                                         |
| Riyadh-3029402                                           | NEG                              | NEG                                 | POS                      | NEG          | NEG                                               | NEG                                               | NEG         | NEG           | NEG                    | POS                        | NEG                        | NEG                                                         | NEG                                         |
| <b>CC45/agr IV-MRSA-IV, WA MRSA-23</b>                   |                                  |                                     | POS                      | NEG          | NEG                                               | NEG                                               | NEG         | NEG           | NEG                    | POS                        | NEG                        | NEG                                                         | NEG                                         |
| Riyadh-3081378-1                                         | NEG                              | NEG                                 | POS                      | NEG          | NEG                                               | NEG                                               | NEG         | NEG           | NEG                    | POS                        | NEG                        | NEG                                                         | NEG                                         |
| <b>CC80-MRSA-IV</b>                                      |                                  |                                     | POS                      | NEG          | NEG                                               | NEG                                               | NEG         | NEG           | NEG                    | POS                        | NEG                        | NEG                                                         | NEG                                         |
| Riyadh-3107635                                           | NEG                              | NEG                                 | POS                      | NEG          | NEG                                               | NEG                                               | NEG         | NEG           | NEG                    | POS                        | NEG                        | NEG                                                         | NEG                                         |
| Riyadh-2987458                                           | NEG                              | NEG                                 | POS                      | NEG          | NEG                                               | NEG                                               | NEG         | NEG           | NEG                    | POS                        | NEG                        | NEG                                                         | NEG                                         |
| <b>CC80-MRSA-IV [PVL+], European caMRSA Clone</b>        |                                  |                                     | POS                      | NEG          | NEG                                               | NEG                                               | NEG         | NEG           | NEG                    | POS                        | NEG                        | NEG                                                         | NEG                                         |
| Riyadh-2988048                                           | NEG                              | NEG                                 | POS                      | NEG          | NEG                                               | NEG                                               | NEG         | NEG           | NEG                    | POS                        | NEG                        | NEG                                                         | NEG                                         |
| Riyadh-2990585-2                                         | NEG                              | NEG                                 | POS                      | NEG          | NEG                                               | NEG                                               | NEG         | NEG           | NEG                    | POS                        | NEG                        | NEG                                                         | NEG                                         |
| Riyadh-2990585-1                                         | NEG                              | NEG                                 | POS                      | NEG          | NEG                                               | NEG                                               | NEG         | NEG           | NEG                    | POS                        | NEG                        | NEG                                                         | NEG                                         |
| Riyadh-2826033                                           | NEG                              | NEG                                 | POS                      | NEG          | NEG                                               | NEG                                               | NEG         | NEG           | NEG                    | POS                        | NEG                        | NEG                                                         | NEG                                         |
| Riyadh-1601562                                           | NEG                              | NEG                                 | POS                      | NEG          | NEG                                               | NEG                                               | NEG         | NEG           | NEG                    | POS                        | NEG                        | NEG                                                         | NEG                                         |
| Riyadh-2569940                                           | NEG                              | NEG                                 | POS                      | NEG          | NEG                                               | NEG                                               | NEG         | NEG           | NEG                    | POS                        | NEG                        | NEG                                                         | NEG                                         |
| Riyadh-2571692                                           | NEG                              | NEG                                 | POS                      | NEG          | NEG                                               | NEG                                               | NEG         | NEG           | NEG                    | POS                        | NEG                        | NEG                                                         | NEG                                         |
| Riyadh-2763029                                           | NEG                              | NEG                                 | POS                      | NEG          | NEG                                               | NEG                                               | NEG         | NEG           | NEG                    | POS                        | NEG                        | NEG                                                         | NEG                                         |
| Riyadh-2767090                                           | NEG                              | NEG                                 | POS                      | NEG          | NEG                                               | NEG                                               | NEG         | NEG           | NEG                    | POS                        | NEG                        | NEG                                                         | NEG                                         |
| Riyadh-2775130                                           | NEG                              | NEG                                 | POS                      | NEG          | NEG                                               | NEG                                               | NEG         | NEG           | NEG                    | POS                        | NEG                        | NEG                                                         | NEG                                         |
| Riyadh-2778256                                           | NEG                              | NEG                                 | POS                      | NEG          | NEG                                               | NEG                                               | NEG         | NEG           | NEG                    | POS                        | NEG                        | NEG                                                         | NEG                                         |
| Riyadh-2817505                                           | NEG                              | NEG                                 | POS                      | NEG          | NEG                                               | NEG                                               | NEG         | NEG           | NEG                    | POS                        | NEG                        | NEG                                                         | NEG                                         |
| Riyadh-3024912                                           | NEG                              | NEG                                 | POS                      | NEG          | NEG                                               | NEG                                               | NEG         | NEG           | NEG                    | POS                        | NEG                        | NEG                                                         | NEG                                         |
| Riyadh-2786990                                           | NEG                              | NEG                                 | POS                      | NEG          | NEG                                               | NEG                                               | NEG         | NEG           | NEG                    | POS                        | NEG                        | NEG                                                         | NEG                                         |
| Riyadh-2829034                                           | NEG                              | NEG                                 | POS                      | NEG          | NEG                                               | NEG                                               | NEG         | NEG           | NEG                    | POS                        | NEG                        | AMB                                                         | NEG                                         |
| Riyadh-3                                                 | NEG                              | NEG                                 | POS                      | NEG          | NEG                                               | NEG                                               | NEG         | NEG           | NEG                    | POS                        | NEG                        | NEG                                                         | NEG                                         |
| Riyadh-5                                                 | NEG                              | NEG                                 | POS                      | NEG          | NEG                                               | NEG                                               | NEG         | NEG           | NEG                    | POS                        | NEG                        | NEG                                                         | NEG                                         |
| Riyadh-2553167                                           | NEG                              | NEG                                 | POS                      | NEG          | NEG                                               | NEG                                               | NEG         | NEG           | NEG                    | POS                        | NEG                        | NEG                                                         | NEG                                         |
| Riyadh-3002592                                           | NEG                              | NEG                                 | POS                      |              |                                                   |                                                   |             |               |                        |                            |                            |                                                             |                                             |

|                                                          | VIRULENCE : TOX.SCHOCK.TOXIN |                             |                              | VIRULENCE : ENTEROTOXINS |                                        |                                                         |               |               |               |               |               |               |               |
|----------------------------------------------------------|------------------------------|-----------------------------|------------------------------|--------------------------|----------------------------------------|---------------------------------------------------------|---------------|---------------|---------------|---------------|---------------|---------------|---------------|
|                                                          | tst1<br>(consensus)          | tst1<br>("human"<br>allele) | tst1<br>("bovine"<br>allele) | entA                     | entA (320E)                            | entA (N315)<br>/ entP                                   | entB          | entC          | entD          | entE          | entG          | entH          | entI          |
|                                                          | toxic shock syndrome toxin 1 |                             |                              | enterotoxin A            | enterotoxin A, allele from strain 320E | enterotoxin A, allele from strain N315 = entero-toxin P | enterotoxin B | enterotoxin C | enterotoxin D | enterotoxin E | enterotoxin G | enterotoxin H | enterotoxin I |
| <b>CC1-MRSA-IV&amp;SCCfus, WA MRSA-1/45</b>              |                              |                             |                              |                          |                                        |                                                         |               |               |               |               |               |               |               |
| Riyadh-3108609                                           | NEG                          | NEG                         | NEG                          | POS                      | NEG                                    | NEG                                                     | NEG           | NEG           | NEG           | NEG           | NEG           | POS           | NEG           |
| Riyadh-2913235                                           | NEG                          | NEG                         | NEG                          | POS                      | NEG                                    | NEG                                                     | NEG           | NEG           | NEG           | NEG           | NEG           | POS           | NEG           |
| <b>CC1/ST772-MRSA-V [PVL+], "Bengal Bay Clone/WA I"</b>  |                              |                             |                              |                          |                                        |                                                         |               |               |               |               |               |               |               |
| Riyadh-2819026                                           | AMB                          | NEG                         | NEG                          | POS                      | AMB                                    | NEG                                                     | AMB           | POS           | NEG           | NEG           | POS           | NEG           | POS           |
| <b>CC5-MRSA-IV, Paediatric clone</b>                     |                              |                             |                              |                          |                                        |                                                         |               |               |               |               |               |               |               |
| Riyadh-2915327-1                                         | NEG                          | NEG                         | NEG                          | NEG                      | NEG                                    | NEG                                                     | NEG           | NEG           | NEG           | NEG           | POS           | NEG           | POS           |
| Riyadh-2915327-2                                         | NEG                          | NEG                         | NEG                          | NEG                      | NEG                                    | NEG                                                     | NEG           | NEG           | NEG           | NEG           | POS           | NEG           | POS           |
| Riyadh-2                                                 | NEG                          | NEG                         | NEG                          | NEG                      | NEG                                    | NEG                                                     | POS           | NEG           | NEG           | NEG           | POS           | NEG           | POS           |
| <b>CC5-MRSA-IV [PVL+], Paediatric clone</b>              |                              |                             |                              |                          |                                        |                                                         |               |               |               |               |               |               |               |
| Riyadh-2986666                                           | NEG                          | AMB                         | NEG                          | NEG                      | NEG                                    | POS                                                     | NEG           | NEG           | NEG           | NEG           | POS           | NEG           | POS           |
| Riyadh-2913235                                           | NEG                          | AMB                         | NEG                          | NEG                      | NEG                                    | POS                                                     | NEG           | NEG           | NEG           | NEG           | POS           | NEG           | POS           |
| <b>CC5-MRSA-IVvar, "Maltese Clone"</b>                   |                              |                             |                              |                          |                                        |                                                         |               |               |               |               |               |               |               |
| Riyadh-2983654                                           | NEG                          | NEG                         | NEG                          | POS                      | NEG                                    | NEG                                                     | NEG           | NEG           | NEG           | NEG           | POS           | NEG           | POS           |
| Riyadh-4                                                 | NEG                          | NEG                         | NEG                          | POS                      | NEG                                    | NEG                                                     | NEG           | NEG           | NEG           | NEG           | POS           | NEG           | POS           |
| Riyadh-2790233                                           | POS                          | POS                         | NEG                          | POS                      | NEG                                    | NEG                                                     | NEG           | POS           | NEG           | NEG           | POS           | NEG           | POS           |
| <b>CC5-MRSA-V</b>                                        |                              |                             |                              |                          |                                        |                                                         |               |               |               |               |               |               |               |
| Riyadh-2568944                                           | NEG                          | NEG                         | NEG                          | NEG                      | NEG                                    | POS                                                     | NEG           | NEG           | POS           | NEG           | POS           | NEG           | POS           |
| <b>CC6-MRSA-IV, WA MRSA-51/66</b>                        |                              |                             |                              |                          |                                        |                                                         |               |               |               |               |               |               |               |
| Riyadh-2556168                                           | NEG                          | NEG                         | NEG                          | POS                      | NEG                                    | NEG                                                     | NEG           | NEG           | NEG           | NEG           | NEG           | NEG           | NEG           |
| Riyadh-2824507                                           | NEG                          | NEG                         | NEG                          | POS                      | NEG                                    | NEG                                                     | NEG           | NEG           | NEG           | NEG           | NEG           | NEG           | NEG           |
| Riyadh-2990831                                           | AMB                          | NEG                         | NEG                          | POS                      | AMB                                    | NEG                                                     | NEG           | NEG           | NEG           | NEG           | NEG           | NEG           | NEG           |
| <b>CC9/ST239-MRSA-III, Vienna/Hungarian/Brazilian Cl</b> |                              |                             |                              |                          |                                        |                                                         |               |               |               |               |               |               |               |
| Riyadh-0                                                 | NEG                          | NEG                         | NEG                          | POS                      | NEG                                    | NEG                                                     | NEG           | NEG           | NEG           | NEG           | NEG           | NEG           | NEG           |
| Riyadh-3028763                                           | NEG                          | NEG                         | NEG                          | NEG                      | NEG                                    | NEG                                                     | NEG           | NEG           | NEG           | NEG           | NEG           | NEG           | NEG           |
| Riyadh-2817437                                           | NEG                          | NEG                         | NEG                          | NEG                      | NEG                                    | NEG                                                     | NEG           | NEG           | NEG           | NEG           | NEG           | NEG           | NEG           |
| Riyadh-2793706                                           | NEG                          | NEG                         | NEG                          | NEG                      | NEG                                    | NEG                                                     | NEG           | NEG           | NEG           | NEG           | NEG           | NEG           | NEG           |
| Riyadh-2818797                                           | NEG                          | NEG                         | NEG                          | NEG                      | NEG                                    | NEG                                                     | NEG           | NEG           | NEG           | NEG           | NEG           | NEG           | NEG           |
| Riyadh-2822825                                           | AMB                          | NEG                         | NEG                          | NEG                      | NEG                                    | NEG                                                     | NEG           | NEG           | NEG           | NEG           | NEG           | NEG           | NEG           |
| Riyadh-2888905                                           | NEG                          | NEG                         | NEG                          | NEG                      | NEG                                    | NEG                                                     | NEG           | NEG           | NEG           | NEG           | NEG           | NEG           | NEG           |
| Riyadh-2888915                                           | NEG                          | NEG                         | NEG                          | NEG                      | NEG                                    | NEG                                                     | NEG           | NEG           | NEG           | NEG           | NEG           | NEG           | NEG           |
| Riyadh-2567782                                           | NEG                          | NEG                         | NEG                          | NEG                      | NEG                                    | NEG                                                     | NEG           | NEG           | NEG           | NEG           | NEG           | NEG           | NEG           |
| Riyadh-2891670                                           | AMB                          | NEG                         | NEG                          | NEG                      | NEG                                    | NEG                                                     | NEG           | NEG           | NEG           | NEG           | NEG           | NEG           | NEG           |
| Riyadh-3006920                                           | NEG                          | NEG                         | NEG                          | NEG                      | NEG                                    | NEG                                                     | NEG           | NEG           | NEG           | NEG           | NEG           | NEG           | NEG           |
| Riyadh-2817276-1                                         | NEG                          | NEG                         | NEG                          | NEG                      | NEG                                    | NEG                                                     | NEG           | NEG           | NEG           | NEG           | NEG           | NEG           | NEG           |
| Riyadh-0295102                                           | NEG                          | NEG                         | NEG                          | NEG                      | NEG                                    | NEG                                                     | NEG           | NEG           | NEG           | NEG           | NEG           | NEG           | NEG           |
| Riyadh-2820597                                           | AMB                          | NEG                         | NEG                          | NEG                      | NEG                                    | NEG                                                     | NEG           | NEG           | NEG           | NEG           | NEG           | NEG           | NEG           |
| Riyadh-2822088                                           | AMB                          | AMB                         | NEG                          | NEG                      | NEG                                    | NEG                                                     | NEG           | NEG           | NEG           | NEG           | NEG           | NEG           | NEG           |
| Riyadh-3010092                                           | NEG                          | NEG                         | NEG                          | NEG                      | NEG                                    | NEG                                                     | NEG           | NEG           | NEG           | NEG           | NEG           | NEG           | NEG           |
| Riyadh-3022844                                           | NEG                          | NEG                         | NEG                          | NEG                      | NEG                                    | NEG                                                     | NEG           | NEG           | NEG           | NEG           | NEG           | NEG           | NEG           |
| Riyadh-3108214-2                                         | NEG                          | NEG                         | NEG                          | NEG                      | NEG                                    | NEG                                                     | NEG           | NEG           | NEG           | NEG           | NEG           | NEG           | NEG           |
| Riyadh-2823926                                           | NEG                          | NEG                         | NEG                          | NEG                      | NEG                                    | NEG                                                     | NEG           | NEG           | NEG           | NEG           | NEG           | NEG           | NEG           |
| Riyadh-1                                                 | NEG                          | NEG                         | NEG                          | NEG                      | NEG                                    | NEG                                                     | NEG           | NEG           | NEG           | NEG           | NEG           | NEG           | NEG           |
| Riyadh-2818388                                           | NEG                          | NEG                         | NEG                          | NEG                      | NEG                                    | NEG                                                     | NEG           | NEG           | NEG           | NEG           | NEG           | NEG           | NEG           |
| Riyadh-3112315                                           | NEG                          | NEG                         | NEG                          | NEG                      | NEG                                    | NEG                                                     | NEG           | NEG           | NEG           | NEG           | NEG           | NEG           | NEG           |
| <b>CC9/ST834-MRSA-(atypical SCCmec)</b>                  |                              |                             |                              |                          |                                        |                                                         |               |               |               |               |               |               |               |
| Riyadh-3103521                                           | POS                          | POS                         | NEG                          | NEG                      | NEG                                    | NEG                                                     | NEG           | NEG           | POS           | NEG           | NEG           | NEG           | NEG           |
| <b>CC22-MRSA-IV, Barnim/UK-EMRSA-15</b>                  |                              |                             |                              |                          |                                        |                                                         |               |               |               |               |               |               |               |
| Riyadh-2553350                                           | POS                          | POS                         | NEG                          | NEG                      | NEG                                    | NEG                                                     | NEG           | NEG           | NEG           | NEG           | POS           | NEG           | POS           |
| Riyadh-2571758                                           | POS                          | POS                         | NEG                          | NEG                      | NEG                                    | NEG                                                     | NEG           | NEG           | NEG           | NEG           | POS           | NEG           | POS           |
| Riyadh-3029203                                           | POS                          | POS                         | NEG                          | NEG                      | NEG                                    | NEG                                                     | NEG           | NEG           | NEG           | NEG           | POS           | NEG           | POS           |
| Riyadh-3039785                                           | POS                          | POS                         | NEG                          | NEG                      | NEG                                    | NEG                                                     | NEG           | NEG           | NEG           | NEG           | POS           | NEG           | POS           |
| Riyadh-3105594                                           | POS                          | POS                         | NEG                          | NEG                      | NEG                                    | NEG                                                     | NEG           | NEG           | NEG           | NEG           | POS           | NEG           | POS           |
| Riyadh_IC_204-2                                          | NEG                          | AMB                         | NEG                          | NEG                      | NEG                                    | NEG                                                     | NEG           | NEG           | NEG           | NEG           | POS           | NEG           | POS           |
| Riyadh-3003974                                           | POS                          | POS                         | NEG                          | NEG                      | NEG                                    | NEG                                                     | NEG           | NEG           | NEG           | NEG           | POS           | NEG           | POS           |
| Riyadh_IC_067                                            | NEG                          | NEG                         | NEG                          | NEG                      | NEG                                    | NEG                                                     | NEG           | NEG           | NEG           | NEG           | POS           | NEG           | POS           |
| Riyadh-2988627                                           | NEG                          | NEG                         | NEG                          | NEG                      | NEG                                    | NEG                                                     | NEG           | NEG           | NEG           | NEG           | POS           | NEG           | POS           |
| Riyadh-3112581                                           | NEG                          | NEG                         | NEG                          | NEG                      | NEG                                    | NEG                                                     | NEG           | NEG           | NEG           | NEG           | POS           | NEG           | POS           |
| <b>CC22-MRSA-IV [PVL+]</b>                               |                              |                             |                              |                          |                                        |                                                         |               |               |               |               |               |               |               |
| Riyadh-2781996-1                                         | NEG                          | NEG                         | NEG                          | NEG                      | NEG                                    | NEG                                                     | NEG           | NEG           | NEG           | NEG           | POS           | NEG           | POS           |
| Riyadh-3103432                                           | NEG                          | NEG                         | NEG                          | NEG                      | NEG                                    | NEG                                                     | NEG           | NEG           | NEG           | NEG           | POS           | NEG           | POS           |
| Riyadh-3026502                                           | NEG                          | NEG                         | NEG                          | NEG                      | NEG                                    | NEG                                                     | NEG           | NEG           | NEG           | NEG           | POS           | NEG           | POS           |
| Riyadh-3081378-2                                         | NEG                          | NEG                         | NEG                          | NEG                      | NEG                                    | NEG                                                     | NEG           | NEG           | NEG           | NEG           | POS           | NEG           | POS           |
| Riyadh_IC_185                                            | NEG                          | AMB                         | NEG                          | NEG                      | NEG                                    | NEG                                                     | NEG           | NEG           | NEG           | NEG           | POS           | NEG           | POS           |
| Riyadh_IC_204-1                                          | NEG                          | AMB                         | NEG                          | NEG                      | NEG                                    | NEG                                                     | NEG           | NEG           | NEG           | NEG           | POS           | NEG           | POS           |
| Riyadh-3159371                                           | NEG                          | AMB                         | NEG                          | NEG                      | NEG                                    | NEG                                                     | NEG           | NEG           | NEG           | NEG           | POS           | NEG           | POS           |
| Riyadh-2753975                                           | NEG                          | AMB                         | NEG                          | NEG                      | NEG                                    | NEG                                                     | NEG           | NEG           | NEG           | NEG           | POS           | NEG           | POS           |
| Riyadh-2775605                                           | NEG                          | NEG                         | NEG                          | NEG                      | NEG                                    | NEG                                                     | NEG           | NEG           | NEG           | NEG           | POS           | NEG           | POS           |
| Riyadh-2781996-2                                         | NEG                          | NEG                         | NEG                          | NEG                      | NEG                                    | NEG                                                     | NEG           | NEG           | NEG           | NEG           | POS           | NEG           | POS           |
| Riyadh-2827893-2                                         | NEG                          | NEG                         | NEG                          | NEG                      | NEG                                    | NEG                                                     | NEG           | NEG           | NEG           | NEG           | POS           | NEG           | POS           |
| Riyadh-2876601                                           | NEG                          | NEG                         | NEG                          | NEG                      | NEG                                    | NEG                                                     | NEG           | NEG           | NEG           | NEG           | POS           | NEG           | POS           |
| Riyadh-3036074                                           | NEG                          | NEG                         | NEG                          | NEG                      | NEG                                    | NEG                                                     | NEG           | NEG           | NEG           | NEG           | POS           | NEG           | POS           |
| Riyadh-3053099                                           | NEG                          | NEG                         | NEG                          | NEG                      | NEG                                    | NEG                                                     | NEG           | NEG           | NEG           | NEG           | POS           | NEG           | POS           |
| Riyadh-3055366                                           | NEG                          | NEG                         | NEG                          | NEG                      | NEG                                    | NEG                                                     | NEG           | NEG           | NEG           | NEG           | POS           | NEG           | POS           |
| Riyadh-3082712                                           | NEG                          | NEG                         | NEG                          | NEG                      | NEG                                    | NEG                                                     | NEG           | NEG           | NEG           | NEG           | POS           | NEG           | POS           |
| Riyadh-3087502                                           | NEG                          | NEG                         | NEG                          | NEG                      | NEG                                    | NEG                                                     | NEG           | NEG           | NEG           | NEG           | POS           | NEG           | POS           |
| Riyadh-6                                                 | NEG                          | NEG                         | NEG                          | NEG                      | NEG                                    | NEG                                                     | NEG           | NEG           | NEG           | NEG           | POS           | NEG           | POS           |
| Riyadh-7                                                 | NEG                          | NEG                         | NEG                          | NEG                      | NEG                                    | NEG                                                     | NEG           | NEG           | NEG           | NEG           | POS           | NEG           | POS           |
| Riyadh-8                                                 | NEG                          | NEG                         | NEG                          | NEG                      | NEG                                    | NEG                                                     | NEG           | NEG           | NEG           | NEG           | POS           | NEG           | POS           |
| <b>CC30-MRSA-IV [PVL+], Southwest Pacific Clone</b>      |                              |                             |                              |                          |                                        |                                                         |               |               |               |               |               |               |               |
| Riyadh-10                                                | NEG                          | NEG                         | NEG                          | NEG                      | NEG                                    | NEG                                                     | NEG           | NEG           | NEG           | NEG           | POS           | NEG           | POS           |
| Riyadh_IC_123                                            | NEG                          | NEG                         | NEG                          | NEG                      | NEG                                    | NEG                                                     | NEG           | NEG           | NEG           | NEG           | POS           | NEG           | POS           |
| Riyadh-3080713                                           | NEG                          | NEG                         | NEG                          | NEG                      | NEG                                    | NEG                                                     | NEG           | NEG           | NEG           | NEG           | POS           | NEG           | POS           |
| Riyadh-2803856                                           | NEG                          | NEG                         | NEG                          | NEG                      | NEG                                    | NEG                                                     | NEG           | NEG           | NEG           | NEG           | POS           | NEG           | POS           |
| Riyadh-2817276-1                                         | AMB                          | NEG                         | NEG                          | NEG                      | NEG                                    | NEG                                                     | NEG           | NEG           | NEG           | NEG           | POS           | NEG           | POS           |
| Riyadh-2817571-2                                         | NEG                          | NEG                         | NEG                          | NEG                      | NEG                                    | NEG                                                     | NEG           | NEG           | NEG           | NEG           | POS           | NEG           | POS           |
| Riyadh-3033868                                           | NEG                          | NEG                         | NEG                          | NEG                      | NEG                                    | NEG                                                     | NEG           | NEG           | NEG           | NEG           | POS           | NEG           | POS           |
| Riyadh-2550100                                           | NEG                          | NEG                         | NEG                          | NEG                      | NEG                                    | NEG                                                     | NEG           | NEG           | NEG           | NEG           | POS           | NEG           | POS           |
| Riyadh-3095056-2                                         | NEG                          | NEG                         | NEG                          | NEG                      | NEG                                    | NEG                                                     | NEG           | NEG           | NEG           | NEG           | POS           | NEG           | POS           |
| Riyadh-2819899                                           | NEG                          | NEG                         | NEG                          | NEG                      | NEG                                    | NEG                                                     | NEG           | NEG           | NEG           | NEG           | POS           | NEG           | POS           |
| Riyadh-2821805                                           | NEG                          | NEG                         | NEG                          | NEG                      | NEG                                    | NEG                                                     | NEG           | NEG           | NEG           | NEG           | POS           | NEG           | POS           |
| Riyadh-3013928                                           | NEG                          | NEG                         | NEG                          | NEG                      | NEG                                    | NEG                                                     | NEG           | NEG           | NEG           | NEG           | POS           | NEG           | POS           |
| Riyadh-3029402                                           | NEG                          | NEG                         | NEG                          | NEG                      | NEG                                    | NEG                                                     | NEG           | NEG           | NEG           | NEG           | POS           | NEG           | POS           |
| <b>CC45/agr IV-MRSA-IV, WA MRSA-23</b>                   |                              |                             |                              |                          |                                        |                                                         |               |               |               |               |               |               |               |
| Riyadh-3081378-1                                         | NEG                          | NEG                         | NEG                          | NEG                      | NEG                                    | NEG                                                     | NEG           | NEG           | NEG           | NEG           | POS           | NEG           | POS           |
| <b>CC80-MRSA-IV</b>                                      |                              |                             |                              |                          |                                        |                                                         |               |               |               |               |               |               |               |
| Riyadh-3107635                                           | NEG                          | NEG                         | NEG                          | NEG                      | NEG                                    | NEG                                                     | NEG           | NEG           | NEG           | NEG           | NEG           | NEG           | NEG           |
| Riyadh-2987458                                           | NEG                          | AMB                         | NEG                          | NEG                      | NEG                                    | NEG                                                     | POS           | NEG           | NEG           | NEG           | NEG           | NEG           | NEG           |
| <b>CC80-MRSA-IV [PVL+], European caMRSA Clone</b>        |                              |                             |                              |                          |                                        |                                                         |               |               |               |               |               |               |               |
| Riyadh-2988048                                           | NEG                          | NEG                         | NEG                          | NEG                      | NEG                                    | NEG                                                     | NEG           | NEG           | NEG           | NEG           | NEG           | NEG           | NEG           |
| Riyadh-2990585-2                                         | NEG                          | NEG                         | NEG                          | NEG                      | NEG                                    | NEG                                                     | NEG           | NEG           | NEG           | NEG           | NEG           | NEG           | NEG           |
| Riyadh-2990585-1                                         | NEG                          | NEG                         | NEG                          | NEG                      | NEG                                    | NEG                                                     | NEG           | NEG           | NEG           | NEG           | NEG           | NEG           | NEG           |
| Riyadh-2826033                                           | NEG                          | NEG                         | NEG                          | NEG                      | NEG                                    | NEG                                                     | NEG           | NEG           | NEG           | NEG           | NEG           | NEG           | NEG           |
| Riyadh-1601562                                           | NEG                          | NEG                         | NEG                          | NEG                      | NEG                                    | NEG                                                     | NEG           | NEG           | NEG           | NEG           | NEG           | NEG           | NEG           |
| Riyadh-2569940                                           | NEG                          | NEG                         | NEG                          | NEG                      | NEG                                    | NEG                                                     | NEG           | NEG           | NEG           | NEG           | NEG           | NEG           | NEG           |
| Riyadh-2571692                                           | NEG                          | NEG                         | NEG                          | NEG                      | NEG                                    | NEG                                                     | NEG           | NEG           | NEG           | NEG           | NEG           | NEG           | NEG           |
| Riyadh-2763029                                           | NEG                          | NEG                         | NEG                          | NEG                      | NEG                                    | NEG                                                     | NEG           | NEG           | NEG           | NEG           | NEG           | NEG           | NEG           |
| Riyadh-2767090                                           | NEG                          | NEG                         | NEG                          | NEG                      | NEG                                    | NEG                                                     | NEG           | NEG           | NEG           | NEG           | NEG           | NEG           | NEG           |
| Riyadh-2775130                                           | NEG                          | NEG                         | NEG                          | NEG                      | NEG                                    | NEG                                                     | NEG           | NEG           | NEG           | NEG           | NEG           | NEG           | NEG           |
| Riyadh-2778256                                           | NEG                          | NEG                         | NEG                          | NEG                      | NEG                                    | NEG                                                     | NEG           | NEG           | NEG           | NEG           | NEG           | NEG           | NEG           |
| Riyadh-2817505                                           | NEG                          | NEG                         | NEG                          | NEG                      | NEG                                    | NEG                                                     | NEG           | NEG           | NEG           | NEG           | NEG           | NEG           | NEG           |
| Riyadh-3024912                                           | NEG                          | NEG                         | NEG                          | NEG                      | NEG                                    | NEG                                                     | NEG           | NEG           | NEG           | NEG           | NEG           | NEG           | NEG           |
| Riyadh-2786690                                           | NEG                          | NEG                         | NEG                          | NEG                      | NEG                                    | NEG                                                     | NEG           | NEG           | NEG           | NEG           | NEG           | NEG           | NEG           |
| Riyadh-2829034                                           | NEG                          | AMB                         | NEG                          | NEG                      | NEG                                    | NEG                                                     | NEG           | NEG           | NEG           | NEG           | NEG           | NEG           | NEG           |
| Riyadh-3                                                 | NEG                          | NEG                         | NEG                          | NEG                      | NEG                                    | NEG                                                     | NEG           | NEG           | NEG           | NEG           | NEG           | NEG           | NEG           |
| Riyadh-5                                                 | NEG                          | NEG                         | NEG                          | NEG                      | NEG                                    | NEG                                                     | NEG           | NEG           | NEG           | NEG           | NEG           | NEG           | NEG           |
| Riyadh-2553167                                           | NEG                          | NEG                         | NEG                          | NEG                      | NEG                                    | NEG                                                     | NEG           | NEG           | NEG           | NEG           | NEG           | NEG           | NEG           |
| Riyadh-3002592                                           | NEG                          | NEG                         | NEG                          | NEG                      | NEG                                    | NEG                                                     | NEG           | NEG           | NEG           | NEG           | NEG           | NEG           | NEG           |
| <b>CC88-MRSA-IV [PVL+]</b>                               |                              |                             |                              |                          |                                        |                                                         |               |               |               |               |               |               |               |
| Riyadh-2736996                                           | NEG                          | NEG                         | NEG                          | NEG                      | NEG                                    | NEG                                                     | NEG           | NEG           |               |               |               |               |               |



|                                                          | VIRULENCE : HLG AND LEUKOCIDINS            |                                            |                               |                                         |                                         |                                                         |                                                         |                        |                        |                                            |                                            |      |                  |
|----------------------------------------------------------|--------------------------------------------|--------------------------------------------|-------------------------------|-----------------------------------------|-----------------------------------------|---------------------------------------------------------|---------------------------------------------------------|------------------------|------------------------|--------------------------------------------|--------------------------------------------|------|------------------|
|                                                          | lukF                                       | lukS                                       | lukS (ST2+ST45)               | hlxA                                    | lukF-PV                                 | lukS-PV                                                 | lukF-PV (P83)                                           | lukM                   | lukD                   | lukE                                       | lukX                                       | lukY | lukY (ST30+ST45) |
|                                                          | haemolysin gamma / leukocidin, component B | haemolysin gamma / leukocidin, component C | haemolysin gamma, component A | Panton Valentine leukocidin F component | Panton Valentine leukocidin S component | F component from hypothetical leukocidin from ruminants | S component from hypothetical leukocidin from ruminants | leukocidin D component | leukocidin E component | leukocidin/haemolysin toxin family protein | leukocidin/haemolysin toxin family protein |      |                  |
| <b>CC1-MRSA-IV&amp;SCCFus, WA MRSA-1/45</b>              | POS                                        | POS                                        | POS                           | POS                                     | NEG                                     | NEG                                                     | NEG                                                     | NEG                    | POS                    | POS                                        | POS                                        | POS  | NEG              |
| Riyadh-3108609                                           | POS                                        | POS                                        | POS                           | POS                                     | NEG                                     | NEG                                                     | NEG                                                     | NEG                    | POS                    | POS                                        | POS                                        | POS  | NEG              |
| <b>CC1/ST772-MRSA-V [PVL+], "Bengal Bay Clone/WA I"</b>  | POS                                        | POS                                        | POS                           | POS                                     | POS                                     | POS                                                     | NEG                                                     | NEG                    | NEG                    | NEG                                        | POS                                        | POS  | NEG              |
| Riyadh-2819026                                           | POS                                        | POS                                        | POS                           | POS                                     | POS                                     | POS                                                     | NEG                                                     | NEG                    | NEG                    | NEG                                        | POS                                        | POS  | NEG              |
| <b>CC5-MRSA-IV, Paediatric clone</b>                     | POS                                        | POS                                        | POS                           | POS                                     | NEG                                     | NEG                                                     | NEG                                                     | NEG                    | POS                    | POS                                        | POS                                        | POS  | NEG              |
| Riyadh-2915327-1                                         | POS                                        | POS                                        | POS                           | POS                                     | NEG                                     | NEG                                                     | NEG                                                     | NEG                    | POS                    | POS                                        | POS                                        | POS  | NEG              |
| Riyadh-2915327-2                                         | POS                                        | POS                                        | POS                           | POS                                     | NEG                                     | NEG                                                     | NEG                                                     | NEG                    | POS                    | POS                                        | POS                                        | POS  | NEG              |
| Riyadh-2                                                 | POS                                        | POS                                        | POS                           | POS                                     | NEG                                     | NEG                                                     | NEG                                                     | NEG                    | POS                    | POS                                        | POS                                        | POS  | NEG              |
| <b>CC5-MRSA-IV [PVL+], Paediatric clone</b>              | POS                                        | POS                                        | POS                           | POS                                     | POS                                     | POS                                                     | NEG                                                     | NEG                    | POS                    | POS                                        | POS                                        | POS  | NEG              |
| Riyadh-2985666                                           | POS                                        | POS                                        | POS                           | POS                                     | POS                                     | POS                                                     | NEG                                                     | NEG                    | POS                    | POS                                        | POS                                        | POS  | NEG              |
| Riyadh-2913235                                           | POS                                        | POS                                        | POS                           | POS                                     | POS                                     | POS                                                     | NEG                                                     | NEG                    | POS                    | POS                                        | POS                                        | POS  | NEG              |
| <b>CC5-MRSA-IVvar, "Maltese Clone"</b>                   | POS                                        | POS                                        | POS                           | POS                                     | NEG                                     | NEG                                                     | NEG                                                     | NEG                    | POS                    | POS                                        | POS                                        | POS  | NEG              |
| Riyadh-2983654                                           | POS                                        | POS                                        | POS                           | POS                                     | NEG                                     | NEG                                                     | NEG                                                     | NEG                    | POS                    | POS                                        | POS                                        | POS  | NEG              |
| Riyadh-4                                                 | POS                                        | POS                                        | POS                           | POS                                     | NEG                                     | NEG                                                     | NEG                                                     | NEG                    | POS                    | POS                                        | POS                                        | POS  | NEG              |
| Riyadh-2790233                                           | POS                                        | POS                                        | POS                           | POS                                     | NEG                                     | NEG                                                     | NEG                                                     | NEG                    | POS                    | POS                                        | POS                                        | POS  | NEG              |
| <b>CC5-MRSA-V</b>                                        | POS                                        | POS                                        | POS                           | POS                                     | NEG                                     | NEG                                                     | NEG                                                     | NEG                    | POS                    | POS                                        | POS                                        | POS  | NEG              |
| Riyadh-2568944                                           | POS                                        | POS                                        | POS                           | POS                                     | NEG                                     | NEG                                                     | NEG                                                     | NEG                    | POS                    | POS                                        | POS                                        | POS  | NEG              |
| <b>CC6-MRSA-IV, WA MRSA-51/66</b>                        | POS                                        | POS                                        | POS                           | POS                                     | NEG                                     | NEG                                                     | NEG                                                     | NEG                    | POS                    | POS                                        | POS                                        | POS  | NEG              |
| Riyadh-2556168                                           | POS                                        | POS                                        | POS                           | POS                                     | NEG                                     | NEG                                                     | NEG                                                     | NEG                    | POS                    | POS                                        | POS                                        | POS  | NEG              |
| Riyadh-2824507                                           | POS                                        | POS                                        | POS                           | POS                                     | NEG                                     | NEG                                                     | NEG                                                     | NEG                    | POS                    | POS                                        | POS                                        | POS  | NEG              |
| Riyadh-2990831                                           | POS                                        | POS                                        | POS                           | POS                                     | NEG                                     | NEG                                                     | NEG                                                     | NEG                    | POS                    | POS                                        | POS                                        | POS  | NEG              |
| <b>CC9/ST239-MRSA-III, Vienna/Hungarian/Brazilian Cl</b> | POS                                        | POS                                        | POS                           | POS                                     | NEG                                     | NEG                                                     | NEG                                                     | NEG                    | POS                    | POS                                        | POS                                        | POS  | NEG              |
| Riyadh-5                                                 | POS                                        | POS                                        | POS                           | POS                                     | NEG                                     | NEG                                                     | NEG                                                     | NEG                    | POS                    | POS                                        | POS                                        | POS  | NEG              |
| Riyadh-3028763                                           | POS                                        | POS                                        | POS                           | POS                                     | NEG                                     | NEG                                                     | NEG                                                     | NEG                    | POS                    | POS                                        | POS                                        | POS  | NEG              |
| Riyadh-2817437                                           | POS                                        | POS                                        | POS                           | POS                                     | NEG                                     | NEG                                                     | NEG                                                     | NEG                    | POS                    | POS                                        | POS                                        | POS  | NEG              |
| Riyadh-2793706                                           | POS                                        | POS                                        | POS                           | POS                                     | NEG                                     | NEG                                                     | NEG                                                     | NEG                    | POS                    | POS                                        | POS                                        | POS  | NEG              |
| Riyadh-2818797                                           | POS                                        | POS                                        | POS                           | POS                                     | NEG                                     | NEG                                                     | NEG                                                     | NEG                    | POS                    | POS                                        | POS                                        | POS  | NEG              |
| Riyadh-2822825                                           | POS                                        | POS                                        | POS                           | POS                                     | NEG                                     | NEG                                                     | NEG                                                     | NEG                    | POS                    | POS                                        | POS                                        | POS  | NEG              |
| Riyadh-2888905                                           | POS                                        | POS                                        | POS                           | POS                                     | NEG                                     | NEG                                                     | NEG                                                     | NEG                    | POS                    | POS                                        | POS                                        | POS  | NEG              |
| Riyadh-2888915                                           | POS                                        | POS                                        | POS                           | POS                                     | NEG                                     | NEG                                                     | NEG                                                     | NEG                    | POS                    | POS                                        | POS                                        | POS  | NEG              |
| Riyadh-2567782                                           | POS                                        | POS                                        | POS                           | POS                                     | NEG                                     | NEG                                                     | NEG                                                     | NEG                    | POS                    | POS                                        | POS                                        | POS  | NEG              |
| Riyadh-2891670                                           | POS                                        | POS                                        | POS                           | POS                                     | NEG                                     | NEG                                                     | NEG                                                     | NEG                    | POS                    | POS                                        | POS                                        | POS  | NEG              |
| Riyadh-3006920                                           | POS                                        | POS                                        | POS                           | POS                                     | NEG                                     | NEG                                                     | NEG                                                     | NEG                    | POS                    | POS                                        | POS                                        | POS  | NEG              |
| Riyadh-281276-1                                          | POS                                        | POS                                        | POS                           | POS                                     | NEG                                     | NEG                                                     | NEG                                                     | NEG                    | POS                    | POS                                        | POS                                        | POS  | NEG              |
| Riyadh-0295102                                           | POS                                        | POS                                        | POS                           | POS                                     | NEG                                     | NEG                                                     | NEG                                                     | NEG                    | POS                    | POS                                        | POS                                        | POS  | NEG              |
| Riyadh-2820597                                           | POS                                        | POS                                        | POS                           | POS                                     | NEG                                     | NEG                                                     | NEG                                                     | NEG                    | POS                    | POS                                        | POS                                        | POS  | NEG              |
| Riyadh-2822088                                           | POS                                        | POS                                        | POS                           | POS                                     | NEG                                     | NEG                                                     | NEG                                                     | NEG                    | POS                    | POS                                        | POS                                        | POS  | NEG              |
| Riyadh-3010092                                           | POS                                        | POS                                        | POS                           | POS                                     | NEG                                     | NEG                                                     | NEG                                                     | NEG                    | POS                    | POS                                        | POS                                        | POS  | NEG              |
| Riyadh-3022844                                           | POS                                        | POS                                        | POS                           | POS                                     | NEG                                     | NEG                                                     | NEG                                                     | NEG                    | POS                    | POS                                        | POS                                        | POS  | NEG              |
| Riyadh-3108214-2                                         | POS                                        | POS                                        | POS                           | POS                                     | NEG                                     | NEG                                                     | NEG                                                     | NEG                    | POS                    | POS                                        | POS                                        | POS  | NEG              |
| Riyadh-2823926                                           | POS                                        | POS                                        | POS                           | POS                                     | NEG                                     | NEG                                                     | NEG                                                     | NEG                    | POS                    | POS                                        | POS                                        | POS  | NEG              |
| Riyadh-1                                                 | POS                                        | POS                                        | POS                           | POS                                     | NEG                                     | NEG                                                     | NEG                                                     | NEG                    | POS                    | POS                                        | POS                                        | POS  | NEG              |
| Riyadh-2818388                                           | POS                                        | POS                                        | POS                           | POS                                     | NEG                                     | NEG                                                     | NEG                                                     | NEG                    | POS                    | POS                                        | POS                                        | POS  | NEG              |
| Riyadh-3112515                                           | POS                                        | POS                                        | POS                           | POS                                     | NEG                                     | NEG                                                     | NEG                                                     | NEG                    | POS                    | POS                                        | POS                                        | POS  | NEG              |
| <b>CC9/ST834-MRSA-(atypical SCCmec)</b>                  | POS                                        | POS                                        | POS                           | POS                                     | NEG                                     | NEG                                                     | NEG                                                     | NEG                    | POS                    | POS                                        | POS                                        | POS  | NEG              |
| Riyadh-3103521                                           | POS                                        | POS                                        | POS                           | POS                                     | NEG                                     | NEG                                                     | NEG                                                     | NEG                    | POS                    | POS                                        | POS                                        | POS  | NEG              |
| <b>CC22-MRSA-IV, Barnim/UK-EMRSA-15</b>                  | POS                                        | POS                                        | POS                           | POS                                     | NEG                                     | NEG                                                     | NEG                                                     | NEG                    | POS                    | POS                                        | POS                                        | POS  | NEG              |
| Riyadh-2553359                                           | POS                                        | POS                                        | POS                           | POS                                     | NEG                                     | NEG                                                     | NEG                                                     | NEG                    | POS                    | POS                                        | POS                                        | POS  | NEG              |
| Riyadh-2571758                                           | POS                                        | POS                                        | POS                           | POS                                     | NEG                                     | NEG                                                     | NEG                                                     | NEG                    | POS                    | POS                                        | POS                                        | POS  | NEG              |
| Riyadh-3029203                                           | POS                                        | POS                                        | POS                           | POS                                     | NEG                                     | NEG                                                     | NEG                                                     | NEG                    | POS                    | POS                                        | POS                                        | POS  | NEG              |
| Riyadh-3039785                                           | POS                                        | POS                                        | POS                           | POS                                     | NEG                                     | NEG                                                     | NEG                                                     | NEG                    | POS                    | POS                                        | POS                                        | POS  | NEG              |
| Riyadh-3105594                                           | POS                                        | POS                                        | POS                           | POS                                     | NEG                                     | NEG                                                     | NEG                                                     | NEG                    | POS                    | POS                                        | POS                                        | POS  | NEG              |
| Riyadh_IC_204-2                                          | POS                                        | POS                                        | POS                           | POS                                     | NEG                                     | NEG                                                     | NEG                                                     | NEG                    | POS                    | POS                                        | POS                                        | POS  | NEG              |
| Riyadh-3003974                                           | POS                                        | POS                                        | POS                           | POS                                     | NEG                                     | NEG                                                     | NEG                                                     | NEG                    | POS                    | POS                                        | POS                                        | POS  | NEG              |
| Riyadh_IC_067                                            | POS                                        | POS                                        | POS                           | POS                                     | NEG                                     | NEG                                                     | NEG                                                     | NEG                    | POS                    | POS                                        | POS                                        | POS  | NEG              |
| Riyadh-2988627                                           | POS                                        | POS                                        | POS                           | POS                                     | NEG                                     | NEG                                                     | NEG                                                     | NEG                    | POS                    | POS                                        | POS                                        | POS  | NEG              |
| Riyadh-3112581                                           | POS                                        | POS                                        | POS                           | POS                                     | NEG                                     | NEG                                                     | NEG                                                     | NEG                    | POS                    | POS                                        | POS                                        | POS  | NEG              |
| <b>CC22-MRSA-IV [PVL+]</b>                               | POS                                        | POS                                        | POS                           | POS                                     | POS                                     | POS                                                     | NEG                                                     | NEG                    | NEG                    | NEG                                        | POS                                        | POS  | NEG              |
| Riyadh-2781996-1                                         | POS                                        | POS                                        | POS                           | POS                                     | POS                                     | POS                                                     | NEG                                                     | NEG                    | NEG                    | NEG                                        | POS                                        | POS  | NEG              |
| Riyadh-3103432                                           | POS                                        | POS                                        | POS                           | POS                                     | POS                                     | POS                                                     | NEG                                                     | NEG                    | NEG                    | NEG                                        | POS                                        | POS  | NEG              |
| Riyadh-3026502                                           | NEG                                        | NEG                                        | POS                           | POS                                     | POS                                     | POS                                                     | NEG                                                     | NEG                    | NEG                    | NEG                                        | POS                                        | POS  | NEG              |
| Riyadh-3081378-2                                         | AMB                                        | AMB                                        | POS                           | POS                                     | POS                                     | POS                                                     | NEG                                                     | NEG                    | NEG                    | NEG                                        | POS                                        | POS  | NEG              |
| Riyadh_IC_185                                            | POS                                        | POS                                        | POS                           | POS                                     | POS                                     | POS                                                     | NEG                                                     | NEG                    | NEG                    | NEG                                        | POS                                        | POS  | NEG              |
| Riyadh_IC_204-1                                          | POS                                        | POS                                        | POS                           | POS                                     | POS                                     | POS                                                     | NEG                                                     | NEG                    | NEG                    | NEG                                        | POS                                        | POS  | NEG              |
| Riyadh-1559371                                           | POS                                        | POS                                        | POS                           | POS                                     | POS                                     | POS                                                     | NEG                                                     | NEG                    | NEG                    | NEG                                        | POS                                        | POS  | NEG              |
| Riyadh-2753975                                           | POS                                        | POS                                        | POS                           | POS                                     | POS                                     | POS                                                     | NEG                                                     | NEG                    | NEG                    | NEG                                        | POS                                        | POS  | NEG              |
| Riyadh-2775605                                           | POS                                        | POS                                        | POS                           | POS                                     | POS                                     | POS                                                     | NEG                                                     | NEG                    | NEG                    | NEG                                        | POS                                        | POS  | NEG              |
| Riyadh-2781996-2                                         | POS                                        | POS                                        | POS                           | POS                                     | POS                                     | POS                                                     | NEG                                                     | NEG                    | NEG                    | NEG                                        | POS                                        | POS  | NEG              |
| Riyadh-2823783-2                                         | POS                                        | POS                                        | POS                           | POS                                     | POS                                     | POS                                                     | NEG                                                     | NEG                    | NEG                    | NEG                                        | POS                                        | POS  | NEG              |
| Riyadh-2765601                                           | POS                                        | POS                                        | POS                           | POS                                     | POS                                     | POS                                                     | NEG                                                     | NEG                    | NEG                    | NEG                                        | POS                                        | POS  | NEG              |
| Riyadh-3036074                                           | POS                                        | POS                                        | POS                           | POS                                     | POS                                     | POS                                                     | NEG                                                     | NEG                    | NEG                    | NEG                                        | POS                                        | POS  | NEG              |
| Riyadh-3053099                                           | POS                                        | POS                                        | POS                           | POS                                     | POS                                     | POS                                                     | NEG                                                     | NEG                    | NEG                    | NEG                                        | POS                                        | POS  | NEG              |
| Riyadh-3055366                                           | POS                                        | POS                                        | POS                           | POS                                     | POS                                     | POS                                                     | NEG                                                     | NEG                    | NEG                    | NEG                                        | POS                                        | POS  | NEG              |
| Riyadh-3082712                                           | POS                                        | POS                                        | POS                           | POS                                     | POS                                     | POS                                                     | NEG                                                     | NEG                    | NEG                    | NEG                                        | POS                                        | POS  | NEG              |
| Riyadh-3087502                                           | NEG                                        | NEG                                        | POS                           | POS                                     | POS                                     | POS                                                     | NEG                                                     | NEG                    | NEG                    | NEG                                        | POS                                        | POS  | NEG              |
| Riyadh-6                                                 | POS                                        | POS                                        | POS                           | POS                                     | POS                                     | POS                                                     | NEG                                                     | NEG                    | NEG                    | NEG                                        | POS                                        | POS  | NEG              |
| Riyadh-7                                                 | POS                                        | POS                                        | POS                           | POS                                     | POS                                     | POS                                                     | NEG                                                     | NEG                    | NEG                    | NEG                                        | POS                                        | POS  | NEG              |
| Riyadh-8                                                 | POS                                        | POS                                        | POS                           | POS                                     | POS                                     | POS                                                     | NEG                                                     | NEG                    | NEG                    | NEG                                        | POS                                        | POS  | NEG              |
| <b>CC30-MRSA-IV [PVL+], Southwest Pacific Clone</b>      | POS                                        | POS                                        | POS                           | POS                                     | POS                                     | POS                                                     | NEG                                                     | NEG                    | NEG                    | NEG                                        | POS                                        | POS  | NEG              |
| Riyadh-10                                                | POS                                        | POS                                        | POS                           | POS                                     | POS                                     | POS                                                     | NEG                                                     | NEG                    | NEG                    | NEG                                        | POS                                        | POS  | NEG              |
| Riyadh_IC_123                                            | POS                                        | POS                                        | POS                           | POS                                     | POS                                     | POS                                                     | NEG                                                     | NEG                    | NEG                    | NEG                                        | POS                                        | POS  | NEG              |
| Riyadh-3080713                                           | POS                                        | POS                                        | POS                           | POS                                     | POS                                     | POS                                                     | NEG                                                     | NEG                    | NEG                    | NEG                                        | POS                                        | POS  | NEG              |
| Riyadh-2803856                                           | POS                                        | POS                                        | POS                           | POS                                     | POS                                     | POS                                                     | NEG                                                     | NEG                    | NEG                    | NEG                                        | POS                                        | POS  | NEG              |
| Riyadh-2817276-1                                         | POS                                        | POS                                        | POS                           | POS                                     | POS                                     | POS                                                     | NEG                                                     | NEG                    | NEG                    | NEG                                        | POS                                        | POS  | NEG              |
| Riyadh-2817571-2                                         | POS                                        | POS                                        | POS                           | POS                                     | POS                                     | POS                                                     | NEG                                                     | NEG                    | NEG                    | NEG                                        | POS                                        | POS  | NEG              |
| Riyadh-3033868                                           | POS                                        | POS                                        | POS                           | POS                                     | POS                                     | POS                                                     | NEG                                                     | NEG                    | NEG                    | NEG                                        | POS                                        | POS  | NEG              |
| Riyadh-2550108                                           | POS                                        | POS                                        | POS                           | POS                                     | POS                                     | POS                                                     | NEG                                                     | NEG                    | NEG                    | NEG                                        | POS                                        | POS  | NEG              |
| Riyadh-3095056-2                                         | POS                                        | POS                                        | POS                           | POS                                     | POS                                     | POS                                                     | NEG                                                     | NEG                    | NEG                    | NEG                                        | POS                                        | POS  | NEG              |
| Riyadh-2819899                                           | POS                                        | POS                                        | POS                           | POS                                     | POS                                     | POS                                                     | NEG                                                     | NEG                    | NEG                    | NEG                                        | POS                                        | POS  | NEG              |
| Riyadh-2821805                                           | POS                                        | POS                                        | POS                           | POS                                     | POS                                     | POS                                                     | NEG                                                     | NEG                    | NEG                    | NEG                                        | POS                                        | POS  | NEG              |
| Riyadh-3013928                                           | POS                                        | POS                                        | POS                           | POS                                     | POS                                     | POS                                                     | NEG                                                     | NEG                    | NEG                    | NEG                                        | POS                                        | POS  | NEG              |
| Riyadh-3029402                                           | POS                                        | POS                                        | POS                           | POS                                     | POS                                     | POS                                                     | NEG                                                     | NEG                    | NEG                    | NEG                                        | POS                                        | POS  | NEG              |
| <b>CC45/agr IV-MRSA-IV, WA MRSA-23</b>                   | POS                                        | NEG                                        | POS                           | POS                                     | NEG                                     | NEG                                                     | NEG                                                     | NEG                    | NEG                    | NEG                                        | POS                                        | POS  | NEG              |
| Riyadh-3081378-1                                         | POS                                        | NEG                                        | POS                           | POS                                     | NEG                                     | NEG                                                     | NEG                                                     | NEG                    | NEG                    | NEG                                        | POS                                        | POS  | NEG              |
| <b>CC80-MRSA-IV</b>                                      | POS                                        | POS                                        | POS                           | POS                                     | NEG                                     | NEG                                                     | NEG                                                     | NEG                    | POS                    | POS                                        | POS                                        | POS  | NEG              |
| Riyadh-3107635                                           | POS                                        | POS                                        | POS                           | POS                                     | NEG                                     | NEG                                                     | NEG                                                     | NEG                    | POS                    | POS                                        | POS                                        | POS  | NEG              |
| Riyadh-2987458                                           | POS                                        | POS                                        | POS                           | POS                                     | NEG                                     | NEG                                                     | NEG                                                     | NEG                    | POS                    | POS                                        | POS                                        | POS  | NEG              |
| <b>CC80-MRSA-IV [PVL+], European caMRSA Clone</b>        | POS                                        | POS                                        | AMB                           | POS                                     | POS                                     | POS                                                     | NEG                                                     | NEG                    | NEG                    | NEG                                        | POS                                        | POS  | NEG              |
| Riyadh-2988048                                           | POS                                        | POS                                        | AMB                           | POS                                     | POS                                     | POS                                                     | NEG                                                     | NEG                    | NEG                    | NEG                                        | POS                                        | POS  | NEG              |
| Riyadh-2990585-2                                         | POS                                        | POS                                        | AMB                           | POS                                     | POS                                     | POS                                                     | NEG                                                     | NEG                    | NEG                    | NEG                                        | POS                                        | POS  | NEG              |
| Riyadh-2990585-1                                         | POS                                        | POS                                        | POS                           | POS                                     | POS                                     | POS                                                     | NEG                                                     | NEG                    | NEG                    | NEG                                        | POS                                        | POS  | NEG              |
| Riyadh-2826033                                           | POS                                        | POS                                        | POS                           | POS                                     | POS                                     | POS                                                     | NEG                                                     | NEG                    | NEG                    | NEG                                        | POS                                        | POS  | NEG              |
| Riyadh-1601562                                           | POS                                        | POS                                        | POS                           | POS                                     | POS                                     | POS                                                     | NEG                                                     | NEG                    | NEG                    | NEG                                        | POS                                        | POS  | NEG              |
| Riyadh-2569940                                           | POS                                        | POS                                        | POS                           | POS                                     | POS                                     | POS                                                     | NEG                                                     | NEG                    | NEG                    | NEG                                        | POS                                        | POS  | NEG              |
| Riyadh-2571692                                           | POS                                        | POS                                        | POS                           | POS                                     | POS                                     | POS                                                     | NEG                                                     | NEG                    | NEG                    | NEG                                        | POS                                        | POS  | NEG              |
| Riyadh-2763029                                           | POS                                        | POS                                        | POS                           | POS                                     | POS                                     | POS                                                     | NEG                                                     | NEG                    | NEG                    | NEG                                        | POS                                        | POS  | NEG              |
| Riyadh-2767090                                           | POS                                        | POS                                        | POS                           | POS                                     | POS                                     | POS                                                     | NEG                                                     | NEG                    | NEG                    | NEG                                        | POS                                        | POS  | NEG              |
| Riyadh-2775130                                           | POS                                        | POS                                        | AMB                           | POS                                     | POS                                     | POS                                                     | NEG                                                     | NEG                    | NEG                    | NEG                                        | POS                                        | POS  | NEG              |
| Riyadh-2778256                                           | POS                                        | POS                                        | POS                           | POS                                     | POS                                     | POS                                                     | NEG                                                     | NEG                    | NEG                    | NEG                                        | POS                                        | POS  | NEG              |
| Riyadh-2817505                                           | POS                                        | POS                                        | POS                           | POS                                     | POS                                     | POS                                                     | NEG                                                     | NEG                    | NEG                    | NEG                                        | POS                                        | POS  | NEG              |
| Riyadh-3024912                                           | POS                                        | POS                                        | AMB                           | POS                                     | POS                                     | POS                                                     | NEG                                                     | NEG                    | NEG                    | NEG                                        | POS                                        | POS  | NEG              |
| Riyadh-2786990                                           | POS                                        | POS                                        | AMB                           | POS                                     | POS                                     | POS                                                     | NEG                                                     | NEG                    | NEG                    | NEG                                        | POS                                        | POS  | NEG              |
| Riyadh-2829034                                           | POS                                        | POS                                        | POS                           | POS                                     | POS                                     | POS                                                     | NEG                                                     | NEG                    | NEG                    | NEG                                        | POS                                        | POS  | NEG              |
| Riyadh-3                                                 | POS                                        | POS                                        | POS                           | POS                                     | POS                                     | POS                                                     | NEG                                                     | NEG                    | NEG                    | NEG                                        | POS                                        | POS  | NEG              |
| Riyadh-5                                                 | POS                                        | POS                                        | POS                           | POS                                     | POS                                     | POS                                                     | NEG                                                     | NEG                    | NEG                    | NEG                                        | POS                                        | POS  | NEG              |
| Riyadh-2553167                                           | POS                                        | POS                                        | POS                           | POS                                     | POS                                     | POS                                                     | NEG                                                     | NEG                    | NEG                    | NEG                                        | POS                                        | POS  | NEG              |
| Riyadh-3002592                                           | POS                                        | POS                                        | POS                           | POS                                     | POS                                     | POS                                                     | NEG                                                     |                        |                        |                                            |                                            |      |                  |

|                                                          | VIRULENCE : HAEMOLYSINS   |                  |                           |                         |                 |              |              | VIRULENCE : HLB-CONV PHAGES |                |                                       |                               |
|----------------------------------------------------------|---------------------------|------------------|---------------------------|-------------------------|-----------------|--------------|--------------|-----------------------------|----------------|---------------------------------------|-------------------------------|
|                                                          | hl                        | hla              | hlll (cons)               | hlll (other than RF122) | hllb-probe 1    | hllb-probe 2 | hllb-probe 3 | un-truncated hlb            | sak            | chp                                   | scn                           |
|                                                          | putative membrane protein | haemolysin alpha | putative membrane protein |                         | haemolysin beta |              |              |                             | staphylokinase | chemotaxis-inhibiting protein (CHIPS) | Staphyl. Complement inhibitor |
| <b>CC1-MRSA-IV&amp;SCCFus, WA MRSA-1/45</b>              |                           |                  |                           |                         |                 |              |              |                             |                |                                       |                               |
| Riyadh-3108609                                           | POS                       | POS              | POS                       | POS                     | POS             | POS          | POS          | AMB                         | POS            | NEG                                   | POS                           |
| Riyadh-2913235                                           | POS                       | POS              | POS                       | POS                     | POS             | POS          | POS          | AMB                         | POS            | NEG                                   | POS                           |
| <b>CC1/ST772-MRSA-V [PVL+], "Bengal Bay Clone/WA 1"</b>  |                           |                  |                           |                         |                 |              |              |                             |                |                                       |                               |
| Riyadh-2819026                                           | POS                       | POS              | POS                       | POS                     | AMB             | NEG          | POS          | POS                         | NEG            | AMB                                   | POS                           |
| <b>CC5-MRSA-IV, Paediatric clone</b>                     |                           |                  |                           |                         |                 |              |              |                             |                |                                       |                               |
| Riyadh-2915327-1                                         | POS                       | POS              | POS                       | POS                     | POS             | POS          | POS          | NEG                         | POS            | POS                                   | POS                           |
| Riyadh-2915327-2                                         | POS                       | POS              | POS                       | POS                     | POS             | POS          | POS          | AMB                         | POS            | NEG                                   | AMB                           |
| Riyadh-2                                                 | POS                       | POS              | POS                       | POS                     | POS             | POS          | POS          | NEG                         | POS            | POS                                   | POS                           |
| <b>CC5-MRSA-IV [PVL+], Paediatric clone</b>              |                           |                  |                           |                         |                 |              |              |                             |                |                                       |                               |
| Riyadh-2986666                                           | POS                       | POS              | POS                       | POS                     | POS             | POS          | POS          | AMB                         | POS            | AMB                                   | POS                           |
| Riyadh-2913235                                           | POS                       | POS              | POS                       | POS                     | POS             | POS          | POS          | AMB                         | POS            | NEG                                   | POS                           |
| <b>CC5-MRSA-IVvar, "Maltese Clone"</b>                   |                           |                  |                           |                         |                 |              |              |                             |                |                                       |                               |
| Riyadh-2983654                                           | POS                       | POS              | POS                       | POS                     | POS             | POS          | POS          | AMB                         | POS            | NEG                                   | POS                           |
| Riyadh-4                                                 | POS                       | POS              | POS                       | POS                     | POS             | POS          | POS          | NEG                         | POS            | NEG                                   | POS                           |
| Riyadh-2790233                                           | POS                       | POS              | POS                       | POS                     | POS             | POS          | POS          | NEG                         | POS            | NEG                                   | POS                           |
| <b>CC5-MRSA-V</b>                                        |                           |                  |                           |                         |                 |              |              |                             |                |                                       |                               |
| Riyadh-2568944                                           | POS                       | POS              | POS                       | POS                     | POS             | POS          | POS          | NEG                         | POS            | AMB                                   | POS                           |
| <b>CC6-MRSA-IV, WA MRSA-51/66</b>                        |                           |                  |                           |                         |                 |              |              |                             |                |                                       |                               |
| Riyadh-2556168                                           | POS                       | POS              | POS                       | POS                     | POS             | POS          | POS          | NEG                         | POS            | AMB                                   | POS                           |
| Riyadh-2824507                                           | POS                       | POS              | POS                       | POS                     | POS             | POS          | POS          | NEG                         | POS            | NEG                                   | POS                           |
| Riyadh-2990831                                           | POS                       | POS              | POS                       | POS                     | POS             | POS          | POS          | POS                         | POS            | AMB                                   | POS                           |
| <b>CC9/ST239-MRSA-III, Vienna/Hungarian/Brazilian Cl</b> |                           |                  |                           |                         |                 |              |              |                             |                |                                       |                               |
| Riyadh-9                                                 | POS                       | NEG              | POS                       | POS                     | POS             | POS          | POS          | AMB                         | POS            | NEG                                   | POS                           |
| Riyadh-3028763                                           | POS                       | POS              | POS                       | POS                     | POS             | POS          | POS          | AMB                         | POS            | POS                                   | POS                           |
| Riyadh-2817437                                           | POS                       | POS              | POS                       | POS                     | POS             | POS          | POS          | POS                         | POS            | POS                                   | POS                           |
| Riyadh-2793706                                           | POS                       | POS              | POS                       | POS                     | POS             | POS          | POS          | AMB                         | POS            | POS                                   | POS                           |
| Riyadh-2818797                                           | POS                       | POS              | POS                       | POS                     | POS             | POS          | POS          | NEG                         | POS            | POS                                   | POS                           |
| Riyadh-2822825                                           | POS                       | POS              | POS                       | POS                     | POS             | POS          | POS          | POS                         | POS            | POS                                   | POS                           |
| Riyadh-2888905                                           | POS                       | POS              | POS                       | POS                     | POS             | POS          | POS          | AMB                         | POS            | POS                                   | POS                           |
| Riyadh-2888915                                           | POS                       | POS              | POS                       | POS                     | POS             | POS          | POS          | NEG                         | POS            | POS                                   | POS                           |
| Riyadh-2567782                                           | POS                       | POS              | POS                       | POS                     | POS             | POS          | POS          | NEG                         | POS            | POS                                   | POS                           |
| Riyadh-2891670                                           | POS                       | POS              | POS                       | POS                     | POS             | POS          | POS          | AMB                         | POS            | POS                                   | POS                           |
| Riyadh-3006920                                           | POS                       | POS              | POS                       | POS                     | POS             | POS          | POS          | AMB                         | POS            | POS                                   | POS                           |
| Riyadh-2817276-1                                         | POS                       | POS              | POS                       | POS                     | POS             | POS          | POS          | AMB                         | POS            | POS                                   | POS                           |
| Riyadh-0295102                                           | POS                       | POS              | POS                       | POS                     | POS             | POS          | POS          | AMB                         | POS            | POS                                   | POS                           |
| Riyadh-2820597                                           | POS                       | POS              | POS                       | POS                     | POS             | POS          | POS          | POS                         | POS            | POS                                   | POS                           |
| Riyadh-2822088                                           | POS                       | POS              | POS                       | POS                     | POS             | POS          | POS          | POS                         | POS            | POS                                   | POS                           |
| Riyadh-3010092                                           | POS                       | POS              | POS                       | POS                     | POS             | POS          | POS          | AMB                         | POS            | POS                                   | POS                           |
| Riyadh-3022844                                           | POS                       | POS              | POS                       | POS                     | POS             | POS          | POS          | AMB                         | POS            | POS                                   | POS                           |
| Riyadh-3108214-2                                         | POS                       | POS              | POS                       | POS                     | POS             | POS          | POS          | NEG                         | POS            | POS                                   | POS                           |
| Riyadh-2823926                                           | POS                       | POS              | POS                       | POS                     | POS             | POS          | POS          | AMB                         | POS            | POS                                   | POS                           |
| Riyadh-1                                                 | POS                       | POS              | POS                       | POS                     | POS             | POS          | POS          | AMB                         | POS            | POS                                   | POS                           |
| Riyadh-2818388                                           | POS                       | POS              | POS                       | POS                     | POS             | POS          | POS          | AMB                         | POS            | POS                                   | POS                           |
| Riyadh-3112315                                           | POS                       | POS              | POS                       | POS                     | POS             | POS          | POS          | POS                         | POS            | POS                                   | POS                           |
| <b>CC9/ST834-MRSA-(atypical SCCmec )</b>                 |                           |                  |                           |                         |                 |              |              |                             |                |                                       |                               |
| Riyadh-3103521                                           | POS                       | POS              | POS                       | POS                     | POS             | POS          | POS          | NEG                         | POS            | POS                                   | POS                           |
| <b>CC22-MRSA-IV, Barnim/UK-EMRSA-15</b>                  |                           |                  |                           |                         |                 |              |              |                             |                |                                       |                               |
| Riyadh-2553350                                           | POS                       | POS              | NEG                       | NEG                     | POS             | POS          | POS          | NEG                         | POS            | POS                                   | POS                           |
| Riyadh-2571758                                           | POS                       | POS              | NEG                       | NEG                     | POS             | POS          | POS          | AMB                         | POS            | POS                                   | POS                           |
| Riyadh-3029203                                           | POS                       | POS              | NEG                       | NEG                     | POS             | POS          | POS          | NEG                         | POS            | POS                                   | POS                           |
| Riyadh-3039785                                           | POS                       | POS              | NEG                       | NEG                     | POS             | POS          | POS          | NEG                         | POS            | POS                                   | POS                           |
| Riyadh-3105594                                           | POS                       | POS              | NEG                       | NEG                     | POS             | POS          | POS          | NEG                         | POS            | POS                                   | POS                           |
| Riyadh_IC_204-2                                          | POS                       | POS              | NEG                       | NEG                     | POS             | POS          | POS          | AMB                         | POS            | POS                                   | POS                           |
| Riyadh-3003974                                           | POS                       | POS              | NEG                       | NEG                     | POS             | POS          | POS          | NEG                         | POS            | POS                                   | POS                           |
| Riyadh_IC_067                                            | POS                       | POS              | NEG                       | NEG                     | POS             | POS          | POS          | POS                         | NEG            | AMB                                   | NEG                           |
| Riyadh-2988627                                           | POS                       | POS              | NEG                       | NEG                     | POS             | POS          | POS          | AMB                         | POS            | POS                                   | POS                           |
| Riyadh-3112581                                           | POS                       | POS              | NEG                       | NEG                     | POS             | POS          | POS          | NEG                         | POS            | POS                                   | POS                           |
| <b>CC22-MRSA-IV [PVL+]</b>                               |                           |                  |                           |                         |                 |              |              |                             |                |                                       |                               |
| Riyadh-2781996-1                                         | POS                       | POS              | NEG                       | NEG                     | POS             | POS          | POS          | NEG                         | POS            | POS                                   | POS                           |
| Riyadh-3103432                                           | POS                       | POS              | NEG                       | NEG                     | POS             | POS          | POS          | NEG                         | POS            | POS                                   | POS                           |
| Riyadh-3026502                                           | POS                       | AMB              | NEG                       | NEG                     | POS             | POS          | POS          | NEG                         | POS            | POS                                   | POS                           |
| Riyadh-3081378-2                                         | POS                       | POS              | NEG                       | NEG                     | POS             | POS          | POS          | AMB                         | POS            | POS                                   | POS                           |
| Riyadh_IC_185                                            | POS                       | POS              | AMB                       | NEG                     | POS             | POS          | POS          | AMB                         | POS            | POS                                   | POS                           |
| Riyadh_IC_204-1                                          | POS                       | POS              | NEG                       | NEG                     | POS             | POS          | POS          | AMB                         | POS            | POS                                   | POS                           |
| Riyadh-3159371                                           | POS                       | POS              | NEG                       | NEG                     | POS             | POS          | POS          | NEG                         | POS            | POS                                   | POS                           |
| Riyadh-2753975                                           | POS                       | POS              | NEG                       | NEG                     | POS             | POS          | POS          | NEG                         | POS            | POS                                   | POS                           |
| Riyadh-2775605                                           | POS                       | POS              | NEG                       | NEG                     | POS             | POS          | POS          | NEG                         | POS            | POS                                   | POS                           |
| Riyadh-2781996-2                                         | POS                       | POS              | NEG                       | NEG                     | POS             | POS          | POS          | NEG                         | POS            | POS                                   | POS                           |
| Riyadh-2823783-2                                         | POS                       | POS              | NEG                       | NEG                     | POS             | POS          | POS          | AMB                         | POS            | POS                                   | POS                           |
| Riyadh-2876001                                           | POS                       | POS              | NEG                       | NEG                     | POS             | POS          | POS          | NEG                         | POS            | POS                                   | POS                           |
| Riyadh-3036074                                           | POS                       | POS              | NEG                       | NEG                     | POS             | POS          | POS          | AMB                         | POS            | POS                                   | POS                           |
| Riyadh-3053099                                           | POS                       | POS              | NEG                       | NEG                     | POS             | POS          | POS          | NEG                         | POS            | POS                                   | POS                           |
| Riyadh-3055366                                           | POS                       | POS              | NEG                       | NEG                     | POS             | POS          | POS          | NEG                         | POS            | POS                                   | POS                           |
| Riyadh-3082712                                           | POS                       | POS              | NEG                       | NEG                     | POS             | POS          | POS          | NEG                         | POS            | POS                                   | POS                           |
| Riyadh-3087502                                           | POS                       | POS              | AMB                       | NEG                     | POS             | POS          | POS          | NEG                         | POS            | POS                                   | POS                           |
| Riyadh-6                                                 | POS                       | POS              | NEG                       | NEG                     | POS             | POS          | POS          | NEG                         | POS            | POS                                   | POS                           |
| Riyadh-7                                                 | POS                       | POS              | NEG                       | NEG                     | POS             | POS          | POS          | NEG                         | POS            | POS                                   | POS                           |
| Riyadh-8                                                 | POS                       | POS              | NEG                       | NEG                     | POS             | POS          | POS          | NEG                         | POS            | POS                                   | POS                           |
| <b>CC30-MRSA-IV [PVL+], Southwest Pacific Clone</b>      |                           |                  |                           |                         |                 |              |              |                             |                |                                       |                               |
| Riyadh-10                                                | POS                       | POS              | POS                       | POS                     | POS             | POS          | POS          | NEG                         | POS            | POS                                   | POS                           |
| Riyadh_IC_123                                            | POS                       | POS              | POS                       | POS                     | POS             | POS          | POS          | AMB                         | POS            | POS                                   | POS                           |
| Riyadh-3080713                                           | POS                       | POS              | POS                       | POS                     | POS             | POS          | POS          | AMB                         | POS            | POS                                   | POS                           |
| Riyadh-2803856                                           | POS                       | POS              | POS                       | POS                     | POS             | POS          | POS          | POS                         | POS            | POS                                   | POS                           |
| Riyadh-2817276-1                                         | POS                       | POS              | POS                       | POS                     | POS             | POS          | POS          | POS                         | POS            | POS                                   | POS                           |
| Riyadh-2817571-2                                         | POS                       | POS              | POS                       | POS                     | POS             | POS          | POS          | POS                         | POS            | POS                                   | POS                           |
| Riyadh-3033868                                           | POS                       | POS              | POS                       | POS                     | AMB             | POS          | AMB          | NEG                         | POS            | POS                                   | POS                           |
| Riyadh-2550108                                           | POS                       | POS              | POS                       | POS                     | POS             | POS          | POS          | AMB                         | POS            | POS                                   | POS                           |
| Riyadh-3095056-2                                         | POS                       | POS              | POS                       | POS                     | POS             | POS          | POS          | NEG                         | POS            | POS                                   | POS                           |
| Riyadh-2819899                                           | POS                       | POS              | POS                       | POS                     | POS             | POS          | POS          | AMB                         | POS            | POS                                   | POS                           |
| Riyadh-2821805                                           | POS                       | POS              | POS                       | POS                     | AMB             | AMB          | AMB          | NEG                         | POS            | POS                                   | POS                           |
| Riyadh-3013928                                           | POS                       | POS              | POS                       | POS                     | POS             | POS          | POS          | AMB                         | POS            | POS                                   | POS                           |
| Riyadh-3029402                                           | POS                       | POS              | POS                       | POS                     | POS             | POS          | POS          | AMB                         | POS            | POS                                   | POS                           |
| <b>CC45/agr IV-MRSA-IV, WA MRSA-23</b>                   |                           |                  |                           |                         |                 |              |              |                             |                |                                       |                               |
| Riyadh-3081378-1                                         | POS                       | POS              | POS                       | NEG                     | NEG             | NEG          | NEG          | NEG                         | POS            | POS                                   | POS                           |
| <b>CC80-MRSA-IV</b>                                      |                           |                  |                           |                         |                 |              |              |                             |                |                                       |                               |
| Riyadh-3107635                                           | POS                       | POS              | POS                       | POS                     | NEG             | POS          | NEG          | NEG                         | POS            | NEG                                   | POS                           |
| Riyadh-2987458                                           | POS                       | POS              | POS                       | POS                     | POS             | POS          | POS          | NEG                         | POS            | POS                                   | POS                           |
| <b>CC80-MRSA-IV [PVL+], European caMRSA Clone</b>        |                           |                  |                           |                         |                 |              |              |                             |                |                                       |                               |
| Riyadh-2988048                                           | POS                       | POS              | POS                       | POS                     | AMB             | POS          | NEG          | NEG                         | POS            | NEG                                   | POS                           |
| Riyadh-2990585-2                                         | POS                       | POS              | POS                       | POS                     | AMB             | POS          | NEG          | NEG                         | POS            | NEG                                   | POS                           |
| Riyadh-2990585-1                                         | POS                       | POS              | POS                       | POS                     | POS             | POS          | NEG          | AMB                         | POS            | NEG                                   | POS                           |
| Riyadh-2826033                                           | POS                       | POS              | POS                       | POS                     | POS             | POS          | NEG          | AMB                         | POS            | NEG                                   | POS                           |
| Riyadh-1601562                                           | POS                       | POS              | POS                       | POS                     | POS             | POS          | NEG          | NEG                         | POS            | NEG                                   | POS                           |
| Riyadh-2569940                                           | POS                       | POS              | POS                       | POS                     | POS             | POS          | AMB          | AMB                         | POS            | AMB                                   | POS                           |
| Riyadh-2571692                                           | POS                       | POS              | POS                       | POS                     | POS             | POS          | NEG          | AMB                         | POS            | AMB                                   | POS                           |
| Riyadh-2763029                                           | POS                       | POS              | POS                       | POS                     | AMB             | POS          | NEG          | AMB                         | POS            | NEG                                   | POS                           |
| Riyadh-2767090                                           | POS                       | POS              | POS                       | POS                     | AMB             | POS          | NEG          | NEG                         | POS            | NEG                                   | POS                           |
| Riyadh-2775130                                           | POS                       | POS              | POS                       | POS                     | AMB             | POS          | NEG          | NEG                         | POS            | NEG                                   | POS                           |
| Riyadh-2778256                                           | POS                       | POS              | POS                       | POS                     | POS             | POS          | NEG          | NEG                         | POS            | NEG                                   | POS                           |
| Riyadh-2817505                                           | POS                       | POS              | POS                       | POS                     | POS             | POS          | AMB          | AMB                         | POS            | NEG                                   | POS                           |
| Riyadh-3024912                                           | POS                       | POS              | POS                       | POS                     | AMB             | POS          | NEG          | NEG                         | POS            | NEG                                   | POS                           |
| Riyadh-2788690                                           | POS                       | POS              | POS                       | POS                     | AMB             | POS          | NEG          | NEG                         | POS            | NEG                                   | POS                           |
| Riyadh-3292034                                           | POS                       | POS              | POS                       | POS                     | POS             | POS          | NEG          | AMB                         | POS            | AMB                                   | POS                           |
| Riyadh-3                                                 | POS                       | POS              | POS                       | POS                     | NEG             | POS          | NEG          | NEG                         | POS            | AMB                                   | POS                           |
| Riyadh-5                                                 | POS                       | POS              | POS                       | POS                     | POS             | POS          | NEG          | AMB                         | POS            | AMB                                   | POS                           |
| Riyadh-2553167                                           | POS                       | POS              | POS                       | POS                     | POS             | POS          | POS          | NEG                         | POS            | AMB                                   | POS                           |
| Riyadh-3002592                                           | POS                       | POS              | POS                       | POS                     | POS             | POS          | POS          | AMB                         | POS            | NEG                                   | POS                           |
| <b>CC88-MRSA-IV [PVL+]</b>                               |                           |                  |                           |                         |                 |              |              |                             |                |                                       |                               |
| Riyadh-2736996                                           | POS                       | POS              | POS                       | POS                     | POS             | POS          | POS          | POS                         | NEG            | NEG                                   | NEG                           |
| Riyadh-2942396                                           | POS                       | POS              | POS                       | POS                     | POS             | POS          | POS          | AMB                         | POS            | POS                                   | POS                           |
| Riyadh-3105391                                           | POS                       | POS              | POS                       | POS                     | POS             | POS          | POS          | NEG                         | POS            | POS                                   | POS                           |
| <b>CC97-MRSA-V</b>                                       |                           |                  |                           |                         |                 |              |              |                             |                |                                       |                               |
| Riyadh-0297622                                           | POS                       | POS              | POS                       | POS                     | POS             | POS          | POS          | NEG                         | POS            | NEG                                   | POS                           |
| Riyadh-3025471                                           | POS                       | POS              | POS                       | POS                     | POS             | POS          | POS          | POS                         | POS            | AMB                                   | POS                           |



|                                                          | VIRULENCE : PROTEASES |                          |               |                      |                      |                      |                           |                           |                                           |                        |
|----------------------------------------------------------|-----------------------|--------------------------|---------------|----------------------|----------------------|----------------------|---------------------------|---------------------------|-------------------------------------------|------------------------|
|                                                          | aur (cons)            | aur (Other than MRSA252) | aur (MRSA252) | splA                 | splB                 | splE                 | sspA                      | sspB                      | sspP (cons)                               | sspP (other than ST93) |
|                                                          | aureolysin            |                          |               | serin-<br>protease A | serin-<br>protease B | serin-<br>protease E | glutamylend<br>opeptidase | staphopain B,<br>protease | staphopain A (staphyloain<br>A), protease |                        |
| <b>CC1-MRSA-IV&amp;SCCFus, WA MRSA-1/45</b>              |                       |                          |               |                      |                      |                      |                           |                           |                                           |                        |
| Riyadh-3108609                                           | POS                   | POS                      | NEG           | POS                  | POS                  | POS                  | POS                       | POS                       | POS                                       | POS                    |
| <b>CC1/ST772-MRSA-V [PVL+], "Bengal Bay Clone/WA1"</b>   |                       |                          |               |                      |                      |                      |                           |                           |                                           |                        |
| Riyadh-2819026                                           | POS                   | POS                      | NEG           | NEG                  | NEG                  | NEG                  | POS                       | POS                       | POS                                       | POS                    |
| <b>CC5-MRSA-IV, Paediatric clone</b>                     |                       |                          |               |                      |                      |                      |                           |                           |                                           |                        |
| Riyadh-2915327-1                                         | POS                   | POS                      | NEG           | POS                  | POS                  | NEG                  | POS                       | POS                       | POS                                       | POS                    |
| Riyadh-2915327-2                                         | POS                   | POS                      | NEG           | POS                  | POS                  | NEG                  | POS                       | POS                       | POS                                       | POS                    |
| Riyadh-2                                                 | POS                   | POS                      | NEG           | POS                  | POS                  | NEG                  | POS                       | POS                       | POS                                       | POS                    |
| <b>CC5-MRSA-IV [PVL+], Paediatric clone</b>              |                       |                          |               |                      |                      |                      |                           |                           |                                           |                        |
| Riyadh-2986666                                           | POS                   | POS                      | NEG           | POS                  | POS                  | NEG                  | POS                       | POS                       | POS                                       | POS                    |
| Riyadh-2913235                                           | POS                   | POS                      | NEG           | POS                  | POS                  | NEG                  | POS                       | POS                       | POS                                       | POS                    |
| <b>CC5-MRSA-IVvar, "Maltese Clone"</b>                   |                       |                          |               |                      |                      |                      |                           |                           |                                           |                        |
| Riyadh-2983654                                           | POS                   | POS                      | NEG           | POS                  | POS                  | NEG                  | POS                       | POS                       | POS                                       | POS                    |
| Riyadh-4                                                 | POS                   | POS                      | NEG           | POS                  | POS                  | NEG                  | POS                       | POS                       | POS                                       | POS                    |
| Riyadh-2790233                                           | POS                   | POS                      | NEG           | POS                  | POS                  | NEG                  | POS                       | POS                       | POS                                       | POS                    |
| <b>CC5-MRSA-V</b>                                        |                       |                          |               |                      |                      |                      |                           |                           |                                           |                        |
| Riyadh-2568944                                           | POS                   | POS                      | NEG           | POS                  | POS                  | NEG                  | POS                       | POS                       | POS                                       | POS                    |
| <b>CC6-MRSA-IV, WA MRSA-51/66</b>                        |                       |                          |               |                      |                      |                      |                           |                           |                                           |                        |
| Riyadh-2556168                                           | POS                   | POS                      | NEG           | POS                  | POS                  | POS                  | POS                       | POS                       | POS                                       | POS                    |
| Riyadh-2824507                                           | POS                   | POS                      | NEG           | POS                  | POS                  | POS                  | POS                       | POS                       | POS                                       | POS                    |
| Riyadh-2990831                                           | POS                   | POS                      | NEG           | POS                  | POS                  | POS                  | POS                       | POS                       | POS                                       | POS                    |
| <b>CC9/ST239-MRSA-III, Vienna/Hungarian/Brazilian Cl</b> |                       |                          |               |                      |                      |                      |                           |                           |                                           |                        |
| Riyadh-9                                                 | POS                   | NEG                      | POS           | POS                  | POS                  | POS                  | POS                       | POS                       | POS                                       | POS                    |
| Riyadh-3028763                                           | POS                   | NEG                      | POS           | POS                  | POS                  | NEG                  | POS                       | POS                       | POS                                       | POS                    |
| Riyadh-2817437                                           | POS                   | NEG                      | POS           | POS                  | POS                  | NEG                  | POS                       | POS                       | POS                                       | POS                    |
| Riyadh-2793706                                           | POS                   | NEG                      | POS           | POS                  | POS                  | NEG                  | POS                       | POS                       | POS                                       | POS                    |
| Riyadh-2818797                                           | POS                   | NEG                      | POS           | POS                  | POS                  | NEG                  | POS                       | POS                       | POS                                       | POS                    |
| Riyadh-2822825                                           | POS                   | NEG                      | POS           | POS                  | POS                  | NEG                  | POS                       | POS                       | POS                                       | POS                    |
| Riyadh-2888905                                           | POS                   | NEG                      | POS           | POS                  | POS                  | NEG                  | POS                       | POS                       | POS                                       | POS                    |
| Riyadh-2888915                                           | POS                   | NEG                      | POS           | POS                  | POS                  | NEG                  | POS                       | POS                       | POS                                       | POS                    |
| Riyadh-2567782                                           | POS                   | NEG                      | POS           | POS                  | POS                  | NEG                  | POS                       | POS                       | POS                                       | POS                    |
| Riyadh-2891670                                           | POS                   | NEG                      | POS           | POS                  | POS                  | NEG                  | POS                       | POS                       | POS                                       | POS                    |
| Riyadh-3006920                                           | POS                   | NEG                      | POS           | POS                  | POS                  | NEG                  | POS                       | POS                       | POS                                       | POS                    |
| Riyadh-281276-1                                          | POS                   | NEG                      | POS           | POS                  | POS                  | NEG                  | POS                       | POS                       | POS                                       | POS                    |
| Riyadh-0295102                                           | POS                   | NEG                      | POS           | POS                  | POS                  | NEG                  | POS                       | POS                       | POS                                       | AMB                    |
| Riyadh-2820597                                           | POS                   | NEG                      | POS           | POS                  | POS                  | NEG                  | POS                       | POS                       | POS                                       | POS                    |
| Riyadh-2822088                                           | POS                   | NEG                      | POS           | POS                  | POS                  | NEG                  | POS                       | POS                       | POS                                       | POS                    |
| Riyadh-3010092                                           | POS                   | NEG                      | POS           | POS                  | POS                  | NEG                  | POS                       | POS                       | POS                                       | POS                    |
| Riyadh-3022844                                           | POS                   | NEG                      | POS           | POS                  | POS                  | NEG                  | POS                       | POS                       | POS                                       | POS                    |
| Riyadh-3108214-2                                         | POS                   | NEG                      | POS           | POS                  | POS                  | NEG                  | POS                       | POS                       | POS                                       | POS                    |
| Riyadh-2823926                                           | POS                   | NEG                      | POS           | POS                  | POS                  | NEG                  | POS                       | POS                       | POS                                       | POS                    |
| Riyadh-1                                                 | POS                   | NEG                      | POS           | POS                  | POS                  | NEG                  | POS                       | POS                       | POS                                       | POS                    |
| Riyadh-2818388                                           | POS                   | NEG                      | POS           | POS                  | POS                  | NEG                  | POS                       | POS                       | POS                                       | POS                    |
| Riyadh-3112115                                           | POS                   | NEG                      | POS           | POS                  | POS                  | NEG                  | POS                       | POS                       | POS                                       | POS                    |
| <b>CC9/ST834-MRSA-(atypical SCCmec)</b>                  |                       |                          |               |                      |                      |                      |                           |                           |                                           |                        |
| Riyadh-3103521                                           | POS                   | POS                      | NEG           | POS                  | POS                  | POS                  | POS                       | POS                       | POS                                       | POS                    |
| <b>CC22-MRSA-IV, Barnim/UK-EMRSA-15</b>                  |                       |                          |               |                      |                      |                      |                           |                           |                                           |                        |
| Riyadh-2553350                                           | POS                   | NEG                      | POS           | NEG                  | NEG                  | NEG                  | POS                       | POS                       | POS                                       | POS                    |
| Riyadh-2571758                                           | POS                   | NEG                      | POS           | NEG                  | NEG                  | NEG                  | POS                       | POS                       | POS                                       | POS                    |
| Riyadh-3029203                                           | POS                   | NEG                      | POS           | NEG                  | NEG                  | NEG                  | POS                       | POS                       | POS                                       | POS                    |
| Riyadh-3039785                                           | POS                   | NEG                      | POS           | NEG                  | NEG                  | NEG                  | POS                       | POS                       | POS                                       | POS                    |
| Riyadh-1105594                                           | POS                   | NEG                      | POS           | NEG                  | NEG                  | NEG                  | POS                       | POS                       | POS                                       | POS                    |
| Riyadh_IC_204-2                                          | POS                   | NEG                      | POS           | NEG                  | NEG                  | NEG                  | POS                       | POS                       | POS                                       | POS                    |
| Riyadh-3003974                                           | POS                   | NEG                      | POS           | NEG                  | NEG                  | NEG                  | POS                       | POS                       | POS                                       | POS                    |
| Riyadh_IC_067                                            | POS                   | NEG                      | POS           | NEG                  | NEG                  | NEG                  | POS                       | POS                       | POS                                       | POS                    |
| Riyadh-2988627                                           | POS                   | NEG                      | POS           | NEG                  | NEG                  | NEG                  | POS                       | POS                       | POS                                       | POS                    |
| Riyadh-3112581                                           | POS                   | NEG                      | POS           | NEG                  | NEG                  | NEG                  | POS                       | POS                       | POS                                       | POS                    |
| <b>CC22-MRSA-IV [PVL+]</b>                               |                       |                          |               |                      |                      |                      |                           |                           |                                           |                        |
| Riyadh-2781995-1                                         | POS                   | NEG                      | POS           | NEG                  | NEG                  | NEG                  | POS                       | POS                       | POS                                       | POS                    |
| Riyadh-3103421                                           | POS                   | NEG                      | POS           | NEG                  | NEG                  | NEG                  | POS                       | POS                       | POS                                       | POS                    |
| Riyadh-3028502                                           | POS                   | NEG                      | POS           | NEG                  | NEG                  | NEG                  | POS                       | POS                       | POS                                       | POS                    |
| Riyadh-3081378-2                                         | POS                   | NEG                      | POS           | NEG                  | NEG                  | NEG                  | POS                       | POS                       | POS                                       | POS                    |
| Riyadh_IC_185                                            | POS                   | NEG                      | POS           | NEG                  | NEG                  | NEG                  | POS                       | POS                       | POS                                       | POS                    |
| Riyadh_IC_204-1                                          | POS                   | NEG                      | POS           | NEG                  | NEG                  | NEG                  | POS                       | POS                       | POS                                       | POS                    |
| Riyadh-1559371                                           | POS                   | NEG                      | POS           | NEG                  | NEG                  | NEG                  | POS                       | POS                       | POS                                       | POS                    |
| Riyadh-2753975                                           | POS                   | NEG                      | POS           | NEG                  | NEG                  | NEG                  | POS                       | POS                       | POS                                       | POS                    |
| Riyadh-2775605                                           | POS                   | NEG                      | POS           | NEG                  | NEG                  | NEG                  | POS                       | POS                       | POS                                       | POS                    |
| Riyadh-2781996-2                                         | POS                   | NEG                      | POS           | NEG                  | NEG                  | NEG                  | POS                       | POS                       | POS                                       | POS                    |
| Riyadh-2822783-2                                         | POS                   | NEG                      | POS           | NEG                  | NEG                  | NEG                  | POS                       | POS                       | POS                                       | POS                    |
| Riyadh-2876001                                           | POS                   | NEG                      | POS           | NEG                  | NEG                  | NEG                  | POS                       | POS                       | POS                                       | POS                    |
| Riyadh-3036074                                           | POS                   | NEG                      | POS           | NEG                  | NEG                  | NEG                  | POS                       | POS                       | POS                                       | POS                    |
| Riyadh-3053099                                           | POS                   | NEG                      | POS           | NEG                  | NEG                  | NEG                  | POS                       | POS                       | POS                                       | POS                    |
| Riyadh-3055366                                           | POS                   | NEG                      | POS           | NEG                  | NEG                  | NEG                  | POS                       | POS                       | POS                                       | POS                    |
| Riyadh-3087712                                           | POS                   | NEG                      | POS           | NEG                  | NEG                  | NEG                  | POS                       | POS                       | POS                                       | POS                    |
| Riyadh-3087502                                           | POS                   | NEG                      | POS           | NEG                  | NEG                  | NEG                  | POS                       | POS                       | POS                                       | POS                    |
| Riyadh-6                                                 | POS                   | NEG                      | POS           | NEG                  | NEG                  | NEG                  | POS                       | POS                       | POS                                       | POS                    |
| Riyadh-7                                                 | POS                   | NEG                      | POS           | NEG                  | NEG                  | NEG                  | POS                       | POS                       | POS                                       | POS                    |
| Riyadh-8                                                 | POS                   | NEG                      | POS           | NEG                  | NEG                  | NEG                  | POS                       | POS                       | POS                                       | POS                    |
| <b>CC30-MRSA-IV [PVL+], Southwest Pacific Clone</b>      |                       |                          |               |                      |                      |                      |                           |                           |                                           |                        |
| Riyadh-10                                                | POS                   | NEG                      | POS           | NEG                  | NEG                  | POS                  | POS                       | POS                       | POS                                       | POS                    |
| Riyadh_IC_123                                            | POS                   | NEG                      | POS           | NEG                  | NEG                  | POS                  | POS                       | POS                       | POS                                       | POS                    |
| Riyadh-3080713                                           | POS                   | NEG                      | POS           | NEG                  | NEG                  | POS                  | POS                       | POS                       | POS                                       | POS                    |
| Riyadh-2803856                                           | POS                   | NEG                      | POS           | NEG                  | NEG                  | POS                  | POS                       | POS                       | POS                                       | POS                    |
| Riyadh-2817276-1                                         | POS                   | NEG                      | POS           | NEG                  | NEG                  | POS                  | POS                       | POS                       | POS                                       | POS                    |
| Riyadh-2817571-2                                         | POS                   | NEG                      | POS           | NEG                  | NEG                  | POS                  | POS                       | POS                       | POS                                       | POS                    |
| Riyadh-3033868                                           | POS                   | NEG                      | POS           | NEG                  | NEG                  | POS                  | POS                       | POS                       | POS                                       | POS                    |
| Riyadh-2550108                                           | POS                   | NEG                      | POS           | NEG                  | NEG                  | POS                  | POS                       | POS                       | POS                                       | POS                    |
| Riyadh-3095056-2                                         | POS                   | NEG                      | POS           | NEG                  | NEG                  | POS                  | POS                       | POS                       | POS                                       | POS                    |
| Riyadh-2819899                                           | POS                   | NEG                      | POS           | NEG                  | NEG                  | POS                  | POS                       | POS                       | POS                                       | POS                    |
| Riyadh-2821805                                           | POS                   | NEG                      | POS           | NEG                  | NEG                  | POS                  | POS                       | POS                       | POS                                       | POS                    |
| Riyadh-3013928                                           | POS                   | NEG                      | POS           | NEG                  | NEG                  | POS                  | POS                       | POS                       | POS                                       | POS                    |
| Riyadh-3029402                                           | POS                   | NEG                      | POS           | NEG                  | NEG                  | POS                  | POS                       | POS                       | POS                                       | POS                    |
| <b>CC45/agr IV-MRSA-IV, WA MRSA-23</b>                   |                       |                          |               |                      |                      |                      |                           |                           |                                           |                        |
| Riyadh-3081378-1                                         | POS                   | NEG                      | POS           | NEG                  | NEG                  | NEG                  | POS                       | POS                       | POS                                       | POS                    |
| <b>CC80-MRSA-IV</b>                                      |                       |                          |               |                      |                      |                      |                           |                           |                                           |                        |
| Riyadh-3107635                                           | POS                   | POS                      | NEG           | POS                  | POS                  | NEG                  | POS                       | POS                       | POS                                       | POS                    |
| Riyadh-2987458                                           | POS                   | POS                      | NEG           | POS                  | POS                  | NEG                  | POS                       | POS                       | POS                                       | POS                    |
| <b>CC80-MRSA-IV [PVL+], European caMRSA Clone</b>        |                       |                          |               |                      |                      |                      |                           |                           |                                           |                        |
| Riyadh-2988048                                           | POS                   | POS                      | NEG           | POS                  | POS                  | NEG                  | POS                       | POS                       | POS                                       | POS                    |
| Riyadh-2990585-2                                         | POS                   | POS                      | NEG           | POS                  | POS                  | NEG                  | POS                       | POS                       | POS                                       | POS                    |
| Riyadh-2990585-1                                         | POS                   | POS                      | NEG           | POS                  | POS                  | NEG                  | POS                       | POS                       | POS                                       | POS                    |
| Riyadh-2826033                                           | POS                   | POS                      | NEG           | POS                  | POS                  | NEG                  | POS                       | POS                       | POS                                       | POS                    |
| Riyadh-1601562                                           | POS                   | POS                      | NEG           | POS                  | POS                  | NEG                  | POS                       | POS                       | POS                                       | POS                    |
| Riyadh-2569940                                           | POS                   | POS                      | NEG           | POS                  | POS                  | NEG                  | POS                       | POS                       | POS                                       | POS                    |
| Riyadh-2571692                                           | POS                   | POS                      | NEG           | POS                  | POS                  | NEG                  | POS                       | POS                       | POS                                       | POS                    |
| Riyadh-2763029                                           | POS                   | POS                      | NEG           | POS                  | POS                  | NEG                  | POS                       | POS                       | POS                                       | POS                    |
| Riyadh-2767090                                           | POS                   | POS                      | NEG           | POS                  | POS                  | NEG                  | POS                       | POS                       | POS                                       | POS                    |
| Riyadh-2775130                                           | POS                   | POS                      | NEG           | POS                  | POS                  | NEG                  | POS                       | POS                       | POS                                       | POS                    |
| Riyadh-2778256                                           | POS                   | POS                      | NEG           | POS                  | POS                  | NEG                  | POS                       | POS                       | POS                                       | POS                    |
| Riyadh-2817505                                           | POS                   | POS                      | NEG           | POS                  | POS                  | NEG                  | POS                       | POS                       | POS                                       | POS                    |
| Riyadh-3024912                                           | POS                   | POS                      | NEG           | POS                  | POS                  | NEG                  | POS                       | POS                       | POS                                       | POS                    |
| Riyadh-2786990                                           | POS                   | POS                      | NEG           | POS                  | POS                  | NEG                  | POS                       | POS                       | POS                                       | POS                    |
| Riyadh-3829034                                           | POS                   | POS                      | NEG           | POS                  | POS                  | NEG                  | POS                       | POS                       | POS                                       | POS                    |
| Riyadh-3                                                 | POS                   | POS                      | NEG           | POS                  | POS                  | NEG                  | POS                       | POS                       | POS                                       | POS                    |
| Riyadh-5                                                 | POS                   | POS                      | NEG           | POS                  | POS                  | NEG                  | POS                       | POS                       | POS                                       | POS                    |
| Riyadh-2553167                                           | POS                   | POS                      | NEG           | POS                  | POS                  | NEG                  | POS                       | POS                       | POS                                       | POS                    |
| Riyadh-3002592                                           | POS                   | POS                      | NEG           | POS                  | POS                  | NEG                  | POS                       | POS                       | POS                                       | POS                    |
| <b>CC88-MRSA-IV [PVL+]</b>                               |                       |                          |               |                      |                      |                      |                           |                           |                                           |                        |
| Riyadh-2736996                                           | POS                   | POS                      | NEG           | POS                  | POS                  | NEG                  | POS                       | POS                       | POS                                       | POS                    |
| Riyadh-2942396                                           | POS                   | POS                      | NEG           | POS                  | POS                  | NEG                  | POS                       | POS                       | POS                                       | POS                    |
| Riyadh-3105391                                           | POS                   | POS                      | NEG           | POS                  | POS                  | NEG                  | POS                       | POS                       | POS                                       | POS                    |
| <b>CC97-MRSA-V</b>                                       |                       |                          |               |                      |                      |                      |                           |                           |                                           |                        |
| Riyadh-0297622                                           | POS                   | POS                      | NEG           | POS                  | POS                  | POS                  | POS                       | POS                       | POS                                       | POS                    |
| Riyadh-3025471                                           | POS                   | POS                      | NEG           | POS                  | POS                  | POS                  | POS                       | POS                       | POS                                       | POS                    |

| VIRULENCE : STAPHYLOCOCCAL SUPERANTIGEN/ENTEROTOXIN-LIKE GENES (SET/SSL) |                                            |              |              |              |              |             |                  |                        |                           |                     |                    |                            |  |
|--------------------------------------------------------------------------|--------------------------------------------|--------------|--------------|--------------|--------------|-------------|------------------|------------------------|---------------------------|---------------------|--------------------|----------------------------|--|
| setC                                                                     | set6-var1_11                               | set6-var2_11 | set6-var1_12 | set6-var2_12 | set6-var4_11 | ssl01-RF122 | ssl01/set6 (COL) | ssl01/set6 (Mu50+N315) | ssl01/set6 (MW2+MSSA 476) | ssl01/set6 (MRS252) | ssl01/set6 (RF122) | ssl01/set6 (other alleles) |  |
| staphyl. exotoxin-like protein                                           | staphylococcal superantigen-like protein 1 |              |              |              |              |             |                  |                        |                           |                     |                    |                            |  |
| <b>CC1-MRSA-IV&amp;SCCFus, WA MRSA-1/45</b>                              |                                            |              |              |              |              |             |                  |                        |                           |                     |                    |                            |  |
| Riyadh-3108609                                                           | POS                                        | NEG          | POS          | NEG          | POS          | NEG         | NEG              | NEG                    | POS                       | NEG                 | NEG                | NEG                        |  |
| Riyadh-2913235                                                           | POS                                        | NEG          | POS          | NEG          | POS          | NEG         | NEG              | NEG                    | POS                       | NEG                 | NEG                | NEG                        |  |
| <b>CC1/ST772-MRSA-V [PVL+], "Bengal Bay Clone/WA 1"</b>                  |                                            |              |              |              |              |             |                  |                        |                           |                     |                    |                            |  |
| Riyadh-2819026                                                           | POS                                        | POS          | NEG          | POS          | NEG          | POS         | NEG              | POS                    | AMB                       | NEG                 | NEG                | NEG                        |  |
| <b>CC5-MRSA-IV, Paediatric clone</b>                                     |                                            |              |              |              |              |             |                  |                        |                           |                     |                    |                            |  |
| Riyadh-2915327-1                                                         | POS                                        | POS          | NEG          | POS          | NEG          | POS         | NEG              | POS                    | NEG                       | NEG                 | NEG                | NEG                        |  |
| Riyadh-2915327-2                                                         | POS                                        | POS          | NEG          | POS          | NEG          | POS         | NEG              | POS                    | NEG                       | NEG                 | NEG                | NEG                        |  |
| Riyadh-2                                                                 | POS                                        | POS          | NEG          | POS          | NEG          | POS         | NEG              | POS                    | NEG                       | NEG                 | NEG                | NEG                        |  |
| <b>CC5-MRSA-IV [PVL+], Paediatric clone</b>                              |                                            |              |              |              |              |             |                  |                        |                           |                     |                    |                            |  |
| Riyadh-2986666                                                           | POS                                        | POS          | AMB          | POS          | AMB          | POS         | NEG              | POS                    | AMB                       | NEG                 | NEG                | NEG                        |  |
| Riyadh-2913235                                                           | POS                                        | POS          | AMB          | POS          | AMB          | POS         | NEG              | POS                    | AMB                       | NEG                 | NEG                | NEG                        |  |
| <b>CC5-MRSA-IVvar, "Maltese Clone"</b>                                   |                                            |              |              |              |              |             |                  |                        |                           |                     |                    |                            |  |
| Riyadh-2983654                                                           | POS                                        | POS          | AMB          | POS          | AMB          | POS         | NEG              | POS                    | AMB                       | NEG                 | NEG                | NEG                        |  |
| Riyadh-4                                                                 | POS                                        | POS          | NEG          | POS          | NEG          | POS         | NEG              | POS                    | NEG                       | NEG                 | NEG                | NEG                        |  |
| Riyadh-2790233                                                           | POS                                        | POS          | AMB          | POS          | NEG          | POS         | NEG              | POS                    | AMB                       | NEG                 | NEG                | NEG                        |  |
| <b>CC5-MRSA-V</b>                                                        |                                            |              |              |              |              |             |                  |                        |                           |                     |                    |                            |  |
| Riyadh-2568944                                                           | POS                                        | POS          | NEG          | POS          | NEG          | POS         | NEG              | POS                    | NEG                       | NEG                 | NEG                | NEG                        |  |
| <b>CC6-MRSA-IV, WA MRSA-51/66</b>                                        |                                            |              |              |              |              |             |                  |                        |                           |                     |                    |                            |  |
| Riyadh-2556168                                                           | POS                                        | NEG          | NEG          | AMB          | NEG          | POS         | POS              | NEG                    | NEG                       | NEG                 | NEG                | POS                        |  |
| Riyadh-2824507                                                           | POS                                        | NEG          | NEG          | AMB          | NEG          | POS         | POS              | NEG                    | NEG                       | NEG                 | NEG                | POS                        |  |
| Riyadh-2990831                                                           | POS                                        | NEG          | NEG          | POS          | NEG          | POS         | POS              | NEG                    | NEG                       | NEG                 | NEG                | POS                        |  |
| <b>CC9/ST239-MRSA-III, Vienna/Hungarian/Brazilian Cl</b>                 |                                            |              |              |              |              |             |                  |                        |                           |                     |                    |                            |  |
| Riyadh-5                                                                 | POS                                        | POS          | NEG          | POS          | NEG          | POS         | NEG              | POS                    | AMB                       | NEG                 | NEG                | NEG                        |  |
| Riyadh-3028763                                                           | POS                                        | POS          | NEG          | POS          | NEG          | POS         | NEG              | POS                    | AMB                       | NEG                 | NEG                | NEG                        |  |
| Riyadh-2817437                                                           | POS                                        | POS          | NEG          | POS          | NEG          | POS         | NEG              | POS                    | AMB                       | NEG                 | NEG                | NEG                        |  |
| Riyadh-2793706                                                           | POS                                        | POS          | NEG          | POS          | NEG          | POS         | NEG              | POS                    | AMB                       | NEG                 | NEG                | NEG                        |  |
| Riyadh-2818797                                                           | POS                                        | POS          | NEG          | POS          | NEG          | POS         | NEG              | POS                    | AMB                       | NEG                 | NEG                | NEG                        |  |
| Riyadh-2822825                                                           | POS                                        | POS          | NEG          | POS          | NEG          | POS         | NEG              | POS                    | AMB                       | NEG                 | NEG                | NEG                        |  |
| Riyadh-2888905                                                           | POS                                        | POS          | NEG          | POS          | NEG          | POS         | NEG              | POS                    | AMB                       | NEG                 | NEG                | NEG                        |  |
| Riyadh-2888915                                                           | POS                                        | POS          | NEG          | POS          | NEG          | POS         | NEG              | POS                    | AMB                       | NEG                 | NEG                | NEG                        |  |
| Riyadh-2567782                                                           | POS                                        | POS          | NEG          | POS          | NEG          | POS         | NEG              | POS                    | AMB                       | NEG                 | NEG                | NEG                        |  |
| Riyadh-2891670                                                           | POS                                        | POS          | NEG          | POS          | NEG          | POS         | NEG              | POS                    | AMB                       | NEG                 | NEG                | NEG                        |  |
| Riyadh-3006920                                                           | POS                                        | POS          | NEG          | POS          | NEG          | POS         | NEG              | POS                    | AMB                       | NEG                 | NEG                | NEG                        |  |
| Riyadh-2817276-1                                                         | POS                                        | POS          | NEG          | POS          | NEG          | POS         | NEG              | POS                    | AMB                       | NEG                 | NEG                | NEG                        |  |
| Riyadh-0295102                                                           | POS                                        | POS          | NEG          | POS          | NEG          | POS         | NEG              | POS                    | AMB                       | NEG                 | NEG                | NEG                        |  |
| Riyadh-2820597                                                           | POS                                        | POS          | NEG          | POS          | NEG          | POS         | NEG              | POS                    | AMB                       | NEG                 | NEG                | NEG                        |  |
| Riyadh-2822088                                                           | POS                                        | POS          | NEG          | POS          | NEG          | POS         | NEG              | POS                    | AMB                       | NEG                 | NEG                | NEG                        |  |
| Riyadh-3010092                                                           | POS                                        | POS          | NEG          | AMB          | NEG          | POS         | NEG              | POS                    | AMB                       | NEG                 | NEG                | NEG                        |  |
| Riyadh-3022844                                                           | POS                                        | POS          | NEG          | AMB          | NEG          | POS         | NEG              | POS                    | AMB                       | NEG                 | NEG                | NEG                        |  |
| Riyadh-3108214-2                                                         | POS                                        | POS          | NEG          | AMB          | NEG          | POS         | NEG              | POS                    | AMB                       | NEG                 | NEG                | NEG                        |  |
| Riyadh-2823926                                                           | POS                                        | POS          | NEG          | POS          | NEG          | POS         | NEG              | POS                    | AMB                       | NEG                 | NEG                | NEG                        |  |
| Riyadh-1                                                                 | POS                                        | POS          | NEG          | POS          | NEG          | POS         | NEG              | POS                    | AMB                       | NEG                 | NEG                | NEG                        |  |
| Riyadh-2818388                                                           | POS                                        | POS          | NEG          | POS          | NEG          | POS         | NEG              | POS                    | AMB                       | NEG                 | NEG                | NEG                        |  |
| Riyadh-3112315                                                           | POS                                        | POS          | NEG          | POS          | NEG          | POS         | NEG              | POS                    | AMB                       | NEG                 | NEG                | NEG                        |  |
| <b>CC9/ST834-MRSA-(atypical SCCmec)</b>                                  |                                            |              |              |              |              |             |                  |                        |                           |                     |                    |                            |  |
| Riyadh-3103521                                                           | POS                                        | NEG          | POS          | NEG          | NEG          | NEG         | NEG              | NEG                    | NEG                       | NEG                 | NEG                | POS                        |  |
| <b>CC22-MRSA-IV, Barnim/UK-EMRSA-15</b>                                  |                                            |              |              |              |              |             |                  |                        |                           |                     |                    |                            |  |
| Riyadh-2553359                                                           | POS                                        | NEG          | POS          | POS          | NEG          | NEG         | NEG              | NEG                    | NEG                       | NEG                 | POS                | NEG                        |  |
| Riyadh-2571758                                                           | POS                                        | NEG          | POS          | POS          | NEG          | NEG         | NEG              | NEG                    | NEG                       | NEG                 | POS                | NEG                        |  |
| Riyadh-3029203                                                           | POS                                        | NEG          | POS          | POS          | NEG          | NEG         | NEG              | NEG                    | NEG                       | NEG                 | POS                | NEG                        |  |
| Riyadh-3039785                                                           | POS                                        | NEG          | POS          | POS          | NEG          | NEG         | NEG              | NEG                    | NEG                       | NEG                 | POS                | NEG                        |  |
| Riyadh-1055994                                                           | POS                                        | NEG          | POS          | POS          | NEG          | NEG         | NEG              | NEG                    | NEG                       | NEG                 | POS                | NEG                        |  |
| Riyadh_IC_204-2                                                          | POS                                        | NEG          | POS          | POS          | NEG          | NEG         | NEG              | NEG                    | NEG                       | NEG                 | POS                | NEG                        |  |
| Riyadh-3003974                                                           | POS                                        | NEG          | POS          | POS          | NEG          | NEG         | NEG              | NEG                    | NEG                       | NEG                 | POS                | NEG                        |  |
| Riyadh_IC_067                                                            | POS                                        | NEG          | POS          | POS          | NEG          | NEG         | NEG              | NEG                    | NEG                       | NEG                 | POS                | NEG                        |  |
| Riyadh-2988627                                                           | POS                                        | NEG          | POS          | POS          | NEG          | NEG         | NEG              | NEG                    | NEG                       | NEG                 | POS                | NEG                        |  |
| Riyadh-3112581                                                           | POS                                        | NEG          | POS          | POS          | NEG          | NEG         | NEG              | NEG                    | NEG                       | NEG                 | POS                | NEG                        |  |
| <b>CC22-MRSA-IV [PVL+]</b>                                               |                                            |              |              |              |              |             |                  |                        |                           |                     |                    |                            |  |
| Riyadh-2781996-1                                                         | POS                                        | NEG          | POS          | POS          | NEG          | NEG         | NEG              | NEG                    | NEG                       | NEG                 | POS                | NEG                        |  |
| Riyadh-3103421                                                           | POS                                        | NEG          | POS          | POS          | NEG          | NEG         | NEG              | NEG                    | NEG                       | NEG                 | POS                | NEG                        |  |
| Riyadh-3026502                                                           | POS                                        | NEG          | POS          | POS          | NEG          | NEG         | NEG              | NEG                    | NEG                       | NEG                 | POS                | NEG                        |  |
| Riyadh-3081378-2                                                         | POS                                        | NEG          | POS          | POS          | NEG          | NEG         | NEG              | NEG                    | NEG                       | NEG                 | POS                | NEG                        |  |
| Riyadh_IC_185                                                            | POS                                        | NEG          | POS          | POS          | NEG          | NEG         | NEG              | NEG                    | NEG                       | NEG                 | POS                | NEG                        |  |
| Riyadh_IC_204-1                                                          | POS                                        | NEG          | POS          | POS          | NEG          | NEG         | NEG              | NEG                    | NEG                       | NEG                 | POS                | NEG                        |  |
| Riyadh-159371                                                            | POS                                        | POS          | POS          | POS          | NEG          | NEG         | NEG              | NEG                    | NEG                       | NEG                 | POS                | NEG                        |  |
| Riyadh-2753975                                                           | POS                                        | NEG          | POS          | POS          | NEG          | NEG         | NEG              | NEG                    | NEG                       | NEG                 | POS                | NEG                        |  |
| Riyadh-2775605                                                           | POS                                        | NEG          | POS          | POS          | NEG          | NEG         | NEG              | NEG                    | NEG                       | NEG                 | POS                | NEG                        |  |
| Riyadh-2781996-2                                                         | POS                                        | NEG          | POS          | POS          | NEG          | NEG         | NEG              | NEG                    | NEG                       | NEG                 | POS                | NEG                        |  |
| Riyadh-2823783-2                                                         | POS                                        | NEG          | POS          | POS          | NEG          | NEG         | NEG              | NEG                    | NEG                       | NEG                 | POS                | NEG                        |  |
| Riyadh-276501                                                            | POS                                        | NEG          | POS          | POS          | NEG          | NEG         | NEG              | NEG                    | NEG                       | NEG                 | POS                | NEG                        |  |
| Riyadh-3036074                                                           | POS                                        | NEG          | POS          | POS          | NEG          | NEG         | NEG              | NEG                    | NEG                       | NEG                 | POS                | NEG                        |  |
| Riyadh-3053099                                                           | POS                                        | NEG          | POS          | POS          | NEG          | NEG         | NEG              | NEG                    | NEG                       | NEG                 | POS                | NEG                        |  |
| Riyadh-3055366                                                           | POS                                        | NEG          | POS          | POS          | NEG          | NEG         | NEG              | NEG                    | NEG                       | NEG                 | POS                | NEG                        |  |
| Riyadh-3082712                                                           | POS                                        | NEG          | POS          | POS          | NEG          | NEG         | NEG              | NEG                    | NEG                       | NEG                 | POS                | NEG                        |  |
| Riyadh-3087502                                                           | POS                                        | NEG          | POS          | POS          | NEG          | NEG         | NEG              | NEG                    | NEG                       | NEG                 | POS                | NEG                        |  |
| Riyadh-6                                                                 | POS                                        | NEG          | POS          | POS          | NEG          | NEG         | NEG              | NEG                    | NEG                       | NEG                 | POS                | NEG                        |  |
| Riyadh-7                                                                 | POS                                        | NEG          | POS          | POS          | NEG          | NEG         | NEG              | NEG                    | NEG                       | NEG                 | POS                | NEG                        |  |
| Riyadh-8                                                                 | POS                                        | NEG          | POS          | POS          | NEG          | NEG         | NEG              | NEG                    | NEG                       | NEG                 | POS                | NEG                        |  |
| <b>CC30-MRSA-IV [PVL+], Southwest Pacific Clone</b>                      |                                            |              |              |              |              |             |                  |                        |                           |                     |                    |                            |  |
| Riyadh-10                                                                | NEG                                        | NEG          | POS          | POS          | NEG          | POS         | NEG              | NEG                    | NEG                       | NEG                 | POS                | NEG                        |  |
| Riyadh_IC_123                                                            | NEG                                        | NEG          | POS          | POS          | NEG          | POS         | NEG              | NEG                    | NEG                       | NEG                 | POS                | NEG                        |  |
| Riyadh-3080713                                                           | NEG                                        | NEG          | POS          | POS          | NEG          | POS         | NEG              | NEG                    | NEG                       | NEG                 | POS                | NEG                        |  |
| Riyadh-2803856                                                           | NEG                                        | NEG          | POS          | POS          | NEG          | POS         | NEG              | NEG                    | NEG                       | NEG                 | POS                | NEG                        |  |
| Riyadh-2817276-1                                                         | NEG                                        | NEG          | POS          | POS          | AMB          | POS         | NEG              | NEG                    | NEG                       | NEG                 | POS                | NEG                        |  |
| Riyadh-2817571-2                                                         | NEG                                        | NEG          | POS          | POS          | NEG          | POS         | NEG              | NEG                    | NEG                       | NEG                 | POS                | NEG                        |  |
| Riyadh-3033868                                                           | NEG                                        | NEG          | POS          | POS          | NEG          | POS         | NEG              | NEG                    | NEG                       | NEG                 | POS                | NEG                        |  |
| Riyadh-2550108                                                           | NEG                                        | NEG          | POS          | POS          | NEG          | POS         | NEG              | NEG                    | NEG                       | NEG                 | POS                | NEG                        |  |
| Riyadh-3095056-2                                                         | NEG                                        | NEG          | POS          | POS          | NEG          | POS         | NEG              | NEG                    | NEG                       | NEG                 | POS                | NEG                        |  |
| Riyadh-2819899                                                           | NEG                                        | NEG          | POS          | POS          | NEG          | POS         | NEG              | NEG                    | NEG                       | NEG                 | POS                | NEG                        |  |
| Riyadh-2821805                                                           | NEG                                        | NEG          | POS          | POS          | NEG          | POS         | NEG              | NEG                    | NEG                       | NEG                 | POS                | NEG                        |  |
| Riyadh-3013928                                                           | NEG                                        | NEG          | POS          | POS          | NEG          | POS         | NEG              | NEG                    | NEG                       | NEG                 | POS                | NEG                        |  |
| Riyadh-3029402                                                           | NEG                                        | NEG          | POS          | POS          | NEG          | POS         | NEG              | NEG                    | NEG                       | NEG                 | POS                | NEG                        |  |
| <b>CC45/agr IV-MRSA-IV, WA MRSA-23</b>                                   |                                            |              |              |              |              |             |                  |                        |                           |                     |                    |                            |  |
| Riyadh-3081378-1                                                         | NEG                                        | NEG          | POS          | NEG          | NEG          | NEG         | NEG              | NEG                    | NEG                       | NEG                 | NEG                | POS                        |  |
| <b>CC80-MRSA-IV</b>                                                      |                                            |              |              |              |              |             |                  |                        |                           |                     |                    |                            |  |
| Riyadh-3107635                                                           | POS                                        | NEG          | NEG          | POS          | NEG          | POS         | POS              | NEG                    | NEG                       | NEG                 | NEG                | POS                        |  |
| Riyadh-2987458                                                           | POS                                        | NEG          | NEG          | AMB          | NEG          | POS         | POS              | NEG                    | NEG                       | NEG                 | NEG                | POS                        |  |
| <b>CC80-MRSA-IV [PVL+], European caMRSA Clone</b>                        |                                            |              |              |              |              |             |                  |                        |                           |                     |                    |                            |  |
| Riyadh-2988048                                                           | POS                                        | NEG          | NEG          | AMB          | NEG          | POS         | POS              | NEG                    | NEG                       | NEG                 | NEG                | POS                        |  |
| Riyadh-2990585-2                                                         | POS                                        | NEG          | NEG          | AMB          | NEG          | POS         | POS              | NEG                    | NEG                       | NEG                 | NEG                | POS                        |  |
| Riyadh-2990585-1                                                         | POS                                        | NEG          | NEG          | AMB          | NEG          | POS         | POS              | NEG                    | NEG                       | NEG                 | NEG                | POS                        |  |
| Riyadh-2826033                                                           | POS                                        | NEG          | NEG          | POS          | NEG          | POS         | POS              | NEG                    | NEG                       | NEG                 | NEG                | POS                        |  |
| Riyadh-1601562                                                           | POS                                        | NEG          | NEG          | AMB          | NEG          | POS         | POS              | NEG                    | NEG                       | NEG                 | NEG                | POS                        |  |
| Riyadh-2569940                                                           | POS                                        | NEG          | NEG          | POS          | NEG          | POS         | POS              | NEG                    | NEG                       | NEG                 | NEG                | POS                        |  |
| Riyadh-2571692                                                           | POS                                        | NEG          | NEG          | POS          | NEG          | POS         | POS              | NEG                    | NEG                       | NEG                 | NEG                | POS                        |  |
| Riyadh-2763029                                                           | POS                                        | NEG          | NEG          | POS          | NEG          | POS         | POS              | NEG                    | NEG                       | NEG                 | NEG                | POS                        |  |
| Riyadh-2767096                                                           | POS                                        | NEG          | NEG          | AMB          | NEG          | POS         | POS              | NEG                    | NEG                       | NEG                 | NEG                | POS                        |  |
| Riyadh-2775130                                                           | POS                                        | NEG          | NEG          | AMB          | NEG          | POS         | POS              | NEG                    | NEG                       | NEG                 | NEG                | POS                        |  |
| Riyadh-2778256                                                           | POS                                        | NEG          | NEG          | AMB          | NEG          | POS         | POS              | NEG                    | NEG                       | NEG                 | NEG                | POS                        |  |
| Riyadh-2817505                                                           | POS                                        | NEG          | NEG          | POS          | NEG          | POS         | POS              | NEG                    | NEG                       | NEG                 | NEG                | POS                        |  |
| Riyadh-3024912                                                           | POS                                        | NEG          | NEG          | AMB          | NEG          | POS         | POS              | NEG                    | NEG                       | NEG                 | NEG                | POS                        |  |
| Riyadh-2786990                                                           | POS                                        | NEG          | NEG          | AMB          | NEG          | POS         | POS              | NEG                    | NEG                       | NEG                 | NEG                | POS                        |  |
| Riyadh-3292034                                                           | POS                                        | NEG          | NEG          | POS          | NEG          | POS         | POS              | NEG                    | NEG                       | NEG                 | NEG                | POS                        |  |
| Riyadh-3                                                                 | POS                                        | NEG          | NEG          | POS          | NEG          | POS         | POS              | NEG                    | NEG                       | NEG                 | NEG                | POS                        |  |
| Riyadh-5                                                                 | POS                                        | NEG          | NEG          | POS          | NEG          | POS         | POS              | NEG                    | NEG                       | NEG                 | NEG                | POS                        |  |
| Riyadh-2553167                                                           | POS                                        | NEG          | NEG          | POS          | NEG          | POS         | POS              | NEG                    | NEG                       | NEG                 | NEG                | POS                        |  |
| Riyadh-3002592                                                           | POS                                        | NEG          | NEG          | POS          | NEG          | POS         | POS              | NEG                    | NEG                       | NEG                 | NEG                | POS                        |  |
| <b>CC88-MRSA-IV [PVL+]</b>                                               |                                            |              |              |              |              |             |                  |                        |                           |                     |                    |                            |  |
| Riyadh-2736996                                                           | POS                                        | NEG          | POS          | POS          | NEG          | POS         | AMB              | NEG                    | NEG                       | NEG                 | POS                | NEG                        |  |
| Riyadh-2942396                                                           | POS                                        | NEG          | POS          | POS          | NEG          | POS         | AMB              | NEG                    | NEG                       | NEG                 | NEG                | POS                        |  |
| Riyadh-3105391                                                           | POS                                        | NEG          | AMB          | AMB          | NEG          | POS         | NEG              | NEG                    | NEG                       | NEG                 | NEG                | POS                        |  |
| <b>CC97-MRSA-V</b>                                                       |                                            |              |              |              |              |             |                  |                        |                           |                     |                    |                            |  |
| Riyadh-0297622                                                           | POS                                        | NEG          | NEG          | NEG          | NEG          | NEG         | POS              | NEG                    | NEG                       | NEG                 | NEG                | POS                        |  |
| Riyadh-3025471                                                           | POS                                        | NEG          | AMB          | NEG          | NEG          |             |                  |                        |                           |                     |                    |                            |  |

|                                                          | VIRULENCE - STAPHYLOCOCCAL SUPERANTIGEN/ENTEROTOXIN-LIKE GENES (SET/SSL) |                      |                                            |                     |                               |                                            |                               |                                            |                               |                           |                                            |             |                       |
|----------------------------------------------------------|--------------------------------------------------------------------------|----------------------|--------------------------------------------|---------------------|-------------------------------|--------------------------------------------|-------------------------------|--------------------------------------------|-------------------------------|---------------------------|--------------------------------------------|-------------|-----------------------|
|                                                          | ssl02/set7                                                               | ssl02/set7 (MRSA252) | ssl03/set8_p robe 1                        | ssl03/set8_p robe 2 | ssl03/set8 (MRSA252, SAR0424) | ssl04/set9                                 | ssl04/set9 (MRSA252, SAR0425) | ssl05/set3_p robe 1                        | ssl05/set3 (RF122, probe-611) | ssl05/set3_p robe 2 (612) | ssl05/set3 (MRSA252)                       | ssl06/set21 | ssl06 (NCTC8325+ MW2) |
|                                                          | staphylococcal superantigen-like protein 2                               |                      | staphylococcal superantigen-like protein 3 |                     |                               | staphylococcal superantigen-like protein 4 |                               | staphylococcal superantigen-like protein 5 |                               |                           | staphylococcal superantigen-like protein 6 |             |                       |
| <b>CC1-MRSA-IV&amp;SCCFus, WA MRSA-1/45</b>              | POS                                                                      | AMB                  | POS                                        | POS                 | NEG                           | POS                                        | NEG                           | POS                                        | AMB                           | POS                       | NEG                                        | POS         | POS                   |
| Riyadh-3108609                                           | POS                                                                      | AMB                  | POS                                        | POS                 | NEG                           | POS                                        | NEG                           | POS                                        | AMB                           | POS                       | NEG                                        | POS         | POS                   |
| <b>CC1/ST772-MRSA-V [PVL+], "Bengal Bay Clone/WA I"</b>  | POS                                                                      | AMB                  | POS                                        | POS                 | NEG                           | POS                                        | AMB                           | POS                                        | AMB                           | POS                       | AMB                                        | NEG         | NEG                   |
| Riyadh-2819026                                           | POS                                                                      | AMB                  | POS                                        | POS                 | NEG                           | POS                                        | AMB                           | POS                                        | AMB                           | POS                       | AMB                                        | NEG         | NEG                   |
| <b>CC5-MRSA-IV, Paediatric clone</b>                     | POS                                                                      | AMB                  | POS                                        | POS                 | NEG                           | POS                                        | NEG                           | POS                                        | AMB                           | POS                       | NEG                                        | NEG         | NEG                   |
| Riyadh-2915327-1                                         | POS                                                                      | AMB                  | POS                                        | POS                 | NEG                           | POS                                        | NEG                           | POS                                        | AMB                           | POS                       | NEG                                        | NEG         | NEG                   |
| Riyadh-2915327-2                                         | POS                                                                      | AMB                  | POS                                        | POS                 | NEG                           | POS                                        | NEG                           | POS                                        | AMB                           | POS                       | NEG                                        | NEG         | NEG                   |
| Riyadh-2                                                 | POS                                                                      | AMB                  | POS                                        | POS                 | NEG                           | POS                                        | NEG                           | POS                                        | AMB                           | POS                       | NEG                                        | NEG         | NEG                   |
| <b>CC5-MRSA-IV [PVL+], Paediatric clone</b>              | POS                                                                      | AMB                  | POS                                        | POS                 | NEG                           | POS                                        | AMB                           | POS                                        | AMB                           | POS                       | NEG                                        | NEG         | NEG                   |
| Riyadh-2986566                                           | POS                                                                      | AMB                  | POS                                        | POS                 | NEG                           | POS                                        | AMB                           | POS                                        | AMB                           | POS                       | NEG                                        | NEG         | NEG                   |
| Riyadh-2931325                                           | POS                                                                      | AMB                  | POS                                        | POS                 | NEG                           | POS                                        | NEG                           | POS                                        | AMB                           | POS                       | NEG                                        | NEG         | NEG                   |
| <b>CC5-MRSA-IVvar, "Maltese Clone"</b>                   | POS                                                                      | AMB                  | POS                                        | POS                 | NEG                           | POS                                        | NEG                           | POS                                        | AMB                           | POS                       | NEG                                        | NEG         | NEG                   |
| Riyadh-2983654                                           | POS                                                                      | AMB                  | POS                                        | POS                 | NEG                           | POS                                        | NEG                           | POS                                        | AMB                           | POS                       | NEG                                        | NEG         | NEG                   |
| Riyadh-4                                                 | POS                                                                      | AMB                  | POS                                        | POS                 | NEG                           | POS                                        | NEG                           | POS                                        | AMB                           | POS                       | NEG                                        | NEG         | NEG                   |
| Riyadh-2790233                                           | POS                                                                      | AMB                  | POS                                        | POS                 | NEG                           | POS                                        | NEG                           | POS                                        | AMB                           | POS                       | NEG                                        | NEG         | NEG                   |
| <b>CC5-MRSA-V</b>                                        | POS                                                                      | AMB                  | POS                                        | POS                 | NEG                           | POS                                        | NEG                           | POS                                        | AMB                           | POS                       | NEG                                        | NEG         | NEG                   |
| Riyadh-2568944                                           | POS                                                                      | AMB                  | POS                                        | POS                 | NEG                           | POS                                        | NEG                           | POS                                        | AMB                           | POS                       | NEG                                        | NEG         | NEG                   |
| <b>CC6-MRSA-IV, WA MRSA-51/66</b>                        | POS                                                                      | AMB                  | POS                                        | POS                 | NEG                           | POS                                        | NEG                           | POS                                        | AMB                           | POS                       | NEG                                        | NEG         | NEG                   |
| Riyadh-2556168                                           | POS                                                                      | AMB                  | POS                                        | POS                 | NEG                           | POS                                        | NEG                           | POS                                        | AMB                           | POS                       | NEG                                        | NEG         | NEG                   |
| Riyadh-2824507                                           | POS                                                                      | AMB                  | POS                                        | POS                 | NEG                           | POS                                        | NEG                           | POS                                        | AMB                           | POS                       | NEG                                        | NEG         | NEG                   |
| Riyadh-2990831                                           | POS                                                                      | AMB                  | POS                                        | POS                 | NEG                           | POS                                        | NEG                           | POS                                        | AMB                           | POS                       | AMB                                        | NEG         | NEG                   |
| <b>CC9/ST239-MRSA-III, Vienna/Hungarian/Brazilian Cl</b> | POS                                                                      | AMB                  | POS                                        | POS                 | NEG                           | POS                                        | NEG                           | POS                                        | AMB                           | POS                       | NEG                                        | NEG         | NEG                   |
| Riyadh-9                                                 | POS                                                                      | AMB                  | POS                                        | POS                 | NEG                           | POS                                        | NEG                           | POS                                        | AMB                           | POS                       | NEG                                        | NEG         | NEG                   |
| Riyadh-3028763                                           | POS                                                                      | AMB                  | POS                                        | POS                 | NEG                           | POS                                        | NEG                           | POS                                        | AMB                           | POS                       | NEG                                        | NEG         | NEG                   |
| Riyadh-2817437                                           | POS                                                                      | AMB                  | POS                                        | POS                 | NEG                           | POS                                        | NEG                           | POS                                        | AMB                           | POS                       | NEG                                        | NEG         | NEG                   |
| Riyadh-2793706                                           | POS                                                                      | AMB                  | POS                                        | POS                 | NEG                           | POS                                        | NEG                           | POS                                        | AMB                           | POS                       | NEG                                        | NEG         | NEG                   |
| Riyadh-2818797                                           | POS                                                                      | AMB                  | POS                                        | POS                 | NEG                           | POS                                        | NEG                           | POS                                        | AMB                           | POS                       | NEG                                        | NEG         | NEG                   |
| Riyadh-2822825                                           | POS                                                                      | AMB                  | POS                                        | POS                 | NEG                           | POS                                        | NEG                           | POS                                        | AMB                           | POS                       | NEG                                        | NEG         | NEG                   |
| Riyadh-2888905                                           | POS                                                                      | AMB                  | POS                                        | POS                 | NEG                           | POS                                        | NEG                           | POS                                        | AMB                           | POS                       | NEG                                        | NEG         | NEG                   |
| Riyadh-2888915                                           | POS                                                                      | AMB                  | POS                                        | POS                 | NEG                           | POS                                        | NEG                           | POS                                        | AMB                           | POS                       | NEG                                        | NEG         | NEG                   |
| Riyadh-2567782                                           | POS                                                                      | AMB                  | POS                                        | POS                 | NEG                           | POS                                        | NEG                           | POS                                        | AMB                           | POS                       | NEG                                        | NEG         | NEG                   |
| Riyadh-2891670                                           | POS                                                                      | AMB                  | POS                                        | POS                 | NEG                           | POS                                        | NEG                           | POS                                        | AMB                           | POS                       | NEG                                        | NEG         | NEG                   |
| Riyadh-3006920                                           | POS                                                                      | AMB                  | POS                                        | POS                 | NEG                           | POS                                        | NEG                           | POS                                        | AMB                           | POS                       | NEG                                        | NEG         | NEG                   |
| Riyadh-2817276-1                                         | POS                                                                      | AMB                  | POS                                        | POS                 | NEG                           | POS                                        | NEG                           | POS                                        | AMB                           | POS                       | NEG                                        | NEG         | NEG                   |
| Riyadh-0295102                                           | POS                                                                      | AMB                  | POS                                        | POS                 | NEG                           | POS                                        | NEG                           | POS                                        | AMB                           | POS                       | NEG                                        | NEG         | NEG                   |
| Riyadh-2820597                                           | POS                                                                      | AMB                  | POS                                        | POS                 | NEG                           | POS                                        | NEG                           | POS                                        | AMB                           | POS                       | NEG                                        | NEG         | NEG                   |
| Riyadh-2822088                                           | POS                                                                      | AMB                  | POS                                        | POS                 | NEG                           | POS                                        | NEG                           | POS                                        | AMB                           | POS                       | NEG                                        | NEG         | NEG                   |
| Riyadh-3010092                                           | POS                                                                      | AMB                  | POS                                        | POS                 | NEG                           | POS                                        | NEG                           | POS                                        | AMB                           | POS                       | NEG                                        | NEG         | NEG                   |
| Riyadh-3022844                                           | POS                                                                      | AMB                  | POS                                        | POS                 | NEG                           | POS                                        | NEG                           | POS                                        | AMB                           | POS                       | NEG                                        | NEG         | NEG                   |
| Riyadh-3108214-2                                         | POS                                                                      | AMB                  | POS                                        | POS                 | NEG                           | POS                                        | NEG                           | POS                                        | AMB                           | POS                       | NEG                                        | NEG         | NEG                   |
| Riyadh-2823926                                           | POS                                                                      | AMB                  | POS                                        | POS                 | NEG                           | POS                                        | NEG                           | POS                                        | AMB                           | POS                       | NEG                                        | NEG         | NEG                   |
| Riyadh-1                                                 | POS                                                                      | AMB                  | POS                                        | POS                 | NEG                           | POS                                        | NEG                           | POS                                        | AMB                           | POS                       | NEG                                        | NEG         | NEG                   |
| Riyadh-2818388                                           | POS                                                                      | AMB                  | POS                                        | POS                 | NEG                           | POS                                        | NEG                           | POS                                        | AMB                           | POS                       | NEG                                        | NEG         | NEG                   |
| Riyadh-3112581                                           | POS                                                                      | AMB                  | POS                                        | POS                 | NEG                           | POS                                        | NEG                           | POS                                        | AMB                           | POS                       | NEG                                        | NEG         | NEG                   |
| <b>CC9/ST834-MRSA-(atypical SCCmec)</b>                  | POS                                                                      | AMB                  | POS                                        | POS                 | NEG                           | POS                                        | NEG                           | POS                                        | AMB                           | POS                       | NEG                                        | NEG         | NEG                   |
| Riyadh-3103521                                           | POS                                                                      | AMB                  | POS                                        | POS                 | NEG                           | POS                                        | NEG                           | POS                                        | AMB                           | POS                       | NEG                                        | NEG         | NEG                   |
| <b>CC22-MRSA-IV, Barnim/UK-EMRSA-15</b>                  | POS                                                                      | AMB                  | POS                                        | POS                 | NEG                           | POS                                        | NEG                           | POS                                        | AMB                           | POS                       | NEG                                        | NEG         | NEG                   |
| Riyadh-2553350                                           | POS                                                                      | AMB                  | POS                                        | POS                 | NEG                           | POS                                        | NEG                           | POS                                        | AMB                           | POS                       | NEG                                        | NEG         | NEG                   |
| Riyadh-2571758                                           | POS                                                                      | AMB                  | POS                                        | POS                 | NEG                           | POS                                        | NEG                           | POS                                        | AMB                           | POS                       | NEG                                        | NEG         | NEG                   |
| Riyadh-3029203                                           | POS                                                                      | AMB                  | POS                                        | POS                 | NEG                           | POS                                        | NEG                           | POS                                        | AMB                           | POS                       | NEG                                        | NEG         | NEG                   |
| Riyadh-3039785                                           | POS                                                                      | AMB                  | POS                                        | POS                 | NEG                           | POS                                        | NEG                           | POS                                        | AMB                           | POS                       | NEG                                        | NEG         | NEG                   |
| Riyadh-3105594                                           | POS                                                                      | AMB                  | POS                                        | POS                 | NEG                           | POS                                        | NEG                           | POS                                        | AMB                           | POS                       | NEG                                        | NEG         | NEG                   |
| Riyadh_IC_204-2                                          | POS                                                                      | AMB                  | POS                                        | POS                 | NEG                           | POS                                        | NEG                           | POS                                        | AMB                           | POS                       | NEG                                        | NEG         | NEG                   |
| Riyadh-3003974                                           | POS                                                                      | AMB                  | POS                                        | POS                 | NEG                           | POS                                        | NEG                           | POS                                        | AMB                           | POS                       | NEG                                        | NEG         | NEG                   |
| Riyadh_IC_067                                            | POS                                                                      | AMB                  | POS                                        | POS                 | NEG                           | POS                                        | NEG                           | POS                                        | AMB                           | POS                       | NEG                                        | NEG         | NEG                   |
| Riyadh-2988627                                           | POS                                                                      | AMB                  | POS                                        | POS                 | NEG                           | POS                                        | NEG                           | POS                                        | AMB                           | POS                       | NEG                                        | NEG         | NEG                   |
| Riyadh-3112581                                           | POS                                                                      | AMB                  | POS                                        | POS                 | NEG                           | POS                                        | NEG                           | POS                                        | AMB                           | POS                       | NEG                                        | NEG         | NEG                   |
| <b>CC22-MRSA-IV [PVL+]</b>                               | POS                                                                      | AMB                  | POS                                        | POS                 | NEG                           | POS                                        | NEG                           | POS                                        | AMB                           | POS                       | NEG                                        | NEG         | NEG                   |
| Riyadh-2781996-1                                         | POS                                                                      | AMB                  | POS                                        | POS                 | NEG                           | POS                                        | NEG                           | POS                                        | AMB                           | POS                       | NEG                                        | NEG         | NEG                   |
| Riyadh-3103432                                           | POS                                                                      | AMB                  | POS                                        | POS                 | NEG                           | POS                                        | NEG                           | POS                                        | AMB                           | POS                       | NEG                                        | NEG         | NEG                   |
| Riyadh-3028502                                           | POS                                                                      | AMB                  | POS                                        | POS                 | NEG                           | POS                                        | NEG                           | POS                                        | AMB                           | POS                       | NEG                                        | NEG         | NEG                   |
| Riyadh-3081378-2                                         | POS                                                                      | AMB                  | POS                                        | POS                 | NEG                           | POS                                        | NEG                           | POS                                        | AMB                           | POS                       | NEG                                        | NEG         | NEG                   |
| Riyadh_IC_185                                            | POS                                                                      | AMB                  | POS                                        | POS                 | NEG                           | POS                                        | NEG                           | POS                                        | AMB                           | POS                       | NEG                                        | NEG         | NEG                   |
| Riyadh_IC_204-1                                          | POS                                                                      | AMB                  | POS                                        | POS                 | NEG                           | POS                                        | NEG                           | POS                                        | AMB                           | POS                       | NEG                                        | NEG         | NEG                   |
| Riyadh-1559371                                           | POS                                                                      | AMB                  | POS                                        | POS                 | NEG                           | POS                                        | NEG                           | POS                                        | AMB                           | POS                       | NEG                                        | NEG         | NEG                   |
| Riyadh-2753975                                           | POS                                                                      | AMB                  | POS                                        | POS                 | NEG                           | POS                                        | NEG                           | POS                                        | AMB                           | POS                       | NEG                                        | NEG         | NEG                   |
| Riyadh-2775605                                           | POS                                                                      | AMB                  | POS                                        | POS                 | NEG                           | POS                                        | NEG                           | POS                                        | AMB                           | POS                       | NEG                                        | NEG         | NEG                   |
| Riyadh-2781996-2                                         | POS                                                                      | AMB                  | POS                                        | POS                 | NEG                           | POS                                        | NEG                           | POS                                        | AMB                           | POS                       | NEG                                        | NEG         | NEG                   |
| Riyadh-2823783-2                                         | POS                                                                      | AMB                  | POS                                        | POS                 | NEG                           | POS                                        | NEG                           | POS                                        | AMB                           | POS                       | NEG                                        | NEG         | NEG                   |
| Riyadh-276501                                            | POS                                                                      | AMB                  | POS                                        | POS                 | NEG                           | POS                                        | NEG                           | POS                                        | AMB                           | POS                       | NEG                                        | NEG         | NEG                   |
| Riyadh-3036074                                           | POS                                                                      | AMB                  | POS                                        | POS                 | NEG                           | POS                                        | NEG                           | POS                                        | AMB                           | POS                       | NEG                                        | NEG         | NEG                   |
| Riyadh-3053099                                           | POS                                                                      | AMB                  | POS                                        | POS                 | NEG                           | POS                                        | NEG                           | POS                                        | AMB                           | POS                       | NEG                                        | NEG         | NEG                   |
| Riyadh-3055366                                           | POS                                                                      | AMB                  | POS                                        | POS                 | NEG                           | POS                                        | NEG                           | POS                                        | AMB                           | POS                       | NEG                                        | NEG         | NEG                   |
| Riyadh-3082712                                           | POS                                                                      | AMB                  | POS                                        | POS                 | NEG                           | POS                                        | NEG                           | POS                                        | AMB                           | POS                       | NEG                                        | NEG         | NEG                   |
| Riyadh-3087502                                           | POS                                                                      | AMB                  | POS                                        | POS                 | NEG                           | POS                                        | NEG                           | POS                                        | AMB                           | POS                       | NEG                                        | NEG         | NEG                   |
| Riyadh-6                                                 | POS                                                                      | AMB                  | POS                                        | POS                 | NEG                           | POS                                        | NEG                           | POS                                        | AMB                           | POS                       | NEG                                        | NEG         | NEG                   |
| Riyadh-7                                                 | POS                                                                      | AMB                  | POS                                        | POS                 | NEG                           | POS                                        | NEG                           | POS                                        | AMB                           | POS                       | NEG                                        | NEG         | NEG                   |
| Riyadh-8                                                 | POS                                                                      | AMB                  | POS                                        | POS                 | NEG                           | POS                                        | NEG                           | POS                                        | AMB                           | POS                       | NEG                                        | NEG         | NEG                   |
| <b>CC30-MRSA-IV [PVL+], Southwest Pacific Clone</b>      | POS                                                                      | AMB                  | POS                                        | POS                 | NEG                           | POS                                        | NEG                           | POS                                        | AMB                           | POS                       | NEG                                        | NEG         | NEG                   |
| Riyadh-10                                                | POS                                                                      | AMB                  | POS                                        | POS                 | NEG                           | POS                                        | NEG                           | POS                                        | AMB                           | POS                       | NEG                                        | NEG         | NEG                   |
| Riyadh_IC_123                                            | POS                                                                      | AMB                  | POS                                        | POS                 | NEG                           | POS                                        | NEG                           | POS                                        | AMB                           | POS                       | NEG                                        | NEG         | NEG                   |
| Riyadh-3080713                                           | POS                                                                      | AMB                  | POS                                        | POS                 | NEG                           | POS                                        | NEG                           | POS                                        | AMB                           | POS                       | NEG                                        | NEG         | NEG                   |
| Riyadh-2803856                                           | POS                                                                      | AMB                  | POS                                        | POS                 | NEG                           | POS                                        | NEG                           | POS                                        | AMB                           | POS                       | NEG                                        | NEG         | NEG                   |
| Riyadh-2817276-1                                         | POS                                                                      | AMB                  | POS                                        | POS                 | NEG                           | POS                                        | NEG                           | POS                                        | AMB                           | POS                       | NEG                                        | NEG         | NEG                   |
| Riyadh-2817571-2                                         | POS                                                                      | AMB                  | POS                                        | POS                 | NEG                           | POS                                        | NEG                           | POS                                        | AMB                           | POS                       | NEG                                        | NEG         | NEG                   |
| Riyadh-3033868                                           | POS                                                                      | AMB                  | POS                                        | POS                 | NEG                           | POS                                        | NEG                           | POS                                        | AMB                           | POS                       | NEG                                        | NEG         | NEG                   |
| Riyadh-2550108                                           | POS                                                                      | AMB                  | POS                                        | POS                 | NEG                           | POS                                        | NEG                           | POS                                        | AMB                           | POS                       | NEG                                        | NEG         | NEG                   |
| Riyadh-3095056-2                                         | POS                                                                      | AMB                  | POS                                        | POS                 | NEG                           | POS                                        | NEG                           | POS                                        | AMB                           | POS                       | NEG                                        | NEG         | NEG                   |
| Riyadh-2819899                                           | POS                                                                      | AMB                  | POS                                        | POS                 | NEG                           | POS                                        | NEG                           | POS                                        | AMB                           | POS                       | NEG                                        | NEG         | NEG                   |
| Riyadh-2821805                                           | POS                                                                      | AMB                  | POS                                        | POS                 | NEG                           | POS                                        | NEG                           | POS                                        | AMB                           | POS                       | NEG                                        | NEG         | NEG                   |
| Riyadh-3013928                                           | POS                                                                      | AMB                  | POS                                        | POS                 | NEG                           | POS                                        | NEG                           | POS                                        | AMB                           | POS                       | NEG                                        | NEG         | NEG                   |
| Riyadh-3029402                                           | POS                                                                      | AMB                  | POS                                        | POS                 | NEG                           | POS                                        | NEG                           | POS                                        | AMB                           | POS                       | NEG                                        | NEG         | NEG                   |
| <b>CC45/agr IV-MRSA-IV, WA MRSA-23</b>                   | POS                                                                      | AMB                  | POS                                        | POS                 | NEG                           | POS                                        | NEG                           | POS                                        | AMB                           | POS                       | NEG                                        | NEG         | NEG                   |
| Riyadh-3081378-1                                         | POS                                                                      | AMB                  | POS                                        | POS                 | NEG                           | POS                                        | NEG                           | POS                                        | AMB                           | POS                       | NEG                                        | NEG         | NEG                   |
| <b>CC80-MRSA-IV</b>                                      | POS                                                                      | AMB                  | POS                                        | POS                 | NEG                           | POS                                        | NEG                           | POS                                        | AMB                           | POS                       | NEG                                        | NEG         | NEG                   |
| Riyadh-3107635                                           | POS                                                                      | AMB                  | POS                                        | POS                 | NEG                           | POS                                        | NEG                           | POS                                        | AMB                           | POS                       | NEG                                        | NEG         | NEG                   |
| Riyadh-2987458                                           | POS                                                                      | AMB                  | POS                                        | POS                 | NEG                           | POS                                        | NEG                           | POS                                        | AMB                           | POS                       | NEG                                        | NEG         | NEG                   |
| <b>CC80-MRSA-IV [PVL+], European caMRSA Clone</b>        | POS                                                                      | AMB                  | POS                                        | POS                 | NEG                           | POS                                        | NEG                           | POS                                        | AMB                           | POS                       | NEG                                        | NEG         | NEG                   |
| Riyadh-2988048                                           | POS                                                                      | AMB                  | POS                                        | POS                 | NEG                           | POS                                        | NEG                           | POS                                        | AMB                           | POS                       | NEG                                        | NEG         | NEG                   |
| Riyadh-2990585-2                                         | POS                                                                      | AMB                  | POS                                        | POS                 | NEG                           | POS                                        | NEG                           | POS                                        | AMB                           | POS                       | NEG                                        | NEG         | NEG                   |
| Riyadh-2990585-1                                         | POS                                                                      | AMB                  | POS                                        | POS                 | NEG                           | POS                                        | NEG                           | POS                                        | AMB                           | POS                       | NEG                                        | NEG         | NEG                   |
| Riyadh-2826033                                           | POS                                                                      | AMB                  | POS                                        | POS                 | NEG                           | POS                                        | NEG                           | POS                                        | AMB                           | POS                       | NEG                                        | NEG         | NEG                   |
| Riyadh-1601562                                           | POS                                                                      | AMB                  | POS                                        | POS                 | NEG                           | POS                                        | NEG                           | POS                                        | AMB                           | POS                       | NEG                                        | NEG         | NEG                   |
| Riyadh-2569940                                           | POS                                                                      | AMB                  | POS                                        | POS                 | NEG                           | POS                                        | NEG                           | POS                                        | AMB                           | POS                       | NEG                                        | NEG         | NEG                   |
| Riyadh-2571692                                           | POS                                                                      | AMB                  | POS                                        | POS                 | NEG                           | POS                                        | NEG                           | POS                                        | AMB                           | POS                       | NEG                                        | NEG         | NEG                   |
| Riyadh-2763029                                           | POS                                                                      | AMB                  | POS                                        | POS                 | NEG                           | POS                                        | NEG                           | POS                                        | AMB                           | POS                       | NEG                                        | NEG         | NEG                   |
| Riyadh-2767090                                           | POS                                                                      | AMB                  | POS                                        | POS                 | NEG                           | POS                                        | NEG                           | POS                                        | AMB                           | POS                       | NEG                                        | NEG         | NEG                   |
| Riyadh-2775130                                           | POS                                                                      | AMB                  | POS                                        | POS                 | NEG                           | POS                                        | NEG                           | POS                                        | AMB                           | POS                       | NEG                                        | NEG         | NEG                   |
| Riyadh-2778256                                           | POS                                                                      | AMB                  | POS                                        | POS                 | NEG                           | POS                                        | NEG                           | POS                                        | AMB                           | POS                       | NEG                                        | NEG         | NEG                   |
| Riyadh-2817505                                           | POS                                                                      | AMB                  | POS                                        | POS                 | NEG                           | POS                                        | NEG                           | POS                                        | AMB                           | POS                       | NEG                                        | NEG         | NEG                   |
| Riyadh-3024912                                           | POS                                                                      | AMB                  | POS                                        | POS                 | NEG                           | POS                                        | NEG                           | POS                                        | AMB                           | POS                       | NEG                                        | NEG         | NEG                   |
| Riyadh-2788690                                           | POS                                                                      | AMB                  | POS                                        | POS                 | NEG                           | POS                                        | NEG                           | POS                                        | AMB                           | POS                       | NEG                                        | NEG         | NEG                   |
| Riyadh-2829034                                           | POS                                                                      | AMB                  | POS                                        | POS                 | NEG                           | POS                                        | NEG                           | POS                                        | AMB                           | POS                       | NEG                                        | NEG         | NEG                   |
| Riyadh-3                                                 | POS                                                                      | AMB                  | POS                                        | POS                 | NEG                           | POS                                        | NEG                           | POS                                        | AMB                           | POS                       | NEG                                        | NEG         | NEG                   |
| Riyadh-5                                                 | POS                                                                      | AMB                  | POS                                        | POS                 | NEG                           | POS                                        | NEG                           | POS                                        | AMB                           | POS                       | NEG                                        | NEG         | NEG                   |
| Riyadh-2553167                                           | POS                                                                      | AMB                  | POS                                        | POS                 | NEG                           | POS                                        | NEG                           | POS                                        | AMB                           | POS                       | NEG                                        | NEG         | NEG                   |
| Riyadh-3002592                                           |                                                                          |                      |                                            |                     |                               |                                            |                               |                                            |                               |                           |                                            |             |                       |

|                                                          | VIRULENCE : STAPHYLOCOCCAL SUPERANTIGEN/ENTEROTOXIN-LIKE GENES (SET/SSL) |                      |                       |                                            |                      |                                            |                     |                      |
|----------------------------------------------------------|--------------------------------------------------------------------------|----------------------|-----------------------|--------------------------------------------|----------------------|--------------------------------------------|---------------------|----------------------|
|                                                          | ssl07/set1                                                               | ssl07/set1 (MRSA252) | ssl07/set1 (AF188836) | ssl08/set12_ probe 1                       | ssl08/set12_ probe 2 | ssl09/set5_p robe 1                        | ssl09/set5_p robe 2 | ssl09/set5 (MRSA252) |
|                                                          | staphylococcal superantigen-like protein 7                               |                      |                       | staphylococcal superantigen-like protein 8 |                      | staphylococcal superantigen-like protein 9 |                     |                      |
| <b>CC1-MRSA-IV&amp;SCCfus, WA MRSA-1/45</b>              |                                                                          |                      |                       |                                            |                      |                                            |                     |                      |
| Riyadh-3108609                                           | POS                                                                      | AMB                  | NEG                   | POS                                        | POS                  | POS                                        | POS                 | NEG                  |
| Riyadh-2913235                                           | POS                                                                      | AMB                  | AMB                   | POS                                        | POS                  | POS                                        | POS                 | NEG                  |
| <b>CC1/ST772-MRSA-V [PVL+], "Bengal Bay Clone/WA I"</b>  |                                                                          |                      |                       |                                            |                      |                                            |                     |                      |
| Riyadh-2819026                                           | POS                                                                      | AMB                  | AMB                   | POS                                        | POS                  | POS                                        | POS                 | NEG                  |
| <b>CC5-MRSA-IV, Paediatric clone</b>                     |                                                                          |                      |                       |                                            |                      |                                            |                     |                      |
| Riyadh-2915327-1                                         | POS                                                                      | AMB                  | AMB                   | POS                                        | POS                  | POS                                        | POS                 | NEG                  |
| Riyadh-2915327-2                                         | POS                                                                      | AMB                  | NEG                   | POS                                        | POS                  | POS                                        | POS                 | NEG                  |
| Riyadh-2                                                 | POS                                                                      | AMB                  | AMB                   | POS                                        | POS                  | POS                                        | POS                 | NEG                  |
| <b>CC5-MRSA-IV [PVL+], Paediatric clone</b>              |                                                                          |                      |                       |                                            |                      |                                            |                     |                      |
| Riyadh-2986666                                           | AMB                                                                      | POS                  | AMB                   | POS                                        | POS                  | POS                                        | POS                 | NEG                  |
| Riyadh-2913235                                           | POS                                                                      | AMB                  | AMB                   | POS                                        | POS                  | POS                                        | POS                 | NEG                  |
| <b>CC5-MRSA-IVvar, "Maltese Clone"</b>                   |                                                                          |                      |                       |                                            |                      |                                            |                     |                      |
| Riyadh-2983654                                           | AMB                                                                      | POS                  | AMB                   | POS                                        | POS                  | POS                                        | POS                 | NEG                  |
| Riyadh-4                                                 | POS                                                                      | AMB                  | AMB                   | POS                                        | POS                  | POS                                        | POS                 | NEG                  |
| Riyadh-2790233                                           | AMB                                                                      | POS                  | NEG                   | POS                                        | POS                  | POS                                        | POS                 | NEG                  |
| <b>CC5-MRSA-V</b>                                        |                                                                          |                      |                       |                                            |                      |                                            |                     |                      |
| Riyadh-2568944                                           | POS                                                                      | AMB                  | AMB                   | POS                                        | POS                  | POS                                        | POS                 | NEG                  |
| <b>CC6-MRSA-IV, WA MRSA-51/66</b>                        |                                                                          |                      |                       |                                            |                      |                                            |                     |                      |
| Riyadh-2556168                                           | POS                                                                      | NEG                  | NEG                   | POS                                        | POS                  | POS                                        | POS                 | NEG                  |
| Riyadh-2824507                                           | POS                                                                      | NEG                  | NEG                   | POS                                        | POS                  | POS                                        | POS                 | NEG                  |
| Riyadh-2990831                                           | POS                                                                      | NEG                  | AMB                   | POS                                        | POS                  | POS                                        | POS                 | NEG                  |
| <b>CC9/ST239-MRSA-III, Vienna/Hungarian/Brazilian Cl</b> |                                                                          |                      |                       |                                            |                      |                                            |                     |                      |
| Riyadh-9                                                 | POS                                                                      | AMB                  | AMB                   | POS                                        | POS                  | POS                                        | POS                 | NEG                  |
| Riyadh-3028763                                           | POS                                                                      | AMB                  | AMB                   | POS                                        | POS                  | POS                                        | POS                 | NEG                  |
| Riyadh-2817437                                           | AMB                                                                      | POS                  | AMB                   | POS                                        | POS                  | POS                                        | POS                 | NEG                  |
| Riyadh-2793706                                           | AMB                                                                      | POS                  | AMB                   | POS                                        | POS                  | POS                                        | POS                 | NEG                  |
| Riyadh-2818797                                           | AMB                                                                      | POS                  | AMB                   | POS                                        | POS                  | POS                                        | POS                 | NEG                  |
| Riyadh-2822825                                           | AMB                                                                      | POS                  | AMB                   | POS                                        | POS                  | POS                                        | POS                 | NEG                  |
| Riyadh-2888905                                           | AMB                                                                      | POS                  | AMB                   | POS                                        | POS                  | POS                                        | POS                 | NEG                  |
| Riyadh-2888915                                           | AMB                                                                      | POS                  | AMB                   | POS                                        | POS                  | POS                                        | POS                 | NEG                  |
| Riyadh-2567782                                           | POS                                                                      | AMB                  | AMB                   | POS                                        | POS                  | POS                                        | POS                 | NEG                  |
| Riyadh-2891670                                           | AMB                                                                      | POS                  | AMB                   | POS                                        | POS                  | POS                                        | POS                 | NEG                  |
| Riyadh-3006920                                           | AMB                                                                      | POS                  | AMB                   | POS                                        | POS                  | POS                                        | POS                 | NEG                  |
| Riyadh-281276-1                                          | AMB                                                                      | POS                  | AMB                   | POS                                        | POS                  | POS                                        | POS                 | NEG                  |
| Riyadh-0295102                                           | AMB                                                                      | POS                  | AMB                   | POS                                        | POS                  | POS                                        | POS                 | NEG                  |
| Riyadh-2820597                                           | AMB                                                                      | POS                  | AMB                   | POS                                        | POS                  | POS                                        | POS                 | NEG                  |
| Riyadh-2822088                                           | AMB                                                                      | POS                  | AMB                   | POS                                        | POS                  | POS                                        | POS                 | NEG                  |
| Riyadh-3010092                                           | POS                                                                      | AMB                  | AMB                   | POS                                        | POS                  | POS                                        | POS                 | NEG                  |
| Riyadh-3022844                                           | POS                                                                      | AMB                  | AMB                   | POS                                        | POS                  | POS                                        | POS                 | NEG                  |
| Riyadh-3108214-2                                         | POS                                                                      | AMB                  | NEG                   | POS                                        | POS                  | POS                                        | POS                 | NEG                  |
| Riyadh-2823926                                           | AMB                                                                      | POS                  | AMB                   | POS                                        | POS                  | POS                                        | POS                 | NEG                  |
| Riyadh-1                                                 | POS                                                                      | AMB                  | AMB                   | POS                                        | POS                  | POS                                        | POS                 | NEG                  |
| Riyadh-2818388                                           | AMB                                                                      | POS                  | AMB                   | POS                                        | POS                  | POS                                        | POS                 | NEG                  |
| Riyadh-2813215                                           | AMB                                                                      | POS                  | AMB                   | POS                                        | POS                  | POS                                        | POS                 | NEG                  |
| <b>CC9/ST834-MRSA-(atypical SCCmec )</b>                 |                                                                          |                      |                       |                                            |                      |                                            |                     |                      |
| Riyadh-3103521                                           | POS                                                                      | AMB                  | AMB                   | POS                                        | POS                  | POS                                        | POS                 | NEG                  |
| <b>CC22-MRSA-IV, Barnim/UK-EMRSA-15</b>                  |                                                                          |                      |                       |                                            |                      |                                            |                     |                      |
| Riyadh-2553350                                           | AMB                                                                      | AMB                  | POS                   | NEG                                        | NEG                  | POS                                        | POS                 | NEG                  |
| Riyadh-2571758                                           | AMB                                                                      | POS                  | AMB                   | NEG                                        | NEG                  | POS                                        | POS                 | NEG                  |
| Riyadh-3029203                                           | AMB                                                                      | POS                  | AMB                   | NEG                                        | NEG                  | POS                                        | POS                 | NEG                  |
| Riyadh-3039785                                           | AMB                                                                      | POS                  | AMB                   | NEG                                        | NEG                  | POS                                        | POS                 | NEG                  |
| Riyadh-3105594                                           | AMB                                                                      | POS                  | AMB                   | NEG                                        | NEG                  | POS                                        | POS                 | NEG                  |
| Riyadh_IC_204-2                                          | AMB                                                                      | POS                  | AMB                   | NEG                                        | NEG                  | POS                                        | POS                 | NEG                  |
| Riyadh-3003974                                           | AMB                                                                      | POS                  | AMB                   | NEG                                        | NEG                  | POS                                        | POS                 | NEG                  |
| Riyadh_IC_067                                            | AMB                                                                      | POS                  | AMB                   | NEG                                        | NEG                  | POS                                        | POS                 | NEG                  |
| Riyadh-2988627                                           | AMB                                                                      | POS                  | AMB                   | NEG                                        | NEG                  | POS                                        | POS                 | NEG                  |
| Riyadh-3112581                                           | AMB                                                                      | AMB                  | POS                   | NEG                                        | NEG                  | POS                                        | POS                 | NEG                  |
| <b>CC22-MRSA-IV [PVL+]</b>                               |                                                                          |                      |                       |                                            |                      |                                            |                     |                      |
| Riyadh-2781996-1                                         | AMB                                                                      | POS                  | AMB                   | NEG                                        | NEG                  | POS                                        | POS                 | NEG                  |
| Riyadh-3103432                                           | AMB                                                                      | POS                  | AMB                   | NEG                                        | NEG                  | POS                                        | POS                 | NEG                  |
| Riyadh-3026502                                           | NEG                                                                      | AMB                  | POS                   | NEG                                        | NEG                  | POS                                        | POS                 | NEG                  |
| Riyadh-3081378-2                                         | AMB                                                                      | AMB                  | POS                   | NEG                                        | NEG                  | POS                                        | POS                 | NEG                  |
| Riyadh_IC_185                                            | AMB                                                                      | POS                  | AMB                   | NEG                                        | NEG                  | POS                                        | POS                 | NEG                  |
| Riyadh_IC_204-1                                          | AMB                                                                      | POS                  | AMB                   | NEG                                        | NEG                  | POS                                        | POS                 | NEG                  |
| Riyadh-2559371                                           | AMB                                                                      | AMB                  | AMB                   | NEG                                        | NEG                  | POS                                        | POS                 | NEG                  |
| Riyadh-2753975                                           | AMB                                                                      | POS                  | AMB                   | NEG                                        | NEG                  | POS                                        | POS                 | NEG                  |
| Riyadh-2775605                                           | AMB                                                                      | POS                  | AMB                   | NEG                                        | NEG                  | POS                                        | POS                 | NEG                  |
| Riyadh-2781996-2                                         | AMB                                                                      | AMB                  | POS                   | NEG                                        | NEG                  | POS                                        | POS                 | NEG                  |
| Riyadh-2823783-2                                         | AMB                                                                      | POS                  | POS                   | NEG                                        | NEG                  | POS                                        | POS                 | NEG                  |
| Riyadh-2876601                                           | AMB                                                                      | AMB                  | POS                   | NEG                                        | NEG                  | POS                                        | POS                 | NEG                  |
| Riyadh-3036074                                           | AMB                                                                      | POS                  | AMB                   | NEG                                        | NEG                  | POS                                        | POS                 | NEG                  |
| Riyadh-3053099                                           | AMB                                                                      | POS                  | AMB                   | NEG                                        | NEG                  | POS                                        | POS                 | NEG                  |
| Riyadh-3055366                                           | AMB                                                                      | POS                  | AMB                   | NEG                                        | NEG                  | POS                                        | POS                 | NEG                  |
| Riyadh-3082712                                           | AMB                                                                      | POS                  | AMB                   | NEG                                        | NEG                  | POS                                        | POS                 | NEG                  |
| Riyadh-3087502                                           | NEG                                                                      | AMB                  | POS                   | NEG                                        | NEG                  | AMB                                        | POS                 | NEG                  |
| Riyadh-6                                                 | AMB                                                                      | AMB                  | POS                   | NEG                                        | NEG                  | POS                                        | POS                 | NEG                  |
| Riyadh-7                                                 | AMB                                                                      | AMB                  | POS                   | NEG                                        | NEG                  | POS                                        | POS                 | NEG                  |
| Riyadh-8                                                 | AMB                                                                      | AMB                  | POS                   | NEG                                        | NEG                  | POS                                        | POS                 | NEG                  |
| <b>CC30-MRSA-IV [PVL+], Southwest Pacific Clone</b>      |                                                                          |                      |                       |                                            |                      |                                            |                     |                      |
| Riyadh-10                                                | NEG                                                                      | POS                  | AMB                   | NEG                                        | NEG                  | NEG                                        | NEG                 | POS                  |
| Riyadh_IC_123                                            | AMB                                                                      | POS                  | AMB                   | NEG                                        | NEG                  | NEG                                        | NEG                 | POS                  |
| Riyadh-3080713                                           | NEG                                                                      | POS                  | AMB                   | NEG                                        | NEG                  | NEG                                        | NEG                 | POS                  |
| Riyadh-2803856                                           | NEG                                                                      | POS                  | AMB                   | NEG                                        | NEG                  | NEG                                        | NEG                 | POS                  |
| Riyadh-2817276-1                                         | AMB                                                                      | POS                  | AMB                   | NEG                                        | NEG                  | NEG                                        | NEG                 | POS                  |
| Riyadh-2817571-2                                         | AMB                                                                      | POS                  | AMB                   | NEG                                        | NEG                  | NEG                                        | NEG                 | POS                  |
| Riyadh-3033868                                           | NEG                                                                      | POS                  | AMB                   | NEG                                        | NEG                  | NEG                                        | NEG                 | POS                  |
| Riyadh-2550108                                           | AMB                                                                      | POS                  | AMB                   | NEG                                        | NEG                  | NEG                                        | NEG                 | POS                  |
| Riyadh-3095056-2                                         | NEG                                                                      | POS                  | NEG                   | NEG                                        | NEG                  | NEG                                        | NEG                 | POS                  |
| Riyadh-2819899                                           | NEG                                                                      | POS                  | AMB                   | NEG                                        | NEG                  | NEG                                        | NEG                 | POS                  |
| Riyadh-2821805                                           | NEG                                                                      | POS                  | NEG                   | NEG                                        | NEG                  | NEG                                        | NEG                 | POS                  |
| Riyadh-3013928                                           | NEG                                                                      | POS                  | AMB                   | NEG                                        | NEG                  | NEG                                        | NEG                 | POS                  |
| Riyadh-3029402                                           | NEG                                                                      | POS                  | AMB                   | NEG                                        | NEG                  | NEG                                        | NEG                 | POS                  |
| <b>CC45/agr IV-MRSA-IV, WA MRSA-23</b>                   |                                                                          |                      |                       |                                            |                      |                                            |                     |                      |
| Riyadh-3081378-1                                         | NEG                                                                      | NEG                  | POS                   | NEG                                        | NEG                  | NEG                                        | NEG                 | POS                  |
| <b>CC80-MRSA-IV</b>                                      |                                                                          |                      |                       |                                            |                      |                                            |                     |                      |
| Riyadh-3107635                                           | POS                                                                      | AMB                  | AMB                   | POS                                        | POS                  | POS                                        | POS                 | NEG                  |
| Riyadh-2987458                                           | AMB                                                                      | POS                  | AMB                   | POS                                        | POS                  | POS                                        | POS                 | NEG                  |
| <b>CC80-MRSA-IV [PVL+], European caMRSA Clone</b>        |                                                                          |                      |                       |                                            |                      |                                            |                     |                      |
| Riyadh-2988048                                           | POS                                                                      | AMB                  | NEG                   | POS                                        | POS                  | POS                                        | POS                 | NEG                  |
| Riyadh-2990585-2                                         | POS                                                                      | AMB                  | NEG                   | POS                                        | POS                  | POS                                        | POS                 | NEG                  |
| Riyadh-2990585-1                                         | AMB                                                                      | POS                  | AMB                   | POS                                        | POS                  | POS                                        | POS                 | NEG                  |
| Riyadh-2826033                                           | POS                                                                      | AMB                  | AMB                   | POS                                        | POS                  | POS                                        | POS                 | NEG                  |
| Riyadh-1601562                                           | POS                                                                      | AMB                  | AMB                   | POS                                        | POS                  | POS                                        | POS                 | NEG                  |
| Riyadh-2569940                                           | POS                                                                      | AMB                  | AMB                   | POS                                        | POS                  | POS                                        | POS                 | NEG                  |
| Riyadh-2571692                                           | POS                                                                      | AMB                  | AMB                   | POS                                        | POS                  | POS                                        | POS                 | NEG                  |
| Riyadh-2763029                                           | AMB                                                                      | POS                  | AMB                   | POS                                        | POS                  | POS                                        | POS                 | NEG                  |
| Riyadh-2767090                                           | AMB                                                                      | POS                  | NEG                   | POS                                        | POS                  | POS                                        | POS                 | NEG                  |
| Riyadh-2775130                                           | AMB                                                                      | POS                  | NEG                   | POS                                        | POS                  | POS                                        | POS                 | NEG                  |
| Riyadh-2778256                                           | AMB                                                                      | POS                  | NEG                   | POS                                        | POS                  | POS                                        | POS                 | NEG                  |
| Riyadh-2817505                                           | AMB                                                                      | POS                  | AMB                   | POS                                        | POS                  | POS                                        | POS                 | NEG                  |
| Riyadh-3024912                                           | POS                                                                      | AMB                  | NEG                   | POS                                        | POS                  | POS                                        | POS                 | NEG                  |
| Riyadh-2788690                                           | AMB                                                                      | POS                  | NEG                   | POS                                        | POS                  | POS                                        | POS                 | NEG                  |
| Riyadh-2829034                                           | POS                                                                      | AMB                  | AMB                   | POS                                        | POS                  | POS                                        | POS                 | NEG                  |
| Riyadh-3                                                 | POS                                                                      | AMB                  | AMB                   | POS                                        | POS                  | POS                                        | POS                 | NEG                  |
| Riyadh-5                                                 | POS                                                                      | AMB                  | AMB                   | POS                                        | POS                  | POS                                        | POS                 | NEG                  |
| Riyadh-2553167                                           | POS                                                                      | AMB                  | AMB                   | POS                                        | POS                  | POS                                        | POS                 | NEG                  |
| Riyadh-3002592                                           | AMB                                                                      | POS                  | AMB                   | POS                                        | POS                  | POS                                        | POS                 | NEG                  |
| <b>CC88-MRSA-IV [PVL+]</b>                               |                                                                          |                      |                       |                                            |                      |                                            |                     |                      |
| Riyadh-2736996                                           | AMB                                                                      | POS                  | AMB                   | POS                                        | POS                  | POS                                        | POS                 | NEG                  |
| Riyadh-2942396                                           | AMB                                                                      | POS                  | AMB                   | POS                                        | POS                  | POS                                        | POS                 | NEG                  |
| Riyadh-3105391                                           | POS                                                                      | AMB                  | AMB                   | POS                                        | POS                  | POS                                        | POS                 | NEG                  |
| <b>CC97-MRSA-V</b>                                       |                                                                          |                      |                       |                                            |                      |                                            |                     |                      |
| Riyadh-0297622                                           | AMB                                                                      | POS                  | AMB                   | POS                                        | POS                  | POS                                        | POS                 | NEG                  |
| Riyadh-3025471                                           | POS                                                                      | AMB                  | AMB                   | POS                                        | POS                  | POS                                        | POS                 | NEG                  |

|                                                          | VIRULENCE : STAPHYLOCOCCAL SUPERANTIGEN/ENTEROTOXIN-LIKE GENES (SET/SSL) |               |                      |                                              |                        |                           |                      |                                                    |                 |       |                 |       |
|----------------------------------------------------------|--------------------------------------------------------------------------|---------------|----------------------|----------------------------------------------|------------------------|---------------------------|----------------------|----------------------------------------------------|-----------------|-------|-----------------|-------|
|                                                          | ssl10/set4                                                               | ssl10 (RF122) | ssl10/set4 (MRSA252) | ssl11/set2 (COL)                             | ssl11+set2 (Mu50+N315) | ssl11+set2 (MW2+MSSA 476) | ssl11/set2 (MRSA252) | setB3                                              | setB3 (MRSA252) | setB2 | setB2 (MRSA252) | setB1 |
|                                                          | staphylococcal superantigen-like protein 10                              |               |                      | staphylococcal superantigene-like protein 11 |                        |                           |                      | staphylococcal exotoxin-like protein, second locus |                 |       |                 |       |
| <b>CC1-MRSA-IV&amp;SCCFus, WA MRSA-1/45</b>              |                                                                          |               |                      |                                              |                        |                           |                      |                                                    |                 |       |                 |       |
| Riyadh-3108609                                           | POS                                                                      | NEG           | AMB                  | NEG                                          | NEG                    | POS                       | NEG                  | POS                                                | NEG             | POS   | NEG             | POS   |
| Riyadh-2913235                                           | POS                                                                      | AMB           | AMB                  | NEG                                          | NEG                    | NEG                       | NEG                  | POS                                                | NEG             | POS   | NEG             | POS   |
| <b>CC1/ST772-MRSA-V [PVL+], "Bengal Bay Clone/WA 1"</b>  |                                                                          |               |                      |                                              |                        |                           |                      |                                                    |                 |       |                 |       |
| Riyadh-2819026                                           | POS                                                                      | AMB           | AMB                  | NEG                                          | NEG                    | NEG                       | NEG                  | POS                                                | NEG             | POS   | NEG             | POS   |
| <b>CC5-MRSA-IV, Paediatric clone</b>                     |                                                                          |               |                      |                                              |                        |                           |                      |                                                    |                 |       |                 |       |
| Riyadh-2915327-1                                         | POS                                                                      | NEG           | AMB                  | NEG                                          | POS                    | NEG                       | NEG                  | POS                                                | NEG             | POS   | NEG             | POS   |
| Riyadh-2915327-2                                         | POS                                                                      | NEG           | AMB                  | NEG                                          | POS                    | NEG                       | NEG                  | POS                                                | NEG             | POS   | NEG             | POS   |
| Riyadh-2                                                 | POS                                                                      | AMB           | AMB                  | NEG                                          | POS                    | NEG                       | NEG                  | POS                                                | NEG             | POS   | NEG             | POS   |
| <b>CC5-MRSA-IV [PVL+], Paediatric clone</b>              |                                                                          |               |                      |                                              |                        |                           |                      |                                                    |                 |       |                 |       |
| Riyadh-2986666                                           | POS                                                                      | AMB           | AMB                  | NEG                                          | POS                    | NEG                       | NEG                  | POS                                                | NEG             | POS   | NEG             | POS   |
| Riyadh-2913235                                           | POS                                                                      | AMB           | AMB                  | NEG                                          | POS                    | NEG                       | NEG                  | POS                                                | NEG             | POS   | NEG             | POS   |
| <b>CC5-MRSA-IVvar, "Maltese Clone"</b>                   |                                                                          |               |                      |                                              |                        |                           |                      |                                                    |                 |       |                 |       |
| Riyadh-2983654                                           | POS                                                                      | NEG           | AMB                  | NEG                                          | POS                    | NEG                       | NEG                  | POS                                                | NEG             | POS   | NEG             | POS   |
| Riyadh-4                                                 | POS                                                                      | AMB           | AMB                  | NEG                                          | POS                    | NEG                       | NEG                  | POS                                                | NEG             | POS   | NEG             | POS   |
| Riyadh-2790233                                           | POS                                                                      | NEG           | AMB                  | NEG                                          | POS                    | NEG                       | NEG                  | POS                                                | NEG             | POS   | NEG             | POS   |
| <b>CC5-MRSA-V</b>                                        |                                                                          |               |                      |                                              |                        |                           |                      |                                                    |                 |       |                 |       |
| Riyadh-2568944                                           | POS                                                                      | AMB           | AMB                  | NEG                                          | POS                    | NEG                       | NEG                  | POS                                                | NEG             | POS   | NEG             | POS   |
| <b>CC6-MRSA-IV, WA MRSA-51/66</b>                        |                                                                          |               |                      |                                              |                        |                           |                      |                                                    |                 |       |                 |       |
| Riyadh-2556168                                           | POS                                                                      | AMB           | AMB                  | NEG                                          | POS                    | NEG                       | NEG                  | POS                                                | NEG             | POS   | NEG             | POS   |
| Riyadh-2824507                                           | POS                                                                      | AMB           | NEG                  | NEG                                          | POS                    | NEG                       | NEG                  | POS                                                | NEG             | POS   | NEG             | POS   |
| Riyadh-2990831                                           | POS                                                                      | AMB           | AMB                  | NEG                                          | POS                    | NEG                       | NEG                  | POS                                                | NEG             | POS   | NEG             | POS   |
| <b>CC9/ST239-MRSA-III, Vienna/Hungarian/Brazilian Cl</b> |                                                                          |               |                      |                                              |                        |                           |                      |                                                    |                 |       |                 |       |
| Riyadh-9                                                 | POS                                                                      | AMB           | AMB                  | POS                                          | NEG                    | NEG                       | NEG                  | POS                                                | NEG             | POS   | NEG             | POS   |
| Riyadh-3028763                                           | POS                                                                      | AMB           | AMB                  | POS                                          | NEG                    | NEG                       | NEG                  | POS                                                | NEG             | POS   | NEG             | POS   |
| Riyadh-2817437                                           | POS                                                                      | AMB           | AMB                  | POS                                          | NEG                    | NEG                       | NEG                  | POS                                                | NEG             | POS   | NEG             | POS   |
| Riyadh-2793706                                           | POS                                                                      | NEG           | AMB                  | POS                                          | NEG                    | NEG                       | NEG                  | POS                                                | NEG             | POS   | NEG             | POS   |
| Riyadh-2818797                                           | POS                                                                      | AMB           | AMB                  | POS                                          | NEG                    | NEG                       | NEG                  | POS                                                | NEG             | POS   | NEG             | POS   |
| Riyadh-2822825                                           | POS                                                                      | AMB           | AMB                  | POS                                          | NEG                    | NEG                       | AMB                  | NEG                                                | POS             | NEG   | POS             | NEG   |
| Riyadh-2888905                                           | POS                                                                      | AMB           | AMB                  | POS                                          | NEG                    | NEG                       | NEG                  | POS                                                | NEG             | POS   | NEG             | POS   |
| Riyadh-2888915                                           | POS                                                                      | AMB           | AMB                  | POS                                          | NEG                    | NEG                       | NEG                  | POS                                                | NEG             | POS   | NEG             | POS   |
| Riyadh-2567782                                           | POS                                                                      | NEG           | AMB                  | POS                                          | NEG                    | NEG                       | NEG                  | POS                                                | NEG             | POS   | NEG             | POS   |
| Riyadh-2891670                                           | POS                                                                      | AMB           | AMB                  | POS                                          | NEG                    | NEG                       | NEG                  | POS                                                | NEG             | POS   | NEG             | POS   |
| Riyadh-3006920                                           | POS                                                                      | NEG           | AMB                  | POS                                          | NEG                    | NEG                       | NEG                  | POS                                                | NEG             | POS   | NEG             | POS   |
| Riyadh-2817276-1                                         | POS                                                                      | AMB           | AMB                  | POS                                          | NEG                    | NEG                       | NEG                  | POS                                                | NEG             | POS   | NEG             | POS   |
| Riyadh-0295102                                           | POS                                                                      | AMB           | AMB                  | POS                                          | NEG                    | NEG                       | NEG                  | POS                                                | NEG             | POS   | NEG             | POS   |
| Riyadh-2820597                                           | POS                                                                      | AMB           | AMB                  | POS                                          | NEG                    | NEG                       | NEG                  | POS                                                | NEG             | POS   | NEG             | POS   |
| Riyadh-2822088                                           | POS                                                                      | AMB           | AMB                  | POS                                          | NEG                    | NEG                       | NEG                  | POS                                                | NEG             | POS   | NEG             | POS   |
| Riyadh-3010092                                           | POS                                                                      | NEG           | AMB                  | POS                                          | NEG                    | NEG                       | NEG                  | POS                                                | NEG             | POS   | NEG             | POS   |
| Riyadh-3022844                                           | POS                                                                      | AMB           | AMB                  | POS                                          | NEG                    | NEG                       | NEG                  | POS                                                | NEG             | POS   | NEG             | POS   |
| Riyadh-3108214-2                                         | POS                                                                      | NEG           | AMB                  | POS                                          | NEG                    | NEG                       | NEG                  | POS                                                | NEG             | POS   | NEG             | POS   |
| Riyadh-2823926                                           | POS                                                                      | AMB           | AMB                  | POS                                          | NEG                    | NEG                       | NEG                  | POS                                                | NEG             | POS   | NEG             | POS   |
| Riyadh-1                                                 | POS                                                                      | AMB           | AMB                  | POS                                          | NEG                    | NEG                       | NEG                  | POS                                                | NEG             | POS   | NEG             | POS   |
| Riyadh-2818388                                           | POS                                                                      | AMB           | AMB                  | POS                                          | NEG                    | NEG                       | NEG                  | POS                                                | NEG             | POS   | NEG             | POS   |
| Riyadh-3112115                                           | POS                                                                      | AMB           | AMB                  | POS                                          | NEG                    | NEG                       | NEG                  | POS                                                | NEG             | POS   | NEG             | POS   |
| <b>CC9/ST834-MRSA-(atypical SCCmec)</b>                  |                                                                          |               |                      |                                              |                        |                           |                      |                                                    |                 |       |                 |       |
| Riyadh-3103521                                           | POS                                                                      | NEG           | AMB                  | NEG                                          | NEG                    | NEG                       | NEG                  | POS                                                | NEG             | POS   | NEG             | POS   |
| <b>CC22-MRSA-IV, Barnim/UK-EMRSA-15</b>                  |                                                                          |               |                      |                                              |                        |                           |                      |                                                    |                 |       |                 |       |
| Riyadh-2553350                                           | POS                                                                      | NEG           | AMB                  | NEG                                          | NEG                    | NEG                       | NEG                  | POS                                                | NEG             | POS   | NEG             | POS   |
| Riyadh-2571758                                           | AMB                                                                      | NEG           | POS                  | NEG                                          | NEG                    | #ZAH1!                    | NEG                  | NEG                                                | NEG             | NEG   | NEG             | NEG   |
| Riyadh-3029203                                           | POS                                                                      | NEG           | AMB                  | NEG                                          | NEG                    | NEG                       | NEG                  | POS                                                | NEG             | POS   | NEG             | POS   |
| Riyadh-3039785                                           | POS                                                                      | NEG           | AMB                  | NEG                                          | NEG                    | NEG                       | NEG                  | POS                                                | NEG             | POS   | NEG             | POS   |
| Riyadh-3105594                                           | POS                                                                      | NEG           | AMB                  | NEG                                          | NEG                    | NEG                       | NEG                  | POS                                                | NEG             | POS   | NEG             | POS   |
| Riyadh_IC_204-2                                          | POS                                                                      | NEG           | AMB                  | NEG                                          | NEG                    | NEG                       | NEG                  | POS                                                | NEG             | POS   | NEG             | POS   |
| Riyadh-3003974                                           | POS                                                                      | NEG           | AMB                  | NEG                                          | NEG                    | NEG                       | NEG                  | POS                                                | NEG             | POS   | NEG             | POS   |
| Riyadh_IC_067                                            | POS                                                                      | NEG           | AMB                  | NEG                                          | NEG                    | NEG                       | NEG                  | POS                                                | NEG             | POS   | NEG             | POS   |
| Riyadh-2988627                                           | POS                                                                      | NEG           | AMB                  | NEG                                          | NEG                    | NEG                       | NEG                  | POS                                                | NEG             | POS   | NEG             | POS   |
| Riyadh-3112581                                           | POS                                                                      | NEG           | NEG                  | NEG                                          | NEG                    | NEG                       | NEG                  | POS                                                | NEG             | POS   | NEG             | POS   |
| <b>CC22-MRSA-IV [PVL+]</b>                               |                                                                          |               |                      |                                              |                        |                           |                      |                                                    |                 |       |                 |       |
| Riyadh-2781995-1                                         | POS                                                                      | NEG           | AMB                  | NEG                                          | NEG                    | NEG                       | NEG                  | POS                                                | NEG             | POS   | NEG             | POS   |
| Riyadh-3103421                                           | POS                                                                      | AMB           | AMB                  | NEG                                          | NEG                    | NEG                       | NEG                  | POS                                                | NEG             | POS   | NEG             | POS   |
| Riyadh-3026502                                           | POS                                                                      | NEG           | AMB                  | NEG                                          | NEG                    | NEG                       | NEG                  | POS                                                | NEG             | POS   | NEG             | POS   |
| Riyadh-3081378-2                                         | POS                                                                      | NEG           | AMB                  | NEG                                          | NEG                    | NEG                       | NEG                  | POS                                                | NEG             | POS   | NEG             | POS   |
| Riyadh_IC_185                                            | POS                                                                      | AMB           | AMB                  | NEG                                          | NEG                    | NEG                       | NEG                  | POS                                                | NEG             | POS   | NEG             | POS   |
| Riyadh_IC_204-1                                          | POS                                                                      | NEG           | AMB                  | NEG                                          | NEG                    | NEG                       | NEG                  | POS                                                | NEG             | POS   | NEG             | POS   |
| Riyadh-159371                                            | POS                                                                      | NEG           | AMB                  | NEG                                          | NEG                    | NEG                       | NEG                  | POS                                                | NEG             | POS   | NEG             | POS   |
| Riyadh-2753975                                           | POS                                                                      | NEG           | AMB                  | NEG                                          | NEG                    | NEG                       | NEG                  | POS                                                | NEG             | POS   | NEG             | POS   |
| Riyadh-2775605                                           | POS                                                                      | NEG           | AMB                  | NEG                                          | NEG                    | NEG                       | NEG                  | POS                                                | NEG             | POS   | NEG             | POS   |
| Riyadh-2781996-2                                         | POS                                                                      | NEG           | NEG                  | NEG                                          | NEG                    | NEG                       | NEG                  | POS                                                | NEG             | POS   | NEG             | POS   |
| Riyadh-2823783-2                                         | POS                                                                      | NEG           | AMB                  | NEG                                          | NEG                    | NEG                       | NEG                  | POS                                                | NEG             | POS   | NEG             | POS   |
| Riyadh-276501                                            | POS                                                                      | AMB           | AMB                  | NEG                                          | NEG                    | NEG                       | NEG                  | POS                                                | NEG             | POS   | NEG             | POS   |
| Riyadh-3036074                                           | POS                                                                      | NEG           | AMB                  | NEG                                          | NEG                    | NEG                       | NEG                  | POS                                                | NEG             | POS   | NEG             | POS   |
| Riyadh-3053099                                           | POS                                                                      | NEG           | AMB                  | NEG                                          | NEG                    | NEG                       | NEG                  | POS                                                | NEG             | POS   | NEG             | POS   |
| Riyadh-3055366                                           | POS                                                                      | NEG           | AMB                  | NEG                                          | NEG                    | NEG                       | NEG                  | POS                                                | NEG             | POS   | NEG             | POS   |
| Riyadh-3087712                                           | POS                                                                      | NEG           | AMB                  | NEG                                          | NEG                    | NEG                       | NEG                  | POS                                                | NEG             | POS   | NEG             | POS   |
| Riyadh-3087502                                           | POS                                                                      | NEG           | AMB                  | NEG                                          | NEG                    | NEG                       | NEG                  | POS                                                | NEG             | POS   | NEG             | POS   |
| Riyadh-6                                                 | POS                                                                      | NEG           | AMB                  | NEG                                          | NEG                    | NEG                       | NEG                  | POS                                                | NEG             | POS   | NEG             | POS   |
| Riyadh-7                                                 | POS                                                                      | NEG           | AMB                  | NEG                                          | NEG                    | NEG                       | NEG                  | POS                                                | NEG             | POS   | NEG             | POS   |
| Riyadh-8                                                 | POS                                                                      | NEG           | AMB                  | NEG                                          | NEG                    | NEG                       | NEG                  | POS                                                | NEG             | POS   | NEG             | POS   |
| <b>CC30-MRSA-IV [PVL+], Southwest Pacific Clone</b>      |                                                                          |               |                      |                                              |                        |                           |                      |                                                    |                 |       |                 |       |
| Riyadh-10                                                | AMB                                                                      | NEG           | POS                  | NEG                                          | NEG                    | NEG                       | POS                  | NEG                                                | POS             | NEG   | POS             | POS   |
| Riyadh_IC_123                                            | AMB                                                                      | NEG           | POS                  | NEG                                          | NEG                    | NEG                       | POS                  | NEG                                                | POS             | NEG   | POS             | POS   |
| Riyadh-3080713                                           | POS                                                                      | NEG           | AMB                  | NEG                                          | NEG                    | NEG                       | POS                  | NEG                                                | POS             | NEG   | POS             | POS   |
| Riyadh-2803856                                           | AMB                                                                      | NEG           | POS                  | NEG                                          | NEG                    | NEG                       | POS                  | NEG                                                | POS             | NEG   | POS             | POS   |
| Riyadh-2817276-1                                         | AMB                                                                      | NEG           | POS                  | NEG                                          | NEG                    | NEG                       | POS                  | NEG                                                | POS             | NEG   | POS             | POS   |
| Riyadh-2817571-2                                         | AMB                                                                      | NEG           | POS                  | NEG                                          | NEG                    | NEG                       | POS                  | NEG                                                | POS             | NEG   | POS             | POS   |
| Riyadh-3033868                                           | POS                                                                      | NEG           | AMB                  | NEG                                          | NEG                    | NEG                       | POS                  | NEG                                                | POS             | NEG   | POS             | POS   |
| Riyadh-2550108                                           | AMB                                                                      | NEG           | AMB                  | NEG                                          | NEG                    | NEG                       | POS                  | NEG                                                | POS             | NEG   | POS             | POS   |
| Riyadh-3095056-2                                         | POS                                                                      | NEG           | AMB                  | NEG                                          | NEG                    | NEG                       | POS                  | NEG                                                | POS             | NEG   | POS             | POS   |
| Riyadh-2819899                                           | POS                                                                      | NEG           | AMB                  | NEG                                          | NEG                    | NEG                       | POS                  | NEG                                                | POS             | NEG   | POS             | POS   |
| Riyadh-2821805                                           | AMB                                                                      | NEG           | POS                  | NEG                                          | NEG                    | NEG                       | POS                  | NEG                                                | POS             | NEG   | POS             | POS   |
| Riyadh-3013928                                           | AMB                                                                      | NEG           | POS                  | NEG                                          | NEG                    | NEG                       | POS                  | NEG                                                | POS             | NEG   | POS             | POS   |
| Riyadh-3029402                                           | POS                                                                      | NEG           | AMB                  | NEG                                          | NEG                    | NEG                       | POS                  | NEG                                                | POS             | NEG   | POS             | POS   |
| <b>CC45/agr IV-MRSA-IV, WA MRSA-23</b>                   |                                                                          |               |                      |                                              |                        |                           |                      |                                                    |                 |       |                 |       |
| Riyadh-3081378-1                                         | AMB                                                                      | NEG           | POS                  | NEG                                          | NEG                    | NEG                       | NEG                  | POS                                                | NEG             | POS   | NEG             | NEG   |
| <b>CC80-MRSA-IV</b>                                      |                                                                          |               |                      |                                              |                        |                           |                      |                                                    |                 |       |                 |       |
| Riyadh-3107635                                           | POS                                                                      | AMB           | AMB                  | NEG                                          | NEG                    | NEG                       | NEG                  | POS                                                | NEG             | POS   | NEG             | POS   |
| Riyadh-2987458                                           | POS                                                                      | NEG           | AMB                  | NEG                                          | NEG                    | NEG                       | NEG                  | POS                                                | NEG             | POS   | NEG             | POS   |
| <b>CC80-MRSA-IV [PVL+], European caMRSA Clone</b>        |                                                                          |               |                      |                                              |                        |                           |                      |                                                    |                 |       |                 |       |
| Riyadh-2988048                                           | POS                                                                      | NEG           | AMB                  | NEG                                          | NEG                    | NEG                       | NEG                  | POS                                                | NEG             | POS   | NEG             | POS   |
| Riyadh-2990585-2                                         | POS                                                                      | NEG           | AMB                  | NEG                                          | NEG                    | NEG                       | NEG                  | POS                                                | NEG             | POS   | NEG             | POS   |
| Riyadh-2990585-1                                         | POS                                                                      | NEG           | AMB                  | NEG                                          | NEG                    | NEG                       | NEG                  | POS                                                | NEG             | POS   | NEG             | POS   |
| Riyadh-2826033                                           | POS                                                                      | AMB           | AMB                  | NEG                                          | NEG                    | NEG                       | NEG                  | POS                                                | NEG             | POS   | NEG             | POS   |
| Riyadh-1601562                                           | POS                                                                      | NEG           | AMB                  | NEG                                          | NEG                    | NEG                       | NEG                  | POS                                                | NEG             | POS   | NEG             | POS   |
| Riyadh-2569940                                           | POS                                                                      | AMB           | AMB                  | NEG                                          | NEG                    | NEG                       | NEG                  | POS                                                | NEG             | POS   | NEG             | POS   |
| Riyadh-2571692                                           | POS                                                                      | AMB           | AMB                  | NEG                                          | NEG                    | NEG                       | NEG                  | POS                                                | NEG             | POS   | NEG             | POS   |
| Riyadh-2763029                                           | POS                                                                      | AMB           | AMB                  | NEG                                          | NEG                    | NEG                       | NEG                  | POS                                                | NEG             | POS   | NEG             | POS   |
| Riyadh-2767090                                           | POS                                                                      | AMB           | AMB                  | NEG                                          | NEG                    | NEG                       | NEG                  | POS                                                | NEG             | POS   | NEG             | POS   |
| Riyadh-2775130                                           | POS                                                                      | NEG           | AMB                  | NEG                                          | NEG                    | NEG                       | NEG                  | POS                                                | NEG             | POS   | NEG             | POS   |
| Riyadh-2778256                                           | POS                                                                      | AMB           | AMB                  | NEG                                          | NEG                    | NEG                       | NEG                  | POS                                                | NEG             | POS   | NEG             | POS   |
| Riyadh-2817505                                           | POS                                                                      | AMB           | AMB                  | NEG                                          | NEG                    | NEG                       | NEG                  | POS                                                | NEG             | POS   | NEG             | POS   |
| Riyadh-3024912                                           | POS                                                                      | NEG           | AMB                  | NEG                                          | NEG                    | NEG                       | NEG                  | POS                                                | NEG             | POS   | NEG             | POS   |
| Riyadh-2786990                                           | POS                                                                      | NEG           | AMB                  | NEG                                          | NEG                    | NEG                       | NEG                  | POS                                                | NEG             | POS   | NEG             | POS   |
| Riyadh-3292034                                           | POS                                                                      | AMB           | AMB                  | NEG                                          | NEG                    | NEG                       | NEG                  | POS                                                | NEG             | POS   | NEG             | POS   |
| Riyadh-3                                                 | POS                                                                      | AMB           | AMB                  | NEG                                          | NEG                    | NEG                       | NEG                  | POS                                                | NEG             | POS   | NEG             | POS   |
| Riyadh-5                                                 | POS                                                                      | AMB           | AMB                  | NEG                                          | NEG                    | NEG                       | NEG                  | POS                                                | NEG             | POS   | NEG             | POS   |
| Riyadh-2553167                                           | POS                                                                      | AMB           | AMB                  | NEG                                          | NEG                    | NEG                       | NEG                  | POS                                                | NEG             | POS   | NEG             | POS   |
| Riyadh-3002592                                           | POS                                                                      | AMB           | AMB                  | NEG                                          | NEG                    | NEG                       | NEG                  | POS                                                | NEG             | POS   | NEG             | POS   |
| <b>CC88-MRSA-IV [PVL+]</b>                               |                                                                          |               |                      |                                              |                        |                           |                      |                                                    |                 |       |                 |       |
| Riyadh-2736996                                           | POS                                                                      | AMB           | AMB                  | NEG                                          | NEG                    | NEG                       | AMB                  | POS                                                | NEG             | POS   | NEG             | POS   |
| Riyadh-2942396                                           | POS                                                                      | AMB           | AMB                  | NEG                                          | NEG                    | NEG                       | POS                  | POS                                                | NEG             | POS   | NEG             | POS   |
| Riyadh-3105391                                           | POS                                                                      | NEG           | AMB                  | NEG                                          | NEG                    | NEG                       | AMB                  | POS                                                | NEG             | POS   | NEG             | POS   |
| <b>CC97-MRSA-V</b>                                       |                                                                          |               |                      |                                              |                        |                           |                      |                                                    |                 |       |                 |       |
| Riyadh-0297622                                           | POS                                                                      | AMB           | AMB                  | NEG                                          | NEG                    | NEG                       | NEG                  | POS                                                | NEG             | POS   | NEG             | POS   |
| Riyadh-3025471                                           | POS                                                                      | NEG           | AMB                  | NEG                                          | NEG                    | POS                       | NEG                  | POS                                                | NEG             | POS   | NEG             | POS   |

|                                                          | CAPSULE- AND BIOFILM-ASSOCIATED GENES |                |                |                                  |                                  |                                 |                                               |
|----------------------------------------------------------|---------------------------------------|----------------|----------------|----------------------------------|----------------------------------|---------------------------------|-----------------------------------------------|
|                                                          | cap 1 (total)                         | cap 5 (total)  | cap 8 (total)  | icaA                             | icaC                             | icaD                            | bap                                           |
|                                                          | Capsule type 1                        | Capsule type 5 | Capsule type 8 | intercellular adhesion protein A | intercellular adhesion protein C | biofilm PIA synthesis protein D | surface protein involved in biofilm formation |
| <b>CC1-MRSA-IV&amp;SCCFus, WA MRSA-1/45</b>              |                                       |                |                |                                  |                                  |                                 |                                               |
| Riyadh-3108609                                           | NEG                                   | NEG            | POS            | POS                              | POS                              | POS                             | NEG                                           |
| Riyadh-2913235                                           | NEG                                   | POS            | NEG            | POS                              | POS                              | POS                             | NEG                                           |
| <b>CC1/ST772-MRSA-V [PVL+], "Bengal Bay Clone/WA I"</b>  |                                       |                |                |                                  |                                  |                                 |                                               |
| Riyadh-2819026                                           | NEG                                   | POS            | NEG            | POS                              | POS                              | POS                             | NEG                                           |
| <b>CC5-MRSA-IV, Paediatric clone</b>                     |                                       |                |                |                                  |                                  |                                 |                                               |
| Riyadh-2915327-1                                         | NEG                                   | POS            | NEG            | POS                              | POS                              | POS                             | NEG                                           |
| Riyadh-2915327-2                                         | NEG                                   | POS            | NEG            | POS                              | POS                              | POS                             | NEG                                           |
| Riyadh-2                                                 | NEG                                   | POS            | NEG            | POS                              | POS                              | POS                             | NEG                                           |
| <b>CC5-MRSA-IV [PVL+], Paediatric clone</b>              |                                       |                |                |                                  |                                  |                                 |                                               |
| Riyadh-2986666                                           | AMB                                   | POS            | NEG            | POS                              | POS                              | POS                             | NEG                                           |
| Riyadh-2913235                                           | NEG                                   | POS            | NEG            | POS                              | POS                              | POS                             | NEG                                           |
| <b>CC5-MRSA-IVvar, "Maltese Clone"</b>                   |                                       |                |                |                                  |                                  |                                 |                                               |
| Riyadh-2983654                                           | AMB                                   | POS            | NEG            | POS                              | POS                              | POS                             | NEG                                           |
| Riyadh-4                                                 | NEG                                   | POS            | NEG            | POS                              | POS                              | POS                             | NEG                                           |
| Riyadh-2790233                                           | NEG                                   | POS            | NEG            | POS                              | POS                              | POS                             | NEG                                           |
| <b>CC5-MRSA-V</b>                                        |                                       |                |                |                                  |                                  |                                 |                                               |
| Riyadh-2568944                                           | NEG                                   | POS            | NEG            | POS                              | POS                              | POS                             | NEG                                           |
| <b>CC6-MRSA-IV, WA MRSA-51/66</b>                        |                                       |                |                |                                  |                                  |                                 |                                               |
| Riyadh-2556168                                           | NEG                                   | NEG            | POS            | POS                              | POS                              | POS                             | NEG                                           |
| Riyadh-2824507                                           | NEG                                   | NEG            | POS            | POS                              | POS                              | POS                             | NEG                                           |
| Riyadh-2990831                                           | AMB                                   | NEG            | POS            | POS                              | POS                              | POS                             | NEG                                           |
| <b>CC9/ST239-MRSA-III, Vienna/Hungarian/Brazilian Cl</b> |                                       |                |                |                                  |                                  |                                 |                                               |
| Riyadh-5                                                 | NEG                                   | NEG            | POS            | POS                              | POS                              | POS                             | NEG                                           |
| Riyadh-3028763                                           | NEG                                   | NEG            | POS            | POS                              | POS                              | POS                             | NEG                                           |
| Riyadh-2817437                                           | NEG                                   | NEG            | POS            | POS                              | POS                              | POS                             | NEG                                           |
| Riyadh-2793706                                           | NEG                                   | NEG            | POS            | POS                              | POS                              | POS                             | NEG                                           |
| Riyadh-2818797                                           | NEG                                   | NEG            | POS            | POS                              | POS                              | POS                             | NEG                                           |
| Riyadh-2822825                                           | NEG                                   | NEG            | POS            | POS                              | POS                              | POS                             | NEG                                           |
| Riyadh-2888905                                           | NEG                                   | NEG            | POS            | POS                              | POS                              | POS                             | NEG                                           |
| Riyadh-2888915                                           | NEG                                   | NEG            | POS            | POS                              | POS                              | POS                             | NEG                                           |
| Riyadh-2567782                                           | NEG                                   | NEG            | POS            | POS                              | POS                              | POS                             | NEG                                           |
| Riyadh-2891670                                           | NEG                                   | NEG            | POS            | POS                              | POS                              | POS                             | NEG                                           |
| Riyadh-3006920                                           | NEG                                   | NEG            | POS            | POS                              | POS                              | POS                             | NEG                                           |
| Riyadh-2811276-1                                         | NEG                                   | NEG            | POS            | POS                              | POS                              | POS                             | NEG                                           |
| Riyadh-0295102                                           | NEG                                   | NEG            | POS            | POS                              | POS                              | POS                             | NEG                                           |
| Riyadh-2820597                                           | NEG                                   | NEG            | POS            | POS                              | POS                              | POS                             | NEG                                           |
| Riyadh-2822088                                           | NEG                                   | NEG            | POS            | POS                              | POS                              | POS                             | NEG                                           |
| Riyadh-3010092                                           | NEG                                   | NEG            | POS            | POS                              | POS                              | POS                             | NEG                                           |
| Riyadh-3022844                                           | NEG                                   | NEG            | POS            | POS                              | POS                              | POS                             | NEG                                           |
| Riyadh-3108214-2                                         | NEG                                   | NEG            | POS            | POS                              | POS                              | POS                             | NEG                                           |
| Riyadh-2823926                                           | NEG                                   | NEG            | POS            | POS                              | POS                              | POS                             | NEG                                           |
| Riyadh-1                                                 | NEG                                   | NEG            | POS            | POS                              | POS                              | POS                             | NEG                                           |
| Riyadh-2818388                                           | NEG                                   | NEG            | POS            | POS                              | POS                              | POS                             | NEG                                           |
| Riyadh-2813215                                           | NEG                                   | NEG            | POS            | POS                              | POS                              | POS                             | NEG                                           |
| <b>CC9/ST834-MRSA-(atypical SCCmec )</b>                 |                                       |                |                |                                  |                                  |                                 |                                               |
| Riyadh-3103521                                           | NEG                                   | NEG            | POS            | POS                              | POS                              | POS                             | NEG                                           |
| <b>CC22-MRSA-IV, Barnim/UK-EMRSA-15</b>                  |                                       |                |                |                                  |                                  |                                 |                                               |
| Riyadh-2553350                                           | NEG                                   | POS            | NEG            | POS                              | POS                              | POS                             | NEG                                           |
| Riyadh-2571758                                           | NEG                                   | POS            | NEG            | POS                              | POS                              | POS                             | NEG                                           |
| Riyadh-3029203                                           | NEG                                   | POS            | NEG            | POS                              | POS                              | POS                             | NEG                                           |
| Riyadh-3039785                                           | NEG                                   | POS            | NEG            | POS                              | POS                              | POS                             | NEG                                           |
| Riyadh-3105594                                           | NEG                                   | POS            | NEG            | POS                              | POS                              | POS                             | NEG                                           |
| Riyadh_IC_204-2                                          | NEG                                   | POS            | NEG            | POS                              | POS                              | POS                             | NEG                                           |
| Riyadh-3003974                                           | NEG                                   | POS            | NEG            | POS                              | POS                              | POS                             | NEG                                           |
| Riyadh_IC_067                                            | NEG                                   | POS            | NEG            | POS                              | POS                              | POS                             | NEG                                           |
| Riyadh-2988627                                           | NEG                                   | POS            | NEG            | POS                              | POS                              | POS                             | NEG                                           |
| Riyadh-3112581                                           | NEG                                   | POS            | NEG            | POS                              | POS                              | POS                             | NEG                                           |
| <b>CC22-MRSA-IV [PVL+]</b>                               |                                       |                |                |                                  |                                  |                                 |                                               |
| Riyadh-2781996-1                                         | NEG                                   | POS            | NEG            | POS                              | POS                              | POS                             | NEG                                           |
| Riyadh-3103432                                           | NEG                                   | POS            | NEG            | POS                              | POS                              | POS                             | NEG                                           |
| Riyadh-3026502                                           | NEG                                   | POS            | NEG            | POS                              | POS                              | POS                             | NEG                                           |
| Riyadh-3081378-2                                         | NEG                                   | POS            | NEG            | POS                              | POS                              | POS                             | NEG                                           |
| Riyadh_IC_185                                            | NEG                                   | POS            | NEG            | POS                              | POS                              | POS                             | NEG                                           |
| Riyadh_IC_204-1                                          | NEG                                   | POS            | NEG            | POS                              | POS                              | POS                             | NEG                                           |
| Riyadh-2559371                                           | NEG                                   | POS            | NEG            | POS                              | POS                              | POS                             | NEG                                           |
| Riyadh-2753975                                           | NEG                                   | POS            | NEG            | POS                              | POS                              | POS                             | NEG                                           |
| Riyadh-2775605                                           | NEG                                   | POS            | NEG            | POS                              | POS                              | POS                             | NEG                                           |
| Riyadh-2781996-2                                         | NEG                                   | POS            | NEG            | POS                              | POS                              | POS                             | NEG                                           |
| Riyadh-2822783-2                                         | NEG                                   | POS            | NEG            | POS                              | POS                              | POS                             | NEG                                           |
| Riyadh-2876601                                           | NEG                                   | POS            | NEG            | POS                              | POS                              | POS                             | NEG                                           |
| Riyadh-3036074                                           | NEG                                   | POS            | NEG            | POS                              | POS                              | POS                             | NEG                                           |
| Riyadh-3053099                                           | NEG                                   | POS            | NEG            | POS                              | POS                              | POS                             | NEG                                           |
| Riyadh-3055366                                           | NEG                                   | POS            | NEG            | POS                              | POS                              | POS                             | NEG                                           |
| Riyadh-3082712                                           | NEG                                   | POS            | NEG            | POS                              | POS                              | POS                             | NEG                                           |
| Riyadh-3087502                                           | NEG                                   | POS            | NEG            | POS                              | POS                              | POS                             | NEG                                           |
| Riyadh-6                                                 | NEG                                   | POS            | NEG            | POS                              | POS                              | POS                             | NEG                                           |
| Riyadh-7                                                 | NEG                                   | POS            | NEG            | POS                              | POS                              | POS                             | NEG                                           |
| Riyadh-8                                                 | NEG                                   | POS            | NEG            | POS                              | POS                              | POS                             | NEG                                           |
| <b>CC30-MRSA-IV [PVL+], Southwest Pacific Clone</b>      |                                       |                |                |                                  |                                  |                                 |                                               |
| Riyadh-10                                                | NEG                                   | NEG            | POS            | POS                              | POS                              | POS                             | NEG                                           |
| Riyadh_IC_123                                            | NEG                                   | NEG            | POS            | POS                              | POS                              | POS                             | NEG                                           |
| Riyadh-3080713                                           | NEG                                   | NEG            | POS            | POS                              | POS                              | POS                             | NEG                                           |
| Riyadh-2803856                                           | NEG                                   | NEG            | POS            | POS                              | POS                              | POS                             | NEG                                           |
| Riyadh-2817276-1                                         | NEG                                   | NEG            | POS            | POS                              | POS                              | POS                             | NEG                                           |
| Riyadh-2817571-2                                         | NEG                                   | NEG            | POS            | POS                              | POS                              | POS                             | NEG                                           |
| Riyadh-3033868                                           | NEG                                   | NEG            | POS            | POS                              | POS                              | POS                             | NEG                                           |
| Riyadh-2550108                                           | NEG                                   | NEG            | POS            | POS                              | POS                              | POS                             | NEG                                           |
| Riyadh-3095056-2                                         | NEG                                   | NEG            | POS            | POS                              | POS                              | POS                             | NEG                                           |
| Riyadh-2819899                                           | NEG                                   | NEG            | POS            | POS                              | POS                              | POS                             | NEG                                           |
| Riyadh-2821805                                           | NEG                                   | NEG            | POS            | POS                              | POS                              | POS                             | NEG                                           |
| Riyadh-3013928                                           | NEG                                   | NEG            | POS            | POS                              | POS                              | POS                             | NEG                                           |
| Riyadh-3029402                                           | NEG                                   | NEG            | POS            | POS                              | POS                              | POS                             | NEG                                           |
| <b>CC45/agr IV-MRSA-IV, WA MRSA-23</b>                   |                                       |                |                |                                  |                                  |                                 |                                               |
| Riyadh-3081378-1                                         | NEG                                   | NEG            | POS            | POS                              | POS                              | POS                             | NEG                                           |
| <b>CC80-MRSA-IV</b>                                      |                                       |                |                |                                  |                                  |                                 |                                               |
| Riyadh-3107635                                           | NEG                                   | NEG            | POS            | POS                              | POS                              | POS                             | NEG                                           |
| Riyadh-2987458                                           | NEG                                   | NEG            | POS            | POS                              | POS                              | POS                             | NEG                                           |
| <b>CC80-MRSA-IV [PVL+], European caMRSA Clone</b>        |                                       |                |                |                                  |                                  |                                 |                                               |
| Riyadh-2988048                                           | NEG                                   | NEG            | POS            | POS                              | POS                              | POS                             | NEG                                           |
| Riyadh-2990585-2                                         | NEG                                   | NEG            | POS            | POS                              | POS                              | POS                             | NEG                                           |
| Riyadh-2990585-1                                         | NEG                                   | NEG            | POS            | POS                              | POS                              | POS                             | NEG                                           |
| Riyadh-2826033                                           | NEG                                   | NEG            | POS            | POS                              | POS                              | POS                             | NEG                                           |
| Riyadh-1601562                                           | NEG                                   | NEG            | POS            | POS                              | POS                              | POS                             | NEG                                           |
| Riyadh-2569940                                           | NEG                                   | NEG            | POS            | POS                              | POS                              | POS                             | NEG                                           |
| Riyadh-2571692                                           | NEG                                   | NEG            | POS            | POS                              | POS                              | POS                             | NEG                                           |
| Riyadh-2763029                                           | NEG                                   | NEG            | POS            | POS                              | POS                              | POS                             | NEG                                           |
| Riyadh-2767090                                           | NEG                                   | NEG            | POS            | POS                              | POS                              | POS                             | NEG                                           |
| Riyadh-2775130                                           | NEG                                   | NEG            | POS            | POS                              | POS                              | POS                             | NEG                                           |
| Riyadh-2778256                                           | NEG                                   | NEG            | POS            | POS                              | POS                              | POS                             | NEG                                           |
| Riyadh-2817505                                           | NEG                                   | NEG            | POS            | POS                              | POS                              | POS                             | NEG                                           |
| Riyadh-3024912                                           | NEG                                   | NEG            | POS            | POS                              | POS                              | POS                             | NEG                                           |
| Riyadh-2788690                                           | NEG                                   | NEG            | POS            | POS                              | POS                              | POS                             | NEG                                           |
| Riyadh-3292034                                           | NEG                                   | NEG            | POS            | POS                              | POS                              | POS                             | NEG                                           |
| Riyadh-3                                                 | NEG                                   | NEG            | POS            | POS                              | POS                              | POS                             | NEG                                           |
| Riyadh-5                                                 | NEG                                   | NEG            | POS            | POS                              | POS                              | POS                             | NEG                                           |
| Riyadh-2553167                                           | NEG                                   | NEG            | POS            | POS                              | POS                              | POS                             | NEG                                           |
| Riyadh-3002592                                           | NEG                                   | NEG            | POS            | POS                              | POS                              | POS                             | NEG                                           |
| <b>CC88-MRSA-IV [PVL+]</b>                               |                                       |                |                |                                  |                                  |                                 |                                               |
| Riyadh-2736996                                           | AMB                                   | NEG            | POS            | POS                              | POS                              | POS                             | NEG                                           |
| Riyadh-2942396                                           | NEG                                   | NEG            | POS            | POS                              | POS                              | POS                             | NEG                                           |
| Riyadh-3105391                                           | NEG                                   | NEG            | POS            | POS                              | POS                              | POS                             | NEG                                           |
| <b>CC97-MRSA-V</b>                                       |                                       |                |                |                                  |                                  |                                 |                                               |
| Riyadh-0297622                                           | NEG                                   | POS            | NEG            | POS                              | POS                              | POS                             | NEG                                           |
| Riyadh-3025471                                           | NEG                                   | POS            | NEG            | POS                              | POS                              | POS                             | NEG                                           |

|                                                          | ADHAESION FACTORS / GENES ENCODING MICROBIAL SURFACE COMPONENTS RECOGNIZING ADHESIVE MATRIX MOLECULES (MSCRAMM GENES) |            |               |               |           |            |           |                   |            |                 |               |                  |
|----------------------------------------------------------|-----------------------------------------------------------------------------------------------------------------------|------------|---------------|---------------|-----------|------------|-----------|-------------------|------------|-----------------|---------------|------------------|
|                                                          | bbp (total)                                                                                                           | bbp (cons) | bbp(COL+M W2) | bbp(MRSA25 2) | bbp(Mu50) | bbp(RF122) | bbp(ST45) | cfa (total)       | cfa (cons) | cfa (COL+RF122) | cfa (MRSA252) | cfa (Mu50+MuW 2) |
|                                                          | bone sialoprotein-binding protein                                                                                     |            |               |               |           |            |           | clumping factor A |            |                 |               |                  |
| <b>CC1-MRSA-IV&amp;SCCFus, WA MRSA-1/45</b>              |                                                                                                                       |            |               |               |           |            |           |                   |            |                 |               |                  |
| Riyadh-3108609                                           | POS                                                                                                                   | POS        | POS           | NEG           | AMB       | NEG        | NEG       | POS               | POS        | NEG             | NEG           | POS              |
| Riyadh-2913235                                           | POS                                                                                                                   | POS        | AMB           | NEG           | POS       | NEG        | AMB       | POS               | POS        | NEG             | NEG           | POS              |
| <b>CC1/ST772-MRSA-V [PVL+], "Bengal Bay Clone/WA 1"</b>  |                                                                                                                       |            |               |               |           |            |           |                   |            |                 |               |                  |
| Riyadh-2819026                                           | POS                                                                                                                   | POS        | AMB           | NEG           | POS       | NEG        | AMB       | POS               | POS        | NEG             | NEG           | POS              |
| <b>CC5-MRSA-IV, Paediatric clone</b>                     |                                                                                                                       |            |               |               |           |            |           |                   |            |                 |               |                  |
| Riyadh-2915327-1                                         | POS                                                                                                                   | POS        | NEG           | NEG           | POS       | NEG        | NEG       | POS               | POS        | NEG             | NEG           | POS              |
| Riyadh-2915327-2                                         | POS                                                                                                                   | POS        | NEG           | NEG           | POS       | NEG        | NEG       | POS               | POS        | NEG             | NEG           | POS              |
| Riyadh-2                                                 | POS                                                                                                                   | POS        | NEG           | NEG           | POS       | NEG        | NEG       | POS               | POS        | NEG             | NEG           | POS              |
| <b>CC5-MRSA-IV [PVL+], Paediatric clone</b>              |                                                                                                                       |            |               |               |           |            |           |                   |            |                 |               |                  |
| Riyadh-2986666                                           | POS                                                                                                                   | POS        | AMB           | NEG           | POS       | NEG        | AMB       | POS               | POS        | NEG             | NEG           | POS              |
| Riyadh-2913235                                           | POS                                                                                                                   | POS        | AMB           | NEG           | POS       | NEG        | AMB       | POS               | POS        | NEG             | NEG           | POS              |
| <b>CC5-MRSA-IVvar, "Maltese Clone"</b>                   |                                                                                                                       |            |               |               |           |            |           |                   |            |                 |               |                  |
| Riyadh-2983654                                           | POS                                                                                                                   | POS        | AMB           | NEG           | POS       | NEG        | AMB       | POS               | POS        | NEG             | NEG           | POS              |
| Riyadh-4                                                 | POS                                                                                                                   | POS        | NEG           | NEG           | POS       | NEG        | NEG       | POS               | POS        | NEG             | NEG           | POS              |
| Riyadh-2790233                                           | POS                                                                                                                   | POS        | AMB           | NEG           | POS       | NEG        | NEG       | POS               | POS        | NEG             | NEG           | POS              |
| <b>CC5-MRSA-V</b>                                        |                                                                                                                       |            |               |               |           |            |           |                   |            |                 |               |                  |
| Riyadh-2568944                                           | POS                                                                                                                   | POS        | NEG           | NEG           | POS       | NEG        | NEG       | POS               | POS        | NEG             | NEG           | POS              |
| <b>CC6-MRSA-IV, WA MRSA-51/66</b>                        |                                                                                                                       |            |               |               |           |            |           |                   |            |                 |               |                  |
| Riyadh-2566168                                           | POS                                                                                                                   | POS        | POS           | NEG           | NEG       | NEG        | NEG       | POS               | POS        | NEG             | NEG           | POS              |
| Riyadh-2824507                                           | POS                                                                                                                   | POS        | POS           | NEG           | NEG       | NEG        | NEG       | POS               | POS        | NEG             | NEG           | POS              |
| Riyadh-2990831                                           | POS                                                                                                                   | POS        | POS           | NEG           | AMB       | NEG        | NEG       | POS               | POS        | NEG             | NEG           | POS              |
| <b>CC9/ST239-MRSA-III, Vienna/Hungarian/Brazilian Cl</b> |                                                                                                                       |            |               |               |           |            |           |                   |            |                 |               |                  |
| Riyadh-5                                                 | POS                                                                                                                   | POS        | POS           | NEG           | AMB       | NEG        | NEG       | POS               | POS        | POS             | AMB           | AMB              |
| Riyadh-3028763                                           | POS                                                                                                                   | POS        | POS           | NEG           | AMB       | NEG        | AMB       | POS               | POS        | AMB             | AMB           | POS              |
| Riyadh-2817437                                           | POS                                                                                                                   | POS        | POS           | NEG           | AMB       | NEG        | NEG       | POS               | POS        | AMB             | AMB           | POS              |
| Riyadh-2793706                                           | POS                                                                                                                   | POS        | POS           | NEG           | NEG       | NEG        | NEG       | POS               | POS        | AMB             | AMB           | POS              |
| Riyadh-2818797                                           | POS                                                                                                                   | POS        | POS           | NEG           | AMB       | NEG        | AMB       | POS               | POS        | POS             | AMB           | AMB              |
| Riyadh-2822825                                           | POS                                                                                                                   | POS        | POS           | NEG           | AMB       | NEG        | AMB       | POS               | POS        | POS             | AMB           | AMB              |
| Riyadh-2888905                                           | POS                                                                                                                   | POS        | POS           | AMB           | AMB       | NEG        | AMB       | POS               | POS        | AMB             | AMB           | POS              |
| Riyadh-2888915                                           | POS                                                                                                                   | POS        | POS           | NEG           | AMB       | NEG        | AMB       | POS               | POS        | POS             | AMB           | AMB              |
| Riyadh-2567782                                           | POS                                                                                                                   | POS        | POS           | NEG           | NEG       | NEG        | NEG       | POS               | POS        | POS             | AMB           | AMB              |
| Riyadh-2891670                                           | POS                                                                                                                   | POS        | POS           | NEG           | AMB       | NEG        | AMB       | POS               | POS        | POS             | AMB           | AMB              |
| Riyadh-3006920                                           | POS                                                                                                                   | POS        | POS           | NEG           | AMB       | NEG        | NEG       | POS               | POS        | POS             | AMB           | AMB              |
| Riyadh-2817276-1                                         | POS                                                                                                                   | POS        | POS           | NEG           | AMB       | NEG        | NEG       | POS               | POS        | AMB             | AMB           | POS              |
| Riyadh-0295102                                           | POS                                                                                                                   | POS        | POS           | NEG           | AMB       | NEG        | NEG       | POS               | POS        | AMB             | AMB           | POS              |
| Riyadh-2820597                                           | POS                                                                                                                   | POS        | POS           | NEG           | AMB       | NEG        | AMB       | POS               | POS        | POS             | AMB           | AMB              |
| Riyadh-2822088                                           | POS                                                                                                                   | POS        | POS           | NEG           | AMB       | NEG        | NEG       | POS               | POS        | POS             | AMB           | AMB              |
| Riyadh-3010092                                           | POS                                                                                                                   | POS        | POS           | NEG           | NEG       | NEG        | NEG       | POS               | POS        | AMB             | AMB           | POS              |
| Riyadh-3022844                                           | POS                                                                                                                   | POS        | POS           | NEG           | AMB       | NEG        | NEG       | POS               | POS        | AMB             | AMB           | POS              |
| Riyadh-3108214-2                                         | POS                                                                                                                   | POS        | POS           | NEG           | NEG       | NEG        | NEG       | POS               | POS        | POS             | AMB           | AMB              |
| Riyadh-2823926                                           | POS                                                                                                                   | POS        | POS           | NEG           | AMB       | NEG        | NEG       | POS               | POS        | POS             | AMB           | POS              |
| Riyadh-1                                                 | POS                                                                                                                   | POS        | POS           | NEG           | AMB       | NEG        | NEG       | POS               | POS        | POS             | AMB           | AMB              |
| Riyadh-2818388                                           | POS                                                                                                                   | POS        | POS           | NEG           | AMB       | NEG        | AMB       | POS               | POS        | POS             | AMB           | AMB              |
| Riyadh-3112315                                           | POS                                                                                                                   | POS        | POS           | NEG           | AMB       | NEG        | AMB       | NEG               | NEG        | NEG             | NEG           | NEG              |
| <b>CC9/ST834-MRSA-(atypical SCCmec)</b>                  |                                                                                                                       |            |               |               |           |            |           |                   |            |                 |               |                  |
| Riyadh-3103521                                           | POS                                                                                                                   | POS        | POS           | NEG           | NEG       | NEG        | AMB       | POS               | POS        | POS             | AMB           | AMB              |
| <b>CC22-MRSA-IV, Barnim/UK-EMRSA-15</b>                  |                                                                                                                       |            |               |               |           |            |           |                   |            |                 |               |                  |
| Riyadh-2553350                                           | POS                                                                                                                   | POS        | NEG           | NEG           | NEG       | NEG        | NEG       | POS               | POS        | NEG             | NEG           | POS              |
| Riyadh-2571758                                           | POS                                                                                                                   | POS        | NEG           | NEG           | POS       | NEG        | NEG       | POS               | POS        | NEG             | NEG           | POS              |
| Riyadh-3029203                                           | POS                                                                                                                   | POS        | NEG           | NEG           | POS       | NEG        | AMB       | POS               | POS        | NEG             | NEG           | POS              |
| Riyadh-3039785                                           | POS                                                                                                                   | POS        | NEG           | NEG           | POS       | NEG        | NEG       | POS               | POS        | NEG             | NEG           | POS              |
| Riyadh-3105594                                           | POS                                                                                                                   | POS        | NEG           | NEG           | POS       | NEG        | NEG       | POS               | POS        | NEG             | NEG           | POS              |
| Riyadh_IC_204-2                                          | POS                                                                                                                   | POS        | NEG           | NEG           | POS       | NEG        | NEG       | POS               | POS        | NEG             | NEG           | POS              |
| Riyadh-3003974                                           | POS                                                                                                                   | POS        | NEG           | NEG           | AMB       | NEG        | NEG       | POS               | POS        | NEG             | NEG           | POS              |
| Riyadh_IC_067                                            | POS                                                                                                                   | POS        | NEG           | NEG           | POS       | NEG        | NEG       | POS               | POS        | NEG             | NEG           | POS              |
| Riyadh-2988627                                           | POS                                                                                                                   | POS        | NEG           | NEG           | NEG       | NEG        | NEG       | POS               | POS        | NEG             | NEG           | POS              |
| Riyadh-3112581                                           | POS                                                                                                                   | POS        | NEG           | NEG           | NEG       | NEG        | NEG       | POS               | POS        | NEG             | NEG           | POS              |
| <b>CC22-MRSA-IV [PVL+]</b>                               |                                                                                                                       |            |               |               |           |            |           |                   |            |                 |               |                  |
| Riyadh-2781995-1                                         | POS                                                                                                                   | POS        | NEG           | NEG           | NEG       | NEG        | NEG       | POS               | POS        | NEG             | NEG           | POS              |
| Riyadh-3103432                                           | POS                                                                                                                   | POS        | NEG           | NEG           | POS       | NEG        | NEG       | POS               | POS        | NEG             | NEG           | POS              |
| Riyadh-3026502                                           | POS                                                                                                                   | POS        | NEG           | NEG           | NEG       | NEG        | NEG       | POS               | POS        | NEG             | NEG           | POS              |
| Riyadh-3081378-2                                         | POS                                                                                                                   | POS        | NEG           | NEG           | NEG       | NEG        | NEG       | POS               | POS        | NEG             | NEG           | POS              |
| Riyadh_IC_185                                            | POS                                                                                                                   | POS        | NEG           | NEG           | POS       | NEG        | NEG       | POS               | POS        | NEG             | NEG           | POS              |
| Riyadh_IC_204-1                                          | POS                                                                                                                   | POS        | NEG           | NEG           | POS       | NEG        | NEG       | POS               | POS        | NEG             | NEG           | POS              |
| Riyadh-359371                                            | POS                                                                                                                   | POS        | NEG           | NEG           | POS       | NEG        | NEG       | POS               | POS        | NEG             | NEG           | POS              |
| Riyadh-2753975                                           | POS                                                                                                                   | POS        | NEG           | NEG           | POS       | NEG        | NEG       | POS               | POS        | NEG             | NEG           | POS              |
| Riyadh-2775605                                           | POS                                                                                                                   | POS        | NEG           | NEG           | NEG       | NEG        | NEG       | POS               | POS        | NEG             | NEG           | POS              |
| Riyadh-2781996-2                                         | POS                                                                                                                   | POS        | NEG           | NEG           | NEG       | NEG        | NEG       | POS               | POS        | NEG             | NEG           | POS              |
| Riyadh-2763783-2                                         | POS                                                                                                                   | POS        | NEG           | NEG           | AMB       | NEG        | NEG       | POS               | POS        | NEG             | NEG           | POS              |
| Riyadh-2765601                                           | POS                                                                                                                   | POS        | NEG           | NEG           | POS       | NEG        | NEG       | POS               | POS        | NEG             | NEG           | POS              |
| Riyadh-3036074                                           | POS                                                                                                                   | POS        | NEG           | NEG           | POS       | NEG        | AMB       | POS               | POS        | NEG             | NEG           | POS              |
| Riyadh-3053099                                           | POS                                                                                                                   | POS        | NEG           | NEG           | POS       | NEG        | NEG       | POS               | POS        | NEG             | NEG           | POS              |
| Riyadh-3055366                                           | POS                                                                                                                   | POS        | NEG           | NEG           | POS       | NEG        | NEG       | POS               | POS        | NEG             | NEG           | POS              |
| Riyadh-3082712                                           | POS                                                                                                                   | POS        | NEG           | NEG           | POS       | NEG        | NEG       | POS               | POS        | NEG             | NEG           | POS              |
| Riyadh-3087502                                           | POS                                                                                                                   | POS        | NEG           | NEG           | NEG       | NEG        | NEG       | POS               | POS        | NEG             | NEG           | POS              |
| Riyadh-6                                                 | POS                                                                                                                   | POS        | NEG           | NEG           | NEG       | NEG        | NEG       | POS               | POS        | NEG             | NEG           | POS              |
| Riyadh-7                                                 | POS                                                                                                                   | POS        | NEG           | NEG           | NEG       | NEG        | NEG       | POS               | POS        | NEG             | NEG           | POS              |
| Riyadh-8                                                 | POS                                                                                                                   | POS        | NEG           | NEG           | NEG       | NEG        | NEG       | POS               | POS        | NEG             | NEG           | POS              |
| <b>CC30-MRSA-IV [PVL+], Southwest Pacific Clone</b>      |                                                                                                                       |            |               |               |           |            |           |                   |            |                 |               |                  |
| Riyadh-10                                                | POS                                                                                                                   | POS        | NEG           | POS           | NEG       | NEG        | NEG       | POS               | POS        | POS             | AMB           | NEG              |
| Riyadh_IC_123                                            | POS                                                                                                                   | POS        | AMB           | POS           | NEG       | NEG        | NEG       | POS               | POS        | POS             | AMB           | AMB              |
| Riyadh-3080713                                           | POS                                                                                                                   | POS        | POS           | POS           | NEG       | NEG        | NEG       | POS               | POS        | POS             | AMB           | POS              |
| Riyadh-2803856                                           | POS                                                                                                                   | POS        | AMB           | POS           | NEG       | NEG        | NEG       | POS               | POS        | POS             | AMB           | NEG              |
| Riyadh-2817276-1                                         | POS                                                                                                                   | POS        | AMB           | POS           | NEG       | NEG        | AMB       | POS               | POS        | POS             | AMB           | AMB              |
| Riyadh-2817571-2                                         | NEG                                                                                                                   | NEG        | NEG           | NEG           | NEG       | NEG        | NEG       | POS               | POS        | POS             | AMB           | AMB              |
| Riyadh-3033868                                           | POS                                                                                                                   | POS        | NEG           | POS           | NEG       | NEG        | NEG       | POS               | POS        | POS             | AMB           | NEG              |
| Riyadh-2550106                                           | POS                                                                                                                   | POS        | NEG           | POS           | NEG       | NEG        | NEG       | POS               | POS        | POS             | AMB           | NEG              |
| Riyadh-3095056-2                                         | POS                                                                                                                   | POS        | NEG           | NEG           | NEG       | NEG        | NEG       | POS               | POS        | POS             | AMB           | NEG              |
| Riyadh-2819899                                           | POS                                                                                                                   | POS        | NEG           | POS           | NEG       | NEG        | NEG       | POS               | POS        | POS             | AMB           | NEG              |
| Riyadh-2821805                                           | POS                                                                                                                   | POS        | NEG           | POS           | NEG       | NEG        | NEG       | POS               | POS        | POS             | AMB           | NEG              |
| Riyadh-3013928                                           | POS                                                                                                                   | POS        | AMB           | POS           | NEG       | NEG        | NEG       | POS               | POS        | POS             | AMB           | NEG              |
| Riyadh-3029402                                           | POS                                                                                                                   | POS        | AMB           | POS           | NEG       | NEG        | AMB       | POS               | POS        | POS             | AMB           | NEG              |
| <b>CC45/agr IV-MRSA-IV, WA MRSA-23</b>                   |                                                                                                                       |            |               |               |           |            |           |                   |            |                 |               |                  |
| Riyadh-3081378-1                                         | POS                                                                                                                   | POS        | NEG           | NEG           | NEG       | NEG        | POS       | POS               | POS        | NEG             | NEG           | POS              |
| <b>CC80-MRSA-IV</b>                                      |                                                                                                                       |            |               |               |           |            |           |                   |            |                 |               |                  |
| Riyadh-3107635                                           | POS                                                                                                                   | POS        | NEG           | NEG           | POS       | NEG        | NEG       | POS               | POS        | NEG             | NEG           | POS              |
| Riyadh-2987458                                           | POS                                                                                                                   | POS        | AMB           | NEG           | POS       | NEG        | AMB       | POS               | POS        | NEG             | NEG           | POS              |
| <b>CC80-MRSA-IV [PVL+], European caMRSA Clone</b>        |                                                                                                                       |            |               |               |           |            |           |                   |            |                 |               |                  |
| Riyadh-2988048                                           | POS                                                                                                                   | POS        | NEG           | NEG           | POS       | NEG        | NEG       | POS               | POS        | NEG             | NEG           | POS              |
| Riyadh-2990585-2                                         | POS                                                                                                                   | POS        | NEG           | NEG           | POS       | NEG        | NEG       | POS               | POS        | NEG             | NEG           | POS              |
| Riyadh-2990585-1                                         | POS                                                                                                                   | POS        | AMB           | NEG           | POS       | NEG        | NEG       | POS               | POS        | NEG             | NEG           | POS              |
| Riyadh-2826033                                           | POS                                                                                                                   | POS        | NEG           | NEG           | NEG       | NEG        | NEG       | POS               | POS        | NEG             | NEG           | POS              |
| Riyadh-1601562                                           | NEG                                                                                                                   | NEG        | NEG           | NEG           | NEG       | NEG        | NEG       | POS               | POS        | POS             | NEG           | POS              |
| Riyadh-2569940                                           | POS                                                                                                                   | POS        | AMB           | NEG           | POS       | NEG        | AMB       | POS               | POS        | NEG             | NEG           | POS              |
| Riyadh-2571692                                           | POS                                                                                                                   | POS        | AMB           | NEG           | POS       | NEG        | AMB       | POS               | POS        | NEG             | NEG           | POS              |
| Riyadh-2763029                                           | POS                                                                                                                   | POS        | AMB           | NEG           | POS       | NEG        | AMB       | POS               | POS        | NEG             | NEG           | POS              |
| Riyadh-2767090                                           | POS                                                                                                                   | POS        | NEG           | NEG           | POS       | NEG        | NEG       | POS               | POS        | NEG             | NEG           | POS              |
| Riyadh-2775130                                           | POS                                                                                                                   | POS        | NEG           | NEG           | POS       | NEG        | NEG       | POS               | POS        | NEG             | NEG           | POS              |
| Riyadh-2778256                                           | POS                                                                                                                   | POS        | NEG           | NEG           | POS       | NEG        | NEG       | POS               | POS        | NEG             | NEG           | POS              |
| Riyadh-2817505                                           | POS                                                                                                                   | POS        | AMB           | NEG           | POS       | NEG        | AMB       | POS               | POS        | NEG             | NEG           | POS              |
| Riyadh-3024912                                           | POS                                                                                                                   | POS        | NEG           | NEG           | POS       | NEG        | NEG       | POS               | POS        | NEG             | NEG           | POS              |
| Riyadh-2786990                                           | POS                                                                                                                   | POS        | NEG           | NEG           | POS       | NEG        | NEG       | POS               | POS        | NEG             | NEG           | POS              |
| Riyadh-3292034                                           | POS                                                                                                                   | POS        | AMB           | POS           | NEG       | NEG        | NEG       | POS               | POS        | NEG             | NEG           | POS              |
| Riyadh-3                                                 | POS                                                                                                                   | POS        | NEG           | NEG           | POS       | NEG        | NEG       | POS               | POS        | NEG             | NEG           | POS              |
| Riyadh-5                                                 | POS                                                                                                                   | POS        | NEG           | NEG           | POS       | NEG        | AMB       | POS               | POS        | NEG             | NEG           | POS              |
| Riyadh-2553167                                           | POS                                                                                                                   | POS        | NEG           | NEG           | POS       | NEG        | NEG       | POS               | POS        | NEG             | NEG           | POS              |
| Riyadh-3002592                                           | POS                                                                                                                   | POS        | AMB           | NEG           | POS       | NEG        | NEG       | POS               | POS        | NEG             | NEG           | POS              |
| <b>CC88-MRSA-IV [PVL+]</b>                               |                                                                                                                       |            |               |               |           |            |           |                   |            |                 |               |                  |
| Riyadh-2736996                                           | POS                                                                                                                   | POS        | AMB           | NEG           | POS       | NEG        | AMB       | POS               | POS        | NEG             | NEG           | POS              |
| Riyadh-2942396                                           | POS                                                                                                                   | POS        | AMB           | NEG           | POS       | NEG        | AMB       | POS               | POS        | NEG             | NEG           | POS              |
| Riyadh-3105391                                           | POS                                                                                                                   | POS        | NEG           | NEG           | POS       | NEG        | NEG       | POS               | POS        | NEG             | NEG           | POS              |
| <b>CC97-MRSA-V</b>                                       |                                                                                                                       |            |               |               |           |            |           |                   |            |                 |               |                  |
| Riyadh-0297622                                           | POS                                                                                                                   | POS        | AMB           | NEG           | POS       | NEG        | NEG       | POS               | POS        | AMB             | AMB           | AMB              |
| Riyadh-3025471                                           | POS                                                                                                                   | POS        | NEG           | NEG           | POS       | NEG        | NEG       | POS               | POS        |                 |               |                  |

|                                                          | ADHAESION FACTORS / GENES ENCODING MICROBIAL SURFACE COMPONENTS RECOGNIZING ADHESIVE MATRIX MOLECULES (MSCRAMM GENES) |             |                 |            |              |                          |                                                  |                                      |                |                |                |            |     |
|----------------------------------------------------------|-----------------------------------------------------------------------------------------------------------------------|-------------|-----------------|------------|--------------|--------------------------|--------------------------------------------------|--------------------------------------|----------------|----------------|----------------|------------|-----|
|                                                          | clfB (total)                                                                                                          | clfB (cons) | clfB (COL+Mu50) | clfB (MW2) | clfB (RF122) | cna                      | ebh (cons)                                       | ebpS (total)                         | ebpS_probe 612 | ebpS_probe 614 | ebpS (01-1111) | ebpS (COL) | eno |
|                                                          | clumping factor B                                                                                                     |             |                 |            |              | collagen-binding adhesin | cell wall associated fibronectin-binding protein | cell surface elastin binding protein |                |                |                | enolase    |     |
| <b>CC1-MRSA-IV&amp;SCCFus, WA MRSA-1/45</b>              | POS                                                                                                                   | POS         | NEG             | POS        | AMB          | POS                      | POS                                              | POS                                  | POS            | POS            | NEG            | NEG        | POS |
| Riyadh-3108609                                           | POS                                                                                                                   | POS         | NEG             | POS        | AMB          | POS                      | POS                                              | POS                                  | POS            | POS            | NEG            | NEG        | POS |
| <b>CC1/ST772-MRSA-V [PVL+], "Bengal Bay Clone/WA I"</b>  | POS                                                                                                                   | POS         | NEG             | NEG        | POS          | POS                      | POS                                              | POS                                  | POS            | POS            | NEG            | NEG        | POS |
| Riyadh-2819026                                           | POS                                                                                                                   | POS         | NEG             | NEG        | POS          | POS                      | POS                                              | POS                                  | POS            | POS            | NEG            | NEG        | POS |
| <b>CC5-MRSA-IV, Paediatric clone</b>                     | POS                                                                                                                   | POS         | POS             | NEG        | NEG          | NEG                      | POS                                              | POS                                  | POS            | POS            | NEG            | NEG        | POS |
| Riyadh-2915327-1                                         | POS                                                                                                                   | POS         | POS             | NEG        | NEG          | NEG                      | POS                                              | POS                                  | POS            | POS            | NEG            | NEG        | POS |
| Riyadh-2915327-2                                         | POS                                                                                                                   | POS         | POS             | NEG        | NEG          | NEG                      | POS                                              | POS                                  | POS            | POS            | NEG            | NEG        | POS |
| Riyadh-2                                                 | POS                                                                                                                   | POS         | POS             | NEG        | NEG          | NEG                      | POS                                              | POS                                  | POS            | POS            | NEG            | NEG        | POS |
| <b>CC5-MRSA-IV [PVL+], Paediatric clone</b>              | POS                                                                                                                   | POS         | POS             | NEG        | NEG          | NEG                      | POS                                              | POS                                  | POS            | POS            | NEG            | NEG        | POS |
| Riyadh-2986666                                           | POS                                                                                                                   | POS         | POS             | NEG        | NEG          | NEG                      | POS                                              | POS                                  | POS            | POS            | NEG            | NEG        | POS |
| Riyadh-2913335                                           | POS                                                                                                                   | POS         | POS             | NEG        | NEG          | NEG                      | POS                                              | POS                                  | POS            | POS            | NEG            | NEG        | POS |
| <b>CC5-MRSA-IVvar, "Maltese Clone"</b>                   | POS                                                                                                                   | POS         | POS             | NEG        | NEG          | NEG                      | POS                                              | POS                                  | POS            | POS            | NEG            | NEG        | POS |
| Riyadh-2983654                                           | POS                                                                                                                   | POS         | POS             | NEG        | NEG          | NEG                      | POS                                              | POS                                  | POS            | POS            | NEG            | NEG        | POS |
| Riyadh-4                                                 | POS                                                                                                                   | POS         | POS             | NEG        | NEG          | NEG                      | POS                                              | POS                                  | POS            | POS            | NEG            | NEG        | POS |
| Riyadh-2790233                                           | POS                                                                                                                   | POS         | POS             | NEG        | NEG          | NEG                      | POS                                              | POS                                  | POS            | POS            | NEG            | NEG        | POS |
| <b>CC5-MRSA-V</b>                                        | POS                                                                                                                   | POS         | POS             | NEG        | NEG          | NEG                      | POS                                              | POS                                  | POS            | POS            | NEG            | NEG        | POS |
| Riyadh-2568944                                           | POS                                                                                                                   | POS         | POS             | NEG        | NEG          | NEG                      | POS                                              | POS                                  | POS            | POS            | NEG            | NEG        | POS |
| <b>CC6-MRSA-IV, WA MRSA-51/66</b>                        | POS                                                                                                                   | POS         | NEG             | NEG        | POS          | POS                      | POS                                              | POS                                  | POS            | POS            | NEG            | NEG        | POS |
| Riyadh-2556168                                           | POS                                                                                                                   | POS         | NEG             | NEG        | POS          | POS                      | POS                                              | POS                                  | POS            | POS            | NEG            | NEG        | POS |
| Riyadh-2824507                                           | POS                                                                                                                   | POS         | NEG             | NEG        | POS          | POS                      | POS                                              | POS                                  | POS            | POS            | NEG            | NEG        | POS |
| Riyadh-2990831                                           | POS                                                                                                                   | POS         | AMB             | NEG        | POS          | POS                      | POS                                              | POS                                  | POS            | POS            | NEG            | NEG        | POS |
| <b>CC9/ST239-MRSA-III, Vienna/Hungarian/Brazilian Cl</b> | POS                                                                                                                   | POS         | NEG             | NEG        | POS          | POS                      | POS                                              | POS                                  | POS            | POS            | NEG            | NEG        | POS |
| Riyadh-5                                                 | POS                                                                                                                   | POS         | NEG             | NEG        | POS          | POS                      | POS                                              | POS                                  | POS            | POS            | NEG            | NEG        | POS |
| Riyadh-3028763                                           | POS                                                                                                                   | POS         | NEG             | NEG        | POS          | POS                      | POS                                              | POS                                  | POS            | POS            | NEG            | NEG        | POS |
| Riyadh-2817437                                           | POS                                                                                                                   | POS         | NEG             | NEG        | POS          | POS                      | POS                                              | POS                                  | POS            | POS            | NEG            | NEG        | POS |
| Riyadh-2793706                                           | POS                                                                                                                   | POS         | NEG             | NEG        | POS          | POS                      | POS                                              | POS                                  | POS            | POS            | NEG            | NEG        | POS |
| Riyadh-2818797                                           | POS                                                                                                                   | POS         | NEG             | NEG        | POS          | POS                      | POS                                              | POS                                  | POS            | POS            | NEG            | NEG        | POS |
| Riyadh-2822825                                           | POS                                                                                                                   | POS         | AMB             | NEG        | POS          | POS                      | POS                                              | POS                                  | POS            | POS            | NEG            | NEG        | POS |
| Riyadh-2888905                                           | POS                                                                                                                   | POS         | NEG             | NEG        | POS          | POS                      | POS                                              | POS                                  | POS            | POS            | NEG            | NEG        | POS |
| Riyadh-2888915                                           | POS                                                                                                                   | POS         | AMB             | NEG        | POS          | POS                      | POS                                              | POS                                  | POS            | POS            | NEG            | NEG        | POS |
| Riyadh-2567782                                           | POS                                                                                                                   | POS         | NEG             | NEG        | POS          | POS                      | NEG                                              | POS                                  | POS            | POS            | NEG            | NEG        | POS |
| Riyadh-2891670                                           | POS                                                                                                                   | POS         | NEG             | NEG        | POS          | POS                      | POS                                              | POS                                  | POS            | POS            | NEG            | NEG        | POS |
| Riyadh-3006920                                           | POS                                                                                                                   | POS         | NEG             | NEG        | POS          | POS                      | POS                                              | POS                                  | POS            | POS            | NEG            | NEG        | POS |
| Riyadh-2817276-1                                         | POS                                                                                                                   | POS         | NEG             | NEG        | POS          | POS                      | POS                                              | POS                                  | POS            | POS            | NEG            | NEG        | POS |
| Riyadh-0295102                                           | POS                                                                                                                   | POS         | NEG             | NEG        | POS          | POS                      | POS                                              | POS                                  | POS            | POS            | NEG            | NEG        | POS |
| Riyadh-2820597                                           | POS                                                                                                                   | POS         | AMB             | NEG        | POS          | POS                      | POS                                              | POS                                  | POS            | POS            | NEG            | NEG        | POS |
| Riyadh-2822088                                           | POS                                                                                                                   | POS         | AMB             | NEG        | POS          | POS                      | POS                                              | POS                                  | POS            | POS            | NEG            | NEG        | POS |
| Riyadh-3010092                                           | POS                                                                                                                   | POS         | NEG             | NEG        | POS          | POS                      | POS                                              | POS                                  | POS            | POS            | NEG            | NEG        | POS |
| Riyadh-3022844                                           | POS                                                                                                                   | POS         | NEG             | NEG        | POS          | POS                      | POS                                              | POS                                  | POS            | POS            | NEG            | NEG        | POS |
| Riyadh-3108214-2                                         | POS                                                                                                                   | POS         | NEG             | NEG        | POS          | POS                      | POS                                              | POS                                  | POS            | POS            | NEG            | NEG        | POS |
| Riyadh-2823926                                           | POS                                                                                                                   | POS         | NEG             | NEG        | POS          | POS                      | POS                                              | POS                                  | POS            | POS            | NEG            | NEG        | POS |
| Riyadh-1                                                 | POS                                                                                                                   | POS         | NEG             | NEG        | POS          | POS                      | POS                                              | POS                                  | POS            | POS            | NEG            | NEG        | POS |
| Riyadh-2818388                                           | POS                                                                                                                   | POS         | NEG             | NEG        | POS          | POS                      | POS                                              | POS                                  | POS            | POS            | NEG            | NEG        | POS |
| Riyadh-3113315                                           | POS                                                                                                                   | POS         | NEG             | NEG        | POS          | POS                      | POS                                              | POS                                  | POS            | POS            | NEG            | NEG        | POS |
| <b>CC9/ST834-MRSA-(atypical SCCmec)</b>                  | POS                                                                                                                   | POS         | NEG             | NEG        | POS          | NEG                      | POS                                              | POS                                  | POS            | POS            | NEG            | NEG        | POS |
| Riyadh-3103521                                           | POS                                                                                                                   | POS         | NEG             | NEG        | POS          | NEG                      | POS                                              | POS                                  | POS            | POS            | NEG            | NEG        | POS |
| <b>CC22-MRSA-IV, Barnim/UK-EMRSA-15</b>                  | POS                                                                                                                   | POS         | NEG             | NEG        | POS          | POS                      | NEG                                              | POS                                  | POS            | POS            | NEG            | NEG        | POS |
| Riyadh-2553350                                           | POS                                                                                                                   | POS         | NEG             | NEG        | POS          | POS                      | NEG                                              | POS                                  | POS            | POS            | NEG            | NEG        | POS |
| Riyadh-2571758                                           | POS                                                                                                                   | POS         | NEG             | NEG        | POS          | POS                      | NEG                                              | POS                                  | POS            | POS            | NEG            | NEG        | POS |
| Riyadh-3029203                                           | POS                                                                                                                   | POS         | NEG             | NEG        | POS          | POS                      | NEG                                              | POS                                  | POS            | POS            | NEG            | NEG        | POS |
| Riyadh-3039785                                           | POS                                                                                                                   | POS         | NEG             | NEG        | POS          | POS                      | NEG                                              | POS                                  | POS            | POS            | NEG            | NEG        | POS |
| Riyadh-3105594                                           | POS                                                                                                                   | POS         | NEG             | NEG        | POS          | POS                      | NEG                                              | POS                                  | POS            | POS            | NEG            | NEG        | POS |
| Riyadh_IC_204-2                                          | POS                                                                                                                   | POS         | AMB             | NEG        | POS          | POS                      | NEG                                              | POS                                  | POS            | POS            | NEG            | NEG        | POS |
| Riyadh-3003974                                           | POS                                                                                                                   | POS         | NEG             | NEG        | POS          | POS                      | NEG                                              | POS                                  | POS            | POS            | NEG            | NEG        | POS |
| Riyadh_IC_067                                            | POS                                                                                                                   | POS         | NEG             | NEG        | POS          | POS                      | NEG                                              | POS                                  | POS            | POS            | NEG            | NEG        | POS |
| Riyadh-2988627                                           | POS                                                                                                                   | POS         | NEG             | NEG        | POS          | POS                      | NEG                                              | POS                                  | POS            | POS            | NEG            | NEG        | POS |
| Riyadh-3112581                                           | POS                                                                                                                   | POS         | NEG             | NEG        | POS          | POS                      | NEG                                              | POS                                  | POS            | POS            | NEG            | NEG        | POS |
| <b>CC22-MRSA-IV [PVL+]</b>                               | POS                                                                                                                   | POS         | NEG             | NEG        | POS          | POS                      | NEG                                              | POS                                  | POS            | POS            | NEG            | NEG        | POS |
| Riyadh-2781996-1                                         | POS                                                                                                                   | POS         | NEG             | NEG        | POS          | POS                      | NEG                                              | POS                                  | POS            | POS            | NEG            | NEG        | POS |
| Riyadh-3103432                                           | POS                                                                                                                   | POS         | NEG             | NEG        | POS          | POS                      | NEG                                              | POS                                  | POS            | POS            | NEG            | NEG        | POS |
| Riyadh-3026502                                           | POS                                                                                                                   | POS         | NEG             | NEG        | NEG          | POS                      | NEG                                              | POS                                  | POS            | POS            | NEG            | NEG        | POS |
| Riyadh-3081378-2                                         | POS                                                                                                                   | POS         | NEG             | NEG        | POS          | POS                      | NEG                                              | POS                                  | POS            | POS            | NEG            | NEG        | POS |
| Riyadh_IC_185                                            | POS                                                                                                                   | POS         | NEG             | NEG        | POS          | POS                      | NEG                                              | POS                                  | POS            | POS            | NEG            | NEG        | POS |
| Riyadh_IC_204-1                                          | POS                                                                                                                   | POS         | NEG             | NEG        | POS          | POS                      | NEG                                              | POS                                  | POS            | POS            | NEG            | NEG        | POS |
| Riyadh-3159371                                           | POS                                                                                                                   | POS         | NEG             | NEG        | POS          | POS                      | NEG                                              | POS                                  | POS            | POS            | NEG            | NEG        | POS |
| Riyadh-2753975                                           | POS                                                                                                                   | POS         | NEG             | NEG        | POS          | POS                      | NEG                                              | POS                                  | POS            | POS            | NEG            | NEG        | POS |
| Riyadh-2775605                                           | POS                                                                                                                   | POS         | NEG             | NEG        | POS          | POS                      | NEG                                              | POS                                  | POS            | POS            | NEG            | NEG        | POS |
| Riyadh-2781996-2                                         | POS                                                                                                                   | POS         | NEG             | NEG        | POS          | POS                      | NEG                                              | POS                                  | POS            | POS            | NEG            | NEG        | POS |
| Riyadh-2823783-2                                         | POS                                                                                                                   | POS         | NEG             | NEG        | POS          | POS                      | NEG                                              | POS                                  | POS            | POS            | NEG            | NEG        | POS |
| Riyadh-2876501                                           | POS                                                                                                                   | POS         | NEG             | NEG        | POS          | POS                      | NEG                                              | POS                                  | POS            | POS            | NEG            | NEG        | POS |
| Riyadh-3036074                                           | POS                                                                                                                   | POS         | NEG             | NEG        | POS          | POS                      | NEG                                              | POS                                  | POS            | POS            | NEG            | NEG        | POS |
| Riyadh-3053099                                           | POS                                                                                                                   | POS         | NEG             | NEG        | POS          | POS                      | NEG                                              | POS                                  | POS            | POS            | NEG            | NEG        | POS |
| Riyadh-3055366                                           | POS                                                                                                                   | POS         | NEG             | NEG        | POS          | POS                      | NEG                                              | POS                                  | POS            | POS            | NEG            | NEG        | POS |
| Riyadh-3082712                                           | POS                                                                                                                   | POS         | NEG             | NEG        | POS          | POS                      | NEG                                              | POS                                  | POS            | POS            | NEG            | NEG        | POS |
| Riyadh-3087502                                           | POS                                                                                                                   | POS         | NEG             | NEG        | POS          | POS                      | NEG                                              | POS                                  | POS            | POS            | NEG            | NEG        | POS |
| Riyadh-6                                                 | POS                                                                                                                   | POS         | NEG             | NEG        | NEG          | POS                      | NEG                                              | POS                                  | POS            | POS            | NEG            | NEG        | POS |
| Riyadh-7                                                 | POS                                                                                                                   | POS         | NEG             | NEG        | POS          | POS                      | NEG                                              | POS                                  | POS            | POS            | NEG            | NEG        | POS |
| Riyadh-8                                                 | POS                                                                                                                   | POS         | NEG             | NEG        | POS          | POS                      | NEG                                              | POS                                  | POS            | POS            | NEG            | NEG        | POS |
| <b>CC30-MRSA-IV [PVL+], Southwest Pacific Clone</b>      | POS                                                                                                                   | POS         | NEG             | NEG        | POS          | POS                      | POS                                              | POS                                  | POS            | POS            | NEG            | NEG        | POS |
| Riyadh-10                                                | POS                                                                                                                   | POS         | NEG             | NEG        | POS          | POS                      | POS                                              | POS                                  | POS            | POS            | NEG            | NEG        | POS |
| Riyadh_IC_123                                            | POS                                                                                                                   | POS         | NEG             | NEG        | POS          | POS                      | POS                                              | POS                                  | POS            | POS            | NEG            | NEG        | POS |
| Riyadh-3080713                                           | POS                                                                                                                   | POS         | NEG             | NEG        | POS          | POS                      | POS                                              | POS                                  | POS            | POS            | NEG            | NEG        | POS |
| Riyadh-2803856                                           | POS                                                                                                                   | POS         | NEG             | NEG        | POS          | POS                      | POS                                              | POS                                  | POS            | POS            | NEG            | NEG        | POS |
| Riyadh-2817276-1                                         | POS                                                                                                                   | POS         | NEG             | NEG        | POS          | POS                      | POS                                              | POS                                  | POS            | POS            | NEG            | NEG        | POS |
| Riyadh-2817571-2                                         | POS                                                                                                                   | POS         | NEG             | NEG        | POS          | POS                      | POS                                              | POS                                  | POS            | POS            | NEG            | NEG        | POS |
| Riyadh-3033868                                           | POS                                                                                                                   | POS         | NEG             | NEG        | POS          | POS                      | POS                                              | POS                                  | POS            | POS            | NEG            | NEG        | POS |
| Riyadh-2550106                                           | POS                                                                                                                   | POS         | NEG             | NEG        | POS          | POS                      | POS                                              | POS                                  | POS            | POS            | NEG            | NEG        | POS |
| Riyadh-3095056-2                                         | POS                                                                                                                   | POS         | NEG             | NEG        | NEG          | POS                      | POS                                              | POS                                  | POS            | POS            | NEG            | NEG        | POS |
| Riyadh-2819899                                           | POS                                                                                                                   | POS         | NEG             | NEG        | NEG          | POS                      | POS                                              | POS                                  | POS            | POS            | NEG            | NEG        | POS |
| Riyadh-2821805                                           | POS                                                                                                                   | POS         | NEG             | NEG        | NEG          | POS                      | POS                                              | POS                                  | POS            | POS            | NEG            | NEG        | POS |
| Riyadh-3013928                                           | POS                                                                                                                   | POS         | NEG             | NEG        | NEG          | POS                      | POS                                              | POS                                  | POS            | POS            | NEG            | NEG        | POS |
| Riyadh-3029402                                           | POS                                                                                                                   | POS         | NEG             | NEG        | NEG          | POS                      | POS                                              | POS                                  | POS            | POS            | NEG            | NEG        | POS |
| <b>CC45/agr IV-MRSA-IV, WA MRSA-23</b>                   | POS                                                                                                                   | POS         | NEG             | POS        | AMB          | POS                      | POS                                              | POS                                  | NEG            | POS            | POS            | NEG        | POS |
| Riyadh-3081378-1                                         | POS                                                                                                                   | POS         | NEG             | POS        | AMB          | POS                      | POS                                              | POS                                  | NEG            | POS            | POS            | NEG        | POS |
| <b>CC80-MRSA-IV</b>                                      | POS                                                                                                                   | POS         | POS             | NEG        | NEG          | NEG                      | POS                                              | POS                                  | POS            | POS            | NEG            | NEG        | POS |
| Riyadh-3107635                                           | POS                                                                                                                   | POS         | POS             | NEG        | NEG          | NEG                      | POS                                              | POS                                  | POS            | POS            | NEG            | NEG        | POS |
| Riyadh-2987458                                           | POS                                                                                                                   | POS         | POS             | NEG        | NEG          | NEG                      | POS                                              | POS                                  | POS            | POS            | NEG            | NEG        | POS |
| <b>CC80-MRSA-IV [PVL+], European caMRSA Clone</b>        | POS                                                                                                                   | POS         | POS             | NEG        | NEG          | NEG                      | POS                                              | POS                                  | POS            | POS            | NEG            | NEG        | POS |
| Riyadh-2988048                                           | POS                                                                                                                   | POS         | POS             | NEG        | NEG          | NEG                      | POS                                              | POS                                  | POS            | POS            | NEG            | NEG        | POS |
| Riyadh-2990585-2                                         | POS                                                                                                                   | POS         | POS             | NEG        | NEG          | NEG                      | POS                                              | POS                                  | POS            | POS            | NEG            | NEG        | POS |
| Riyadh-2990585-1                                         | POS                                                                                                                   | POS         | POS             | NEG        | NEG          | NEG                      | POS                                              | POS                                  | POS            | POS            | NEG            | NEG        | POS |
| Riyadh-2826033                                           | POS                                                                                                                   | POS         | POS             | NEG        | NEG          | NEG                      | POS                                              | POS                                  | POS            | POS            | NEG            | NEG        | POS |
| Riyadh-1601562                                           | POS                                                                                                                   | POS         | POS             | NEG        | NEG          | NEG                      | POS                                              | POS                                  | POS            | POS            | NEG            | NEG        | POS |
| Riyadh-2569940                                           | POS                                                                                                                   | POS         | POS             | NEG        | NEG          | NEG                      | POS                                              | POS                                  | POS            | POS            | NEG            | NEG        | POS |
| Riyadh-2571692                                           | POS                                                                                                                   | POS         | POS             | NEG        | NEG          | NEG                      | POS                                              | POS                                  | POS            | POS            | NEG            |            |     |

|                                                          | ADHESION FACTORS / GENES ENCODING MICROBIAL SURFACE COMPONENTS RECOGNIZING ADHESIVE MATRIX MOLECULES (MSCRAMM GENES) |               |                               |             |            |                |                  |              |
|----------------------------------------------------------|----------------------------------------------------------------------------------------------------------------------|---------------|-------------------------------|-------------|------------|----------------|------------------|--------------|
|                                                          | fib                                                                                                                  | fib (MRSA252) | fnbA (total)                  | fnbA (cons) | fnbA (COL) | fnbA (MRSA252) | fnbA (Mu50+MW 2) | fnbA (RF122) |
|                                                          | fibrinogen binding protein (19 kDa)                                                                                  |               | fibronectin-binding protein A |             |            |                |                  |              |
| <b>CC1-MRSA-IV&amp;SCCfus, WA MRSA-1/45</b>              |                                                                                                                      |               |                               |             |            |                |                  |              |
| Riyadh-3108609                                           | POS                                                                                                                  | NEG           | POS                           | POS         | NEG        | NEG            | POS              | NEG          |
| Riyadh-2913235                                           | POS                                                                                                                  | NEG           | POS                           | POS         | NEG        | NEG            | POS              | NEG          |
| <b>CC1/ST772-MRSA-V [PVL+], "Bengal Bay Clone/WA 1"</b>  |                                                                                                                      |               |                               |             |            |                |                  |              |
| Riyadh-2819026                                           | POS                                                                                                                  | AMB           | POS                           | POS         | NEG        | NEG            | POS              | NEG          |
| <b>CC5-MRSA-IV, Paediatric clone</b>                     |                                                                                                                      |               |                               |             |            |                |                  |              |
| Riyadh-2915327-1                                         | POS                                                                                                                  | NEG           | POS                           | POS         | NEG        | NEG            | POS              | NEG          |
| Riyadh-2915327-2                                         | POS                                                                                                                  | NEG           | POS                           | POS         | NEG        | NEG            | POS              | NEG          |
| Riyadh-2                                                 | POS                                                                                                                  | NEG           | POS                           | POS         | NEG        | NEG            | POS              | NEG          |
| <b>CC5-MRSA-IV [PVL+], Paediatric clone</b>              |                                                                                                                      |               |                               |             |            |                |                  |              |
| Riyadh-2986666                                           | POS                                                                                                                  | NEG           | POS                           | POS         | NEG        | NEG            | POS              | NEG          |
| Riyadh-2913235                                           | POS                                                                                                                  | NEG           | POS                           | POS         | NEG        | NEG            | POS              | NEG          |
| <b>CC5-MRSA-IVvar, "Maltese Clone"</b>                   |                                                                                                                      |               |                               |             |            |                |                  |              |
| Riyadh-2983654                                           | POS                                                                                                                  | NEG           | POS                           | POS         | NEG        | NEG            | POS              | NEG          |
| Riyadh-4                                                 | POS                                                                                                                  | NEG           | POS                           | POS         | NEG        | NEG            | POS              | NEG          |
| Riyadh-2790233                                           | POS                                                                                                                  | NEG           | POS                           | POS         | NEG        | NEG            | POS              | NEG          |
| <b>CC5-MRSA-V</b>                                        |                                                                                                                      |               |                               |             |            |                |                  |              |
| Riyadh-2568944                                           | POS                                                                                                                  | NEG           | POS                           | POS         | NEG        | NEG            | POS              | NEG          |
| <b>CC6-MRSA-IV, WA MRSA-51/66</b>                        |                                                                                                                      |               |                               |             |            |                |                  |              |
| Riyadh-2556168                                           | POS                                                                                                                  | NEG           | POS                           | POS         | NEG        | POS            | NEG              | NEG          |
| Riyadh-2824507                                           | POS                                                                                                                  | NEG           | POS                           | POS         | NEG        | POS            | NEG              | NEG          |
| Riyadh-2990831                                           | POS                                                                                                                  | AMB           | POS                           | POS         | NEG        | POS            | NEG              | NEG          |
| <b>CC9/ST239-MRSA-III, Vienna/Hungarian/Brazilian Cl</b> |                                                                                                                      |               |                               |             |            |                |                  |              |
| Riyadh-2                                                 | POS                                                                                                                  | NEG           | POS                           | POS         | POS        | NEG            | NEG              | NEG          |
| Riyadh-3028763                                           | POS                                                                                                                  | NEG           | POS                           | POS         | POS        | NEG            | NEG              | NEG          |
| Riyadh-2817437                                           | POS                                                                                                                  | NEG           | POS                           | POS         | POS        | NEG            | NEG              | NEG          |
| Riyadh-2793706                                           | POS                                                                                                                  | NEG           | POS                           | POS         | POS        | NEG            | NEG              | NEG          |
| Riyadh-2818797                                           | POS                                                                                                                  | NEG           | POS                           | POS         | POS        | NEG            | NEG              | NEG          |
| Riyadh-2822825                                           | POS                                                                                                                  | AMB           | POS                           | POS         | POS        | AMB            | NEG              | NEG          |
| Riyadh-2888905                                           | POS                                                                                                                  | NEG           | POS                           | POS         | POS        | AMB            | NEG              | NEG          |
| Riyadh-2888915                                           | POS                                                                                                                  | NEG           | POS                           | POS         | POS        | AMB            | NEG              | NEG          |
| Riyadh-2567782                                           | POS                                                                                                                  | NEG           | POS                           | POS         | POS        | NEG            | NEG              | NEG          |
| Riyadh-2891670                                           | POS                                                                                                                  | NEG           | POS                           | POS         | POS        | AMB            | NEG              | NEG          |
| Riyadh-2906920                                           | POS                                                                                                                  | NEG           | POS                           | POS         | POS        | AMB            | NEG              | NEG          |
| Riyadh-2812726-1                                         | POS                                                                                                                  | NEG           | POS                           | POS         | POS        | AMB            | NEG              | NEG          |
| Riyadh-0295102                                           | POS                                                                                                                  | NEG           | POS                           | POS         | POS        | NEG            | NEG              | NEG          |
| Riyadh-2820597                                           | POS                                                                                                                  | NEG           | POS                           | POS         | POS        | AMB            | NEG              | NEG          |
| Riyadh-2822088                                           | POS                                                                                                                  | AMB           | POS                           | POS         | POS        | AMB            | NEG              | NEG          |
| Riyadh-3010092                                           | POS                                                                                                                  | NEG           | POS                           | POS         | POS        | NEG            | NEG              | NEG          |
| Riyadh-3022844                                           | POS                                                                                                                  | NEG           | POS                           | POS         | POS        | NEG            | NEG              | NEG          |
| Riyadh-3108214-2                                         | POS                                                                                                                  | NEG           | POS                           | POS         | POS        | NEG            | NEG              | NEG          |
| Riyadh-2823926                                           | POS                                                                                                                  | NEG           | POS                           | POS         | POS        | NEG            | NEG              | NEG          |
| Riyadh-1                                                 | POS                                                                                                                  | AMB           | POS                           | POS         | POS        | NEG            | NEG              | NEG          |
| Riyadh-2818388                                           | POS                                                                                                                  | NEG           | POS                           | POS         | POS        | NEG            | NEG              | NEG          |
| Riyadh-2813215                                           | POS                                                                                                                  | NEG           | POS                           | POS         | POS        | NEG            | NEG              | NEG          |
| <b>CC9/ST834-MRSA-(atypical SCCmec)</b>                  |                                                                                                                      |               |                               |             |            |                |                  |              |
| Riyadh-3103521                                           | POS                                                                                                                  | NEG           | POS                           | POS         | NEG        | POS            | NEG              | NEG          |
| <b>CC22-MRSA-IV, Barnim/UK-EMRSA-15</b>                  |                                                                                                                      |               |                               |             |            |                |                  |              |
| Riyadh-2553350                                           | NEG                                                                                                                  | POS           | POS                           | POS         | NEG        | NEG            | POS              | NEG          |
| Riyadh-2571758                                           | NEG                                                                                                                  | POS           | POS                           | POS         | NEG        | NEG            | POS              | NEG          |
| Riyadh-3029203                                           | NEG                                                                                                                  | POS           | POS                           | POS         | NEG        | NEG            | POS              | NEG          |
| Riyadh-3039785                                           | NEG                                                                                                                  | POS           | POS                           | POS         | NEG        | NEG            | POS              | NEG          |
| Riyadh-3105594                                           | NEG                                                                                                                  | POS           | POS                           | POS         | NEG        | NEG            | POS              | NEG          |
| Riyadh_IC_204-2                                          | NEG                                                                                                                  | POS           | POS                           | POS         | NEG        | AMB            | POS              | NEG          |
| Riyadh-3003974                                           | NEG                                                                                                                  | POS           | POS                           | POS         | NEG        | NEG            | POS              | NEG          |
| Riyadh_IC_067                                            | NEG                                                                                                                  | POS           | POS                           | POS         | NEG        | NEG            | POS              | NEG          |
| Riyadh-2988627                                           | NEG                                                                                                                  | POS           | POS                           | POS         | NEG        | NEG            | POS              | NEG          |
| Riyadh-3112581                                           | NEG                                                                                                                  | POS           | POS                           | POS         | NEG        | NEG            | POS              | NEG          |
| <b>CC22-MRSA-IV [PVL+]</b>                               |                                                                                                                      |               |                               |             |            |                |                  |              |
| Riyadh-2781996-1                                         | NEG                                                                                                                  | POS           | POS                           | POS         | NEG        | NEG            | POS              | NEG          |
| Riyadh-3103432                                           | NEG                                                                                                                  | POS           | POS                           | POS         | NEG        | NEG            | POS              | NEG          |
| Riyadh-3026502                                           | NEG                                                                                                                  | POS           | POS                           | POS         | NEG        | NEG            | POS              | NEG          |
| Riyadh-3081378-2                                         | NEG                                                                                                                  | POS           | POS                           | POS         | NEG        | NEG            | POS              | NEG          |
| Riyadh_IC_185                                            | NEG                                                                                                                  | POS           | POS                           | POS         | NEG        | NEG            | POS              | NEG          |
| Riyadh_IC_204-1                                          | NEG                                                                                                                  | POS           | POS                           | POS         | NEG        | AMB            | POS              | NEG          |
| Riyadh-2559371                                           | NEG                                                                                                                  | POS           | POS                           | POS         | NEG        | NEG            | POS              | NEG          |
| Riyadh-2753975                                           | NEG                                                                                                                  | POS           | POS                           | POS         | NEG        | NEG            | POS              | NEG          |
| Riyadh-2775605                                           | NEG                                                                                                                  | POS           | POS                           | POS         | NEG        | NEG            | POS              | NEG          |
| Riyadh-2781996-2                                         | NEG                                                                                                                  | POS           | POS                           | POS         | NEG        | NEG            | POS              | NEG          |
| Riyadh-2823783-2                                         | NEG                                                                                                                  | POS           | POS                           | POS         | NEG        | NEG            | POS              | NEG          |
| Riyadh-2876601                                           | NEG                                                                                                                  | POS           | POS                           | POS         | NEG        | NEG            | POS              | NEG          |
| Riyadh-3036074                                           | NEG                                                                                                                  | POS           | POS                           | POS         | NEG        | NEG            | POS              | NEG          |
| Riyadh-3053099                                           | NEG                                                                                                                  | POS           | POS                           | POS         | NEG        | NEG            | POS              | NEG          |
| Riyadh-3055366                                           | NEG                                                                                                                  | POS           | POS                           | POS         | NEG        | NEG            | POS              | NEG          |
| Riyadh-3082712                                           | NEG                                                                                                                  | POS           | POS                           | POS         | NEG        | NEG            | POS              | NEG          |
| Riyadh-3087502                                           | NEG                                                                                                                  | POS           | POS                           | POS         | NEG        | NEG            | POS              | NEG          |
| Riyadh-6                                                 | NEG                                                                                                                  | POS           | POS                           | POS         | NEG        | NEG            | POS              | NEG          |
| Riyadh-7                                                 | NEG                                                                                                                  | POS           | POS                           | POS         | NEG        | NEG            | POS              | NEG          |
| Riyadh-8                                                 | NEG                                                                                                                  | POS           | POS                           | POS         | NEG        | NEG            | POS              | NEG          |
| <b>CC30-MRSA-IV [PVL+], Southwest Pacific Clone</b>      |                                                                                                                      |               |                               |             |            |                |                  |              |
| Riyadh-10                                                | NEG                                                                                                                  | POS           | POS                           | POS         | NEG        | POS            | NEG              | NEG          |
| Riyadh_IC_123                                            | NEG                                                                                                                  | POS           | POS                           | POS         | NEG        | POS            | NEG              | NEG          |
| Riyadh-3080713                                           | NEG                                                                                                                  | POS           | POS                           | POS         | NEG        | POS            | NEG              | NEG          |
| Riyadh-2803856                                           | NEG                                                                                                                  | POS           | POS                           | POS         | NEG        | POS            | NEG              | NEG          |
| Riyadh-2817276-1                                         | NEG                                                                                                                  | POS           | POS                           | POS         | NEG        | POS            | NEG              | NEG          |
| Riyadh-2817571-2                                         | NEG                                                                                                                  | POS           | POS                           | POS         | NEG        | POS            | NEG              | NEG          |
| Riyadh-3033868                                           | NEG                                                                                                                  | POS           | POS                           | POS         | NEG        | POS            | NEG              | NEG          |
| Riyadh-2550108                                           | NEG                                                                                                                  | POS           | POS                           | POS         | NEG        | POS            | NEG              | NEG          |
| Riyadh-3095056-2                                         | NEG                                                                                                                  | POS           | POS                           | POS         | NEG        | POS            | NEG              | NEG          |
| Riyadh-2819899                                           | NEG                                                                                                                  | POS           | POS                           | POS         | NEG        | POS            | NEG              | NEG          |
| Riyadh-2821805                                           | NEG                                                                                                                  | POS           | POS                           | POS         | NEG        | POS            | NEG              | NEG          |
| Riyadh-3013928                                           | NEG                                                                                                                  | POS           | POS                           | POS         | NEG        | POS            | NEG              | NEG          |
| Riyadh-3029402                                           | NEG                                                                                                                  | POS           | POS                           | POS         | NEG        | POS            | NEG              | NEG          |
| <b>CC45/agr IV-MRSA-IV, WA MRSA-23</b>                   |                                                                                                                      |               |                               |             |            |                |                  |              |
| Riyadh-3081378-1                                         | NEG                                                                                                                  | AMB           | POS                           | POS         | NEG        | POS            | NEG              | NEG          |
| <b>CC80-MRSA-IV</b>                                      |                                                                                                                      |               |                               |             |            |                |                  |              |
| Riyadh-3107635                                           | POS                                                                                                                  | NEG           | POS                           | POS         | NEG        | NEG            | NEG              | NEG          |
| Riyadh-2987458                                           | POS                                                                                                                  | NEG           | POS                           | POS         | NEG        | NEG            | NEG              | NEG          |
| <b>CC80-MRSA-IV [PVL+], European caMRSA Clone</b>        |                                                                                                                      |               |                               |             |            |                |                  |              |
| Riyadh-2988048                                           | POS                                                                                                                  | NEG           | POS                           | POS         | NEG        | NEG            | NEG              | NEG          |
| Riyadh-2990585-2                                         | POS                                                                                                                  | NEG           | POS                           | POS         | NEG        | NEG            | NEG              | NEG          |
| Riyadh-2990585-1                                         | POS                                                                                                                  | NEG           | POS                           | POS         | NEG        | NEG            | NEG              | NEG          |
| Riyadh-2826033                                           | POS                                                                                                                  | NEG           | POS                           | POS         | NEG        | NEG            | NEG              | NEG          |
| Riyadh-1601562                                           | POS                                                                                                                  | NEG           | POS                           | POS         | NEG        | NEG            | NEG              | NEG          |
| Riyadh-2569940                                           | POS                                                                                                                  | AMB           | POS                           | POS         | NEG        | NEG            | NEG              | NEG          |
| Riyadh-2571692                                           | POS                                                                                                                  | AMB           | POS                           | POS         | NEG        | NEG            | NEG              | NEG          |
| Riyadh-2763029                                           | POS                                                                                                                  | NEG           | POS                           | POS         | NEG        | NEG            | NEG              | NEG          |
| Riyadh-2767090                                           | POS                                                                                                                  | NEG           | POS                           | POS         | NEG        | NEG            | NEG              | NEG          |
| Riyadh-2775130                                           | POS                                                                                                                  | NEG           | POS                           | POS         | NEG        | NEG            | NEG              | NEG          |
| Riyadh-2778256                                           | POS                                                                                                                  | NEG           | POS                           | POS         | NEG        | NEG            | NEG              | NEG          |
| Riyadh-2817505                                           | POS                                                                                                                  | NEG           | POS                           | POS         | NEG        | NEG            | NEG              | NEG          |
| Riyadh-3024912                                           | POS                                                                                                                  | NEG           | POS                           | POS         | NEG        | NEG            | NEG              | NEG          |
| Riyadh-2788690                                           | POS                                                                                                                  | NEG           | POS                           | POS         | NEG        | NEG            | NEG              | NEG          |
| Riyadh-2829034                                           | POS                                                                                                                  | NEG           | POS                           | POS         | NEG        | NEG            | NEG              | NEG          |
| Riyadh-3                                                 | POS                                                                                                                  | NEG           | POS                           | POS         | NEG        | NEG            | NEG              | NEG          |
| Riyadh-5                                                 | POS                                                                                                                  | NEG           | POS                           | POS         | NEG        | NEG            | NEG              | NEG          |
| Riyadh-2553167                                           | POS                                                                                                                  | NEG           | POS                           | POS         | NEG        | NEG            | NEG              | NEG          |
| Riyadh-3002592                                           | POS                                                                                                                  | NEG           | POS                           | POS         | NEG        | AMB            | NEG              | NEG          |
| <b>CC88-MRSA-IV [PVL+]</b>                               |                                                                                                                      |               |                               |             |            |                |                  |              |
| Riyadh-2736996                                           | POS                                                                                                                  | NEG           | POS                           | POS         | NEG        | NEG            | NEG              | NEG          |
| Riyadh-2942396                                           | POS                                                                                                                  | AMB           | POS                           | POS         | NEG        | NEG            | NEG              | NEG          |
| Riyadh-3105391                                           | POS                                                                                                                  | NEG           | POS                           | POS         | NEG        | NEG            | NEG              | NEG          |
| <b>CC97-MRSA-V</b>                                       |                                                                                                                      |               |                               |             |            |                |                  |              |
| Riyadh-0297622                                           | POS                                                                                                                  | NEG           | POS                           | POS         | NEG        | NEG            | NEG              | NEG          |
| Riyadh-3025471                                           | POS                                                                                                                  | NEG           | POS                           | POS         | NEG        | NEG            | NEG              | NEG          |

|                                                          | ADHAESION FACTORS / GENES ENCODING MICROBIAL SURFACE COMPONENTS RECOGNIZING ADHESIVE MATRIX MOLECULES (MSCRAMM GENES) |            |                     |             |            |             |               |                                                                                                     |           |               |                |
|----------------------------------------------------------|-----------------------------------------------------------------------------------------------------------------------|------------|---------------------|-------------|------------|-------------|---------------|-----------------------------------------------------------------------------------------------------|-----------|---------------|----------------|
|                                                          | fnbB (total)                                                                                                          | fnbB (COL) | fnbB (COL+Mu50+MW2) | fnbB (Mu50) | fnbB (MW2) | fnbB (ST15) | fnbB (ST45-2) | map (total)                                                                                         | map (COL) | map (MRSA252) | map (Mu50+MW2) |
|                                                          | fibronectin-binding protein B                                                                                         |            |                     |             |            |             |               | Major histocompatibility complex class II analog protein<br>(=Extracellular adherence protein, eap) |           |               |                |
| <b>CC1-MRSA-IV&amp;SCCFus, WA MRSA-1/45</b>              |                                                                                                                       |            |                     |             |            |             |               |                                                                                                     |           |               |                |
| Riyadh-3108609                                           | POS                                                                                                                   | NEG        | POS                 | NEG         | AMB        | NEG         | NEG           | POS                                                                                                 | NEG       | NEG           | POS            |
| Riyadh-2913235                                           | POS                                                                                                                   | NEG        | AMB                 | AMB         | NEG        | NEG         | NEG           | POS                                                                                                 | POS       | NEG           | POS            |
| <b>CC1/ST772-MRSA-V [PVL+], "Bengal Bay Clone/WA 1"</b>  |                                                                                                                       |            |                     |             |            |             |               |                                                                                                     |           |               |                |
| Riyadh-2819026                                           | POS                                                                                                                   | NEG        | AMB                 | AMB         | NEG        | POS         | NEG           | POS                                                                                                 | POS       | AMB           | POS            |
| <b>CC5-MRSA-IV, Paediatric clone</b>                     |                                                                                                                       |            |                     |             |            |             |               |                                                                                                     |           |               |                |
| Riyadh-2915327-1                                         | POS                                                                                                                   | NEG        | AMB                 | POS         | NEG        | AMB         | NEG           | POS                                                                                                 | POS       | NEG           | POS            |
| Riyadh-2915327-2                                         | POS                                                                                                                   | NEG        | AMB                 | POS         | NEG        | AMB         | NEG           | POS                                                                                                 | POS       | NEG           | POS            |
| Riyadh-2                                                 | POS                                                                                                                   | NEG        | AMB                 | POS         | NEG        | AMB         | NEG           | POS                                                                                                 | POS       | NEG           | POS            |
| <b>CC5-MRSA-IV [PVL+], Paediatric clone</b>              |                                                                                                                       |            |                     |             |            |             |               |                                                                                                     |           |               |                |
| Riyadh-2986666                                           | POS                                                                                                                   | NEG        | AMB                 | POS         | NEG        | AMB         | NEG           | POS                                                                                                 | POS       | NEG           | POS            |
| Riyadh-2913235                                           | POS                                                                                                                   | NEG        | AMB                 | POS         | NEG        | AMB         | NEG           | POS                                                                                                 | POS       | NEG           | POS            |
| <b>CC5-MRSA-IVvar, "Maltese Clone"</b>                   |                                                                                                                       |            |                     |             |            |             |               |                                                                                                     |           |               |                |
| Riyadh-2983654                                           | POS                                                                                                                   | NEG        | POS                 | AMB         | NEG        | AMB         | NEG           | POS                                                                                                 | POS       | NEG           | POS            |
| Riyadh-4                                                 | POS                                                                                                                   | NEG        | AMB                 | POS         | NEG        | AMB         | NEG           | POS                                                                                                 | POS       | NEG           | POS            |
| Riyadh-2790233                                           | POS                                                                                                                   | NEG        | AMB                 | POS         | NEG        | AMB         | NEG           | POS                                                                                                 | POS       | NEG           | POS            |
| <b>CC5-MRSA-V</b>                                        |                                                                                                                       |            |                     |             |            |             |               |                                                                                                     |           |               |                |
| Riyadh-2568944                                           | POS                                                                                                                   | NEG        | AMB                 | POS         | NEG        | AMB         | NEG           | POS                                                                                                 | POS       | NEG           | POS            |
| <b>CC6-MRSA-IV, WA MRSA-51/66</b>                        |                                                                                                                       |            |                     |             |            |             |               |                                                                                                     |           |               |                |
| Riyadh-2556168                                           | POS                                                                                                                   | NEG        | AMB                 | POS         | NEG        | NEG         | NEG           | POS                                                                                                 | NEG       | NEG           | POS            |
| Riyadh-2824507                                           | POS                                                                                                                   | NEG        | AMB                 | POS         | NEG        | NEG         | NEG           | POS                                                                                                 | NEG       | NEG           | POS            |
| Riyadh-2990831                                           | POS                                                                                                                   | NEG        | AMB                 | POS         | NEG        | NEG         | NEG           | POS                                                                                                 | POS       | NEG           | POS            |
| <b>CC9/ST239-MRSA-III, Vienna/Hungarian/Brazilian Cl</b> |                                                                                                                       |            |                     |             |            |             |               |                                                                                                     |           |               |                |
| Riyadh-5                                                 | POS                                                                                                                   | POS        | AMB                 | AMB         | NEG        | NEG         | NEG           | POS                                                                                                 | POS       | NEG           | AMB            |
| Riyadh-3028763                                           | POS                                                                                                                   | POS        | AMB                 | AMB         | NEG        | NEG         | NEG           | POS                                                                                                 | POS       | NEG           | POS            |
| Riyadh-2817437                                           | POS                                                                                                                   | POS        | AMB                 | AMB         | NEG        | NEG         | NEG           | POS                                                                                                 | POS       | NEG           | POS            |
| Riyadh-2793706                                           | POS                                                                                                                   | POS        | AMB                 | AMB         | NEG        | NEG         | NEG           | POS                                                                                                 | POS       | NEG           | POS            |
| Riyadh-2818797                                           | POS                                                                                                                   | POS        | AMB                 | AMB         | NEG        | NEG         | NEG           | POS                                                                                                 | POS       | NEG           | POS            |
| Riyadh-2822825                                           | POS                                                                                                                   | POS        | AMB                 | AMB         | NEG        | NEG         | NEG           | POS                                                                                                 | POS       | NEG           | POS            |
| Riyadh-2888905                                           | POS                                                                                                                   | POS        | AMB                 | AMB         | NEG        | NEG         | NEG           | POS                                                                                                 | POS       | NEG           | POS            |
| Riyadh-2888915                                           | POS                                                                                                                   | POS        | AMB                 | AMB         | NEG        | NEG         | NEG           | NEG                                                                                                 | NEG       | NEG           | NEG            |
| Riyadh-2567782                                           | POS                                                                                                                   | POS        | AMB                 | AMB         | NEG        | NEG         | NEG           | POS                                                                                                 | POS       | NEG           | AMB            |
| Riyadh-2891670                                           | POS                                                                                                                   | POS        | AMB                 | AMB         | NEG        | NEG         | NEG           | POS                                                                                                 | POS       | NEG           | POS            |
| Riyadh-3006920                                           | POS                                                                                                                   | POS        | AMB                 | AMB         | NEG        | NEG         | NEG           | POS                                                                                                 | POS       | NEG           | AMB            |
| Riyadh-2817276-1                                         | POS                                                                                                                   | POS        | AMB                 | AMB         | NEG        | NEG         | NEG           | POS                                                                                                 | POS       | NEG           | POS            |
| Riyadh-0295102                                           | POS                                                                                                                   | POS        | AMB                 | AMB         | NEG        | NEG         | NEG           | POS                                                                                                 | POS       | NEG           | AMB            |
| Riyadh-2820597                                           | POS                                                                                                                   | POS        | AMB                 | AMB         | NEG        | NEG         | NEG           | POS                                                                                                 | POS       | NEG           | POS            |
| Riyadh-2822088                                           | POS                                                                                                                   | POS        | AMB                 | AMB         | NEG        | NEG         | NEG           | POS                                                                                                 | POS       | NEG           | POS            |
| Riyadh-3010092                                           | POS                                                                                                                   | POS        | AMB                 | AMB         | NEG        | NEG         | NEG           | POS                                                                                                 | POS       | NEG           | AMB            |
| Riyadh-3022844                                           | POS                                                                                                                   | POS        | AMB                 | AMB         | NEG        | NEG         | NEG           | POS                                                                                                 | POS       | NEG           | AMB            |
| Riyadh-3108214-2                                         | POS                                                                                                                   | POS        | AMB                 | NEG         | NEG        | NEG         | NEG           | POS                                                                                                 | POS       | NEG           | NEG            |
| Riyadh-2823926                                           | POS                                                                                                                   | POS        | AMB                 | POS         | NEG        | NEG         | NEG           | POS                                                                                                 | POS       | NEG           | POS            |
| Riyadh-1                                                 | POS                                                                                                                   | POS        | AMB                 | AMB         | NEG        | NEG         | NEG           | POS                                                                                                 | POS       | NEG           | POS            |
| Riyadh-2818388                                           | POS                                                                                                                   | POS        | AMB                 | AMB         | NEG        | NEG         | NEG           | POS                                                                                                 | POS       | NEG           | POS            |
| Riyadh-3112515                                           | POS                                                                                                                   | POS        | AMB                 | AMB         | NEG        | NEG         | NEG           | POS                                                                                                 | POS       | NEG           | POS            |
| <b>CC9/ST834-MRSA-(atypical SCCmec)</b>                  |                                                                                                                       |            |                     |             |            |             |               |                                                                                                     |           |               |                |
| Riyadh-3103521                                           | POS                                                                                                                   | NEG        | AMB                 | POS         | NEG        | AMB         | NEG           | POS                                                                                                 | NEG       | NEG           | POS            |
| <b>CC22-MRSA-IV, Barnim/UK-EMRSA-15</b>                  |                                                                                                                       |            |                     |             |            |             |               |                                                                                                     |           |               |                |
| Riyadh-2553350                                           | NEG                                                                                                                   | NEG        | NEG                 | NEG         | NEG        | NEG         | NEG           | POS                                                                                                 | NEG       | NEG           | POS            |
| Riyadh-2571758                                           | NEG                                                                                                                   | NEG        | NEG                 | NEG         | NEG        | NEG         | NEG           | POS                                                                                                 | NEG       | NEG           | POS            |
| Riyadh-3029203                                           | NEG                                                                                                                   | NEG        | NEG                 | NEG         | NEG        | NEG         | NEG           | POS                                                                                                 | NEG       | NEG           | POS            |
| Riyadh-3039785                                           | NEG                                                                                                                   | NEG        | NEG                 | NEG         | NEG        | NEG         | NEG           | POS                                                                                                 | NEG       | NEG           | POS            |
| Riyadh-3105594                                           | NEG                                                                                                                   | NEG        | NEG                 | NEG         | NEG        | NEG         | NEG           | POS                                                                                                 | NEG       | NEG           | POS            |
| Riyadh_IC_204-2                                          | POS                                                                                                                   | NEG        | AMB                 | NEG         | POS        | NEG         | NEG           | POS                                                                                                 | NEG       | NEG           | POS            |
| Riyadh-3003974                                           | NEG                                                                                                                   | NEG        | NEG                 | NEG         | NEG        | NEG         | NEG           | POS                                                                                                 | NEG       | NEG           | POS            |
| Riyadh_IC_067                                            | NEG                                                                                                                   | NEG        | NEG                 | NEG         | NEG        | NEG         | NEG           | POS                                                                                                 | NEG       | NEG           | POS            |
| Riyadh-2988627                                           | NEG                                                                                                                   | NEG        | NEG                 | NEG         | NEG        | NEG         | NEG           | POS                                                                                                 | NEG       | NEG           | POS            |
| Riyadh-3112581                                           | NEG                                                                                                                   | NEG        | NEG                 | NEG         | NEG        | NEG         | NEG           | POS                                                                                                 | NEG       | NEG           | POS            |
| <b>CC22-MRSA-IV [PVL+]</b>                               |                                                                                                                       |            |                     |             |            |             |               |                                                                                                     |           |               |                |
| Riyadh-2781996-1                                         | POS                                                                                                                   | NEG        | AMB                 | NEG         | POS        | NEG         | NEG           | POS                                                                                                 | NEG       | NEG           | POS            |
| Riyadh-3103432                                           | POS                                                                                                                   | AMB        | AMB                 | NEG         | POS        | NEG         | NEG           | POS                                                                                                 | NEG       | NEG           | POS            |
| Riyadh-3026502                                           | NEG                                                                                                                   | NEG        | NEG                 | NEG         | NEG        | NEG         | NEG           | POS                                                                                                 | NEG       | NEG           | AMB            |
| Riyadh-3081378-2                                         | POS                                                                                                                   | NEG        | AMB                 | NEG         | POS        | NEG         | NEG           | POS                                                                                                 | NEG       | NEG           | POS            |
| Riyadh_IC_185                                            | POS                                                                                                                   | NEG        | AMB                 | NEG         | POS        | NEG         | NEG           | POS                                                                                                 | NEG       | NEG           | POS            |
| Riyadh_IC_204-1                                          | POS                                                                                                                   | NEG        | AMB                 | NEG         | POS        | NEG         | NEG           | POS                                                                                                 | NEG       | NEG           | POS            |
| Riyadh-3159371                                           | POS                                                                                                                   | AMB        | AMB                 | NEG         | POS        | NEG         | NEG           | POS                                                                                                 | NEG       | NEG           | POS            |
| Riyadh-2753975                                           | POS                                                                                                                   | NEG        | AMB                 | NEG         | POS        | NEG         | NEG           | POS                                                                                                 | NEG       | NEG           | POS            |
| Riyadh-2775605                                           | POS                                                                                                                   | NEG        | AMB                 | NEG         | POS        | NEG         | NEG           | POS                                                                                                 | NEG       | NEG           | POS            |
| Riyadh-2781996-2                                         | POS                                                                                                                   | NEG        | AMB                 | NEG         | POS        | NEG         | NEG           | POS                                                                                                 | NEG       | NEG           | POS            |
| Riyadh-2823783-2                                         | POS                                                                                                                   | NEG        | AMB                 | NEG         | POS        | NEG         | NEG           | POS                                                                                                 | NEG       | NEG           | POS            |
| Riyadh-2876601                                           | POS                                                                                                                   | NEG        | AMB                 | NEG         | POS        | NEG         | NEG           | POS                                                                                                 | NEG       | NEG           | POS            |
| Riyadh-3036074                                           | POS                                                                                                                   | NEG        | AMB                 | NEG         | POS        | NEG         | NEG           | POS                                                                                                 | NEG       | NEG           | POS            |
| Riyadh-3053099                                           | POS                                                                                                                   | NEG        | POS                 | NEG         | AMB        | NEG         | NEG           | POS                                                                                                 | NEG       | NEG           | POS            |
| Riyadh-3055366                                           | POS                                                                                                                   | NEG        | AMB                 | NEG         | POS        | NEG         | NEG           | POS                                                                                                 | NEG       | NEG           | POS            |
| Riyadh-3082712                                           | POS                                                                                                                   | NEG        | AMB                 | NEG         | POS        | NEG         | NEG           | POS                                                                                                 | NEG       | NEG           | POS            |
| Riyadh-2987502                                           | POS                                                                                                                   | AMB        | AMB                 | NEG         | POS        | NEG         | NEG           | POS                                                                                                 | NEG       | NEG           | AMB            |
| Riyadh-6                                                 | POS                                                                                                                   | NEG        | AMB                 | NEG         | POS        | NEG         | NEG           | POS                                                                                                 | NEG       | NEG           | POS            |
| Riyadh-7                                                 | POS                                                                                                                   | NEG        | AMB                 | NEG         | POS        | NEG         | NEG           | POS                                                                                                 | NEG       | NEG           | POS            |
| Riyadh-8                                                 | POS                                                                                                                   | NEG        | AMB                 | NEG         | POS        | NEG         | NEG           | POS                                                                                                 | NEG       | NEG           | POS            |
| <b>CC30-MRSA-IV [PVL+], Southwest Pacific Clone</b>      |                                                                                                                       |            |                     |             |            |             |               |                                                                                                     |           |               |                |
| Riyadh-10                                                | POS                                                                                                                   | NEG        | AMB                 | POS         | NEG        | NEG         | NEG           | POS                                                                                                 | NEG       | POS           | NEG            |
| Riyadh_IC_123                                            | POS                                                                                                                   | NEG        | AMB                 | POS         | NEG        | NEG         | NEG           | POS                                                                                                 | NEG       | POS           | NEG            |
| Riyadh-3080713                                           | POS                                                                                                                   | NEG        | AMB                 | AMB         | NEG        | NEG         | NEG           | POS                                                                                                 | NEG       | POS           | NEG            |
| Riyadh-2803856                                           | POS                                                                                                                   | NEG        | AMB                 | POS         | NEG        | NEG         | NEG           | POS                                                                                                 | NEG       | POS           | NEG            |
| Riyadh-2817276-1                                         | POS                                                                                                                   | NEG        | POS                 | AMB         | NEG        | NEG         | NEG           | POS                                                                                                 | NEG       | POS           | AMB            |
| Riyadh-2817571-2                                         | POS                                                                                                                   | NEG        | AMB                 | POS         | NEG        | NEG         | NEG           | POS                                                                                                 | NEG       | POS           | NEG            |
| Riyadh-3033868                                           | POS                                                                                                                   | NEG        | AMB                 | POS         | NEG        | NEG         | NEG           | POS                                                                                                 | NEG       | POS           | NEG            |
| Riyadh-2550108                                           | POS                                                                                                                   | NEG        | AMB                 | POS         | NEG        | NEG         | NEG           | POS                                                                                                 | NEG       | POS           | NEG            |
| Riyadh-3095056-2                                         | POS                                                                                                                   | NEG        | POS                 | AMB         | NEG        | NEG         | NEG           | POS                                                                                                 | NEG       | POS           | NEG            |
| Riyadh-2819899                                           | POS                                                                                                                   | NEG        | AMB                 | POS         | NEG        | NEG         | NEG           | POS                                                                                                 | NEG       | POS           | NEG            |
| Riyadh-2821805                                           | POS                                                                                                                   | NEG        | POS                 | AMB         | NEG        | NEG         | NEG           | POS                                                                                                 | NEG       | POS           | NEG            |
| Riyadh-3013928                                           | POS                                                                                                                   | NEG        | POS                 | AMB         | NEG        | NEG         | NEG           | POS                                                                                                 | NEG       | POS           | NEG            |
| Riyadh-3029402                                           | POS                                                                                                                   | NEG        | POS                 | AMB         | NEG        | NEG         | NEG           | POS                                                                                                 | NEG       | POS           | NEG            |
| <b>CC45/agr IV-MRSA-IV, WA MRSA-23</b>                   |                                                                                                                       |            |                     |             |            |             |               |                                                                                                     |           |               |                |
| Riyadh-3081378-1                                         | POS                                                                                                                   | NEG        | AMB                 | NEG         | NEG        | NEG         | POS           | POS                                                                                                 | NEG       | POS           | NEG            |
| <b>CC80-MRSA-IV</b>                                      |                                                                                                                       |            |                     |             |            |             |               |                                                                                                     |           |               |                |
| Riyadh-3107635                                           | POS                                                                                                                   | NEG        | AMB                 | NEG         | POS        | NEG         | NEG           | POS                                                                                                 | NEG       | NEG           | POS            |
| Riyadh-2987458                                           | POS                                                                                                                   | NEG        | POS                 | NEG         | AMB        | NEG         | NEG           | POS                                                                                                 | NEG       | NEG           | POS            |
| <b>CC80-MRSA-IV [PVL+], European caMRSA Clone</b>        |                                                                                                                       |            |                     |             |            |             |               |                                                                                                     |           |               |                |
| Riyadh-2988048                                           | POS                                                                                                                   | NEG        | AMB                 | NEG         | POS        | NEG         | NEG           | POS                                                                                                 | NEG       | NEG           | POS            |
| Riyadh-2990585-2                                         | POS                                                                                                                   | NEG        | POS                 | NEG         | AMB        | NEG         | NEG           | POS                                                                                                 | NEG       | NEG           | POS            |
| Riyadh-2990585-1                                         | POS                                                                                                                   | NEG        | POS                 | NEG         | AMB        | NEG         | NEG           | POS                                                                                                 | AMB       | NEG           | POS            |
| Riyadh-2826033                                           | POS                                                                                                                   | NEG        | POS                 | NEG         | AMB        | NEG         | NEG           | POS                                                                                                 | AMB       | NEG           | POS            |
| Riyadh-1601562                                           | POS                                                                                                                   | NEG        | AMB                 | NEG         | POS        | NEG         | NEG           | POS                                                                                                 | NEG       | NEG           | POS            |
| Riyadh-2569940                                           | POS                                                                                                                   | NEG        | AMB                 | NEG         | POS        | NEG         | NEG           | POS                                                                                                 | NEG       | NEG           | POS            |
| Riyadh-2571692                                           | POS                                                                                                                   | NEG        | AMB                 | NEG         | POS        | NEG         | NEG           | POS                                                                                                 | POS       | NEG           | POS            |
| Riyadh-2763029                                           | POS                                                                                                                   | NEG        | AMB                 | NEG         | POS        | NEG         | NEG           | POS                                                                                                 | AMB       | NEG           | POS            |
| Riyadh-2767090                                           | POS                                                                                                                   | NEG        | AMB                 | NEG         | POS        | NEG         | NEG           | POS                                                                                                 | NEG       | NEG           | POS            |
| Riyadh-2775130                                           | POS                                                                                                                   | NEG        | AMB                 | NEG         | POS        | NEG         | NEG           | POS                                                                                                 | NEG       | NEG           | POS            |
| Riyadh-2778256                                           | POS                                                                                                                   | NEG        | POS                 | NEG         | AMB        | NEG         | NEG           | POS                                                                                                 | NEG       | NEG           | POS            |
| Riyadh-2817505                                           | POS                                                                                                                   | NEG        | POS                 | NEG         | AMB        | NEG         | NEG           | POS                                                                                                 | AMB       | NEG           | POS            |
| Riyadh-3024912                                           | POS                                                                                                                   | NEG        | POS                 | NEG         | AMB        | NEG         | NEG           | POS                                                                                                 | NEG       | NEG           | POS            |
| Riyadh-2786990                                           | POS                                                                                                                   | NEG        | AMB                 | NEG         | POS        | NEG         | NEG           | POS                                                                                                 | AMB       | NEG           | POS            |
| Riyadh-3292034                                           | POS                                                                                                                   | NEG        | AMB                 | NEG         | POS        | NEG         | NEG           | POS                                                                                                 | AMB       | NEG           | POS            |
| Riyadh-3                                                 | POS                                                                                                                   | NEG        | AMB                 | NEG         | POS        | NEG         | NEG           | POS                                                                                                 | AMB       | NEG           | POS            |
| Riyadh-5                                                 | POS                                                                                                                   | NEG        | AMB                 | NEG         | POS        | NEG         | NEG           | POS                                                                                                 | AMB       | NEG           | POS            |
| Riyadh-2553167                                           | POS                                                                                                                   | NEG        | AMB                 | NEG         | POS        | NEG         | NEG           | POS                                                                                                 | NEG       | NEG           | POS            |
| Riyadh-3002592                                           | POS                                                                                                                   | NEG        | POS                 | NEG         | AMB        | NEG         | NEG           | POS                                                                                                 | AMB       | NEG           | POS            |
| <b>CC88-MRSA-IV [PVL+]</b>                               |                                                                                                                       |            |                     |             |            |             |               |                                                                                                     |           |               |                |
| Riyadh-2736996                                           | POS                                                                                                                   | NEG        | AMB                 | POS         | NEG        | NEG         | NEG           | POS                                                                                                 | AMB       | AMB           | POS            |
| Riyadh-2942396                                           | POS                                                                                                                   | NEG        | AMB                 | POS         | NEG        | NEG         | NEG           | POS                                                                                                 | AMB       | NEG           | POS            |
| Riyadh-3105391                                           | POS                                                                                                                   | NEG        | AMB                 | POS         | NEG        | NEG         | NEG           | POS                                                                                                 | NEG       | NEG           | POS            |
| <b>CC97-MRSA-V</b>                                       |                                                                                                                       |            |                     |             |            |             |               |                                                                                                     |           |               |                |
| Riyadh-0297622                                           | POS                                                                                                                   | NEG        | AMB                 | POS         | NEG        | NEG         | NEG           | POS                                                                                                 | POS       | AMB           | POS            |
| Riyadh-3025471                                           | POS                                                                                                                   | NEG        | AMB                 | POS         | NEG        | NEG         | NEG           | POS                                                                                                 | POS       | NEG           | POS            |

|                                                              | ADHAESION FACTORS / GENES ENCODING MICROBIAL SURFACE COMPONENTS RECOGNIZING ADHESIVE MATRIX MOLECULES (MSCRAMM GENES) |                 |            |                                  |              |                                                              |           |            |             |                          |                            |
|--------------------------------------------------------------|-----------------------------------------------------------------------------------------------------------------------|-----------------|------------|----------------------------------|--------------|--------------------------------------------------------------|-----------|------------|-------------|--------------------------|----------------------------|
|                                                              | sasG (total)                                                                                                          | sasG (COL+Mu50) | sasG (MW2) | sasG (Other Than MRSA252+R F122) | sdrC (total) | sdrC (cons)                                                  | sdrC (B1) | sdrC (COL) | sdrC (Mu50) | sdrC (MW2+MRSA252+RF122) | sdrC (Other Than 52+RF122) |
|                                                              | Staphylococcus aureus surface protein G                                                                               |                 |            |                                  |              | Ser-Asp rich fibrinogen-/bone sialoprotein-binding protein C |           |            |             |                          |                            |
| <b>CC1-MRSA-IV&amp;SCCFus, WA MRSA-1/45</b>                  | POS                                                                                                                   | NEG             | POS        | POS                              | POS          | POS                                                          | NEG       | NEG        | NEG         | POS                      | POS                        |
| Riyadh-3108609                                               | POS                                                                                                                   | NEG             | POS        | POS                              | POS          | POS                                                          | NEG       | NEG        | NEG         | POS                      | POS                        |
| Riyadh-2913235                                               | POS                                                                                                                   | NEG             | POS        | POS                              | POS          | POS                                                          | NEG       | NEG        | NEG         | POS                      | POS                        |
| <b>CC1/ST772-MRSA-V [PVL+], "Bengal Bay Clone/WA MRSA-1"</b> | POS                                                                                                                   | NEG             | POS        | POS                              | POS          | POS                                                          | AMB       | NEG        | POS         | POS                      | POS                        |
| Riyadh-2819026                                               | POS                                                                                                                   | NEG             | POS        | POS                              | POS          | POS                                                          | AMB       | NEG        | POS         | POS                      | POS                        |
| <b>CC5-MRSA-IV, Paediatric clone</b>                         | POS                                                                                                                   | POS             | NEG        | POS                              | POS          | POS                                                          | NEG       | NEG        | POS         | NEG                      | POS                        |
| Riyadh-2915327-1                                             | POS                                                                                                                   | POS             | NEG        | POS                              | POS          | POS                                                          | NEG       | NEG        | POS         | NEG                      | POS                        |
| Riyadh-2915327-2                                             | POS                                                                                                                   | POS             | NEG        | POS                              | POS          | POS                                                          | NEG       | NEG        | POS         | NEG                      | POS                        |
| Riyadh-2                                                     | POS                                                                                                                   | POS             | NEG        | POS                              | POS          | POS                                                          | NEG       | NEG        | POS         | NEG                      | POS                        |
| <b>CC5-MRSA-IV [PVL+], Paediatric clone</b>                  | POS                                                                                                                   | POS             | AMB        | POS                              | POS          | POS                                                          | AMB       | NEG        | POS         | AMB                      | POS                        |
| Riyadh-2986666                                               | POS                                                                                                                   | POS             | AMB        | POS                              | POS          | POS                                                          | AMB       | NEG        | POS         | AMB                      | POS                        |
| Riyadh-2913235                                               | POS                                                                                                                   | POS             | NEG        | POS                              | POS          | POS                                                          | AMB       | NEG        | POS         | AMB                      | POS                        |
| <b>CC5-MRSA-IVvar, "Maltese Clone"</b>                       | POS                                                                                                                   | POS             | NEG        | POS                              | POS          | POS                                                          | AMB       | NEG        | POS         | NEG                      | POS                        |
| Riyadh-2983654                                               | POS                                                                                                                   | POS             | NEG        | POS                              | POS          | POS                                                          | AMB       | NEG        | POS         | NEG                      | POS                        |
| Riyadh-4                                                     | POS                                                                                                                   | POS             | NEG        | POS                              | POS          | POS                                                          | AMB       | NEG        | POS         | NEG                      | POS                        |
| Riyadh-2790233                                               | POS                                                                                                                   | POS             | NEG        | POS                              | POS          | POS                                                          | AMB       | NEG        | POS         | NEG                      | POS                        |
| <b>CC5-MRSA-V</b>                                            | POS                                                                                                                   | POS             | NEG        | POS                              | POS          | POS                                                          | NEG       | NEG        | POS         | NEG                      | POS                        |
| Riyadh-2568944                                               | POS                                                                                                                   | POS             | NEG        | POS                              | POS          | POS                                                          | NEG       | NEG        | POS         | NEG                      | POS                        |
| <b>CC6-MRSA-IV, WA MRSA-51/66</b>                            | POS                                                                                                                   | NEG             | POS        | POS                              | POS          | POS                                                          | NEG       | POS        | NEG         | NEG                      | POS                        |
| Riyadh-2556168                                               | POS                                                                                                                   | NEG             | POS        | POS                              | POS          | POS                                                          | NEG       | POS        | NEG         | NEG                      | POS                        |
| Riyadh-2824507                                               | POS                                                                                                                   | NEG             | POS        | POS                              | POS          | POS                                                          | NEG       | POS        | NEG         | NEG                      | POS                        |
| Riyadh-2990831                                               | POS                                                                                                                   | NEG             | POS        | POS                              | POS          | POS                                                          | AMB       | POS        | AMB         | AMB                      | POS                        |
| <b>CC9/ST239-MRSA-III, Vienna/Hungarian/Brazilian Clones</b> | POS                                                                                                                   | POS             | NEG        | POS                              | POS          | POS                                                          | NEG       | POS        | NEG         | NEG                      | POS                        |
| Riyadh-9                                                     | POS                                                                                                                   | POS             | NEG        | POS                              | POS          | POS                                                          | NEG       | POS        | NEG         | NEG                      | POS                        |
| Riyadh-3028763                                               | POS                                                                                                                   | POS             | NEG        | POS                              | POS          | POS                                                          | AMB       | POS        | AMB         | NEG                      | POS                        |
| Riyadh-2817437                                               | POS                                                                                                                   | POS             | NEG        | POS                              | POS          | POS                                                          | AMB       | POS        | AMB         | NEG                      | POS                        |
| Riyadh-2793706                                               | POS                                                                                                                   | POS             | NEG        | POS                              | POS          | POS                                                          | AMB       | POS        | AMB         | NEG                      | POS                        |
| Riyadh-2818797                                               | POS                                                                                                                   | POS             | NEG        | POS                              | POS          | POS                                                          | NEG       | POS        | NEG         | NEG                      | POS                        |
| Riyadh-2822825                                               | POS                                                                                                                   | POS             | NEG        | POS                              | POS          | POS                                                          | AMB       | POS        | AMB         | AMB                      | POS                        |
| Riyadh-2888905                                               | POS                                                                                                                   | POS             | NEG        | POS                              | POS          | POS                                                          | AMB       | POS        | AMB         | NEG                      | POS                        |
| Riyadh-2888915                                               | POS                                                                                                                   | POS             | AMB        | POS                              | POS          | POS                                                          | AMB       | POS        | AMB         | AMB                      | POS                        |
| Riyadh-2567782                                               | POS                                                                                                                   | POS             | NEG        | POS                              | POS          | POS                                                          | NEG       | POS        | NEG         | NEG                      | POS                        |
| Riyadh-2891670                                               | POS                                                                                                                   | POS             | NEG        | POS                              | POS          | POS                                                          | AMB       | POS        | AMB         | NEG                      | POS                        |
| Riyadh-3006920                                               | POS                                                                                                                   | POS             | NEG        | POS                              | POS          | POS                                                          | AMB       | POS        | AMB         | NEG                      | POS                        |
| Riyadh-281276-1                                              | POS                                                                                                                   | POS             | NEG        | POS                              | POS          | POS                                                          | AMB       | POS        | AMB         | NEG                      | POS                        |
| Riyadh-0295102                                               | POS                                                                                                                   | POS             | NEG        | POS                              | POS          | POS                                                          | NEG       | POS        | NEG         | NEG                      | POS                        |
| Riyadh-2820597                                               | POS                                                                                                                   | POS             | NEG        | POS                              | POS          | POS                                                          | POS       | POS        | AMB         | NEG                      | POS                        |
| Riyadh-2822088                                               | POS                                                                                                                   | POS             | NEG        | POS                              | POS          | POS                                                          | POS       | POS        | AMB         | NEG                      | POS                        |
| Riyadh-3010092                                               | POS                                                                                                                   | POS             | NEG        | POS                              | POS          | POS                                                          | AMB       | POS        | AMB         | NEG                      | POS                        |
| Riyadh-3022844                                               | POS                                                                                                                   | POS             | NEG        | POS                              | POS          | POS                                                          | AMB       | POS        | AMB         | NEG                      | POS                        |
| Riyadh-3108214-2                                             | POS                                                                                                                   | POS             | NEG        | POS                              | POS          | POS                                                          | NEG       | POS        | NEG         | NEG                      | POS                        |
| Riyadh-2823926                                               | POS                                                                                                                   | POS             | NEG        | POS                              | POS          | POS                                                          | AMB       | POS        | AMB         | NEG                      | POS                        |
| Riyadh-1                                                     | POS                                                                                                                   | POS             | NEG        | POS                              | POS          | POS                                                          | AMB       | POS        | AMB         | NEG                      | POS                        |
| Riyadh-2818388                                               | POS                                                                                                                   | POS             | NEG        | POS                              | POS          | POS                                                          | AMB       | POS        | AMB         | NEG                      | POS                        |
| Riyadh-3112581                                               | POS                                                                                                                   | POS             | NEG        | POS                              | POS          | POS                                                          | AMB       | POS        | AMB         | NEG                      | POS                        |
| <b>CC9/ST834-MRSA-(atypical SCCmec)</b>                      | POS                                                                                                                   | POS             | NEG        | POS                              | POS          | POS                                                          | AMB       | NEG        | POS         | POS                      | POS                        |
| Riyadh-3103521                                               | POS                                                                                                                   | POS             | NEG        | POS                              | POS          | POS                                                          | AMB       | NEG        | POS         | POS                      | POS                        |
| <b>CC22-MRSA-IV, Barnim/UK-EMRSA-15</b>                      | POS                                                                                                                   | NEG             | POS        | POS                              | POS          | POS                                                          | NEG       | NEG        | POS         | NEG                      | POS                        |
| Riyadh-2553359                                               | POS                                                                                                                   | NEG             | POS        | POS                              | POS          | POS                                                          | NEG       | NEG        | POS         | NEG                      | POS                        |
| Riyadh-2571758                                               | POS                                                                                                                   | NEG             | POS        | POS                              | POS          | POS                                                          | NEG       | NEG        | POS         | AMB                      | POS                        |
| Riyadh-3029203                                               | POS                                                                                                                   | NEG             | POS        | POS                              | POS          | POS                                                          | NEG       | NEG        | POS         | NEG                      | POS                        |
| Riyadh-3039785                                               | POS                                                                                                                   | NEG             | POS        | POS                              | POS          | POS                                                          | NEG       | NEG        | POS         | NEG                      | POS                        |
| Riyadh-3105594                                               | POS                                                                                                                   | NEG             | POS        | POS                              | POS          | POS                                                          | NEG       | NEG        | POS         | NEG                      | POS                        |
| Riyadh_IC_204-2                                              | POS                                                                                                                   | NEG             | POS        | POS                              | POS          | POS                                                          | AMB       | NEG        | POS         | AMB                      | POS                        |
| Riyadh-3003974                                               | POS                                                                                                                   | NEG             | POS        | POS                              | POS          | POS                                                          | NEG       | NEG        | POS         | NEG                      | POS                        |
| Riyadh_IC_067                                                | POS                                                                                                                   | NEG             | POS        | POS                              | POS          | POS                                                          | NEG       | NEG        | POS         | NEG                      | POS                        |
| Riyadh-2988627                                               | POS                                                                                                                   | NEG             | POS        | POS                              | POS          | POS                                                          | NEG       | NEG        | POS         | NEG                      | POS                        |
| Riyadh-3112581                                               | POS                                                                                                                   | NEG             | POS        | POS                              | POS          | POS                                                          | NEG       | NEG        | POS         | NEG                      | POS                        |
| <b>CC22-MRSA-IV [PVL+]</b>                                   | POS                                                                                                                   | NEG             | POS        | POS                              | POS          | POS                                                          | NEG       | NEG        | POS         | NEG                      | POS                        |
| Riyadh-2781996-1                                             | POS                                                                                                                   | NEG             | POS        | POS                              | POS          | POS                                                          | NEG       | NEG        | POS         | NEG                      | POS                        |
| Riyadh-3103432                                               | POS                                                                                                                   | NEG             | POS        | POS                              | POS          | POS                                                          | NEG       | NEG        | POS         | NEG                      | POS                        |
| Riyadh-3028502                                               | POS                                                                                                                   | NEG             | POS        | POS                              | POS          | POS                                                          | NEG       | NEG        | POS         | NEG                      | POS                        |
| Riyadh-3081378-2                                             | POS                                                                                                                   | NEG             | POS        | POS                              | POS          | POS                                                          | NEG       | NEG        | POS         | NEG                      | POS                        |
| Riyadh_IC_185                                                | POS                                                                                                                   | NEG             | POS        | POS                              | POS          | POS                                                          | AMB       | NEG        | POS         | NEG                      | POS                        |
| Riyadh_IC_204-1                                              | POS                                                                                                                   | NEG             | POS        | POS                              | POS          | POS                                                          | AMB       | NEG        | POS         | NEG                      | POS                        |
| Riyadh-3159371                                               | POS                                                                                                                   | NEG             | POS        | POS                              | POS          | POS                                                          | AMB       | NEG        | POS         | NEG                      | POS                        |
| Riyadh-2753975                                               | POS                                                                                                                   | NEG             | POS        | POS                              | POS          | POS                                                          | NEG       | NEG        | POS         | NEG                      | POS                        |
| Riyadh-2775605                                               | POS                                                                                                                   | NEG             | POS        | POS                              | POS          | POS                                                          | NEG       | NEG        | POS         | NEG                      | POS                        |
| Riyadh-2781996-2                                             | POS                                                                                                                   | NEG             | POS        | POS                              | POS          | POS                                                          | NEG       | NEG        | POS         | NEG                      | POS                        |
| Riyadh-2822783-2                                             | POS                                                                                                                   | NEG             | POS        | POS                              | POS          | POS                                                          | NEG       | NEG        | POS         | NEG                      | POS                        |
| Riyadh-2876001                                               | POS                                                                                                                   | NEG             | POS        | POS                              | POS          | POS                                                          | NEG       | NEG        | POS         | NEG                      | POS                        |
| Riyadh-3036074                                               | POS                                                                                                                   | NEG             | POS        | POS                              | POS          | POS                                                          | AMB       | NEG        | POS         | AMB                      | POS                        |
| Riyadh-3053099                                               | POS                                                                                                                   | NEG             | POS        | POS                              | POS          | POS                                                          | NEG       | NEG        | POS         | NEG                      | POS                        |
| Riyadh-3055366                                               | POS                                                                                                                   | NEG             | POS        | POS                              | POS          | POS                                                          | NEG       | NEG        | POS         | NEG                      | POS                        |
| Riyadh-3082712                                               | POS                                                                                                                   | NEG             | POS        | POS                              | POS          | POS                                                          | NEG       | NEG        | POS         | NEG                      | POS                        |
| Riyadh-6087502                                               | POS                                                                                                                   | NEG             | POS        | POS                              | POS          | POS                                                          | NEG       | NEG        | POS         | NEG                      | POS                        |
| Riyadh-6                                                     | POS                                                                                                                   | NEG             | POS        | POS                              | POS          | POS                                                          | NEG       | NEG        | POS         | NEG                      | POS                        |
| Riyadh-7                                                     | POS                                                                                                                   | NEG             | POS        | POS                              | POS          | POS                                                          | NEG       | NEG        | POS         | NEG                      | POS                        |
| Riyadh-8                                                     | POS                                                                                                                   | NEG             | POS        | POS                              | POS          | POS                                                          | NEG       | NEG        | POS         | NEG                      | POS                        |
| <b>CC30-MRSA-IV [PVL+], Southwest Pacific Clone</b>          | NEG                                                                                                                   | NEG             | NEG        | NEG                              | POS          | POS                                                          | NEG       | NEG        | NEG         | POS                      | NEG                        |
| Riyadh-10                                                    | NEG                                                                                                                   | NEG             | NEG        | NEG                              | POS          | POS                                                          | NEG       | NEG        | NEG         | POS                      | NEG                        |
| Riyadh_IC_123                                                | NEG                                                                                                                   | NEG             | NEG        | NEG                              | POS          | POS                                                          | NEG       | NEG        | NEG         | POS                      | NEG                        |
| Riyadh-3080713                                               | NEG                                                                                                                   | NEG             | NEG        | NEG                              | POS          | POS                                                          | NEG       | NEG        | NEG         | POS                      | NEG                        |
| Riyadh-2803856                                               | NEG                                                                                                                   | NEG             | NEG        | NEG                              | POS          | POS                                                          | NEG       | NEG        | NEG         | POS                      | NEG                        |
| Riyadh-2817276-1                                             | NEG                                                                                                                   | NEG             | NEG        | NEG                              | POS          | POS                                                          | NEG       | NEG        | NEG         | POS                      | NEG                        |
| Riyadh-2817571-2                                             | NEG                                                                                                                   | NEG             | NEG        | NEG                              | POS          | POS                                                          | NEG       | NEG        | NEG         | POS                      | NEG                        |
| Riyadh-3033868                                               | NEG                                                                                                                   | NEG             | NEG        | NEG                              | POS          | POS                                                          | NEG       | NEG        | NEG         | AMB                      | NEG                        |
| Riyadh-2550100                                               | NEG                                                                                                                   | NEG             | NEG        | NEG                              | POS          | POS                                                          | NEG       | NEG        | NEG         | POS                      | NEG                        |
| Riyadh-3095056-2                                             | NEG                                                                                                                   | NEG             | NEG        | NEG                              | POS          | POS                                                          | NEG       | NEG        | NEG         | AMB                      | NEG                        |
| Riyadh-2819899                                               | NEG                                                                                                                   | NEG             | NEG        | NEG                              | POS          | POS                                                          | NEG       | NEG        | NEG         | POS                      | NEG                        |
| Riyadh-2821805                                               | NEG                                                                                                                   | NEG             | NEG        | NEG                              | POS          | POS                                                          | NEG       | NEG        | NEG         | NEG                      | NEG                        |
| Riyadh-3013928                                               | NEG                                                                                                                   | NEG             | NEG        | NEG                              | POS          | POS                                                          | NEG       | NEG        | NEG         | AMB                      | NEG                        |
| Riyadh-3029402                                               | NEG                                                                                                                   | NEG             | NEG        | NEG                              | POS          | POS                                                          | NEG       | NEG        | NEG         | AMB                      | POS                        |
| <b>CC45/agr IV-MRSA-IV, WA MRSA-23</b>                       | POS                                                                                                                   | NEG             | POS        | POS                              | POS          | POS                                                          | POS       | NEG        | NEG         | AMB                      | NEG                        |
| Riyadh-3081378-1                                             | POS                                                                                                                   | NEG             | POS        | POS                              | POS          | POS                                                          | POS       | NEG        | NEG         | AMB                      | NEG                        |
| <b>CC80-MRSA-IV</b>                                          | POS                                                                                                                   | NEG             | POS        | POS                              | POS          | POS                                                          | NEG       | POS        | NEG         | NEG                      | POS                        |
| Riyadh-3107635                                               | POS                                                                                                                   | NEG             | POS        | POS                              | POS          | POS                                                          | NEG       | POS        | NEG         | NEG                      | POS                        |
| Riyadh-2987458                                               | POS                                                                                                                   | NEG             | POS        | POS                              | POS          | POS                                                          | NEG       | POS        | NEG         | NEG                      | POS                        |
| <b>CC80-MRSA-IV [PVL+], European caMRSA Clone</b>            | POS                                                                                                                   | NEG             | POS        | POS                              | POS          | POS                                                          | NEG       | POS        | NEG         | NEG                      | POS                        |
| Riyadh-2988048                                               | POS                                                                                                                   | NEG             | POS        | POS                              | POS          | POS                                                          | NEG       | POS        | NEG         | NEG                      | POS                        |
| Riyadh-2990585-2                                             | POS                                                                                                                   | NEG             | POS        | POS                              | POS          | POS                                                          | NEG       | POS        | NEG         | NEG                      | POS                        |
| Riyadh-2990585-1                                             | POS                                                                                                                   | NEG             | POS        | POS                              | POS          | POS                                                          | NEG       | POS        | NEG         | NEG                      | POS                        |
| Riyadh-2826033                                               | POS                                                                                                                   | NEG             | POS        | POS                              | POS          | POS                                                          | AMB       | NEG        | NEG         | NEG                      | POS                        |
| Riyadh-1601562                                               | POS                                                                                                                   | NEG             | POS        | POS                              | POS          | POS                                                          | NEG       | NEG        | NEG         | NEG                      | POS                        |
| Riyadh-2569940                                               | POS                                                                                                                   | NEG             | POS        | POS                              | POS          | POS                                                          | NEG       | POS        | NEG         | NEG                      | POS                        |
| Riyadh-2571692                                               | POS                                                                                                                   | NEG             | POS        | POS                              | POS          | POS                                                          | AMB       | POS        | NEG         | NEG                      | POS                        |
| Riyadh-2763029                                               | POS                                                                                                                   | NEG             | POS        | POS                              | POS          | POS                                                          | NEG       | POS        | NEG         | NEG                      | POS                        |
| Riyadh-2767090                                               | POS                                                                                                                   | NEG             | POS        | POS                              | POS          | POS                                                          | NEG       | POS        | NEG         | NEG                      | POS                        |
| Riyadh-2775130                                               | POS                                                                                                                   | NEG             | POS        | POS                              | POS          | POS                                                          | NEG       | POS        | NEG         | NEG                      | POS                        |
| Riyadh-2778256                                               | POS                                                                                                                   | NEG             | POS        | POS                              | POS          | POS                                                          | NEG       | POS        | NEG         | NEG                      | POS                        |
| Riyadh-2817505                                               | POS                                                                                                                   | NEG             | POS        | POS                              | POS          | POS                                                          | AMB       | POS        | NEG         | NEG                      | POS                        |
| Riyadh-3024912                                               | POS                                                                                                                   | NEG             | POS        | POS                              | POS          | POS                                                          | NEG       | POS        | NEG         | NEG                      | POS                        |
| Riyadh-2788690                                               | POS                                                                                                                   | NEG             | POS        | POS                              | POS          | POS                                                          | NEG       | POS        | NEG         | NEG                      | POS                        |
| Riyadh-3829034                                               | POS                                                                                                                   | NEG             | POS        | POS                              | POS          | POS                                                          | AMB       | POS        | NEG         | NEG                      | POS                        |
| Riyadh-3                                                     | POS                                                                                                                   | NEG             | POS        | POS                              | POS          | POS                                                          | NEG       | POS        | NEG         | NEG                      | POS                        |
| Riyadh-5                                                     | POS                                                                                                                   | NEG             | POS        | POS                              | POS          | POS                                                          | NEG       | POS        | NEG         | NEG                      | POS                        |
| Riyadh-2553167                                               | POS                                                                                                                   | NEG             | POS        | POS                              | POS          | POS                                                          | NEG       | POS        | NEG         | NEG                      | POS                        |
| Riyadh-3002592                                               | POS                                                                                                                   | NEG             | POS        | POS                              | POS          | POS                                                          | AMB       | POS        | NEG         | NEG                      | POS                        |
| <b>CC88-MRSA-IV [PVL+]</b>                                   | POS                                                                                                                   | NEG             | POS        | POS                              | POS          | POS                                                          | NEG       | NEG        | POS         | POS                      | POS                        |
| Riyadh-2736996                                               | POS                                                                                                                   | NEG             | POS        | POS                              | POS          | POS                                                          | NEG       | NEG        | POS         | POS                      | POS                        |
| Riyadh-2942396                                               | POS                                                                                                                   | NEG             | POS        | POS                              | POS          | POS                                                          | AMB       | NEG        | POS         | POS                      | POS                        |
| Riyadh-3105391                                               | POS                                                                                                                   | NEG             | POS        | POS                              | POS          | POS                                                          | NEG       | NEG        | POS         | POS                      | POS                        |
| <b>CC97-MRSA-V</b>                                           | POS                                                                                                                   | POS             | NEG        | POS                              | POS          | POS                                                          | NEG       | NEG        | POS         | POS                      | POS                        |
| Riyadh-0297622                                               | POS                                                                                                                   | POS             | NEG        | POS                              | POS          | POS                                                          | NEG       | NEG        | POS         | POS                      | POS                        |
| Riyadh-3025471                                               | POS                                                                                                                   | POS             | NEG        | POS                              | POS          | POS                                                          | NEG       | NEG        | POS         | POS                      | POS                        |

|                                                          | ADHAESION FACTORS / GENES ENCODING MICROBIAL SURFACE COMPONENTS RECOGNIZING ADHESIVE MATRIX MOLECULES (MSCRAMM GENES) |             |                |             |              |                                       |            |               |              |            |             |
|----------------------------------------------------------|-----------------------------------------------------------------------------------------------------------------------|-------------|----------------|-------------|--------------|---------------------------------------|------------|---------------|--------------|------------|-------------|
|                                                          | sdrD (total)                                                                                                          | sdrD (cons) | sdrD (COL+MW2) | sdrD (Mu50) | sdrD (other) | vwb (total)                           | vwb (cons) | vwb (COL+MW2) | vwb (MRS252) | vwb (Mu50) | vwb (RF122) |
|                                                          | Ser-Asp rich fibrinogen-/bone sialoprotein-binding protein D                                                          |             |                |             |              | van Willebrand factor binding protein |            |               |              |            |             |
| <b>CC1-MRSA-IV&amp;SCCFus, WA MRSA-1/45</b>              |                                                                                                                       |             |                |             |              |                                       |            |               |              |            |             |
| Riyadh-3108609                                           | POS                                                                                                                   | POS         | POS            | NEG         | NEG          | POS                                   | POS        | POS           | NEG          | NEG        | NEG         |
| Riyadh-2913235                                           | POS                                                                                                                   | POS         | POS            | NEG         | NEG          | POS                                   | POS        | POS           | NEG          | NEG        | NEG         |
| <b>CC1/ST772-MRSA-V [PVL+], "Bengal Bay Clone/WA 1"</b>  |                                                                                                                       |             |                |             |              |                                       |            |               |              |            |             |
| Riyadh-2819026                                           | POS                                                                                                                   | POS         | NEG            | NEG         | POS          | POS                                   | POS        | NEG           | NEG          | NEG        | NEG         |
| <b>CC5-MRSA-IV, Paediatric clone</b>                     |                                                                                                                       |             |                |             |              |                                       |            |               |              |            |             |
| Riyadh-2915327-1                                         | POS                                                                                                                   | POS         | NEG            | POS         | NEG          | POS                                   | POS        | NEG           | NEG          | POS        | NEG         |
| Riyadh-2915327-2                                         | POS                                                                                                                   | POS         | NEG            | POS         | NEG          | POS                                   | POS        | NEG           | NEG          | POS        | NEG         |
| Riyadh-2                                                 | POS                                                                                                                   | POS         | NEG            | POS         | NEG          | POS                                   | POS        | NEG           | NEG          | POS        | NEG         |
| <b>CC5-MRSA-IV [PVL+], Paediatric clone</b>              |                                                                                                                       |             |                |             |              |                                       |            |               |              |            |             |
| Riyadh-2986666                                           | POS                                                                                                                   | POS         | NEG            | POS         | NEG          | POS                                   | POS        | NEG           | NEG          | POS        | NEG         |
| Riyadh-2913235                                           | POS                                                                                                                   | POS         | NEG            | POS         | NEG          | POS                                   | POS        | NEG           | NEG          | POS        | NEG         |
| <b>CC5-MRSA-IVvar, "Maltese Clone"</b>                   |                                                                                                                       |             |                |             |              |                                       |            |               |              |            |             |
| Riyadh-2983654                                           | POS                                                                                                                   | POS         | NEG            | POS         | NEG          | POS                                   | POS        | NEG           | NEG          | POS        | NEG         |
| Riyadh-4                                                 | POS                                                                                                                   | POS         | NEG            | POS         | NEG          | POS                                   | POS        | NEG           | NEG          | POS        | NEG         |
| Riyadh-2790233                                           | POS                                                                                                                   | POS         | NEG            | POS         | NEG          | POS                                   | POS        | NEG           | NEG          | POS        | NEG         |
| <b>CC5-MRSA-V</b>                                        |                                                                                                                       |             |                |             |              |                                       |            |               |              |            |             |
| Riyadh-2568944                                           | POS                                                                                                                   | POS         | NEG            | POS         | NEG          | POS                                   | POS        | NEG           | NEG          | POS        | NEG         |
| <b>CC6-MRSA-IV, WA MRSA-51/66</b>                        |                                                                                                                       |             |                |             |              |                                       |            |               |              |            |             |
| Riyadh-2556168                                           | POS                                                                                                                   | POS         | NEG            | POS         | NEG          | POS                                   | POS        | NEG           | POS          | NEG        | NEG         |
| Riyadh-2824507                                           | POS                                                                                                                   | POS         | NEG            | POS         | NEG          | POS                                   | POS        | NEG           | POS          | NEG        | NEG         |
| Riyadh-2990831                                           | POS                                                                                                                   | POS         | NEG            | POS         | NEG          | POS                                   | POS        | NEG           | POS          | NEG        | NEG         |
| <b>CC9/ST239-MRSA-III, Vienna/Hungarian/Brazilian Cl</b> |                                                                                                                       |             |                |             |              |                                       |            |               |              |            |             |
| Riyadh-2                                                 | POS                                                                                                                   | POS         | POS            | NEG         | NEG          | POS                                   | POS        | POS           | NEG          | NEG        | NEG         |
| Riyadh-3028763                                           | POS                                                                                                                   | POS         | POS            | NEG         | NEG          | POS                                   | POS        | POS           | NEG          | NEG        | NEG         |
| Riyadh-2817437                                           | POS                                                                                                                   | POS         | POS            | NEG         | NEG          | POS                                   | POS        | POS           | NEG          | NEG        | NEG         |
| Riyadh-2793706                                           | POS                                                                                                                   | POS         | POS            | NEG         | NEG          | POS                                   | POS        | POS           | NEG          | NEG        | NEG         |
| Riyadh-2818797                                           | POS                                                                                                                   | POS         | POS            | NEG         | NEG          | POS                                   | POS        | POS           | NEG          | NEG        | NEG         |
| Riyadh-2822825                                           | POS                                                                                                                   | POS         | POS            | NEG         | NEG          | POS                                   | POS        | POS           | NEG          | NEG        | NEG         |
| Riyadh-2888905                                           | POS                                                                                                                   | POS         | POS            | NEG         | NEG          | POS                                   | POS        | POS           | NEG          | NEG        | NEG         |
| Riyadh-2888915                                           | POS                                                                                                                   | POS         | POS            | NEG         | NEG          | POS                                   | POS        | POS           | NEG          | NEG        | NEG         |
| Riyadh-2567782                                           | POS                                                                                                                   | POS         | POS            | NEG         | NEG          | POS                                   | POS        | POS           | NEG          | NEG        | NEG         |
| Riyadh-2891670                                           | POS                                                                                                                   | POS         | POS            | NEG         | NEG          | POS                                   | POS        | POS           | NEG          | NEG        | NEG         |
| Riyadh-3006920                                           | POS                                                                                                                   | POS         | POS            | NEG         | NEG          | POS                                   | POS        | POS           | NEG          | NEG        | NEG         |
| Riyadh-281276-1                                          | POS                                                                                                                   | POS         | POS            | NEG         | NEG          | POS                                   | POS        | POS           | NEG          | NEG        | NEG         |
| Riyadh-0295102                                           | POS                                                                                                                   | POS         | POS            | NEG         | NEG          | POS                                   | POS        | POS           | NEG          | NEG        | NEG         |
| Riyadh-2820597                                           | POS                                                                                                                   | POS         | POS            | NEG         | NEG          | POS                                   | POS        | POS           | NEG          | NEG        | NEG         |
| Riyadh-2822088                                           | POS                                                                                                                   | POS         | POS            | NEG         | NEG          | POS                                   | POS        | POS           | NEG          | NEG        | NEG         |
| Riyadh-3010092                                           | POS                                                                                                                   | POS         | POS            | NEG         | NEG          | POS                                   | POS        | POS           | NEG          | NEG        | NEG         |
| Riyadh-3022844                                           | POS                                                                                                                   | POS         | POS            | NEG         | NEG          | POS                                   | POS        | POS           | NEG          | NEG        | NEG         |
| Riyadh-3108214-2                                         | POS                                                                                                                   | POS         | POS            | NEG         | NEG          | POS                                   | POS        | POS           | NEG          | NEG        | NEG         |
| Riyadh-2823926                                           | POS                                                                                                                   | POS         | POS            | NEG         | NEG          | POS                                   | POS        | POS           | NEG          | NEG        | NEG         |
| Riyadh-1                                                 | POS                                                                                                                   | POS         | POS            | NEG         | NEG          | POS                                   | POS        | POS           | NEG          | NEG        | NEG         |
| Riyadh-2818388                                           | POS                                                                                                                   | POS         | POS            | NEG         | NEG          | POS                                   | POS        | POS           | NEG          | NEG        | NEG         |
| Riyadh-3112115                                           | POS                                                                                                                   | POS         | POS            | NEG         | NEG          | NEG                                   | NEG        | NEG           | NEG          | NEG        | NEG         |
| <b>CC9/ST834-MRSA-(atypical SCCmec)</b>                  |                                                                                                                       |             |                |             |              |                                       |            |               |              |            |             |
| Riyadh-3103521                                           | POS                                                                                                                   | POS         | NEG            | NEG         | POS          | POS                                   | POS        | POS           | NEG          | NEG        | NEG         |
| <b>CC22-MRSA-IV, Barnim/UK-EMRSA-15</b>                  |                                                                                                                       |             |                |             |              |                                       |            |               |              |            |             |
| Riyadh-2553350                                           | POS                                                                                                                   | POS         | NEG            | NEG         | POS          | POS                                   | POS        | NEG           | NEG          | NEG        | POS         |
| Riyadh-2571758                                           | POS                                                                                                                   | POS         | NEG            | NEG         | POS          | POS                                   | POS        | NEG           | NEG          | NEG        | POS         |
| Riyadh-3029203                                           | POS                                                                                                                   | POS         | NEG            | NEG         | POS          | POS                                   | POS        | NEG           | NEG          | NEG        | POS         |
| Riyadh-3039785                                           | POS                                                                                                                   | POS         | NEG            | NEG         | POS          | POS                                   | POS        | NEG           | NEG          | NEG        | POS         |
| Riyadh-3105594                                           | POS                                                                                                                   | POS         | NEG            | NEG         | POS          | POS                                   | POS        | NEG           | NEG          | NEG        | POS         |
| Riyadh_IC_204-2                                          | POS                                                                                                                   | POS         | NEG            | NEG         | POS          | POS                                   | POS        | NEG           | NEG          | NEG        | POS         |
| Riyadh-3003974                                           | POS                                                                                                                   | POS         | NEG            | NEG         | POS          | POS                                   | POS        | NEG           | NEG          | NEG        | POS         |
| Riyadh_IC_067                                            | POS                                                                                                                   | POS         | NEG            | NEG         | POS          | POS                                   | POS        | NEG           | NEG          | NEG        | POS         |
| Riyadh-2988627                                           | POS                                                                                                                   | POS         | NEG            | NEG         | POS          | POS                                   | POS        | NEG           | NEG          | NEG        | POS         |
| Riyadh-3112581                                           | POS                                                                                                                   | POS         | NEG            | NEG         | POS          | POS                                   | POS        | NEG           | NEG          | NEG        | POS         |
| <b>CC22-MRSA-IV [PVL+]</b>                               |                                                                                                                       |             |                |             |              |                                       |            |               |              |            |             |
| Riyadh-2781996-1                                         | POS                                                                                                                   | POS         | NEG            | NEG         | POS          | POS                                   | POS        | NEG           | NEG          | NEG        | POS         |
| Riyadh-3103432                                           | POS                                                                                                                   | POS         | NEG            | NEG         | POS          | POS                                   | POS        | NEG           | NEG          | NEG        | POS         |
| Riyadh-3028502                                           | POS                                                                                                                   | POS         | NEG            | NEG         | POS          | POS                                   | POS        | NEG           | NEG          | NEG        | POS         |
| Riyadh-3081378-2                                         | POS                                                                                                                   | POS         | NEG            | NEG         | POS          | POS                                   | POS        | NEG           | NEG          | NEG        | POS         |
| Riyadh_IC_185                                            | POS                                                                                                                   | POS         | NEG            | NEG         | POS          | POS                                   | POS        | NEG           | NEG          | NEG        | POS         |
| Riyadh_IC_204-1                                          | POS                                                                                                                   | POS         | NEG            | NEG         | POS          | POS                                   | POS        | NEG           | NEG          | NEG        | POS         |
| Riyadh-3559371                                           | POS                                                                                                                   | POS         | NEG            | NEG         | POS          | POS                                   | POS        | NEG           | NEG          | NEG        | POS         |
| Riyadh-2753975                                           | POS                                                                                                                   | POS         | NEG            | NEG         | POS          | POS                                   | POS        | NEG           | NEG          | NEG        | POS         |
| Riyadh-2775605                                           | POS                                                                                                                   | POS         | NEG            | NEG         | POS          | POS                                   | POS        | NEG           | NEG          | NEG        | POS         |
| Riyadh-2781996-2                                         | POS                                                                                                                   | POS         | NEG            | NEG         | POS          | POS                                   | POS        | NEG           | NEG          | NEG        | POS         |
| Riyadh-2823783-2                                         | POS                                                                                                                   | POS         | NEG            | NEG         | POS          | POS                                   | POS        | NEG           | NEG          | NEG        | POS         |
| Riyadh-287601                                            | POS                                                                                                                   | POS         | NEG            | NEG         | POS          | POS                                   | POS        | NEG           | NEG          | NEG        | POS         |
| Riyadh-3036074                                           | POS                                                                                                                   | POS         | NEG            | NEG         | POS          | POS                                   | POS        | NEG           | NEG          | NEG        | POS         |
| Riyadh-3053099                                           | POS                                                                                                                   | POS         | NEG            | NEG         | POS          | POS                                   | POS        | NEG           | NEG          | NEG        | POS         |
| Riyadh-3055366                                           | POS                                                                                                                   | POS         | NEG            | NEG         | POS          | POS                                   | POS        | NEG           | NEG          | NEG        | POS         |
| Riyadh-3087712                                           | POS                                                                                                                   | POS         | NEG            | NEG         | POS          | POS                                   | POS        | NEG           | NEG          | NEG        | POS         |
| Riyadh-3087502                                           | POS                                                                                                                   | POS         | NEG            | NEG         | POS          | POS                                   | POS        | NEG           | NEG          | NEG        | POS         |
| Riyadh-6                                                 | POS                                                                                                                   | POS         | NEG            | NEG         | POS          | POS                                   | POS        | NEG           | NEG          | NEG        | POS         |
| Riyadh-7                                                 | POS                                                                                                                   | POS         | NEG            | NEG         | POS          | POS                                   | POS        | NEG           | NEG          | NEG        | POS         |
| Riyadh-8                                                 | POS                                                                                                                   | POS         | NEG            | NEG         | POS          | POS                                   | POS        | NEG           | NEG          | NEG        | POS         |
| <b>CC30-MRSA-IV [PVL+], Southwest Pacific Clone</b>      |                                                                                                                       |             |                |             |              |                                       |            |               |              |            |             |
| Riyadh-10                                                | POS                                                                                                                   | POS         | NEG            | NEG         | POS          | POS                                   | POS        | NEG           | POS          | NEG        | NEG         |
| Riyadh_IC_123                                            | POS                                                                                                                   | POS         | NEG            | NEG         | POS          | POS                                   | POS        | NEG           | POS          | NEG        | NEG         |
| Riyadh-3080713                                           | POS                                                                                                                   | POS         | NEG            | NEG         | POS          | POS                                   | POS        | NEG           | POS          | NEG        | NEG         |
| Riyadh-2803856                                           | POS                                                                                                                   | POS         | NEG            | NEG         | POS          | POS                                   | POS        | NEG           | POS          | NEG        | NEG         |
| Riyadh-2817276-1                                         | POS                                                                                                                   | POS         | NEG            | NEG         | POS          | POS                                   | POS        | NEG           | POS          | NEG        | NEG         |
| Riyadh-2817571-2                                         | POS                                                                                                                   | POS         | NEG            | NEG         | POS          | POS                                   | POS        | NEG           | POS          | NEG        | NEG         |
| Riyadh-3033868                                           | POS                                                                                                                   | POS         | NEG            | NEG         | POS          | POS                                   | POS        | NEG           | POS          | NEG        | NEG         |
| Riyadh-2550108                                           | POS                                                                                                                   | POS         | NEG            | NEG         | POS          | POS                                   | POS        | NEG           | POS          | NEG        | NEG         |
| Riyadh-3095056-2                                         | POS                                                                                                                   | POS         | NEG            | NEG         | POS          | POS                                   | POS        | NEG           | POS          | NEG        | NEG         |
| Riyadh-2819899                                           | POS                                                                                                                   | POS         | NEG            | NEG         | POS          | POS                                   | POS        | NEG           | POS          | NEG        | NEG         |
| Riyadh-2821805                                           | POS                                                                                                                   | POS         | NEG            | NEG         | POS          | POS                                   | POS        | NEG           | POS          | NEG        | NEG         |
| Riyadh-3013928                                           | POS                                                                                                                   | POS         | NEG            | NEG         | POS          | POS                                   | POS        | NEG           | POS          | NEG        | NEG         |
| Riyadh-3029402                                           | POS                                                                                                                   | POS         | NEG            | NEG         | POS          | POS                                   | POS        | NEG           | POS          | NEG        | NEG         |
| <b>CC45/agr IV-MRSA-IV, WA MRSA-23</b>                   |                                                                                                                       |             |                |             |              |                                       |            |               |              |            |             |
| Riyadh-3081378-1                                         | POS                                                                                                                   | POS         | NEG            | NEG         | POS          | POS                                   | POS        | NEG           | NEG          | NEG        | NEG         |
| <b>CC80-MRSA-IV</b>                                      |                                                                                                                       |             |                |             |              |                                       |            |               |              |            |             |
| Riyadh-3107635                                           | POS                                                                                                                   | POS         | NEG            | NEG         | POS          | POS                                   | POS        | NEG           | POS          | NEG        | NEG         |
| Riyadh-2987458                                           | POS                                                                                                                   | POS         | NEG            | NEG         | POS          | POS                                   | POS        | NEG           | POS          | NEG        | NEG         |
| <b>CC80-MRSA-IV [PVL+], European caMRSA Clone</b>        |                                                                                                                       |             |                |             |              |                                       |            |               |              |            |             |
| Riyadh-2988048                                           | POS                                                                                                                   | POS         | NEG            | NEG         | POS          | POS                                   | POS        | NEG           | POS          | NEG        | NEG         |
| Riyadh-2990585-2                                         | POS                                                                                                                   | POS         | NEG            | NEG         | POS          | POS                                   | POS        | NEG           | POS          | NEG        | NEG         |
| Riyadh-2990585-1                                         | POS                                                                                                                   | POS         | NEG            | NEG         | POS          | POS                                   | POS        | NEG           | POS          | NEG        | NEG         |
| Riyadh-2826033                                           | NEG                                                                                                                   | NEG         | NEG            | NEG         | NEG          | POS                                   | POS        | NEG           | POS          | NEG        | NEG         |
| Riyadh-1601562                                           | NEG                                                                                                                   | NEG         | NEG            | NEG         | NEG          | POS                                   | POS        | NEG           | POS          | NEG        | NEG         |
| Riyadh-2569940                                           | POS                                                                                                                   | POS         | NEG            | NEG         | POS          | POS                                   | POS        | NEG           | POS          | NEG        | NEG         |
| Riyadh-2571692                                           | POS                                                                                                                   | POS         | NEG            | NEG         | POS          | POS                                   | POS        | NEG           | POS          | NEG        | NEG         |
| Riyadh-2763029                                           | POS                                                                                                                   | POS         | NEG            | NEG         | POS          | POS                                   | POS        | NEG           | POS          | NEG        | NEG         |
| Riyadh-2767090                                           | POS                                                                                                                   | POS         | NEG            | NEG         | POS          | POS                                   | POS        | NEG           | POS          | NEG        | NEG         |
| Riyadh-2775130                                           | POS                                                                                                                   | POS         | NEG            | NEG         | POS          | POS                                   | POS        | NEG           | POS          | NEG        | NEG         |
| Riyadh-2778256                                           | POS                                                                                                                   | POS         | NEG            | NEG         | POS          | POS                                   | POS        | NEG           | POS          | NEG        | NEG         |
| Riyadh-2817505                                           | POS                                                                                                                   | POS         | NEG            | NEG         | POS          | POS                                   | POS        | NEG           | POS          | NEG        | NEG         |
| Riyadh-3024912                                           | POS                                                                                                                   | POS         | NEG            | NEG         | POS          | POS                                   | POS        | NEG           | POS          | NEG        | NEG         |
| Riyadh-2788690                                           | POS                                                                                                                   | POS         | NEG            | NEG         | POS          | POS                                   | POS        | NEG           | POS          | NEG        | NEG         |
| Riyadh-3829034                                           | POS                                                                                                                   | POS         | NEG            | NEG         | POS          | POS                                   | POS        | NEG           | POS          | NEG        | NEG         |
| Riyadh-3                                                 | POS                                                                                                                   | POS         | NEG            | NEG         | POS          | POS                                   | POS        | NEG           | POS          | NEG        | NEG         |
| Riyadh-5                                                 | POS                                                                                                                   | POS         | NEG            | NEG         | POS          | POS                                   | POS        | NEG           | POS          | NEG        | NEG         |
| Riyadh-2553167                                           | POS                                                                                                                   | POS         | NEG            | NEG         | POS          | POS                                   | POS        | NEG           | POS          | NEG        | NEG         |
| Riyadh-3002592                                           | POS                                                                                                                   | POS         | NEG            | NEG         | POS          | POS                                   | POS        | NEG           | POS          | NEG        | NEG         |
| <b>CC88-MRSA-IV [PVL+]</b>                               |                                                                                                                       |             |                |             |              |                                       |            |               |              |            |             |
| Riyadh-2736996                                           | POS                                                                                                                   | POS         | NEG            | NEG         | POS          | POS                                   | POS        | NEG           | NEG          | POS        | NEG         |
| Riyadh-2942396                                           | POS                                                                                                                   | POS         | NEG            | NEG         | POS          | POS                                   | POS        | NEG           | NEG          | POS        | NEG         |
| Riyadh-3105391                                           | POS                                                                                                                   | POS         | NEG            | NEG         | POS          | POS                                   | POS        | NEG           | NEG          | POS        | NEG         |
| <b>CC97-MRSA-V</b>                                       |                                                                                                                       |             |                |             |              |                                       |            |               |              |            |             |
| Riyadh-0297622                                           | POS                                                                                                                   | POS         | NEG            | POS         | NEG          | POS                                   | POS        | NEG           | NEG          | NEG        | POS         |
| Riyadh-3025471                                           | POS                                                                                                                   | POS         | NEG            | POS         | NEG          | POS                                   | POS        | NEG           | NEG          | NEG        | POS         |

|                                                          | IMMUNODOMINANT ANTIGEN B |                | DEFENSIN RESIST.            |                 | TRANSFERRIN BINDING PROTEIN |                |                           | PUTATIVE TRANSPORTER                                            |                       |              |              |
|----------------------------------------------------------|--------------------------|----------------|-----------------------------|-----------------|-----------------------------|----------------|---------------------------|-----------------------------------------------------------------|-----------------------|--------------|--------------|
|                                                          | isaB                     | isaB (MRSA252) | mprF (COL+MW2)              | mprF (Mu50+252) | IsdA (cons)                 | IsdA (MRSA252) | IsdA (Other Than MRSA252) | ImrP (OtherThan F122)                                           | ImrP (OtherThan F122) | ImrP (RF122) | ImrP (RF122) |
|                                                          | immunodominant antigen B |                | defensin resistance protein |                 | transferrin-binding protein |                |                           | hypothetical protein, similar to integral membrane protein ImrP |                       |              |              |
| <b>CC1-MRSA-IV&amp;SCCFus, WA MRSA-1/45</b>              |                          |                |                             |                 |                             |                |                           |                                                                 |                       |              |              |
| Riyadh-3108609                                           | POS                      | AMB            | POS                         | AMB             | POS                         | AMB            | POS                       | POS                                                             | POS                   | NEG          | NEG          |
| Riyadh-2913235                                           | POS                      | AMB            | POS                         | AMB             | POS                         | AMB            | POS                       | POS                                                             | POS                   | NEG          | NEG          |
| <b>CC1/ST772-MRSA-V [PVL+], "Bengal Bay Clone/WA1"</b>   |                          |                |                             |                 |                             |                |                           |                                                                 |                       |              |              |
| Riyadh-2819026                                           | POS                      | AMB            | POS                         | AMB             | POS                         | AMB            | POS                       | POS                                                             | POS                   | NEG          | NEG          |
| <b>CC5-MRSA-IV, Paediatric clone</b>                     |                          |                |                             |                 |                             |                |                           |                                                                 |                       |              |              |
| Riyadh-2915327-1                                         | POS                      | AMB            | AMB                         | POS             | POS                         | NEG            | POS                       | POS                                                             | POS                   | NEG          | NEG          |
| Riyadh-2915327-2                                         | POS                      | AMB            | AMB                         | POS             | POS                         | NEG            | POS                       | POS                                                             | POS                   | NEG          | NEG          |
| Riyadh-2                                                 | POS                      | AMB            | AMB                         | POS             | POS                         | AMB            | POS                       | POS                                                             | POS                   | NEG          | NEG          |
| <b>CC5-MRSA-IV [PVL+], Paediatric clone</b>              |                          |                |                             |                 |                             |                |                           |                                                                 |                       |              |              |
| Riyadh-2986666                                           | POS                      | AMB            | POS                         | AMB             | POS                         | AMB            | POS                       | POS                                                             | POS                   | NEG          | NEG          |
| Riyadh-2913235                                           | POS                      | AMB            | POS                         | AMB             | POS                         | AMB            | POS                       | POS                                                             | POS                   | NEG          | NEG          |
| <b>CC5-MRSA-IVvar, "Maltese Clone"</b>                   |                          |                |                             |                 |                             |                |                           |                                                                 |                       |              |              |
| Riyadh-2983654                                           | POS                      | AMB            | POS                         | AMB             | POS                         | AMB            | POS                       | POS                                                             | POS                   | NEG          | NEG          |
| Riyadh-4                                                 | POS                      | AMB            | POS                         | AMB             | POS                         | AMB            | POS                       | POS                                                             | POS                   | NEG          | NEG          |
| Riyadh-2790233                                           | POS                      | AMB            | POS                         | AMB             | POS                         | NEG            | POS                       | POS                                                             | POS                   | NEG          | NEG          |
| <b>CC5-MRSA-V</b>                                        |                          |                |                             |                 |                             |                |                           |                                                                 |                       |              |              |
| Riyadh-2568944                                           | POS                      | AMB            | AMB                         | POS             | POS                         | AMB            | POS                       | POS                                                             | POS                   | NEG          | NEG          |
| <b>CC6-MRSA-IV, WA MRSA-51/66</b>                        |                          |                |                             |                 |                             |                |                           |                                                                 |                       |              |              |
| Riyadh-2556168                                           | POS                      | AMB            | POS                         | AMB             | POS                         | AMB            | POS                       | POS                                                             | POS                   | NEG          | NEG          |
| Riyadh-2824507                                           | POS                      | AMB            | POS                         | AMB             | POS                         | NEG            | POS                       | POS                                                             | POS                   | NEG          | NEG          |
| Riyadh-2990831                                           | POS                      | AMB            | POS                         | AMB             | POS                         | AMB            | POS                       | POS                                                             | POS                   | NEG          | NEG          |
| <b>CC9/ST239-MRSA-III, Vienna/Hungarian/Brazilian Cl</b> |                          |                |                             |                 |                             |                |                           |                                                                 |                       |              |              |
| Riyadh-9                                                 | AMB                      | POS            | POS                         | AMB             | POS                         | AMB            | POS                       | POS                                                             | POS                   | NEG          | NEG          |
| Riyadh-3028763                                           | NEG                      | POS            | POS                         | AMB             | POS                         | AMB            | POS                       | POS                                                             | POS                   | NEG          | NEG          |
| Riyadh-2817437                                           | AMB                      | POS            | POS                         | AMB             | POS                         | AMB            | POS                       | POS                                                             | POS                   | NEG          | NEG          |
| Riyadh-2793706                                           | NEG                      | POS            | POS                         | AMB             | POS                         | AMB            | POS                       | POS                                                             | POS                   | NEG          | NEG          |
| Riyadh-2818797                                           | AMB                      | POS            | POS                         | AMB             | POS                         | AMB            | POS                       | POS                                                             | POS                   | NEG          | NEG          |
| Riyadh-2822825                                           | AMB                      | POS            | POS                         | AMB             | POS                         | AMB            | POS                       | POS                                                             | POS                   | NEG          | NEG          |
| Riyadh-2888905                                           | AMB                      | POS            | POS                         | AMB             | POS                         | AMB            | POS                       | POS                                                             | POS                   | NEG          | NEG          |
| Riyadh-2888915                                           | AMB                      | POS            | POS                         | AMB             | POS                         | AMB            | POS                       | POS                                                             | POS                   | NEG          | NEG          |
| Riyadh-2567782                                           | NEG                      | POS            | POS                         | AMB             | POS                         | AMB            | POS                       | POS                                                             | POS                   | NEG          | NEG          |
| Riyadh-2891670                                           | AMB                      | POS            | POS                         | AMB             | POS                         | AMB            | POS                       | POS                                                             | POS                   | NEG          | NEG          |
| Riyadh-3006920                                           | NEG                      | POS            | POS                         | AMB             | POS                         | AMB            | POS                       | POS                                                             | POS                   | NEG          | NEG          |
| Riyadh-2817276-1                                         | AMB                      | POS            | POS                         | AMB             | POS                         | AMB            | POS                       | POS                                                             | POS                   | NEG          | NEG          |
| Riyadh-0295102                                           | NEG                      | POS            | POS                         | AMB             | POS                         | AMB            | POS                       | POS                                                             | POS                   | NEG          | NEG          |
| Riyadh-2820597                                           | AMB                      | POS            | POS                         | AMB             | POS                         | AMB            | POS                       | POS                                                             | POS                   | NEG          | NEG          |
| Riyadh-2822088                                           | AMB                      | POS            | POS                         | AMB             | POS                         | AMB            | POS                       | POS                                                             | POS                   | NEG          | NEG          |
| Riyadh-3010092                                           | NEG                      | POS            | POS                         | AMB             | POS                         | AMB            | POS                       | POS                                                             | POS                   | NEG          | NEG          |
| Riyadh-3022844                                           | NEG                      | POS            | POS                         | AMB             | POS                         | AMB            | POS                       | POS                                                             | POS                   | NEG          | NEG          |
| Riyadh-3108214-2                                         | NEG                      | POS            | POS                         | AMB             | POS                         | NEG            | POS                       | POS                                                             | POS                   | NEG          | NEG          |
| Riyadh-2823926                                           | NEG                      | POS            | POS                         | AMB             | POS                         | AMB            | POS                       | POS                                                             | POS                   | NEG          | NEG          |
| Riyadh-1                                                 | AMB                      | POS            | POS                         | AMB             | POS                         | AMB            | POS                       | POS                                                             | POS                   | NEG          | NEG          |
| Riyadh-2818388                                           | NEG                      | POS            | POS                         | AMB             | POS                         | AMB            | POS                       | POS                                                             | POS                   | NEG          | NEG          |
| Riyadh-3112115                                           | NEG                      | POS            | POS                         | AMB             | POS                         | AMB            | POS                       | POS                                                             | POS                   | NEG          | NEG          |
| <b>CC9/ST834-MRSA-(atypical SCCmec)</b>                  |                          |                |                             |                 |                             |                |                           |                                                                 |                       |              |              |
| Riyadh-3103521                                           | POS                      | AMB            | POS                         | AMB             | POS                         | AMB            | POS                       | POS                                                             | POS                   | NEG          | NEG          |
| <b>CC22-MRSA-IV, Barnim/UK-EMRSA-15</b>                  |                          |                |                             |                 |                             |                |                           |                                                                 |                       |              |              |
| Riyadh-2553350                                           | AMB                      | POS            | AMB                         | POS             | POS                         | AMB            | POS                       | POS                                                             | POS                   | NEG          | NEG          |
| Riyadh-2571758                                           | AMB                      | POS            | POS                         | AMB             | POS                         | AMB            | POS                       | POS                                                             | POS                   | NEG          | NEG          |
| Riyadh-3029203                                           | NEG                      | POS            | POS                         | AMB             | POS                         | AMB            | POS                       | POS                                                             | POS                   | NEG          | NEG          |
| Riyadh-3039785                                           | NEG                      | POS            | AMB                         | POS             | POS                         | AMB            | POS                       | POS                                                             | POS                   | NEG          | NEG          |
| Riyadh-3105594                                           | NEG                      | POS            | POS                         | AMB             | POS                         | AMB            | POS                       | POS                                                             | POS                   | NEG          | NEG          |
| Riyadh_IC_204-2                                          | AMB                      | POS            | POS                         | AMB             | POS                         | AMB            | POS                       | POS                                                             | POS                   | NEG          | NEG          |
| Riyadh-3003974                                           | NEG                      | POS            | POS                         | AMB             | POS                         | AMB            | POS                       | POS                                                             | POS                   | #ZAH11       | NEG          |
| Riyadh_IC_067                                            | NEG                      | POS            | POS                         | AMB             | POS                         | AMB            | POS                       | POS                                                             | POS                   | NEG          | NEG          |
| Riyadh-2988627                                           | AMB                      | POS            | POS                         | AMB             | POS                         | AMB            | POS                       | POS                                                             | POS                   | NEG          | NEG          |
| Riyadh-3112581                                           | NEG                      | POS            | AMB                         | POS             | POS                         | AMB            | POS                       | POS                                                             | POS                   | NEG          | NEG          |
| <b>CC22-MRSA-IV [PVL+]</b>                               |                          |                |                             |                 |                             |                |                           |                                                                 |                       |              |              |
| Riyadh-2781996-1                                         | NEG                      | POS            | POS                         | AMB             | POS                         | NEG            | POS                       | POS                                                             | POS                   | NEG          | NEG          |
| Riyadh-3103432                                           | NEG                      | POS            | POS                         | AMB             | POS                         | AMB            | POS                       | POS                                                             | POS                   | NEG          | NEG          |
| Riyadh-3026502                                           | NEG                      | POS            | AMB                         | POS             | POS                         | NEG            | POS                       | POS                                                             | POS                   | NEG          | NEG          |
| Riyadh-3081378-2                                         | NEG                      | POS            | AMB                         | POS             | POS                         | AMB            | POS                       | POS                                                             | POS                   | NEG          | NEG          |
| Riyadh_IC_185                                            | NEG                      | POS            | POS                         | AMB             | POS                         | AMB            | POS                       | POS                                                             | POS                   | NEG          | NEG          |
| Riyadh_IC_204-1                                          | AMB                      | POS            | POS                         | AMB             | POS                         | AMB            | POS                       | POS                                                             | POS                   | NEG          | NEG          |
| Riyadh-3159371                                           | AMB                      | POS            | POS                         | AMB             | POS                         | AMB            | POS                       | POS                                                             | POS                   | NEG          | NEG          |
| Riyadh-2753975                                           | NEG                      | POS            | POS                         | AMB             | POS                         | AMB            | POS                       | POS                                                             | POS                   | NEG          | NEG          |
| Riyadh-2775605                                           | NEG                      | POS            | POS                         | POS             | POS                         | NEG            | POS                       | POS                                                             | POS                   | NEG          | NEG          |
| Riyadh-2781996-2                                         | NEG                      | POS            | AMB                         | POS             | POS                         | NEG            | POS                       | POS                                                             | POS                   | NEG          | NEG          |
| Riyadh-2781996-3                                         | NEG                      | POS            | POS                         | POS             | POS                         | AMB            | POS                       | POS                                                             | POS                   | NEG          | NEG          |
| Riyadh-2765601                                           | NEG                      | POS            | AMB                         | POS             | POS                         | AMB            | POS                       | POS                                                             | POS                   | NEG          | NEG          |
| Riyadh-3036074                                           | AMB                      | POS            | POS                         | AMB             | POS                         | AMB            | POS                       | POS                                                             | POS                   | NEG          | NEG          |
| Riyadh-3053099                                           | NEG                      | POS            | POS                         | AMB             | POS                         | AMB            | POS                       | POS                                                             | POS                   | NEG          | NEG          |
| Riyadh-3055366                                           | NEG                      | POS            | AMB                         | POS             | POS                         | AMB            | POS                       | POS                                                             | POS                   | NEG          | NEG          |
| Riyadh-3087712                                           | NEG                      | POS            | POS                         | AMB             | POS                         | AMB            | POS                       | POS                                                             | POS                   | NEG          | NEG          |
| Riyadh-2987502                                           | NEG                      | POS            | AMB                         | POS             | POS                         | NEG            | POS                       | POS                                                             | POS                   | NEG          | NEG          |
| Riyadh-6                                                 | NEG                      | POS            | AMB                         | POS             | POS                         | NEG            | POS                       | POS                                                             | POS                   | NEG          | NEG          |
| Riyadh-7                                                 | AMB                      | POS            | AMB                         | POS             | POS                         | AMB            | POS                       | POS                                                             | POS                   | NEG          | NEG          |
| Riyadh-8                                                 | NEG                      | POS            | AMB                         | POS             | POS                         | AMB            | POS                       | POS                                                             | POS                   | NEG          | NEG          |
| <b>CC30-MRSA-IV [PVL+], Southwest Pacific Clone</b>      |                          |                |                             |                 |                             |                |                           |                                                                 |                       |              |              |
| Riyadh-10                                                | AMB                      | POS            | AMB                         | POS             | POS                         | NEG            | POS                       | POS                                                             | POS                   | NEG          | NEG          |
| Riyadh_IC_123                                            | AMB                      | POS            | AMB                         | AMB             | POS                         | POS            | NEG                       | POS                                                             | POS                   | NEG          | NEG          |
| Riyadh-2980713                                           | NEG                      | POS            | POS                         | AMB             | POS                         | POS            | NEG                       | POS                                                             | POS                   | NEG          | NEG          |
| Riyadh-2803856                                           | NEG                      | POS            | POS                         | AMB             | POS                         | POS            | NEG                       | POS                                                             | POS                   | NEG          | NEG          |
| Riyadh-2817276-1                                         | AMB                      | POS            | POS                         | AMB             | POS                         | POS            | AMB                       | POS                                                             | POS                   | NEG          | NEG          |
| Riyadh-2817571-2                                         | AMB                      | POS            | POS                         | AMB             | POS                         | POS            | AMB                       | POS                                                             | POS                   | NEG          | NEG          |
| Riyadh-3033868                                           | NEG                      | POS            | AMB                         | POS             | POS                         | NEG            | POS                       | POS                                                             | POS                   | NEG          | NEG          |
| Riyadh-2550108                                           | NEG                      | POS            | AMB                         | POS             | POS                         | NEG            | POS                       | POS                                                             | POS                   | NEG          | NEG          |
| Riyadh-3095056-2                                         | NEG                      | POS            | AMB                         | POS             | POS                         | NEG            | POS                       | POS                                                             | POS                   | NEG          | NEG          |
| Riyadh-2819899                                           | NEG                      | POS            | AMB                         | POS             | POS                         | NEG            | POS                       | POS                                                             | POS                   | NEG          | NEG          |
| Riyadh-2821805                                           | NEG                      | POS            | AMB                         | POS             | POS                         | NEG            | POS                       | POS                                                             | POS                   | NEG          | NEG          |
| Riyadh-3013928                                           | NEG                      | POS            | POS                         | AMB             | POS                         | NEG            | POS                       | POS                                                             | POS                   | NEG          | NEG          |
| Riyadh-3029402                                           | NEG                      | POS            | POS                         | AMB             | POS                         | NEG            | POS                       | POS                                                             | POS                   | NEG          | NEG          |
| <b>CC45/agr IV-MRSA-IV, WA MRSA-23</b>                   |                          |                |                             |                 |                             |                |                           |                                                                 |                       |              |              |
| Riyadh-3081378-1                                         | NEG                      | POS            | NEG                         | POS             | POS                         | POS            | NEG                       | NEG                                                             | NEG                   | POS          | POS          |
| <b>CC80-MRSA-IV</b>                                      |                          |                |                             |                 |                             |                |                           |                                                                 |                       |              |              |
| Riyadh-3107635                                           | POS                      | AMB            | POS                         | AMB             | POS                         | AMB            | POS                       | POS                                                             | POS                   | NEG          | NEG          |
| Riyadh-2987458                                           | POS                      | AMB            | POS                         | AMB             | POS                         | AMB            | POS                       | POS                                                             | POS                   | NEG          | NEG          |
| <b>CC80-MRSA-IV [PVL+], European caMRSA Clone</b>        |                          |                |                             |                 |                             |                |                           |                                                                 |                       |              |              |
| Riyadh-2988048                                           | POS                      | AMB            | AMB                         | POS             | POS                         | NEG            | POS                       | POS                                                             | POS                   | NEG          | NEG          |
| Riyadh-2990585-2                                         | POS                      | AMB            | POS                         | AMB             | POS                         | NEG            | POS                       | POS                                                             | POS                   | NEG          | NEG          |
| Riyadh-2990585-1                                         | POS                      | AMB            | POS                         | AMB             | POS                         | AMB            | POS                       | POS                                                             | POS                   | NEG          | NEG          |
| Riyadh-2826033                                           | POS                      | AMB            | POS                         | AMB             | POS                         | AMB            | POS                       | POS                                                             | POS                   | NEG          | NEG          |
| Riyadh-1601562                                           | POS                      | AMB            | POS                         | AMB             | POS                         | AMB            | POS                       | POS                                                             | POS                   | NEG          | NEG          |
| Riyadh-2569940                                           | AMB                      | POS            | POS                         | AMB             | POS                         | AMB            | POS                       | POS                                                             | POS                   | NEG          | NEG          |
| Riyadh-2571692                                           | POS                      | AMB            | POS                         | AMB             | POS                         | AMB            | POS                       | POS                                                             | POS                   | NEG          | NEG          |
| Riyadh-2763029                                           | POS                      | AMB            | POS                         | AMB             | POS                         | AMB            | POS                       | POS                                                             | POS                   | NEG          | NEG          |
| Riyadh-2767090                                           | POS                      | AMB            | POS                         | AMB             | POS                         | AMB            | POS                       | POS                                                             | POS                   | NEG          | NEG          |
| Riyadh-2775130                                           | AMB                      | POS            | POS                         | AMB             | POS                         | NEG            | POS                       | POS                                                             | POS                   | NEG          | NEG          |
| Riyadh-2778256                                           | POS                      | AMB            | POS                         | AMB             | POS                         | AMB            | POS                       | POS                                                             | POS                   | NEG          | NEG          |
| Riyadh-2817505                                           | POS                      | AMB            | POS                         | AMB             | POS                         | AMB            | POS                       | POS                                                             | POS                   | NEG          | NEG          |
| Riyadh-3024912                                           | POS                      | AMB            | POS                         | AMB             | POS                         | AMB            | POS                       | POS                                                             | POS                   | NEG          | NEG          |
| Riyadh-2788690                                           | POS                      | AMB            | POS                         | AMB             | POS                         | AMB            | POS                       | POS                                                             | POS                   | NEG          | NEG          |
| Riyadh-2829034                                           | POS                      | AMB            | POS                         | AMB             | POS                         | AMB            | POS                       | POS                                                             | POS                   | NEG          | NEG          |
| Riyadh-3                                                 | POS                      | AMB            | POS                         | AMB             | POS                         | AMB            | POS                       | POS                                                             | POS                   | NEG          | NEG          |
| Riyadh-5                                                 | POS                      | AMB            | POS                         | AMB             | POS                         | AMB            | POS                       | POS                                                             | POS                   | NEG          | NEG          |
| Riyadh-2553167                                           | POS                      | AMB            | AMB                         | POS             | POS                         | AMB            | POS                       | POS                                                             | POS                   | NEG          | NEG          |
| Riyadh-3002592                                           | POS                      | AMB            | POS                         | AMB             | POS                         | AMB            | POS                       | POS                                                             | POS                   | NEG          | NEG          |
| <b>CC88-MRSA-IV [PVL+]</b>                               |                          |                |                             |                 |                             |                |                           |                                                                 |                       |              |              |
| Riyadh-2736996                                           | POS                      | AMB            | POS                         | AMB             | POS                         | AMB            | POS                       | POS                                                             | POS                   | NEG          | NEG          |
| Riyadh-2942396                                           | POS                      | AMB            | POS                         | AMB             | POS                         | AMB            | POS                       | POS                                                             | POS                   | NEG          | NEG          |
| Riyadh-3105391                                           | POS                      | AMB            | POS                         | AMB             | POS                         | NEG            | POS                       | POS                                                             | POS                   | NEG          | NEG          |
| <b>CC97-MRSA-V</b>                                       |                          |                |                             |                 |                             |                |                           |                                                                 |                       |              |              |
| Riyadh-0297622                                           | POS                      | AMB            | POS                         | AMB             | POS                         | AMB            | POS                       | POS                                                             | POS                   | NEG          | NEG          |
| Riyadh-3025471                                           | POS                      | AMB            | POS                         | AMB             | POS                         | AMB            | POS                       | POS                                                             | POS                   | NEG          | NEG          |

|                                                          | TYPE I RESTRICTION-MODIFICATION SYSTEM, SINGLE SEQUENCE SPECIFICITY PROTEIN |                                                           |                 |               |                | TYPE I RESTRICTION-MODIFICATION SYSTEM, SINGLE SEQUENCE SPECIFICITY PROTEIN |                       |                    |                      |                |                                                               |              |             |
|----------------------------------------------------------|-----------------------------------------------------------------------------|-----------------------------------------------------------|-----------------|---------------|----------------|-----------------------------------------------------------------------------|-----------------------|--------------------|----------------------|----------------|---------------------------------------------------------------|--------------|-------------|
|                                                          | hsdS1 (RF122)                                                               | hsdS2 (ST5+ST8)                                           | hsdS2 (MW2+476) | hsdS2 (RF122) | hsdS2 (MRS252) | hsdS3 (all other than RF122+MRS252)                                         | hsdS3 (ST8+ST1+RF122) | hsdS3 (Mu50+ N315) | hsdS3 (CC51+ MRS252) | hsdS3 (MRS252) | hsdSx (CC25)                                                  | hsdSx (CC15) | hsdSx (eta) |
|                                                          | type I site-specific deoxyribonuclease subunit, 1st locus                   | type I site-specific deoxyribonuclease subunit, 2nd locus |                 |               |                | type I site-specific deoxyribonuclease subunit, 3rd locus                   |                       |                    |                      |                | type I site-specific deoxyribonuclease subunit, unknown locus |              |             |
| <b>CC1-MRSA-IV&amp;SCCFus, WA MRSA-1/45</b>              | NEG                                                                         | NEG                                                       | POS             | NEG           | NEG            | POS                                                                         | POS                   | NEG                | NEG                  | NEG            | POS                                                           | NEG          | NEG         |
| Riyadh-3108609                                           | NEG                                                                         | NEG                                                       | POS             | NEG           | NEG            | POS                                                                         | POS                   | NEG                | NEG                  | NEG            | POS                                                           | NEG          | NEG         |
| <b>CC1/ST772-MRSA-V [PVL+], "Bengal Bay Clone/WA I"</b>  | NEG                                                                         | NEG                                                       | POS             | NEG           | NEG            | POS                                                                         | NEG                   | NEG                | NEG                  | NEG            | POS                                                           | POS          | NEG         |
| Riyadh-2819026                                           | NEG                                                                         | NEG                                                       | POS             | NEG           | NEG            | POS                                                                         | NEG                   | NEG                | NEG                  | NEG            | POS                                                           | POS          | NEG         |
| <b>CC5-MRSA-IV, Paediatric clone</b>                     | NEG                                                                         | POS                                                       | AMB             | NEG           | NEG            | POS                                                                         | NEG                   | POS                | NEG                  | NEG            | POS                                                           | AMB          | NEG         |
| Riyadh-2915327-1                                         | NEG                                                                         | POS                                                       | AMB             | NEG           | NEG            | POS                                                                         | NEG                   | POS                | NEG                  | NEG            | POS                                                           | AMB          | NEG         |
| Riyadh-2915327-2                                         | NEG                                                                         | POS                                                       | AMB             | NEG           | NEG            | POS                                                                         | NEG                   | POS                | NEG                  | NEG            | POS                                                           | AMB          | NEG         |
| Riyadh-2                                                 | NEG                                                                         | NEG                                                       | AMB             | NEG           | NEG            | POS                                                                         | NEG                   | POS                | AMB                  | NEG            | POS                                                           | AMB          | NEG         |
| <b>CC5-MRSA-IV [PVL+], Paediatric clone</b>              | NEG                                                                         | POS                                                       | AMB             | NEG           | NEG            | POS                                                                         | NEG                   | POS                | NEG                  | NEG            | POS                                                           | AMB          | NEG         |
| Riyadh-2986666                                           | NEG                                                                         | POS                                                       | AMB             | NEG           | NEG            | POS                                                                         | NEG                   | POS                | NEG                  | NEG            | POS                                                           | AMB          | NEG         |
| Riyadh-2913335                                           | NEG                                                                         | POS                                                       | AMB             | NEG           | NEG            | POS                                                                         | NEG                   | POS                | NEG                  | NEG            | POS                                                           | AMB          | NEG         |
| <b>CC5-MRSA-IVvar, "Maltese Clone"</b>                   | NEG                                                                         | POS                                                       | AMB             | NEG           | NEG            | POS                                                                         | NEG                   | POS                | NEG                  | NEG            | POS                                                           | AMB          | NEG         |
| Riyadh-2983654                                           | NEG                                                                         | POS                                                       | AMB             | NEG           | NEG            | POS                                                                         | NEG                   | POS                | NEG                  | NEG            | POS                                                           | AMB          | NEG         |
| Riyadh-4                                                 | NEG                                                                         | POS                                                       | AMB             | NEG           | NEG            | POS                                                                         | NEG                   | POS                | NEG                  | NEG            | POS                                                           | AMB          | NEG         |
| Riyadh-2790233                                           | NEG                                                                         | POS                                                       | AMB             | NEG           | NEG            | POS                                                                         | NEG                   | POS                | NEG                  | NEG            | POS                                                           | AMB          | NEG         |
| <b>CC5-MRSA-V</b>                                        | NEG                                                                         | POS                                                       | AMB             | NEG           | NEG            | POS                                                                         | NEG                   | POS                | NEG                  | NEG            | POS                                                           | AMB          | NEG         |
| Riyadh-2568944                                           | NEG                                                                         | POS                                                       | AMB             | NEG           | NEG            | POS                                                                         | NEG                   | POS                | NEG                  | NEG            | POS                                                           | AMB          | NEG         |
| <b>CC6-MRSA-IV, WA MRSA-51/66</b>                        | NEG                                                                         | NEG                                                       | NEG             | NEG           | NEG            | POS                                                                         | POS                   | NEG                | POS                  | NEG            | POS                                                           | AMB          | NEG         |
| Riyadh-2556168                                           | NEG                                                                         | NEG                                                       | NEG             | NEG           | NEG            | POS                                                                         | POS                   | NEG                | POS                  | NEG            | POS                                                           | AMB          | NEG         |
| Riyadh-2824507                                           | NEG                                                                         | NEG                                                       | AMB             | NEG           | NEG            | POS                                                                         | POS                   | NEG                | POS                  | NEG            | POS                                                           | AMB          | NEG         |
| Riyadh-3990831                                           | NEG                                                                         | NEG                                                       | NEG             | NEG           | NEG            | POS                                                                         | POS                   | NEG                | POS                  | NEG            | POS                                                           | AMB          | NEG         |
| <b>CC9/ST239-MRSA-III, Vienna/Hungarian/Brazilian Cl</b> | NEG                                                                         | NEG                                                       | AMB             | NEG           | NEG            | POS                                                                         | POS                   | NEG                | NEG                  | NEG            | POS                                                           | NEG          | NEG         |
| Riyadh-5                                                 | NEG                                                                         | NEG                                                       | AMB             | NEG           | NEG            | POS                                                                         | POS                   | NEG                | NEG                  | NEG            | POS                                                           | NEG          | NEG         |
| Riyadh-3028763                                           | NEG                                                                         | POS                                                       | POS             | NEG           | NEG            | POS                                                                         | POS                   | NEG                | NEG                  | NEG            | POS                                                           | NEG          | NEG         |
| Riyadh-2817437                                           | NEG                                                                         | POS                                                       | POS             | NEG           | NEG            | POS                                                                         | POS                   | NEG                | NEG                  | NEG            | POS                                                           | NEG          | NEG         |
| Riyadh-2793706                                           | NEG                                                                         | POS                                                       | AMB             | NEG           | NEG            | POS                                                                         | POS                   | NEG                | NEG                  | NEG            | POS                                                           | NEG          | NEG         |
| Riyadh-2817977                                           | NEG                                                                         | POS                                                       | POS             | NEG           | NEG            | POS                                                                         | POS                   | NEG                | NEG                  | NEG            | POS                                                           | AMB          | NEG         |
| Riyadh-2822825                                           | NEG                                                                         | POS                                                       | AMB             | NEG           | NEG            | POS                                                                         | POS                   | NEG                | NEG                  | NEG            | POS                                                           | NEG          | NEG         |
| Riyadh-2888905                                           | NEG                                                                         | POS                                                       | AMB             | NEG           | NEG            | POS                                                                         | POS                   | NEG                | NEG                  | NEG            | POS                                                           | NEG          | NEG         |
| Riyadh-2888915                                           | NEG                                                                         | POS                                                       | AMB             | NEG           | NEG            | POS                                                                         | POS                   | NEG                | NEG                  | NEG            | POS                                                           | NEG          | NEG         |
| Riyadh-2567782                                           | NEG                                                                         | POS                                                       | AMB             | NEG           | NEG            | POS                                                                         | POS                   | NEG                | NEG                  | NEG            | POS                                                           | NEG          | NEG         |
| Riyadh-2891670                                           | NEG                                                                         | POS                                                       | POS             | NEG           | NEG            | POS                                                                         | POS                   | NEG                | NEG                  | NEG            | POS                                                           | NEG          | NEG         |
| Riyadh-3006920                                           | NEG                                                                         | POS                                                       | AMB             | NEG           | NEG            | POS                                                                         | POS                   | NEG                | NEG                  | NEG            | POS                                                           | NEG          | NEG         |
| Riyadh-2817276-1                                         | NEG                                                                         | POS                                                       | AMB             | NEG           | NEG            | POS                                                                         | POS                   | NEG                | NEG                  | NEG            | POS                                                           | NEG          | NEG         |
| Riyadh-0295102                                           | NEG                                                                         | POS                                                       | AMB             | NEG           | NEG            | POS                                                                         | POS                   | NEG                | NEG                  | NEG            | POS                                                           | NEG          | NEG         |
| Riyadh-2820597                                           | NEG                                                                         | POS                                                       | POS             | NEG           | NEG            | POS                                                                         | POS                   | NEG                | NEG                  | NEG            | POS                                                           | NEG          | NEG         |
| Riyadh-2822088                                           | NEG                                                                         | POS                                                       | POS             | NEG           | NEG            | POS                                                                         | POS                   | NEG                | NEG                  | NEG            | POS                                                           | NEG          | NEG         |
| Riyadh-3010092                                           | NEG                                                                         | POS                                                       | AMB             | NEG           | NEG            | POS                                                                         | POS                   | NEG                | NEG                  | NEG            | POS                                                           | NEG          | NEG         |
| Riyadh-3022844                                           | NEG                                                                         | POS                                                       | AMB             | NEG           | NEG            | POS                                                                         | POS                   | NEG                | NEG                  | NEG            | POS                                                           | NEG          | NEG         |
| Riyadh-3108214-2                                         | NEG                                                                         | POS                                                       | AMB             | NEG           | NEG            | POS                                                                         | POS                   | NEG                | NEG                  | NEG            | POS                                                           | NEG          | NEG         |
| Riyadh-2823926                                           | NEG                                                                         | POS                                                       | POS             | NEG           | NEG            | POS                                                                         | POS                   | NEG                | NEG                  | NEG            | POS                                                           | NEG          | NEG         |
| Riyadh-1                                                 | NEG                                                                         | POS                                                       | AMB             | NEG           | NEG            | POS                                                                         | POS                   | NEG                | NEG                  | NEG            | POS                                                           | NEG          | NEG         |
| Riyadh-2818388                                           | NEG                                                                         | POS                                                       | POS             | NEG           | NEG            | POS                                                                         | POS                   | NEG                | NEG                  | NEG            | POS                                                           | NEG          | NEG         |
| Riyadh-3113315                                           | NEG                                                                         | POS                                                       | AMB             | NEG           | NEG            | POS                                                                         | POS                   | NEG                | NEG                  | NEG            | POS                                                           | NEG          | NEG         |
| <b>CC9/ST834-MRSA-(atypical SCCmec)</b>                  | NEG                                                                         | NEG                                                       | POS             | NEG           | NEG            | NEG                                                                         | NEG                   | NEG                | NEG                  | NEG            | NEG                                                           | NEG          | NEG         |
| Riyadh-3103521                                           | NEG                                                                         | NEG                                                       | POS             | NEG           | NEG            | NEG                                                                         | NEG                   | NEG                | NEG                  | NEG            | NEG                                                           | NEG          | NEG         |
| <b>CC22-MRSA-IV, Barnim/UK-EMRSA-15</b>                  | NEG                                                                         | POS                                                       | NEG             | NEG           | NEG            | AMB                                                                         | NEG                   | NEG                | NEG                  | NEG            | POS                                                           | AMB          | NEG         |
| Riyadh-2553350                                           | NEG                                                                         | POS                                                       | NEG             | NEG           | NEG            | AMB                                                                         | NEG                   | NEG                | NEG                  | NEG            | POS                                                           | AMB          | NEG         |
| Riyadh-2571758                                           | NEG                                                                         | POS                                                       | AMB             | NEG           | NEG            | POS                                                                         | NEG                   | NEG                | NEG                  | NEG            | POS                                                           | NEG          | NEG         |
| Riyadh-3029203                                           | NEG                                                                         | POS                                                       | POS             | NEG           | NEG            | AMB                                                                         | NEG                   | NEG                | NEG                  | NEG            | POS                                                           | AMB          | NEG         |
| Riyadh-3039785                                           | NEG                                                                         | POS                                                       | POS             | NEG           | NEG            | AMB                                                                         | NEG                   | NEG                | NEG                  | NEG            | POS                                                           | AMB          | NEG         |
| Riyadh-3105594                                           | NEG                                                                         | POS                                                       | AMB             | NEG           | NEG            | POS                                                                         | NEG                   | NEG                | NEG                  | NEG            | POS                                                           | AMB          | NEG         |
| Riyadh_IC_204-2                                          | NEG                                                                         | POS                                                       | AMB             | NEG           | NEG            | POS                                                                         | NEG                   | NEG                | NEG                  | NEG            | POS                                                           | AMB          | NEG         |
| Riyadh-3003974                                           | NEG                                                                         | POS                                                       | POS             | NEG           | NEG            | POS                                                                         | NEG                   | NEG                | NEG                  | NEG            | POS                                                           | AMB          | NEG         |
| Riyadh_IC_067                                            | NEG                                                                         | POS                                                       | AMB             | NEG           | NEG            | POS                                                                         | NEG                   | NEG                | NEG                  | NEG            | POS                                                           | AMB          | NEG         |
| Riyadh-2988627                                           | NEG                                                                         | POS                                                       | AMB             | NEG           | NEG            | AMB                                                                         | NEG                   | NEG                | NEG                  | NEG            | POS                                                           | AMB          | NEG         |
| Riyadh-3112581                                           | NEG                                                                         | POS                                                       | AMB             | NEG           | NEG            | NEG                                                                         | NEG                   | NEG                | NEG                  | NEG            | POS                                                           | NEG          | NEG         |
| <b>CC22-MRSA-IV [PVL+]</b>                               | NEG                                                                         | POS                                                       | AMB             | NEG           | NEG            | NEG                                                                         | NEG                   | NEG                | NEG                  | NEG            | POS                                                           | AMB          | NEG         |
| Riyadh-2781996-1                                         | NEG                                                                         | POS                                                       | AMB             | NEG           | NEG            | NEG                                                                         | NEG                   | NEG                | NEG                  | NEG            | POS                                                           | AMB          | NEG         |
| Riyadh-3103432                                           | NEG                                                                         | POS                                                       | AMB             | NEG           | NEG            | NEG                                                                         | NEG                   | NEG                | NEG                  | NEG            | POS                                                           | AMB          | NEG         |
| Riyadh-3026502                                           | NEG                                                                         | POS                                                       | NEG             | NEG           | NEG            | NEG                                                                         | NEG                   | NEG                | NEG                  | NEG            | POS                                                           | AMB          | NEG         |
| Riyadh-3081378-2                                         | NEG                                                                         | POS                                                       | NEG             | NEG           | NEG            | AMB                                                                         | NEG                   | NEG                | NEG                  | NEG            | POS                                                           | NEG          | NEG         |
| Riyadh_IC_185                                            | NEG                                                                         | POS                                                       | AMB             | NEG           | NEG            | POS                                                                         | NEG                   | NEG                | NEG                  | NEG            | POS                                                           | AMB          | NEG         |
| Riyadh_IC_204-1                                          | NEG                                                                         | POS                                                       | AMB             | NEG           | NEG            | POS                                                                         | NEG                   | NEG                | NEG                  | NEG            | POS                                                           | AMB          | NEG         |
| Riyadh-1559371                                           | NEG                                                                         | POS                                                       | AMB             | NEG           | NEG            | POS                                                                         | NEG                   | NEG                | NEG                  | NEG            | POS                                                           | AMB          | NEG         |
| Riyadh-2753975                                           | NEG                                                                         | POS                                                       | AMB             | NEG           | NEG            | POS                                                                         | NEG                   | NEG                | NEG                  | NEG            | POS                                                           | AMB          | NEG         |
| Riyadh-2775605                                           | NEG                                                                         | POS                                                       | AMB             | NEG           | NEG            | NEG                                                                         | NEG                   | NEG                | NEG                  | NEG            | POS                                                           | NEG          | NEG         |
| Riyadh-2781996-2                                         | NEG                                                                         | POS                                                       | AMB             | NEG           | NEG            | NEG                                                                         | NEG                   | NEG                | NEG                  | NEG            | POS                                                           | NEG          | NEG         |
| Riyadh-2827878-2                                         | NEG                                                                         | POS                                                       | AMB             | NEG           | NEG            | AMB                                                                         | NEG                   | NEG                | NEG                  | NEG            | POS                                                           | AMB          | NEG         |
| Riyadh-2765601                                           | NEG                                                                         | POS                                                       | AMB             | NEG           | NEG            | AMB                                                                         | NEG                   | NEG                | NEG                  | NEG            | POS                                                           | AMB          | NEG         |
| Riyadh-3036074                                           | NEG                                                                         | POS                                                       | POS             | NEG           | NEG            | POS                                                                         | NEG                   | NEG                | NEG                  | NEG            | POS                                                           | AMB          | NEG         |
| Riyadh-3053099                                           | NEG                                                                         | POS                                                       | AMB             | NEG           | NEG            | AMB                                                                         | NEG                   | NEG                | NEG                  | NEG            | POS                                                           | AMB          | NEG         |
| Riyadh-3055366                                           | NEG                                                                         | POS                                                       | AMB             | NEG           | NEG            | NEG                                                                         | NEG                   | NEG                | NEG                  | NEG            | POS                                                           | AMB          | NEG         |
| Riyadh-3082712                                           | NEG                                                                         | POS                                                       | POS             | NEG           | NEG            | AMB                                                                         | NEG                   | NEG                | NEG                  | NEG            | POS                                                           | AMB          | NEG         |
| Riyadh-3087502                                           | NEG                                                                         | POS                                                       | NEG             | NEG           | NEG            | AMB                                                                         | NEG                   | NEG                | NEG                  | NEG            | POS                                                           | AMB          | NEG         |
| Riyadh-6                                                 | NEG                                                                         | POS                                                       | NEG             | NEG           | NEG            | AMB                                                                         | NEG                   | NEG                | NEG                  | NEG            | POS                                                           | AMB          | NEG         |
| Riyadh-7                                                 | NEG                                                                         | POS                                                       | NEG             | NEG           | NEG            | AMB                                                                         | NEG                   | NEG                | NEG                  | NEG            | POS                                                           | AMB          | NEG         |
| Riyadh-8                                                 | NEG                                                                         | POS                                                       | NEG             | NEG           | NEG            | AMB                                                                         | NEG                   | NEG                | NEG                  | NEG            | POS                                                           | AMB          | NEG         |
| <b>CC30-MRSA-IV [PVL+], Southwest Pacific Clone</b>      | NEG                                                                         | NEG                                                       | NEG             | NEG           | POS            | NEG                                                                         | NEG                   | NEG                | POS                  | POS            | POS                                                           | AMB          | NEG         |
| Riyadh-10                                                | NEG                                                                         | NEG                                                       | NEG             | NEG           | POS            | NEG                                                                         | NEG                   | NEG                | POS                  | POS            | POS                                                           | AMB          | NEG         |
| Riyadh_IC_123                                            | NEG                                                                         | NEG                                                       | AMB             | NEG           | POS            | NEG                                                                         | NEG                   | NEG                | POS                  | POS            | POS                                                           | AMB          | NEG         |
| Riyadh-3080713                                           | NEG                                                                         | NEG                                                       | AMB             | NEG           | POS            | NEG                                                                         | NEG                   | NEG                | POS                  | POS            | POS                                                           | AMB          | NEG         |
| Riyadh-2803856                                           | NEG                                                                         | NEG                                                       | POS             | NEG           | POS            | AMB                                                                         | NEG                   | NEG                | POS                  | POS            | POS                                                           | AMB          | NEG         |
| Riyadh-2817276-1                                         | NEG                                                                         | NEG                                                       | POS             | NEG           | POS            | POS                                                                         | NEG                   | NEG                | POS                  | POS            | POS                                                           | AMB          | NEG         |
| Riyadh-2817571-2                                         | NEG                                                                         | NEG                                                       | POS             | NEG           | POS            | AMB                                                                         | NEG                   | NEG                | POS                  | POS            | POS                                                           | AMB          | NEG         |
| Riyadh-3033868                                           | NEG                                                                         | NEG                                                       | AMB             | NEG           | POS            | NEG                                                                         | NEG                   | NEG                | POS                  | POS            | POS                                                           | AMB          | NEG         |
| Riyadh-2550100                                           | NEG                                                                         | NEG                                                       | NEG             | NEG           | POS            | NEG                                                                         | NEG                   | NEG                | POS                  | POS            | POS                                                           | AMB          | NEG         |
| Riyadh-3095056-2                                         | NEG                                                                         | NEG                                                       | AMB             | NEG           | POS            | NEG                                                                         | NEG                   | NEG                | POS                  | POS            | POS                                                           | AMB          | NEG         |
| Riyadh-2819899                                           | NEG                                                                         | NEG                                                       | POS             | NEG           | POS            | NEG                                                                         | NEG                   | NEG                | POS                  | POS            | POS                                                           | AMB          | NEG         |
| Riyadh-2821805                                           | NEG                                                                         | NEG                                                       | NEG             | NEG           | POS            | NEG                                                                         | NEG                   | NEG                | POS                  | POS            | POS                                                           | AMB          | NEG         |
| Riyadh-3013928                                           | NEG                                                                         | NEG                                                       | AMB             | NEG           | POS            | NEG                                                                         | NEG                   | NEG                | POS                  | POS            | POS                                                           | AMB          | NEG         |
| Riyadh-3029402                                           | NEG                                                                         | NEG                                                       | POS             | NEG           | POS            | NEG                                                                         | NEG                   | NEG                | POS                  | POS            | POS                                                           | AMB          | NEG         |
| <b>CC45/agr IV-MRSA-IV, WA MRSA-23</b>                   | NEG                                                                         | NEG                                                       | NEG             | NEG           | POS            | POS                                                                         | NEG                   | NEG                | POS                  | NEG            | AMB                                                           | AMB          | NEG         |
| Riyadh-3081378-1                                         | NEG                                                                         | NEG                                                       | NEG             | NEG           | POS            | POS                                                                         | NEG                   | NEG                | POS                  | NEG            | AMB                                                           | AMB          | NEG         |
| <b>CC80-MRSA-IV</b>                                      | NEG                                                                         | NEG                                                       | POS             | NEG           | NEG            | NEG                                                                         | NEG                   | NEG                | NEG                  | NEG            | NEG                                                           | AMB          | POS         |
| Riyadh-3107635                                           | NEG                                                                         | NEG                                                       | POS             | NEG           | NEG            | NEG                                                                         | NEG                   | NEG                | NEG                  | NEG            | NEG                                                           | AMB          | POS         |
| Riyadh-2987458                                           | NEG                                                                         | NEG                                                       | AMB             | NEG           | NEG            | NEG                                                                         | NEG                   | NEG                | NEG                  | NEG            | NEG                                                           | AMB          | POS         |
| <b>CC80-MRSA-IV [PVL+], European caMRSA Clone</b>        | NEG                                                                         | NEG                                                       | POS             | NEG           | NEG            | NEG                                                                         | NEG                   | NEG                | NEG                  | NEG            | NEG                                                           | NEG          | POS         |
| Riyadh-2988048                                           | NEG                                                                         | NEG                                                       | POS             | NEG           | NEG            | NEG                                                                         | NEG                   | NEG                | NEG                  | NEG            | NEG                                                           | NEG          | POS         |
| Riyadh-2990585-2                                         | NEG                                                                         | NEG                                                       | AMB             | NEG           | NEG            | NEG                                                                         | NEG                   | NEG                | NEG                  | NEG            | NEG                                                           | AMB          | POS         |
| Riyadh-2990585-1                                         | NEG                                                                         | NEG                                                       | AMB             | NEG           | NEG            | NEG                                                                         | NEG                   | NEG                | NEG                  | NEG            | NEG                                                           | AMB          | POS         |
| Riyadh-2826033                                           | NEG                                                                         | NEG                                                       | AMB             | NEG           | NEG            | NEG                                                                         | NEG                   | NEG                | NEG                  | NEG            | NEG                                                           | AMB          | POS         |
| Riyadh-1601562                                           | NEG                                                                         | NEG                                                       | AMB             | NEG           | NEG            | NEG                                                                         | NEG                   | NEG                | NEG                  | NEG            | NEG                                                           | AMB          | POS         |
| Riyadh-2569940                                           | NEG                                                                         | NEG                                                       | POS             | NEG           | NEG            | NEG                                                                         | NEG                   | NEG                | NEG                  | NEG            | POS                                                           | POS          | POS         |
| Riyadh-2571692                                           | NEG                                                                         | NEG                                                       | POS             | NEG           | NEG            | NEG                                                                         | NEG                   | NEG                | NEG                  | NEG            | POS                                                           | POS          | POS         |
| Riyadh-2763029                                           | NEG                                                                         | NEG                                                       | AMB             | NEG           | NEG            | NEG                                                                         | NEG                   | NEG                | NEG                  | NEG            | AMB                                                           | POS          | POS         |
| Riyadh-2767090                                           | NEG                                                                         | NEG                                                       | AMB             | NEG           | NEG            | NEG                                                                         | NEG                   | NEG                | NEG                  | NEG            | AMB                                                           | POS          | POS         |
| Riyadh-2775130                                           | NEG                                                                         | NEG                                                       | AMB             | NEG           | NEG            | NEG                                                                         | NEG                   | NEG                | NEG                  | NEG            | NEG                                                           | AMB          | POS         |
| Riyadh-2778256                                           | NEG                                                                         | NEG                                                       | POS             | NEG           | NEG            | NEG                                                                         | NEG                   | NEG                | NEG                  | NEG            | NEG                                                           | AMB          | POS         |
| Riyadh-2817505                                           | NEG                                                                         | NEG                                                       | POS             | NEG           | NEG            | NEG                                                                         | NEG                   | NEG                | NEG                  | NEG            | AMB                                                           | AMB          | POS         |
| Riyadh-3024912                                           | NEG                                                                         | NEG                                                       | AMB             | NEG           | NEG            | NEG                                                                         | NEG                   | NEG                | NEG                  | NEG            | NEG                                                           | AMB          | POS         |
| Riyadh-2786590                                           | NEG                                                                         | NEG                                                       | AMB             | NEG           | NEG            | NEG                                                                         | NEG                   | NEG                | NEG                  | NEG            | AMB                                                           | AMB          | POS         |
| Riyadh-3292034                                           | NEG                                                                         | NEG                                                       | AMB             | NEG           | NEG            | NEG                                                                         | NEG                   | NEG                | NEG                  | NEG            | AMB                                                           | AMB          | POS         |
| Riyadh-3                                                 | NEG                                                                         | NEG                                                       | AMB             | NEG           | NEG            | NEG                                                                         | NEG                   | NEG                | NEG                  | NEG            | AMB                                                           | POS          | POS         |
| Riyadh-5                                                 | NEG                                                                         | NEG                                                       | POS             | NEG           | NEG            | NEG                                                                         | NEG                   | NEG                | NEG                  | NEG            | POS                                                           | POS          | POS         |
| Riyadh-2553167                                           | NEG                                                                         | NEG                                                       | AMB             | NEG           | NEG            | NEG                                                                         | NEG                   | NEG                | NEG                  | NEG            | AMB                                                           | AMB          | POS         |
| Riyadh-300259                                            |                                                                             |                                                           |                 |               |                |                                                                             |                       |                    |                      |                |                                                               |              |             |

|                                                          | MISCELLANEOUS GENES                                          |                               |                      | HYALURONATE LYASE                       |                                          |                                                 |                                 |                           |                                          |                                          |                |
|----------------------------------------------------------|--------------------------------------------------------------|-------------------------------|----------------------|-----------------------------------------|------------------------------------------|-------------------------------------------------|---------------------------------|---------------------------|------------------------------------------|------------------------------------------|----------------|
|                                                          | Q2FXC0                                                       | Q2YU83                        | Q7A4X2               | hysA1 (MRS252)                          | hysA1 (MRS252+RF12 2) and/or hysA2 (con) | hysA1 (MRS252+RF12 2) and/or hysA2 (COL-USA300) | hysA2 (all other than MRS252)   | hysA2 (COL-USA300+CTC825) | hysA2 (all other than COL-USA300+CTC825) | hysA2 (all other than COL-USA300+CTC825) | hysA2 (MRS252) |
|                                                          | hypothetical protein, located next to serine protease operon | Unspecific efflux/transporter | hypothetical protein | hyaluronate lyase, first / second locus |                                          |                                                 | hyaluronate lyase, second locus |                           |                                          |                                          |                |
| <b>CC1-MRSA-IV&amp;SCCFus, WA MRSA-1/45</b>              | POS                                                          | NEG                           | NEG                  | NEG                                     | POS                                      | NEG                                             | POS                             | NEG                       | POS                                      | POS                                      | NEG            |
| Riyadh-3108609                                           | POS                                                          | NEG                           | NEG                  | NEG                                     | POS                                      | NEG                                             | POS                             | NEG                       | POS                                      | POS                                      | NEG            |
| <b>CC1/ST772-MRSA-V [PVL+], "Bengal Bay Clone/WA I"</b>  | NEG                                                          | POS                           | POS                  | NEG                                     | POS                                      | NEG                                             | POS                             | NEG                       | POS                                      | POS                                      | NEG            |
| Riyadh-2819026                                           | NEG                                                          | POS                           | POS                  | NEG                                     | POS                                      | NEG                                             | POS                             | NEG                       | POS                                      | POS                                      | NEG            |
| <b>CC5-MRSA-IV, Paediatric clone</b>                     | NEG                                                          | AMB                           | POS                  | NEG                                     | POS                                      | NEG                                             | POS                             | NEG                       | POS                                      | POS                                      | AMB            |
| Riyadh-2915327-1                                         | NEG                                                          | AMB                           | POS                  | NEG                                     | POS                                      | NEG                                             | POS                             | NEG                       | POS                                      | POS                                      | AMB            |
| Riyadh-2915327-2                                         | NEG                                                          | NEG                           | POS                  | NEG                                     | POS                                      | NEG                                             | POS                             | NEG                       | POS                                      | POS                                      | NEG            |
| Riyadh-2                                                 | NEG                                                          | NEG                           | POS                  | NEG                                     | POS                                      | NEG                                             | POS                             | NEG                       | POS                                      | POS                                      | AMB            |
| <b>CC5-MRSA-IV [PVL+], Paediatric clone</b>              | NEG                                                          | AMB                           | POS                  | NEG                                     | POS                                      | NEG                                             | POS                             | NEG                       | POS                                      | POS                                      | AMB            |
| Riyadh-2986666                                           | NEG                                                          | AMB                           | POS                  | NEG                                     | POS                                      | NEG                                             | POS                             | NEG                       | POS                                      | POS                                      | AMB            |
| Riyadh-2913325                                           | NEG                                                          | AMB                           | POS                  | NEG                                     | POS                                      | NEG                                             | POS                             | NEG                       | POS                                      | POS                                      | NEG            |
| <b>CC5-MRSA-IVvar, "Maltese Clone"</b>                   | NEG                                                          | AMB                           | POS                  | NEG                                     | POS                                      | NEG                                             | POS                             | NEG                       | POS                                      | POS                                      | AMB            |
| Riyadh-2983654                                           | NEG                                                          | AMB                           | POS                  | NEG                                     | POS                                      | NEG                                             | POS                             | NEG                       | POS                                      | POS                                      | AMB            |
| Riyadh-4                                                 | NEG                                                          | NEG                           | POS                  | NEG                                     | POS                                      | NEG                                             | POS                             | NEG                       | POS                                      | POS                                      | NEG            |
| Riyadh-2790233                                           | NEG                                                          | AMB                           | POS                  | NEG                                     | POS                                      | NEG                                             | POS                             | NEG                       | POS                                      | POS                                      | NEG            |
| <b>CC5-MRSA-V</b>                                        | NEG                                                          | NEG                           | POS                  | NEG                                     | POS                                      | NEG                                             | POS                             | NEG                       | POS                                      | POS                                      | NEG            |
| Riyadh-2568944                                           | NEG                                                          | NEG                           | POS                  | NEG                                     | POS                                      | NEG                                             | POS                             | NEG                       | POS                                      | POS                                      | NEG            |
| <b>CC6-MRSA-IV, WA MRSA-51/66</b>                        | POS                                                          | NEG                           | NEG                  | NEG                                     | POS                                      | NEG                                             | NEG                             | NEG                       | POS                                      | POS                                      | NEG            |
| Riyadh-2556168                                           | POS                                                          | NEG                           | NEG                  | NEG                                     | POS                                      | NEG                                             | NEG                             | NEG                       | POS                                      | POS                                      | NEG            |
| Riyadh-2824507                                           | POS                                                          | NEG                           | NEG                  | NEG                                     | POS                                      | NEG                                             | NEG                             | NEG                       | POS                                      | POS                                      | NEG            |
| Riyadh-2990831                                           | POS                                                          | POS                           | NEG                  | NEG                                     | POS                                      | NEG                                             | NEG                             | NEG                       | POS                                      | POS                                      | NEG            |
| <b>CC9/ST239-MRSA-III, Vienna/Hungarian/Brazilian Cl</b> | POS                                                          | NEG                           | NEG                  | NEG                                     | POS                                      | POS                                             | POS                             | POS                       | NEG                                      | NEG                                      | AMB            |
| Riyadh-3028763                                           | POS                                                          | AMB                           | NEG                  | NEG                                     | POS                                      | POS                                             | POS                             | POS                       | NEG                                      | NEG                                      | AMB            |
| Riyadh-2817437                                           | POS                                                          | AMB                           | NEG                  | NEG                                     | POS                                      | POS                                             | POS                             | POS                       | NEG                                      | NEG                                      | AMB            |
| Riyadh-2793706                                           | POS                                                          | NEG                           | NEG                  | NEG                                     | POS                                      | POS                                             | POS                             | POS                       | NEG                                      | NEG                                      | NEG            |
| Riyadh-2818797                                           | POS                                                          | POS                           | NEG                  | NEG                                     | POS                                      | POS                                             | POS                             | POS                       | NEG                                      | NEG                                      | NEG            |
| Riyadh-2822825                                           | POS                                                          | AMB                           | NEG                  | NEG                                     | POS                                      | POS                                             | POS                             | POS                       | NEG                                      | NEG                                      | AMB            |
| Riyadh-2888905                                           | POS                                                          | AMB                           | NEG                  | NEG                                     | POS                                      | POS                                             | POS                             | POS                       | NEG                                      | NEG                                      | AMB            |
| Riyadh-2888915                                           | POS                                                          | AMB                           | NEG                  | NEG                                     | POS                                      | POS                                             | POS                             | POS                       | NEG                                      | NEG                                      | NEG            |
| Riyadh-2567782                                           | POS                                                          | NEG                           | NEG                  | NEG                                     | POS                                      | POS                                             | POS                             | POS                       | NEG                                      | NEG                                      | NEG            |
| Riyadh-2891670                                           | POS                                                          | AMB                           | NEG                  | NEG                                     | POS                                      | POS                                             | POS                             | POS                       | NEG                                      | NEG                                      | NEG            |
| Riyadh-3006920                                           | POS                                                          | AMB                           | NEG                  | NEG                                     | POS                                      | POS                                             | POS                             | POS                       | NEG                                      | NEG                                      | AMB            |
| Riyadh-281276-1                                          | POS                                                          | AMB                           | NEG                  | NEG                                     | POS                                      | POS                                             | POS                             | POS                       | NEG                                      | NEG                                      | AMB            |
| Riyadh-0295102                                           | POS                                                          | NEG                           | NEG                  | NEG                                     | POS                                      | POS                                             | POS                             | POS                       | NEG                                      | NEG                                      | NEG            |
| Riyadh-2820597                                           | POS                                                          | POS                           | NEG                  | NEG                                     | POS                                      | POS                                             | POS                             | POS                       | NEG                                      | NEG                                      | NEG            |
| Riyadh-2822088                                           | POS                                                          | POS                           | NEG                  | NEG                                     | POS                                      | POS                                             | POS                             | POS                       | NEG                                      | NEG                                      | AMB            |
| Riyadh-3010092                                           | POS                                                          | AMB                           | NEG                  | NEG                                     | POS                                      | POS                                             | POS                             | POS                       | NEG                                      | NEG                                      | NEG            |
| Riyadh-3022844                                           | POS                                                          | AMB                           | NEG                  | NEG                                     | POS                                      | POS                                             | POS                             | POS                       | NEG                                      | NEG                                      | NEG            |
| Riyadh-3108214-2                                         | POS                                                          | NEG                           | NEG                  | NEG                                     | POS                                      | POS                                             | POS                             | POS                       | NEG                                      | NEG                                      | NEG            |
| Riyadh-2823926                                           | POS                                                          | POS                           | NEG                  | NEG                                     | POS                                      | POS                                             | POS                             | POS                       | NEG                                      | NEG                                      | POS            |
| Riyadh-1                                                 | POS                                                          | AMB                           | NEG                  | NEG                                     | POS                                      | POS                                             | POS                             | POS                       | NEG                                      | NEG                                      | POS            |
| Riyadh-2818388                                           | POS                                                          | POS                           | NEG                  | NEG                                     | POS                                      | POS                                             | POS                             | POS                       | NEG                                      | NEG                                      | NEG            |
| Riyadh-3112315                                           | POS                                                          | AMB                           | NEG                  | NEG                                     | POS                                      | POS                                             | POS                             | POS                       | NEG                                      | NEG                                      | AMB            |
| <b>CC9/ST834-MRSA-(atypical SCCmec)</b>                  | NEG                                                          | NEG                           | NEG                  | NEG                                     | POS                                      | NEG                                             | NEG                             | NEG                       | POS                                      | POS                                      | NEG            |
| Riyadh-3103521                                           | NEG                                                          | NEG                           | NEG                  | NEG                                     | POS                                      | NEG                                             | NEG                             | NEG                       | POS                                      | POS                                      | NEG            |
| <b>CC22-MRSA-IV, Barnim/UK-EMRSA-15</b>                  | NEG                                                          | AMB                           | POS                  | NEG                                     | POS                                      | NEG                                             | POS                             | NEG                       | POS                                      | POS                                      | POS            |
| Riyadh-2553350                                           | NEG                                                          | AMB                           | POS                  | NEG                                     | POS                                      | NEG                                             | POS                             | NEG                       | POS                                      | POS                                      | POS            |
| Riyadh-2571758                                           | NEG                                                          | AMB                           | POS                  | NEG                                     | POS                                      | NEG                                             | POS                             | NEG                       | POS                                      | POS                                      | POS            |
| Riyadh-3029203                                           | NEG                                                          | AMB                           | POS                  | NEG                                     | POS                                      | NEG                                             | AMB                             | NEG                       | POS                                      | POS                                      | POS            |
| Riyadh-3039785                                           | NEG                                                          | AMB                           | POS                  | NEG                                     | POS                                      | NEG                                             | AMB                             | NEG                       | POS                                      | POS                                      | POS            |
| Riyadh-3105594                                           | NEG                                                          | AMB                           | POS                  | NEG                                     | POS                                      | NEG                                             | AMB                             | NEG                       | POS                                      | POS                                      | POS            |
| Riyadh_IC_204-2                                          | NEG                                                          | POS                           | POS                  | NEG                                     | POS                                      | NEG                                             | AMB                             | NEG                       | POS                                      | POS                                      | POS            |
| Riyadh-3003974                                           | NEG                                                          | POS                           | POS                  | NEG                                     | POS                                      | NEG                                             | AMB                             | NEG                       | POS                                      | POS                                      | POS            |
| Riyadh_IC_067                                            | NEG                                                          | AMB                           | POS                  | NEG                                     | POS                                      | NEG                                             | AMB                             | NEG                       | POS                                      | POS                                      | POS            |
| Riyadh-2988627                                           | NEG                                                          | AMB                           | POS                  | NEG                                     | POS                                      | NEG                                             | AMB                             | NEG                       | POS                                      | POS                                      | AMB            |
| Riyadh-3112581                                           | NEG                                                          | NEG                           | POS                  | NEG                                     | POS                                      | NEG                                             | AMB                             | NEG                       | POS                                      | POS                                      | POS            |
| <b>CC22-MRSA-IV [PVL+]</b>                               | NEG                                                          | NEG                           | POS                  | NEG                                     | POS                                      | NEG                                             | AMB                             | NEG                       | POS                                      | POS                                      | AMB            |
| Riyadh-2781996-1                                         | NEG                                                          | NEG                           | POS                  | NEG                                     | POS                                      | NEG                                             | AMB                             | NEG                       | POS                                      | POS                                      | AMB            |
| Riyadh-3103432                                           | NEG                                                          | AMB                           | POS                  | NEG                                     | POS                                      | NEG                                             | NEG                             | NEG                       | POS                                      | POS                                      | POS            |
| Riyadh-3026502                                           | NEG                                                          | NEG                           | POS                  | NEG                                     | POS                                      | NEG                                             | NEG                             | NEG                       | POS                                      | POS                                      | NEG            |
| Riyadh-3081378-2                                         | NEG                                                          | AMB                           | POS                  | NEG                                     | POS                                      | NEG                                             | NEG                             | NEG                       | POS                                      | POS                                      | AMB            |
| Riyadh_IC_185                                            | NEG                                                          | AMB                           | POS                  | NEG                                     | POS                                      | NEG                                             | POS                             | NEG                       | POS                                      | POS                                      | POS            |
| Riyadh_IC_204-1                                          | NEG                                                          | AMB                           | POS                  | NEG                                     | POS                                      | NEG                                             | POS                             | NEG                       | POS                                      | POS                                      | POS            |
| Riyadh-3159371                                           | NEG                                                          | AMB                           | POS                  | NEG                                     | POS                                      | NEG                                             | POS                             | NEG                       | POS                                      | POS                                      | POS            |
| Riyadh-2753975                                           | NEG                                                          | AMB                           | POS                  | NEG                                     | POS                                      | NEG                                             | AMB                             | NEG                       | POS                                      | POS                                      | POS            |
| Riyadh-2775605                                           | NEG                                                          | NEG                           | POS                  | NEG                                     | POS                                      | NEG                                             | NEG                             | NEG                       | POS                                      | POS                                      | POS            |
| Riyadh-2781996-2                                         | NEG                                                          | NEG                           | POS                  | NEG                                     | POS                                      | NEG                                             | NEG                             | NEG                       | POS                                      | POS                                      | AMB            |
| Riyadh-2823783-2                                         | NEG                                                          | AMB                           | POS                  | NEG                                     | POS                                      | NEG                                             | POS                             | NEG                       | POS                                      | POS                                      | POS            |
| Riyadh-2876601                                           | NEG                                                          | AMB                           | POS                  | NEG                                     | POS                                      | NEG                                             | NEG                             | NEG                       | POS                                      | POS                                      | POS            |
| Riyadh-3036074                                           | NEG                                                          | POS                           | POS                  | NEG                                     | POS                                      | NEG                                             | POS                             | NEG                       | POS                                      | POS                                      | POS            |
| Riyadh-3053099                                           | NEG                                                          | AMB                           | POS                  | NEG                                     | POS                                      | NEG                                             | AMB                             | NEG                       | POS                                      | POS                                      | POS            |
| Riyadh-3055366                                           | NEG                                                          | AMB                           | POS                  | NEG                                     | POS                                      | NEG                                             | AMB                             | NEG                       | POS                                      | POS                                      | POS            |
| Riyadh-3082712                                           | NEG                                                          | AMB                           | POS                  | NEG                                     | POS                                      | NEG                                             | AMB                             | NEG                       | POS                                      | POS                                      | POS            |
| Riyadh-3087502                                           | NEG                                                          | NEG                           | POS                  | NEG                                     | POS                                      | NEG                                             | NEG                             | NEG                       | POS                                      | POS                                      | NEG            |
| Riyadh-6                                                 | NEG                                                          | NEG                           | POS                  | NEG                                     | POS                                      | NEG                                             | POS                             | NEG                       | POS                                      | POS                                      | POS            |
| Riyadh-7                                                 | NEG                                                          | NEG                           | POS                  | NEG                                     | POS                                      | NEG                                             | POS                             | NEG                       | POS                                      | POS                                      | POS            |
| Riyadh-8                                                 | NEG                                                          | NEG                           | POS                  | NEG                                     | POS                                      | NEG                                             | POS                             | NEG                       | POS                                      | POS                                      | POS            |
| <b>CC30-MRSA-IV [PVL+], Southwest Pacific Clone</b>      | NEG                                                          | NEG                           | POS                  | POS                                     | POS                                      | POS                                             | NEG                             | POS                       | POS                                      | POS                                      | POS            |
| Riyadh-10                                                | NEG                                                          | NEG                           | POS                  | POS                                     | POS                                      | POS                                             | NEG                             | POS                       | POS                                      | POS                                      | POS            |
| Riyadh_IC_123                                            | NEG                                                          | AMB                           | POS                  | POS                                     | POS                                      | POS                                             | NEG                             | POS                       | POS                                      | POS                                      | POS            |
| Riyadh-3080713                                           | NEG                                                          | AMB                           | POS                  | POS                                     | POS                                      | POS                                             | NEG                             | POS                       | POS                                      | POS                                      | POS            |
| Riyadh-2803856                                           | NEG                                                          | AMB                           | POS                  | POS                                     | POS                                      | POS                                             | NEG                             | POS                       | POS                                      | POS                                      | POS            |
| Riyadh-2817276-1                                         | NEG                                                          | POS                           | POS                  | POS                                     | POS                                      | POS                                             | NEG                             | POS                       | POS                                      | POS                                      | POS            |
| Riyadh-2817571-2                                         | NEG                                                          | POS                           | POS                  | POS                                     | POS                                      | POS                                             | NEG                             | POS                       | POS                                      | POS                                      | POS            |
| Riyadh-3033868                                           | NEG                                                          | NEG                           | POS                  | POS                                     | POS                                      | POS                                             | NEG                             | POS                       | POS                                      | POS                                      | POS            |
| Riyadh-2550108                                           | NEG                                                          | NEG                           | POS                  | POS                                     | POS                                      | POS                                             | NEG                             | POS                       | POS                                      | POS                                      | POS            |
| Riyadh-3095056-2                                         | NEG                                                          | NEG                           | POS                  | POS                                     | POS                                      | POS                                             | NEG                             | POS                       | POS                                      | POS                                      | POS            |
| Riyadh-2819899                                           | NEG                                                          | NEG                           | POS                  | POS                                     | POS                                      | POS                                             | NEG                             | POS                       | POS                                      | POS                                      | POS            |
| Riyadh-2821805                                           | NEG                                                          | NEG                           | POS                  | POS                                     | POS                                      | POS                                             | NEG                             | POS                       | POS                                      | POS                                      | POS            |
| Riyadh-3013928                                           | NEG                                                          | AMB                           | POS                  | POS                                     | POS                                      | POS                                             | NEG                             | POS                       | POS                                      | POS                                      | POS            |
| Riyadh-3029402                                           | NEG                                                          | AMB                           | POS                  | POS                                     | POS                                      | POS                                             | NEG                             | POS                       | POS                                      | POS                                      | POS            |
| <b>CC45/agr IV-MRSA-IV, WA MRSA-23</b>                   | NEG                                                          | NEG                           | POS                  | NEG                                     | POS                                      | POS                                             | AMB                             | POS                       | NEG                                      | NEG                                      | NEG            |
| Riyadh-3081378-1                                         | NEG                                                          | NEG                           | POS                  | NEG                                     | POS                                      | POS                                             | AMB                             | POS                       | NEG                                      | NEG                                      | NEG            |
| <b>CC80-MRSA-IV</b>                                      | NEG                                                          | AMB                           | NEG                  | NEG                                     | POS                                      | NEG                                             | POS                             | NEG                       | POS                                      | POS                                      | POS            |
| Riyadh-3107635                                           | NEG                                                          | AMB                           | NEG                  | NEG                                     | POS                                      | NEG                                             | POS                             | NEG                       | POS                                      | POS                                      | POS            |
| Riyadh-2987458                                           | NEG                                                          | AMB                           | NEG                  | NEG                                     | POS                                      | NEG                                             | POS                             | NEG                       | POS                                      | POS                                      | POS            |
| <b>CC80-MRSA-IV [PVL+], European caMRSA Clone</b>        | NEG                                                          | NEG                           | NEG                  | NEG                                     | POS                                      | NEG                                             | POS                             | NEG                       | POS                                      | POS                                      | POS            |
| Riyadh-2988048                                           | NEG                                                          | NEG                           | NEG                  | NEG                                     | POS                                      | NEG                                             | POS                             | NEG                       | POS                                      | POS                                      | POS            |
| Riyadh-2990585-2                                         | NEG                                                          | NEG                           | NEG                  | NEG                                     | POS                                      | NEG                                             | POS                             | NEG                       | POS                                      | POS                                      | POS            |
| Riyadh-2990585-1                                         | NEG                                                          | AMB                           | NEG                  | NEG                                     | POS                                      | NEG                                             | POS                             | NEG                       | POS                                      | POS                                      | POS            |
| Riyadh-2826033                                           | NEG                                                          | AMB                           | NEG                  | NEG                                     | POS                                      | NEG                                             | POS                             | NEG                       | POS                                      | POS                                      | POS            |
| Riyadh-1601562                                           | NEG                                                          | NEG                           | NEG                  | NEG                                     | POS                                      | NEG                                             | POS                             | NEG                       | POS                                      | POS                                      | POS            |
| Riyadh-2569940                                           | NEG                                                          | AMB                           | NEG                  | NEG                                     | POS                                      | NEG                                             | POS                             | NEG                       | POS                                      | POS                                      | POS            |
| Riyadh-2571692                                           | NEG                                                          | NEG                           | NEG                  | NEG                                     | POS                                      | NEG                                             | POS                             | NEG                       | POS                                      | POS                                      | POS            |
| Riyadh-2763029                                           | NEG                                                          | AMB                           | NEG                  | NEG                                     | POS                                      | NEG                                             | POS                             | NEG                       | POS                                      | POS                                      | POS            |
| Riyadh-2767090                                           | NEG                                                          | AMB                           | NEG                  | NEG                                     | POS                                      | NEG                                             | POS                             | NEG                       | POS                                      | POS                                      | POS            |
| Riyadh-2775130                                           | NEG                                                          | NEG                           | NEG                  | NEG                                     | POS                                      | NEG                                             | POS                             | NEG                       | POS                                      | POS                                      | AMB            |
| Riyadh-2778256                                           | NEG                                                          | AMB                           | NEG                  | NEG                                     | POS                                      | NEG                                             | POS                             | NEG                       | POS                                      | POS                                      | POS            |
| Riyadh-2817505                                           | NEG                                                          | AMB                           | NEG                  | NEG                                     | POS                                      | NEG                                             | POS                             | NEG                       | POS                                      | POS                                      | POS            |
| Riyadh-3024912                                           | NEG                                                          | NEG                           | NEG                  | NEG                                     | POS                                      | NEG                                             | POS                             | NEG                       | POS                                      | POS                                      | POS            |
| Riyadh-2786690                                           | NEG                                                          | AMB                           | NEG                  | NEG                                     | POS                                      | NEG                                             | POS                             | NEG                       | POS                                      | POS                                      | POS            |
| Riyadh-2829034                                           | NEG                                                          | AMB                           | NEG                  | NEG                                     | POS                                      | NEG                                             | POS                             | NEG                       | POS                                      | POS                                      | POS            |
| Riyadh-3                                                 | NEG                                                          | NEG                           | NEG                  | NEG                                     | POS                                      | NEG                                             | POS                             | NEG                       | POS                                      | POS                                      | POS            |
| Riyadh-5                                                 | NEG                                                          | AMB                           | NEG                  | NEG                                     | POS                                      | NEG                                             | POS                             | NEG                       | POS                                      | POS                                      | POS            |
| Riyadh-2553167                                           | NEG                                                          | NEG                           | NEG                  | NEG                                     | POS                                      | NEG                                             | POS                             | NEG                       | POS                                      | POS                                      | POS            |
| Riyadh-3002592                                           | NEG                                                          | AMB                           | NEG                  | NEG                                     | POS                                      | NEG                                             | POS                             | NEG                       | POS                                      | POS                                      | AMB            |
| <b>CC88-MRSA-IV [PVL+]</b>                               | NEG                                                          | AMB                           | NEG                  | NEG                                     | POS                                      | NEG                                             | POS                             | NEG                       | POS                                      | POS                                      | NEG            |
| Riyadh-2736996                                           | NEG                                                          | AMB                           | NEG                  | NEG                                     | POS                                      | NEG                                             | POS                             | NEG                       | POS                                      | POS                                      | NEG            |
| Riyadh-2942396                                           | NEG                                                          | AMB                           | NEG                  | NEG                                     | POS                                      | NEG                                             | POS                             |                           |                                          |                                          |                |
